# Supplementary material for: Rewiring of primary metabolism for ammonium recycling under short-term low CO2 treatment – its implication for C4 evolution
Source: Front Plant Sci. 2024 Aug 1;15:1322261. doi: 10.3389/fpls.2024.1322261 (PMC11324553; doi:10.3389/fpls.2024.1322261)
Supplement: Supplementary file 2 [file DataSheet_1.xlsx]

## Sheet: 1-The DEGs under LC treatment
Table S1: The differentially expressed genes (DEGs) in A. thaliana leaf under low CO2 treatment.
The genes having adjusted P-value <0.05 were extracted. In our experiments, the Log2 (LC/NC) on gene expression was calculated.NC (normal CO2,400ppm), LC (low CO2, 100ppm)
GeneID	baseMean	log2FoldChange	lfcSE	stat	pvalue	padj
AT3G26200	42.401	-3.33178	0.359051	9.2794	1.7043e-20	3.22676e-18
AT2G38530	322.857	-3.23605	0.279961	11.5589	6.65266e-31	5.80488e-28
AT2G22770	49.7872	-3.22081	0.319862	10.0694	7.54517e-24	2.48236e-21
AT1G44800	184.363	-2.73362	0.248949	10.9806	4.73564e-28	2.37599e-25
AT4G01390	270.952	-2.62279	0.363726	7.2109	5.5583e-13	2.94326e-11
AT5G14690	16.2205	-2.621	0.351561	7.45534	8.96381e-14	5.27551e-12
AT3G16460	269.645	-2.58111	0.374068	6.90012	5.19592e-12	2.29685e-10
AT2G30010	224.105	-2.5503	0.270689	9.42154	4.44513e-21	9.01105e-19
AT2G23010	106.09	-2.5465	0.320297	7.95044	1.85845e-15	1.51615e-13
AT5G60800	187.267	-2.40837	0.249959	9.63505	5.68663e-22	1.42656e-19
AT4G30410	73.9658	-2.37971	0.303838	7.83216	4.79565e-15	3.6743e-13
AT1G53830	37.9728	-2.35727	0.376035	6.26875	3.63954e-10	1.12545e-08
AT1G66940	199.5	-2.32341	0.260827	8.90786	5.2027e-19	7.73429e-17
AT1G77210	154.774	-2.30312	0.28024	8.2184	2.06235e-16	1.91617e-14
AT5G07570	14.0262	-2.29919	0.373621	6.15379	7.56542e-10	2.20044e-08
AT5G03120	68.6286	-2.2409	0.237379	9.44016	3.72204e-21	7.70078e-19
AT3G62150	57.5882	-2.22231	0.265292	8.37685	5.43633e-17	5.65293e-15
AT4G29700	203.042	-2.221	0.292835	7.58449	3.33791e-14	2.14021e-12
AT5G38970	14.294	-2.21909	0.379788	5.84297	5.1279e-09	1.23692e-07
AT3G49570	20.1262	-2.20684	0.317392	6.95304	3.57486e-12	1.62684e-10
AT3G49580	9.48786	-2.20074	0.371519	5.92363	3.1491e-09	7.92964e-08
AT2G45450	108.668	-2.19692	0.26226	8.37687	5.43545e-17	5.65293e-15
AT4G27860	92.6831	-2.16267	0.326816	6.61741	3.65552e-11	1.38682e-09
AT5G23660	121.903	-2.15399	0.336433	6.40245	1.52907e-10	5.22776e-09
AT5G22500	80.8518	-2.14837	0.31849	6.74548	1.52522e-11	6.14652e-10
AT5G44020	990.375	-2.14472	0.23747	9.03154	1.69269e-19	2.76184e-17
AT1G19610	11.7188	-2.12793	0.380429	5.59352	2.22512e-08	4.70557e-07
AT2G42040	137.033	-2.08986	0.212209	9.84813	6.98277e-23	1.97376e-20
AT5G62730	12.7981	-2.08765	0.377654	5.52795	3.23991e-08	6.58782e-07
AT1G06620	40.1761	-2.08334	0.368345	5.65593	1.55002e-08	3.396e-07
AT3G15950	140.862	-2.07903	0.328077	6.33702	2.34257e-10	7.54624e-09
AT3G55646	280.434	-2.07296	0.202935	10.2149	1.70033e-24	6.09354e-22
AT5G18050	57.1234	-2.07212	0.353245	5.86597	4.46528e-09	1.08754e-07
AT2G45400	62.8447	-2.06671	0.25671	8.05075	8.22911e-16	7.08798e-14
AT2G39330	769.329	-2.06053	0.380525	5.41498	6.12945e-08	1.16378e-06
AT2G36050	24.9198	-2.05792	0.344239	5.97816	2.25667e-09	5.9279e-08
AT1G33930	17.6073	-2.05788	0.375386	5.48204	4.20449e-08	8.3297e-07
AT4G23680	40.063	-2.01752	0.33327	6.05372	1.41541e-09	3.85949e-08
AT2G26710	88.2578	-2.00245	0.312131	6.41542	1.40436e-10	4.84263e-09
AT5G57780	176.216	-1.9974	0.276251	7.23037	4.81668e-13	2.56408e-11
AT3G62040	11.8737	-1.99422	0.379829	5.2503	1.51854e-07	2.63858e-06
AT5G66590	406.722	-1.99416	0.237502	8.3964	4.60362e-17	4.86263e-15
AT3G14310	1158.08	-1.98756	0.215805	9.20998	3.26183e-20	5.84479e-18
AT1G64200	478.672	-1.98527	0.209619	9.47088	2.77485e-21	5.9243e-19
AT1G49130	111.392	-1.985	0.227856	8.71165	2.99471e-18	3.92817e-16
AT3G16470	1549.91	-1.9827	0.348964	5.68168	1.3338e-08	2.99418e-07
AT1G10990	7.81585	-1.9799	0.380316	5.20593	1.9303e-07	3.26637e-06
AT3G60130	263.109	-1.96954	0.218108	9.03011	1.71494e-19	2.77557e-17
AT2G27402	222.482	-1.96777	0.29924	6.57591	4.83555e-11	1.80716e-09
AT3G56000	46.2144	-1.96574	0.256967	7.64975	2.01368e-14	1.34261e-12
AT3G51290	46.5238	-1.96014	0.285749	6.85964	6.90347e-12	2.96309e-10
AT1G52400	8859.55	-1.95741	0.380386	5.14584	2.66324e-07	4.35248e-06
AT1G04040	95.7307	-1.95641	0.234071	8.35818	6.36936e-17	6.48867e-15
AT3G50190	7.56342	-1.94347	0.380366	5.10946	3.23077e-07	5.15408e-06
AT5G06720	12.9117	-1.91592	0.375671	5.09999	3.39664e-07	5.37172e-06
AT4G12400	152.444	-1.90183	0.237732	7.99986	1.24556e-15	1.05473e-13
AT1G25230	357.1	-1.89445	0.341955	5.54006	3.02373e-08	6.19849e-07
AT1G11000	60.9698	-1.89383	0.342683	5.52648	3.26721e-08	6.6299e-07
AT4G36570	39.5327	-1.89161	0.364919	5.18363	2.17604e-07	3.6332e-06
AT1G52000	1805.79	-1.88001	0.3805	4.94089	7.77675e-07	1.114e-05
AT1G62770	10.8118	-1.87901	0.375001	5.01067	5.42415e-07	8.10552e-06
AT3G02040	60.4747	-1.8689	0.327993	5.69798	1.21236e-08	2.75237e-07
AT1G77520	6.20893	-1.86471	0.380345	4.90267	9.45408e-07	1.31943e-05
AT4G32480	76.9401	-1.86227	0.288489	6.45527	1.08025e-10	3.82319e-09
AT3G63470	14.4404	-1.83312	0.336166	5.45304	4.95172e-08	9.64816e-07
AT1G19670	3509.51	-1.81296	0.335074	5.41062	6.28083e-08	1.18803e-06
AT3G12145	199.063	-1.80976	0.249459	7.25476	4.02362e-13	2.17655e-11
AT4G31730	15.9655	-1.8096	0.366006	4.94419	7.64622e-07	1.10001e-05
AT3G16420	740.675	-1.80686	0.345462	5.23027	1.69267e-07	2.9159e-06
AT1G48260	138.334	-1.80453	0.158439	11.3894	4.72107e-30	3.15824e-27
AT3G16530	180.986	-1.77814	0.378663	4.69585	2.65502e-06	3.26693e-05
AT3G50280	10.8507	-1.77708	0.380441	4.67111	2.9957e-06	3.65031e-05
AT4G04840	1120.38	-1.77197	0.262602	6.74776	1.5014e-11	6.0627e-10
AT1G29280	5.48368	-1.76883	0.377074	4.69095	2.71941e-06	3.33797e-05
AT4G01335	9.00145	-1.76859	0.37429	4.72517	2.29919e-06	2.87134e-05
AT2G46250	380.755	-1.76216	0.153514	11.4788	1.6862e-30	1.25334e-27
AT2G42170	54.0479	-1.75294	0.261815	6.69533	2.15184e-11	8.46769e-10
AT1G52410	1185.31	-1.74063	0.37859	4.59767	4.27246e-06	4.9988e-05
AT1G75960	117.007	-1.74041	0.202694	8.5864	8.97364e-18	1.09812e-15
AT5G18010	18.1705	-1.73692	0.371779	4.67191	2.98416e-06	3.64068e-05
AT1G06160	19.0305	-1.72821	0.374613	4.61331	3.96298e-06	4.68117e-05
AT5G12110	584.449	-1.72714	0.260699	6.62503	3.47169e-11	1.31957e-09
AT1G77870	59.8214	-1.72544	0.245444	7.02988	2.06709e-12	9.92448e-11
AT5G16410	28.5785	-1.72453	0.378515	4.55605	5.21248e-06	5.92352e-05
AT4G25707	17.2151	-1.72277	0.34094	5.053	4.34916e-07	6.67814e-06
AT1G07090	101.091	-1.71954	0.244219	7.04097	1.9091e-12	9.25453e-11
AT1G51460	6.96079	-1.71656	0.377125	4.55169	5.32155e-06	6.03038e-05
AT3G12580	1305.62	-1.71012	0.254441	6.7211	1.80361e-11	7.22486e-10
AT5G20740	96.3756	-1.7067	0.269823	6.32526	2.52809e-10	8.07903e-09
AT3G48290	98.0272	-1.70376	0.204622	8.3264	8.33365e-17	8.27961e-15
AT1G07400	10.6921	-1.70348	0.369565	4.60941	4.03823e-06	4.75327e-05
AT1G32780	77.1667	-1.70085	0.244951	6.94365	3.82106e-12	1.73495e-10
AT2G46530	302.143	-1.69682	0.146011	11.6212	3.21473e-31	2.93257e-28
AT1G03470	18.607	-1.69144	0.31899	5.3025	1.14228e-07	2.05969e-06
AT1G04180	10.3182	-1.68992	0.379699	4.45068	8.55984e-06	9.12389e-05
AT4G35750	944.419	-1.68818	0.198955	8.48525	2.1526e-17	2.4407e-15
AT5G01740	28.7388	-1.68784	0.341182	4.94705	7.53475e-07	1.08656e-05
AT1G24070	162.063	-1.6847	0.378077	4.45598	8.3512e-06	8.93868e-05
AT1G70890	1861.41	-1.6844	0.1713	9.83305	8.11245e-23	2.26123e-20
AT1G62290	92.3429	-1.67094	0.269777	6.19378	5.87396e-10	1.74644e-08
AT5G19120	358.353	-1.6679	0.359958	4.6336	3.59362e-06	4.298e-05
AT3G58200	28.7091	-1.66469	0.309718	5.37486	7.66418e-08	1.42156e-06
AT1G20620	27446.4	-1.66175	0.198834	8.35748	6.40706e-17	6.49411e-15
AT5G67411	13.6192	-1.66126	0.355674	4.67073	3.00124e-06	3.65485e-05
AT3G22240	15.5955	-1.65786	0.36995	4.4813	7.41894e-06	8.08749e-05
AT1G60960	216.302	-1.65714	0.173421	9.5556	1.22869e-21	2.83432e-19
AT4G36410	109.412	-1.64848	0.286355	5.75677	8.57377e-09	1.98692e-07
AT5G55930	80.6081	-1.64637	0.238881	6.892	5.50148e-12	2.42125e-10
AT4G25710	79.4022	-1.6439	0.224477	7.32324	2.42057e-13	1.34195e-11
AT2G42800	12.2355	-1.643	0.345323	4.75787	1.95651e-06	2.50416e-05
AT2G22980	1786.68	-1.63961	0.204703	8.00967	1.15015e-15	9.82226e-14
AT1G65890	13.4025	-1.63906	0.380276	4.31017	1.63126e-05	0.000161668
AT3G51910	4.58008	-1.63676	0.379055	4.318	1.5745e-05	0.000157364
AT5G23050	175.001	-1.62771	0.184036	8.84452	9.19195e-19	1.32715e-16
AT5G04310	26.3534	-1.62327	0.278324	5.83229	5.46729e-09	1.31248e-07
AT5G05600	262.929	-1.6212	0.376647	4.30429	1.67521e-05	0.000165452
AT1G74675	8.32983	-1.61634	0.377817	4.27812	1.88482e-05	0.000183624
AT5G18170	844.095	-1.61185	0.187446	8.59902	8.03969e-18	9.89868e-16
AT3G15720	22.2148	-1.61164	0.366744	4.39447	1.11044e-05	0.000115052
AT5G03860	6.32753	-1.61083	0.380271	4.236	2.27536e-05	0.000216418
AT5G36910	120.866	-1.609	0.312705	5.14541	2.66937e-07	4.35895e-06
AT3G43960	70.8492	-1.60768	0.185533	8.66519	4.50768e-18	5.76207e-16
AT1G08930	435.727	-1.60688	0.210136	7.64685	2.05961e-14	1.36869e-12
AT2G34490	142.416	-1.60508	0.2427	6.61346	3.75432e-11	1.42161e-09
AT2G21650	287.374	-1.60389	0.291098	5.5098	3.59246e-08	7.22416e-07
AT1G22330	91.2674	-1.60112	0.327787	4.88465	1.03615e-06	1.42889e-05
AT2G01610	43.4667	-1.58355	0.324286	4.8832	1.0438e-06	1.43578e-05
AT4G31820	416.199	-1.58254	0.174172	9.0861	1.02659e-19	1.71689e-17
AT1G15125	135.372	-1.5821	0.371546	4.25815	2.06128e-05	0.000199075
AT4G26255	34.2673	-1.57609	0.36545	4.31274	1.61241e-05	0.000160116
AT3G22740	294.963	-1.57538	0.346602	4.5452	5.48832e-06	6.19837e-05
AT1G78260	15.6493	-1.56762	0.362733	4.3217	1.54828e-05	0.000155052
AT5G03985	6.39068	-1.56747	0.379541	4.12991	3.62913e-05	0.000322984
AT3G16690	75.6661	-1.56258	0.215316	7.25715	3.95344e-13	2.14437e-11
AT4G15200	45.3288	-1.56108	0.364341	4.28465	1.83026e-05	0.000178829
AT3G28650	33.6094	-1.5544	0.273628	5.68069	1.34149e-08	3.00472e-07
AT2G24762	231.805	-1.55304	0.230284	6.74404	1.54038e-11	6.19516e-10
AT5G44572	40.2515	-1.55084	0.325165	4.76939	1.84782e-06	2.37869e-05
AT1G31710	251.281	-1.55035	0.288267	5.37818	7.52429e-08	1.3969e-06
AT2G15880	123.923	-1.54743	0.370935	4.17171	3.02322e-05	0.000275411
AT3G16400	640.035	-1.5474	0.226434	6.83379	8.27024e-12	3.48688e-10
AT3G53210	34.9038	-1.54456	0.259988	5.94088	2.835e-09	7.21111e-08
AT1G70830	2819.63	-1.54345	0.248123	6.22048	4.9564e-10	1.5117e-08
AT1G26800	113.876	-1.54297	0.302154	5.10658	3.28044e-07	5.21674e-06
AT4G23820	447.928	-1.54174	0.26096	5.90794	3.46409e-09	8.65764e-08
AT1G01190	203.909	-1.54112	0.312603	4.92996	8.22471e-07	1.16982e-05
AT1G74670	2145.22	-1.53477	0.378797	4.05169	5.08481e-05	0.000433423
AT1G16370	4.29588	-1.53269	0.379968	4.03374	5.48964e-05	0.000463295
AT5G11550	280.698	-1.53152	0.18514	8.27222	1.31491e-16	1.25661e-14
AT1G73325	327.331	-1.52731	0.372384	4.10145	4.10576e-05	0.000359819
AT4G04810	80.0262	-1.52729	0.310947	4.91174	9.02724e-07	1.26957e-05
AT5G25210	23.3534	-1.52549	0.348163	4.38153	1.17847e-05	0.000121285
AT2G46640	136.638	-1.52503	0.197749	7.71196	1.23902e-14	8.75558e-13
AT2G43620	38.456	-1.52413	0.352082	4.3289	1.49854e-05	0.000150597
AT5G41120	81.7749	-1.52395	0.251048	6.07037	1.27618e-09	3.50364e-08
AT5G66580	95.1115	-1.52392	0.307648	4.95347	7.29027e-07	1.05334e-05
AT5G40450	1930.32	-1.52156	0.21992	6.91871	4.55766e-12	2.02362e-10
AT5G46690	250.328	-1.52139	0.241663	6.29548	3.06447e-10	9.60949e-09
AT1G03870	436.174	-1.52086	0.165986	9.16258	5.0669e-20	8.76618e-18
AT2G41480	63.1255	-1.51806	0.257786	5.88882	3.88965e-09	9.61347e-08
AT2G44740	55.4898	-1.51791	0.339652	4.46902	7.85794e-06	8.5014e-05
AT3G03325	5.49356	-1.51475	0.380069	3.98544	6.73539e-05	0.000552627
AT3G13450	193.823	-1.51323	0.256134	5.90797	3.46353e-09	8.65764e-08
AT5G25460	2325.43	-1.51008	0.372082	4.05847	4.93958e-05	0.000422559
AT4G00950	68.3276	-1.50904	0.224768	6.71379	1.89636e-11	7.56622e-10
AT1G03620	18.3452	-1.50424	0.305345	4.92638	8.37672e-07	1.18723e-05
AT2G37900	58.5106	-1.50317	0.293057	5.12929	2.90839e-07	4.69199e-06
AT1G05010	2015.62	-1.50316	0.21123	7.11622	1.10924e-12	5.52389e-11
AT1G02340	27.4695	-1.4975	0.304387	4.91972	8.66695e-07	1.22405e-05
AT4G11360	180.282	-1.49449	0.19486	7.66958	1.72563e-14	1.17795e-12
AT5G22580	1326.82	-1.4926	0.344558	4.33193	1.47805e-05	0.00014906
AT2G47180	692.232	-1.49147	0.217004	6.873	6.28666e-12	2.73681e-10
AT4G22490	8.02915	-1.49129	0.376703	3.95879	7.53311e-05	0.000608133
AT1G28660	49.1525	-1.48529	0.227451	6.53015	6.57056e-11	2.4019e-09
AT2G45510	70.6213	-1.48507	0.253671	5.85431	4.78992e-09	1.16098e-07
AT1G70690	54.6379	-1.48267	0.336607	4.40473	1.05915e-05	0.000110307
AT3G22460	67.4231	-1.48091	0.324356	4.56568	4.97876e-06	5.69987e-05
AT5G63650	33.9277	-1.48088	0.3077	4.81275	1.48867e-06	1.97594e-05
AT5G12050	340.329	-1.47875	0.337452	4.38211	1.17536e-05	0.000121027
AT1G03850	12.753	-1.47534	0.352857	4.18113	2.90067e-05	0.000265937
AT5G24390	8.53149	-1.47495	0.367236	4.01636	5.91027e-05	0.00049299
AT3G04720	530.871	-1.47463	0.371596	3.96837	7.23671e-05	0.000587411
AT4G17460	350.185	-1.47342	0.232861	6.32747	2.49211e-10	7.97675e-09
AT2G43520	28.2235	-1.46796	0.303182	4.84185	1.28635e-06	1.7326e-05
AT1G17710	5.98992	-1.46578	0.378471	3.87289	0.000107551	0.000829532
AT3G02980	15.2373	-1.46503	0.325376	4.50257	6.71365e-06	7.41124e-05
AT4G13860	6.74728	-1.46313	0.380526	3.84503	0.000120536	0.000912156
AT2G37950	53.5304	-1.4609	0.258196	5.65812	1.53044e-08	3.36781e-07
AT1G34460	46.0181	-1.45591	0.305619	4.76381	1.89974e-06	2.43772e-05
AT5G04530	62.7907	-1.4541	0.336947	4.31553	1.59223e-05	0.000158454
AT3G50120	14.411	-1.45405	0.349431	4.16119	3.16592e-05	0.000286331
AT1G24020	432.914	-1.45224	0.349661	4.15328	3.27746e-05	0.000294297
AT1G79310	5.73948	-1.44969	0.376027	3.85527	0.0001156	0.000880449
AT4G08040	6.54943	-1.44782	0.373882	3.87239	0.000107774	0.000829977
AT2G32487	81.474	-1.44457	0.303616	4.75788	1.95636e-06	2.50416e-05
AT1G29510	123.442	-1.442	0.28417	5.07443	3.8865e-07	6.06517e-06
AT2G45170	301.254	-1.43921	0.280517	5.13055	2.889e-07	4.66823e-06
AT4G02290	41.4805	-1.43796	0.346925	4.14487	3.40009e-05	0.000304084
AT2G38310	327.393	-1.43671	0.149136	9.63355	5.76986e-22	1.42957e-19
AT2G22810	41.8558	-1.43354	0.375581	3.81686	0.000135159	0.00100389
AT5G24270	7.51789	-1.42732	0.372768	3.82896	0.000128684	0.000963639
AT5G05440	51.8893	-1.42482	0.300512	4.74131	2.12345e-06	2.68022e-05
AT1G78000	30.1769	-1.42466	0.278894	5.10823	3.25189e-07	5.17953e-06
AT2G21640	42.4483	-1.42465	0.318216	4.47701	7.5695e-06	8.24266e-05
AT3G16800	316.532	-1.42319	0.182374	7.8037	6.01174e-15	4.43565e-13
AT1G28290	270.365	-1.42242	0.259924	5.47246	4.43836e-08	8.73269e-07
AT1G45201	6752.6	-1.42222	0.221649	6.41652	1.39426e-10	4.81607e-09
AT5G23820	454.654	-1.42208	0.378277	3.75935	0.000170353	0.00122714
AT5G03875	7.86719	-1.4211	0.371345	3.8269	0.000129766	0.000969931
AT1G13608	6.62256	-1.41831	0.363872	3.89783	9.70569e-05	0.000757029
AT1G10970	143.328	-1.41672	0.165447	8.563	1.09968e-17	1.2982e-15
AT3G58850	80.9996	-1.41548	0.195342	7.24616	4.28765e-13	2.30694e-11
AT3G54260	105.084	-1.41368	0.252362	5.60179	2.12154e-08	4.50076e-07
AT4G25810	5.44874	-1.41135	0.380323	3.71094	0.000206494	0.00145103
AT2G37700	6.58289	-1.41095	0.379831	3.71468	0.000203462	0.00143323
AT5G09300	32.9084	-1.41095	0.311379	4.53129	5.86258e-06	6.56563e-05
AT1G60060	21.9654	-1.41083	0.333375	4.23194	2.31683e-05	0.000219634
AT1G23060	15.515	-1.41059	0.377723	3.73445	0.000188122	0.00134071
AT1G67400	83.6878	-1.40879	0.237977	5.91985	3.22232e-09	8.0937e-08
AT2G24610	4.56175	-1.40691	0.379815	3.7042	0.000212059	0.00148493
AT1G09415	173.956	-1.40615	0.182097	7.72197	1.14549e-14	8.15209e-13
AT5G44260	95.5473	-1.39794	0.33402	4.18519	2.84927e-05	0.000262062
AT4G04630	150.415	-1.39473	0.263142	5.30029	1.15622e-07	2.08109e-06
AT5G21170	315.184	-1.39245	0.360255	3.86519	0.000111002	0.000850779
AT5G09220	963.349	-1.39172	0.218668	6.36456	1.95856e-10	6.50766e-09
AT5G06930	24.1485	-1.3891	0.311432	4.46036	8.1822e-06	8.79532e-05
AT5G02540	148.906	-1.38883	0.295235	4.70414	2.54937e-06	3.14078e-05
AT1G23480	250.201	-1.38614	0.164663	8.41803	3.82873e-17	4.15345e-15
AT2G47010	25.1273	-1.38083	0.278584	4.95662	7.17297e-07	1.04013e-05
AT4G11290	10.9014	-1.37705	0.380439	3.61963	0.000295021	0.00196769
AT3G07010	386.604	-1.37684	0.28052	4.90817	9.19307e-07	1.28748e-05
ATMG01090	25.8656	-1.37598	0.319918	4.30102	1.70012e-05	0.000167664
AT5G65730	743.775	-1.37512	0.221543	6.20703	5.39968e-10	1.62957e-08
AT1G60730	127.233	-1.3743	0.174335	7.88307	3.1943e-15	2.52388e-13
AT2G20700	12.855	-1.37404	0.33953	4.04688	5.19058e-05	0.000440837
AT5G52640	326.15	-1.37232	0.235849	5.81865	5.93234e-09	1.41734e-07
AT3G24000	44.3104	-1.37164	0.280865	4.88365	1.04141e-06	1.43347e-05
AT5G18060	89.3604	-1.36869	0.297989	4.59308	4.36753e-06	5.08717e-05
AT1G68740	265.031	-1.3682	0.190848	7.16908	7.55056e-13	3.8755e-11
AT4G18197	111.518	-1.36777	0.263305	5.19463	2.0513e-07	3.44498e-06
AT1G09250	240.622	-1.36646	0.174834	7.81579	5.46214e-15	4.12104e-13
AT5G56550	51.2753	-1.36586	0.344587	3.96376	7.37776e-05	0.000597515
AT5G48850	31.0413	-1.36476	0.26696	5.11223	3.18386e-07	5.09139e-06
AT4G17480	6.73911	-1.36456	0.379748	3.59332	0.000326497	0.00214664
AT1G55200	41.0746	-1.36361	0.253035	5.38903	7.08408e-08	1.32251e-06
AT4G32890	59.5252	-1.36328	0.221844	6.14521	7.98595e-10	2.30604e-08
AT5G10300	45.4121	-1.3626	0.308945	4.4105	1.0313e-05	0.000107876
AT5G53830	52.7455	-1.36241	0.212162	6.42156	1.34886e-10	4.69154e-09
AT1G01180	150.148	-1.3622	0.154683	8.8064	1.29235e-18	1.77645e-16
AT2G14900	33.3326	-1.35762	0.310909	4.3666	1.26198e-05	0.000128823
AT4G34800	6.71881	-1.35725	0.377963	3.59095	0.000329474	0.00216285
AT1G66100	2997.05	-1.3554	0.316662	4.28029	1.86652e-05	0.000182106
AT1G79760	26.455	-1.35471	0.279085	4.8541	1.20936e-06	1.63881e-05
AT5G49800	47.1621	-1.3528	0.272951	4.95619	7.18883e-07	1.04168e-05
AT3G16050	27.125	-1.35129	0.290234	4.65585	3.22654e-06	3.90316e-05
AT1G75380	6109.91	-1.3501	0.240059	5.62403	1.86553e-08	3.99992e-07
AT5G02890	185.018	-1.34851	0.290274	4.64563	3.39039e-06	4.0768e-05
AT5G64510	70.5917	-1.34573	0.271585	4.95509	7.22963e-07	1.04608e-05
AT3G17790	229.479	-1.34559	0.233305	5.76749	8.04629e-09	1.88646e-07
AT2G07739	14.1847	-1.34389	0.333946	4.02428	5.71491e-05	0.000478883
AT5G61590	357.715	-1.3428	0.269672	4.97938	6.37867e-07	9.37141e-06
AT3G08595	6.31215	-1.34014	0.37484	3.57524	0.000349904	0.00227687
AT1G69780	126.006	-1.33927	0.203506	6.58099	4.67315e-11	1.74973e-09
AT3G25290	52.8465	-1.33613	0.252296	5.29588	1.18445e-07	2.12238e-06
AT1G52200	20.8621	-1.33444	0.349143	3.82204	0.000132351	0.000985949
AT5G66080	34.5576	-1.33324	0.274202	4.86226	1.16054e-06	1.58011e-05
AT5G16350	60.7567	-1.32964	0.207542	6.40662	1.48779e-10	5.11276e-09
AT1G62975	12.5268	-1.32953	0.355852	3.73619	0.000186831	0.00133292
AT5G46460	28.3345	-1.32935	0.264175	5.03209	4.8517e-07	7.33751e-06
AT3G53250	4.73829	-1.3273	0.377482	3.5162	0.000437767	0.00275495
AT2G23770	110.314	-1.32572	0.193925	6.83625	8.12915e-12	3.43461e-10
AT4G30180	7.50666	-1.32548	0.376984	3.516	0.000438094	0.00275615
AT2G31730	27.2673	-1.32481	0.295319	4.48604	7.25586e-06	7.93558e-05
AT4G36180	53.376	-1.32311	0.237857	5.56266	2.65701e-08	5.50862e-07
AT4G34790	14.816	-1.32286	0.380523	3.47641	0.000508168	0.00311783
AT1G08980	393.526	-1.3228	0.254216	5.20344	1.95637e-07	3.3077e-06
AT4G35730	23.4437	-1.32166	0.314291	4.20521	2.60838e-05	0.000243025
AT3G23550	39.5665	-1.32121	0.360893	3.66095	0.000251281	0.00171704
AT1G54010	111.929	-1.31756	0.360317	3.65667	0.000255516	0.00174065
AT3G23050	1513	-1.31734	0.186452	7.06531	1.60253e-12	7.82511e-11
AT2G34810	680.644	-1.31672	0.355597	3.70284	0.000213202	0.00149082
AT3G24500	196.355	-1.31579	0.197588	6.65924	2.75239e-11	1.05819e-09
AT1G54050	102.379	-1.31321	0.251533	5.22084	1.78111e-07	3.04993e-06
AT4G19820	53.671	-1.31217	0.257024	5.10526	3.30335e-07	5.24071e-06
AT4G25950	10.1906	-1.31114	0.366744	3.57509	0.000350114	0.00227687
AT3G50440	461.752	-1.31042	0.140385	9.33451	1.01459e-20	1.95786e-18
AT3G15356	232.185	-1.31014	0.35311	3.71028	0.000207028	0.00145325
AT2G27310	106.354	-1.30867	0.21698	6.0313	1.62642e-09	4.38719e-08
AT3G47750	228.348	-1.30727	0.150765	8.67094	4.28572e-18	5.51347e-16
AT1G18620	1841.18	-1.30626	0.229868	5.68265	1.32626e-08	2.98728e-07
AT3G13840	6.01869	-1.30416	0.379538	3.43618	0.000589982	0.00355033
AT2G13430	4.70475	-1.30146	0.377021	3.45196	0.000556528	0.00337227
AT1G64720	32947.3	-1.30091	0.137726	9.44564	3.53224e-21	7.38422e-19
AT4G17030	98.7135	-1.29922	0.321714	4.03844	5.38084e-05	0.00045507
AT4G03190	117.869	-1.29814	0.249213	5.20895	1.89914e-07	3.22179e-06
AT4G21510	33.1908	-1.29764	0.320263	4.0518	5.0826e-05	0.000433423
AT4G04830	571.571	-1.29759	0.213099	6.08912	1.13536e-09	3.16906e-08
AT1G06640	919.471	-1.29594	0.313255	4.13702	3.51851e-05	0.000314354
AT2G36770	12.2711	-1.29567	0.368129	3.5196	0.000432199	0.0027259
AT4G28250	861.014	-1.2952	0.172348	7.51498	5.69189e-14	3.47205e-12
AT4G23400	1935.67	-1.29283	0.140782	9.18322	4.1838e-20	7.30127e-18
AT5G65320	5.8048	-1.29101	0.378077	3.41469	0.000638553	0.00380496
AT5G16370	354.542	-1.28943	0.184686	6.98174	2.91542e-12	1.34815e-10
AT5G64410	342.241	-1.28824	0.212165	6.0719	1.26409e-09	3.47998e-08
AT1G04280	167.52	-1.28584	0.254495	5.05251	4.36051e-07	6.68534e-06
AT1G23965	20.2388	-1.28188	0.376717	3.40277	0.000667061	0.00394555
ATMG01370	36.3994	-1.28036	0.270784	4.72833	2.26372e-06	2.83764e-05
AT4G27450	510.289	-1.27841	0.377595	3.38567	0.000710057	0.00414548
AT4G21320	29.7909	-1.27708	0.260976	4.89347	9.90731e-07	1.37219e-05
ATMG00040	10.1924	-1.27666	0.364462	3.50287	0.000460269	0.00286763
AT1G59960	132.179	-1.27584	0.205284	6.21503	5.13144e-10	1.55879e-08
AT5G57550	6.03671	-1.27555	0.376068	3.3918	0.000694363	0.0040651
AT3G26170	300.194	-1.27465	0.252194	5.05426	4.32065e-07	6.63944e-06
AT5G42610	8.48892	-1.27396	0.371961	3.425	0.000614805	0.00367778
AT4G25760	4.73104	-1.27378	0.375682	3.39058	0.000697439	0.00407835
AT3G10020	314.117	-1.27322	0.28831	4.41617	1.00466e-05	0.000105423
AT1G01110	38.6881	-1.27056	0.319597	3.97551	7.02297e-05	0.000572943
AT1G71140	270.075	-1.26877	0.184906	6.86173	6.80321e-12	2.92991e-10
AT1G22550	45.579	-1.26874	0.271823	4.66752	3.04854e-06	3.70122e-05
AT3G13980	67.9689	-1.26868	0.248221	5.11109	3.20302e-07	5.11795e-06
AT3G28857	11.1119	-1.26661	0.359822	3.52009	0.000431403	0.00272259
AT5G25280	1659.75	-1.2665	0.166275	7.61689	2.59858e-14	1.70428e-12
AT4G23320	42.7803	-1.26595	0.30819	4.10769	3.99644e-05	0.000351508
AT3G45680	48.2018	-1.26485	0.285691	4.42733	9.54078e-06	0.000100723
AT4G30270	198.823	-1.26459	0.306287	4.12879	3.6468e-05	0.000324413
AT3G59750	53.9363	-1.26428	0.329124	3.84136	0.000122354	0.000923129
AT2G34925	33.2606	-1.26406	0.300822	4.20203	2.64535e-05	0.000245792
AT5G00985	10.7152	-1.26295	0.363441	3.47499	0.000510874	0.00313156
AT2G43375	13.0554	-1.26196	0.344466	3.66351	0.000248785	0.00170231
AT4G28270	376.093	-1.25926	0.213263	5.90471	3.53275e-09	8.8073e-08
AT1G66350	110.013	-1.25754	0.246282	5.10611	3.28856e-07	5.2255e-06
AT4G32280	63.7649	-1.25212	0.363992	3.43997	0.000581787	0.00350627
ENSRNA049493835	9.10066	-1.24753	0.375946	3.31839	0.000905389	0.00507407
AT5G47500	51.5657	-1.24676	0.366787	3.39914	0.000675985	0.00398485
AT3G09780	21.1541	-1.24213	0.29773	4.17201	3.01927e-05	0.000275176
AT5G48470	305.784	-1.24087	0.230685	5.37907	7.48729e-08	1.392e-06
AT5G03355	9.13715	-1.24001	0.37266	3.32745	0.000876434	0.00493212
AT3G28345	63.1882	-1.23918	0.277883	4.45936	8.22029e-06	8.8268e-05
AT5G02515	284.307	-1.23823	0.17704	6.99409	2.66986e-12	1.24319e-10
AT5G03150	35.9213	-1.23732	0.357292	3.46306	0.000534063	0.00325878
AT3G52060	559.676	-1.237	0.156331	7.91273	2.51801e-15	2.02136e-13
AT3G20660	21.2792	-1.2367	0.31665	3.90557	9.40047e-05	0.000737522
AT3G55290	48.1758	-1.23555	0.273567	4.51644	6.2887e-06	6.996e-05
AT4G36520	509.323	-1.23536	0.14093	8.76579	1.85477e-18	2.49821e-16
AT4G13260	45.1212	-1.23521	0.274598	4.49826	6.85112e-06	7.55053e-05
AT4G29770	6.92324	-1.23343	0.37525	3.28696	0.00101277	0.005564
AT1G25275	629.783	-1.23225	0.154426	7.97957	1.46839e-15	1.21773e-13
AT3G19850	452.48	-1.22925	0.209446	5.86908	4.38213e-09	1.06859e-07
AT5G64120	99.2163	-1.2288	0.375775	3.27003	0.00107534	0.00586283
AT1G19960	948.152	-1.22797	0.229988	5.3393	9.33062e-08	1.70078e-06
AT1G48480	510.004	-1.22428	0.156315	7.83213	4.79678e-15	3.6743e-13
AT5G47220	223.056	-1.22384	0.272117	4.49749	6.8762e-06	7.574e-05
AT4G08950	40.0446	-1.2227	0.334939	3.65051	0.000261719	0.00177507
AT2G27190	442.668	-1.22249	0.158975	7.68988	1.47276e-14	1.0192e-12
AT5G37670	19.0292	-1.21976	0.299513	4.07247	4.65169e-05	0.000401526
AT2G25790	54.7926	-1.21961	0.277152	4.4005	1.08002e-05	0.000112131
AT5G25190	142.502	-1.21884	0.380299	3.20495	0.00135084	0.0071136
AT1G65590	829.259	-1.21611	0.125776	9.66882	4.09049e-22	1.05246e-19
AT1G76610	22.3303	-1.21539	0.294397	4.1284	3.65296e-05	0.000324674
AT5G64620	52.7197	-1.21313	0.262568	4.62026	3.83253e-06	4.53508e-05
AT3G19710	3135.64	-1.21292	0.2259	5.36929	7.90464e-08	1.4621e-06
AT1G53440	357.076	-1.21215	0.186195	6.5101	7.51025e-11	2.73545e-09
AT1G67910	63.4788	-1.21129	0.283882	4.26686	1.98242e-05	0.000192199
AT5G49360	1077.7	-1.21122	0.348182	3.47869	0.000503866	0.00309617
AT5G46440	43.1002	-1.21059	0.261447	4.63035	3.6504e-06	4.35378e-05
AT4G20230	34.9181	-1.21014	0.310748	3.89426	9.84991e-05	0.000766787
AT5G56840	16.1361	-1.21002	0.334593	3.61639	0.000298742	0.00198788
AT4G32290	125.253	-1.20746	0.163632	7.37916	1.59295e-13	9.16017e-12
AT1G65486	87.0369	-1.20643	0.253882	4.75195	2.01468e-06	2.56389e-05
AT2G01340	45.7464	-1.20348	0.302521	3.97818	6.94435e-05	0.000567221
AT3G15630	20.414	-1.20194	0.36874	3.25959	0.00111572	0.00605501
AT5G16190	108.6	-1.2014	0.206979	5.80448	6.45671e-09	1.53349e-07
AT4G20260	1284.37	-1.20071	0.230324	5.21314	1.85674e-07	3.15788e-06
AT5G16170	15.6561	-1.20069	0.361136	3.32477	0.000884911	0.0049718
AT5G14730	27.1158	-1.20049	0.314255	3.8201	0.000133395	0.000992994
AT1G02300	299.173	-1.20035	0.211752	5.66869	1.43897e-08	3.19102e-07
AT4G17680	61.6201	-1.20025	0.208435	5.75841	8.49101e-09	1.97001e-07
AT1G54200	107.37	-1.19983	0.229181	5.2353	1.64719e-07	2.85224e-06
AT1G05420	8.56808	-1.19945	0.357232	3.35762	0.000786176	0.00451826
AT1G09753	4.1451	-1.1966	0.37917	3.15583	0.00160044	0.0082043
AT1G77020	30.4281	-1.19607	0.306735	3.89935	9.64507e-05	0.000753179
AT2G27830	147.818	-1.19567	0.282577	4.23131	2.32331e-05	0.000220041
AT1G22530	120.118	-1.19533	0.229871	5.20001	1.99278e-07	3.35795e-06
AT5G57685	46.122	-1.19472	0.276845	4.31549	1.59251e-05	0.000158454
AT3G47380	21.4135	-1.19408	0.370775	3.22049	0.00127972	0.00681059
AT2G42870	24.8968	-1.19334	0.37656	3.16905	0.0015294	0.00790865
AT3G50770	27.8578	-1.19303	0.352855	3.38107	0.000722044	0.00420386
AT2G20560	163.817	-1.19266	0.232077	5.13909	2.76075e-07	4.48635e-06
AT3G28220	2169.19	-1.19183	0.380497	3.13231	0.00173435	0.00878292
AT2G46710	658.128	-1.19111	0.271063	4.39423	1.11165e-05	0.000115118
AT5G52882	151.41	-1.191	0.229595	5.1874	2.13245e-07	3.56932e-06
AT5G06870	612.328	-1.19068	0.242422	4.9116	9.03377e-07	1.2696e-05
AT5G60130	8.84212	-1.1898	0.356794	3.33468	0.000853962	0.00483949
AT1G03457	22.9402	-1.18853	0.280451	4.23793	2.25595e-05	0.000214979
AT3G55240	788.185	-1.18843	0.22568	5.26599	1.39434e-07	2.45009e-06
AT1G74310	170.824	-1.18843	0.218945	5.42796	5.70002e-08	1.09391e-06
AT5G48570	415.188	-1.18826	0.24869	4.77807	1.76984e-06	2.29007e-05
AT1G55380	15.5994	-1.18801	0.318149	3.73413	0.000188361	0.00134193
AT1G56165	9.40161	-1.18732	0.365225	3.25092	0.00115031	0.00621415
AT4G18970	1178.07	-1.18659	0.256502	4.62604	3.72717e-06	4.43394e-05
AT3G01490	480.935	-1.18642	0.229995	5.15846	2.48985e-07	4.09581e-06
AT3G15770	237.776	-1.18597	0.142105	8.3457	7.07951e-17	7.10394e-15
AT1G50110	28.7065	-1.18225	0.330856	3.57332	0.000352489	0.00228861
AT5G10170	577.716	-1.18084	0.13118	9.00174	2.22169e-19	3.5108e-17
AT1G17460	48.9871	-1.18074	0.237534	4.97082	6.66694e-07	9.73082e-06
AT3G27510	3.34254	-1.18067	0.372867	3.16646	0.00154308	0.00796711
AT5G51440	46.3638	-1.17884	0.333941	3.53007	0.000415445	0.00264182
AT5G17330	48.8196	-1.17873	0.322322	3.657	0.000255181	0.00173955
AT2G46970	9.42109	-1.17815	0.367303	3.20757	0.00133861	0.00705847
AT2G37060	62.183	-1.17779	0.200267	5.8811	4.07561e-09	1.00483e-07
AT2G42570	35.366	-1.17565	0.333543	3.52474	0.000423897	0.00268679
AT2G28950	1168.95	-1.17558	0.197137	5.96325	2.47267e-09	6.43632e-08
AT1G29450	153.277	-1.175	0.287209	4.09108	4.29376e-05	0.000374076
AT3G14170	125.638	-1.17391	0.191922	6.1166	9.55922e-10	2.71349e-08
AT1G05035	9.6538	-1.1737	0.363628	3.22776	0.00124765	0.00667177
AT2G36080	20.0228	-1.17341	0.349631	3.35613	0.000790422	0.00453617
AT1G33811	350.377	-1.17249	0.271607	4.31686	1.58266e-05	0.000157943
AT4G31890	89.6391	-1.17049	0.190741	6.13654	8.43368e-10	2.42139e-08
AT5G01240	724.796	-1.17036	0.156058	7.4995	6.40615e-14	3.87244e-12
AT3G49620	28.8577	-1.1695	0.34993	3.34209	0.000831507	0.00473435
AT2G16380	367.014	-1.16929	0.15524	7.53216	4.99088e-14	3.08191e-12
AT4G16400	19.4486	-1.16796	0.316572	3.6894	0.000224783	0.00155772
AT1G77990	181.318	-1.16795	0.162083	7.20588	5.76686e-13	3.03767e-11
AT5G18030	199.948	-1.16733	0.253902	4.59758	4.27422e-06	4.9988e-05
AT1G16390	44.7852	-1.16733	0.344026	3.39315	0.000690935	0.00405122
AT1G68840	481.216	-1.16712	0.243355	4.79597	1.61886e-06	2.13042e-05
AT3G09260	82.6479	-1.1661	0.350706	3.32499	0.000884211	0.00497065
ENSRNA049493684	7.03878	-1.16546	0.36722	3.17373	0.00150495	0.00780033
AT5G27360	370.582	-1.16506	0.122589	9.50383	2.02318e-21	4.51146e-19
AT3G04210	1091.52	-1.16505	0.229472	5.07711	3.83225e-07	5.98984e-06
AT3G63210	235.101	-1.1649	0.148574	7.84055	4.48593e-15	3.47599e-13
AT5G18065	29.444	-1.16392	0.277564	4.19334	2.7488e-05	0.000253986
AT4G15440	190.792	-1.16278	0.292589	3.9741	7.06453e-05	0.000575631
AT2G26530	182.766	-1.16154	0.235672	4.92863	8.28093e-07	1.17698e-05
AT4G23870	50.8974	-1.15766	0.282596	4.09652	4.19405e-05	0.000366436
AT2G30930	179.608	-1.15705	0.21486	5.38513	7.23928e-08	1.34898e-06
AT4G17470	170.03	-1.15591	0.36684	3.151	0.00162715	0.00832618
AT3G14780	28.497	-1.15506	0.302155	3.82275	0.000131971	0.000983848
AT5G05320	8.81523	-1.15492	0.378473	3.05153	0.0022768	0.010976
AT5G55970	165.204	-1.15462	0.276517	4.17557	2.97237e-05	0.000271271
AT1G04980	98.1513	-1.1545	0.226055	5.10715	3.27053e-07	5.2051e-06
AT5G25980	20620.9	-1.1542	0.327052	3.52911	0.000416959	0.0026506
AT3G51340	54.0704	-1.15372	0.278535	4.14212	3.44118e-05	0.000307621
AT1G11670	125.357	-1.15366	0.233732	4.93583	7.98114e-07	1.13921e-05
AT2G37390	8.36949	-1.15355	0.373597	3.08768	0.00201725	0.00992261
AT1G30135	3.6854	-1.15282	0.368942	3.12466	0.0017801	0.00897383
AT3G50890	46.2049	-1.1526	0.258094	4.46583	7.97572e-06	8.59639e-05
AT4G13410	149.932	-1.15234	0.380464	3.02878	0.00245541	0.0117021
AT5G03553	6.82753	-1.15233	0.380173	3.03108	0.0024368	0.0116245
AT1G63800	748.766	-1.15158	0.206604	5.57387	2.49139e-08	5.2083e-07
AT1G70260	58.7519	-1.15002	0.337396	3.40853	0.000653136	0.0038746
AT3G42570	3.50117	-1.14972	0.377499	3.04561	0.00232206	0.0111674
AT3G04181	8.34025	-1.14961	0.359561	3.19726	0.00138738	0.00727361
AT5G65390	8.10664	-1.1487	0.38047	3.01917	0.00253466	0.0120341
AT3G45940	28.0473	-1.14753	0.279316	4.10834	3.98519e-05	0.000350784
AT5G47720	245.494	-1.1469	0.137055	8.36822	5.84945e-17	6.05117e-15
AT5G16030	2747.94	-1.14679	0.181056	6.33386	2.391e-10	7.67759e-09
AT4G23720	7.9208	-1.14556	0.364926	3.13915	0.00169436	0.00860703
AT2G23690	16.5798	-1.14552	0.321967	3.55788	0.000373859	0.00241021
AT4G01680	19.3425	-1.14512	0.312201	3.66788	0.000244568	0.00167918
AT2G45050	22.7666	-1.14417	0.306167	3.73709	0.000186166	0.00132959
AT4G29740	140.298	-1.14334	0.271107	4.21731	2.47233e-05	0.000232399
AT5G02760	341.736	-1.14281	0.380308	3.00496	0.00265614	0.0125102
AT1G18990	14.0479	-1.14251	0.355794	3.21117	0.00132196	0.00699086
AT1G14860	3.66493	-1.14216	0.375463	3.042	0.00235011	0.0112867
AT1G69530	5922.03	-1.14113	0.203106	5.61838	1.92753e-08	4.11527e-07
AT1G15175	85.97	-1.14031	0.210926	5.40621	6.43712e-08	1.21416e-06
AT5G52120	185.377	-1.14021	0.189876	6.00501	1.91319e-09	5.07881e-08
AT5G50750	5.3237	-1.13969	0.380237	2.99731	0.00272377	0.0127599
AT4G01750	23.8025	-1.13959	0.292045	3.90209	9.53665e-05	0.000746455
AT5G39020	122.727	-1.1394	0.216638	5.2595	1.4445e-07	2.52524e-06
AT4G03960	75.5506	-1.13866	0.179844	6.33138	2.42984e-10	7.78984e-09
AT5G07500	3.22412	-1.13696	0.3713	3.06211	0.00219786	0.0106506
AT3G10520	1128.93	-1.13684	0.11999	9.4745	2.68045e-21	5.7843e-19
AT1G80050	324.613	-1.13655	0.224188	5.06964	3.98572e-07	6.19593e-06
AT2G25200	135.071	-1.13654	0.275993	4.118	3.82173e-05	0.000338027
AT5G07660	32.6199	-1.13624	0.274657	4.13694	3.51963e-05	0.000314354
AT5G16340	25.8145	-1.13579	0.28777	3.94686	7.91827e-05	0.000634632
AT1G15380	38.6231	-1.13579	0.370667	3.06416	0.00218279	0.010594
AT4G31050	112.19	-1.13574	0.251477	4.51629	6.29321e-06	6.99714e-05
AT1G09460	6.82434	-1.13534	0.375628	3.0225	0.00250698	0.0119168
AT5G13790	7.83978	-1.13521	0.373197	3.04184	0.00235134	0.0112892
AT5G47160	7.69116	-1.13512	0.365038	3.10959	0.00187349	0.00935765
AT5G38010	11.4668	-1.13381	0.341454	3.32052	0.000898505	0.00504112
AT5G58787	182.439	-1.13356	0.178715	6.34283	2.25581e-10	7.33742e-09
AT5G64800	15.5731	-1.13293	0.335546	3.37638	0.000734462	0.00425763
AT3G51450	327.948	-1.13175	0.217059	5.21401	1.84803e-07	3.1484e-06
AT2G25270	62.536	-1.13171	0.248308	4.55768	5.17227e-06	5.88448e-05
AT2G17705	78.5367	-1.13141	0.183899	6.15234	7.63478e-10	2.21458e-08
AT5G57785	6.84082	-1.13039	0.38052	2.97063	0.0029719	0.0137205
AT1G27030	272.135	-1.13031	0.196012	5.76651	8.0929e-09	1.89517e-07
AT1G76310	18.6757	-1.13018	0.299151	3.77795	0.000158122	0.00115185
AT1G22340	15.9001	-1.12963	0.342337	3.29976	0.00096767	0.00535876
AT2G38120	1006.47	-1.12939	0.16957	6.66033	2.73219e-11	1.0565e-09
AT1G17745	295.651	-1.12886	0.189278	5.96407	2.46037e-09	6.41263e-08
AT2G37025	34.1633	-1.12611	0.270373	4.16502	3.11326e-05	0.000282332
AT2G33020	10.0058	-1.12576	0.356254	3.15998	0.00157778	0.00810246
AT3G50450	9.46976	-1.12509	0.372294	3.02206	0.00251062	0.0119284
AT1G14250	3873.39	-1.12498	0.368317	3.05438	0.00225523	0.0108848
AT5G09530	40.1658	-1.12416	0.304307	3.69417	0.000220604	0.00153513
AT1G08300	82.3289	-1.12363	0.235782	4.76556	1.88332e-06	2.42129e-05
AT3G01710	26.1439	-1.12351	0.319312	3.51852	0.000433964	0.00273531
AT1G21830	111.94	-1.12343	0.27518	4.08252	4.45497e-05	0.000386374
AT5G28237	3.84265	-1.12282	0.374447	2.99861	0.00271213	0.0127143
AT4G32780	9.10841	-1.12106	0.379556	2.95361	0.00314077	0.0143745
AT3G27730	3.53843	-1.12071	0.375393	2.98543	0.00283184	0.013177
AT1G65370	381.241	-1.1205	0.179389	6.24616	4.20653e-10	1.29084e-08
AT5G44680	860.309	-1.12034	0.226744	4.94099	7.77285e-07	1.114e-05
AT3G16180	63.3839	-1.11998	0.251652	4.45049	8.56748e-06	9.12389e-05
AT4G01330	797.799	-1.11969	0.144902	7.72726	1.09883e-14	7.8478e-13
AT1G13750	177.27	-1.11938	0.267109	4.19072	2.78067e-05	0.000256458
AT1G57990	134.612	-1.11895	0.249255	4.4892	7.14926e-06	7.83608e-05
AT3G14630	24.807	-1.11864	0.357311	3.13071	0.00174384	0.00882205
AT1G29465	33.9039	-1.1176	0.266744	4.18979	2.79211e-05	0.000257158
AT1G80280	33.3238	-1.11631	0.31844	3.50557	0.000455633	0.00284331
AT1G80440	534.725	-1.11386	0.367102	3.03419	0.00241183	0.0115245
AT5G51750	202.261	-1.11356	0.273522	4.07119	4.67745e-05	0.000403576
AT4G23130	234.922	-1.11214	0.262328	4.23951	2.24011e-05	0.000213877
AT1G52190	1343.48	-1.11179	0.363784	3.05619	0.0022417	0.0108259
AT4G35100	2460.53	-1.11134	0.174218	6.37902	1.78219e-10	5.99108e-09
AT2G35150	23.4477	-1.11086	0.343871	3.23044	0.00123599	0.00661999
AT3G55390	14.8353	-1.11027	0.325531	3.41065	0.000648093	0.00385152
AT4G16780	221.014	-1.10682	0.178565	6.19841	5.70373e-10	1.70086e-08
AT4G14140	9.13381	-1.10558	0.378346	2.92215	0.00347624	0.0155504
AT5G42680	81.7781	-1.10557	0.223079	4.95596	7.19724e-07	1.04215e-05
AT3G32980	45.5231	-1.10541	0.327263	3.37774	0.000730847	0.00424403
ENSRNA049495577	21.7346	-1.10527	0.295853	3.73588	0.000187061	0.00133409
AT4G05190	35.465	-1.10501	0.270278	4.08844	4.34277e-05	0.000377949
AT3G50470	22.3978	-1.10457	0.327066	3.3772	0.000732267	0.00424859
AT5G66330	40.3149	-1.10451	0.276579	3.99347	6.51144e-05	0.000535786
AT2G42247	5.64359	-1.10388	0.380359	2.9022	0.00370551	0.0163861
AT3G13277	48.7864	-1.10269	0.30666	3.59581	0.000323389	0.0021293
AT3G12500	34.5393	-1.10165	0.260296	4.23227	2.3134e-05	0.000219472
AT4G15610	11.9874	-1.1006	0.377204	2.91778	0.00352531	0.0157291
AT5G64900	22.3152	-1.0996	0.283905	3.87314	0.000107443	0.000829092
AT1G64170	20.5774	-1.09955	0.365454	3.00871	0.00262359	0.0123656
AT1G23790	8.16254	-1.09952	0.378179	2.90741	0.00364435	0.0161596
AT5G14360	16.5674	-1.09892	0.365132	3.00967	0.00261533	0.0123354
AT2G44480	4.22552	-1.09809	0.362469	3.02948	0.00244973	0.0116806
AT3G01070	4.79912	-1.09706	0.379838	2.88824	0.00387402	0.0170089
AT1G23870	135.415	-1.09696	0.280905	3.90511	9.41834e-05	0.000738484
AT1G11350	515.776	-1.09515	0.131555	8.32466	8.45725e-17	8.36101e-15
AT4G21650	772.241	-1.09468	0.252722	4.33157	1.48049e-05	0.000149232
AT1G22500	22.4675	-1.09468	0.362605	3.01892	0.00253677	0.0120384
AT3G16860	19.4107	-1.09336	0.298613	3.66148	0.000250766	0.00171469
AT1G72210	10.0007	-1.09258	0.370668	2.9476	0.00320248	0.0145771
AT5G23280	500.71	-1.09104	0.122084	8.93677	4.00708e-19	6.18601e-17
AT5G44390	53.0926	-1.09032	0.274717	3.96887	7.2215e-05	0.000586517
AT3G58120	166.457	-1.09	0.363833	2.99589	0.00273645	0.0128103
AT1G54030	493.977	-1.08893	0.158677	6.8626	6.76185e-12	2.91836e-10
AT5G64190	14.6075	-1.08842	0.378312	2.87705	0.00401418	0.0175208
AT3G14380	12.916	-1.08823	0.372356	2.92255	0.00347182	0.0155423
AT5G22608	54.9822	-1.08806	0.223501	4.86825	1.12591e-06	1.53459e-05
AT1G68862	23.0186	-1.088	0.325153	3.34613	0.000819479	0.00467618
AT2G25060	49.6949	-1.08728	0.291634	3.72824	0.000192821	0.00137078
AT1G32928	16.6773	-1.08719	0.313874	3.46378	0.000532642	0.00325109
AT4G27870	472.231	-1.08717	0.148057	7.34292	2.08977e-13	1.17808e-11
AT1G14205	43.996	-1.08619	0.271176	4.00547	6.18934e-05	0.000513705
AT4G09460	99.3461	-1.08589	0.250226	4.33963	1.4272e-05	0.000144418
AT1G80370	13.3934	-1.08557	0.364715	2.97649	0.0029157	0.0134974
AT2G15042	225.296	-1.08494	0.261696	4.14582	3.38602e-05	0.000303096
AT5G20790	23.6343	-1.08343	0.317678	3.41047	0.00064852	0.00385274
AT1G71870	37.1373	-1.0834	0.242431	4.46888	7.86289e-06	8.50217e-05
AT2G20562	17.4555	-1.08337	0.324846	3.33502	0.000852928	0.00483543
AT1G12030	11.6854	-1.08314	0.360879	3.00139	0.00268748	0.0126193
AT1G23020	399.645	-1.08306	0.346901	3.12209	0.00179573	0.00904128
AT4G35630	155.365	-1.08302	0.198285	5.46196	4.70899e-08	9.20202e-07
ATMG00690	28.8326	-1.08302	0.289604	3.73968	0.000184257	0.00131883
AT5G02200	7.5508	-1.08225	0.373052	2.90108	0.00371876	0.0164351
AT5G63180	1927.78	-1.07827	0.208999	5.1592	2.48013e-07	4.08316e-06
AT1G68560	4257.37	-1.078	0.128854	8.36602	5.95954e-17	6.13344e-15
AT3G44716	20.5218	-1.07768	0.294688	3.65703	0.000255151	0.00173955
AT5G15830	53.0974	-1.07764	0.267924	4.0222	5.76581e-05	0.000482059
AT2G38870	408.813	-1.07737	0.1894	5.68833	1.2829e-08	2.90265e-07
AT2G41990	4.73476	-1.07606	0.372237	2.89078	0.00384282	0.0169126
AT3G28060	7.32646	-1.07583	0.374848	2.87005	0.00410405	0.0178215
AT3G12520	142.715	-1.07518	0.139808	7.69044	1.46626e-14	1.01822e-12
AT3G50210	106.588	-1.07467	0.183731	5.84911	4.94203e-09	1.1964e-07
AT1G03820	166.631	-1.07442	0.236818	4.53691	5.7085e-06	6.41096e-05
AT5G63190	154.441	-1.0744	0.256797	4.18384	2.86624e-05	0.000263488
AT3G49790	106.084	-1.07436	0.271953	3.95054	7.79751e-05	0.000626203
AT3G02170	497.857	-1.07435	0.215434	4.98689	6.13579e-07	9.04105e-06
AT1G35260	9.80606	-1.0743	0.360395	2.9809	0.002874	0.0133298
ATMG00160	29.0738	-1.07287	0.25955	4.13359	3.57142e-05	0.000318272
AT1G04187	21.6302	-1.07196	0.325998	3.28823	0.0010082	0.00554194
AT5G12900	192.945	-1.07169	0.148876	7.19853	6.08661e-13	3.18935e-11
AT4G27370	173.644	-1.07089	0.170412	6.28411	3.29737e-10	1.03076e-08
AT1G77885	84.9767	-1.07025	0.257618	4.15439	3.26161e-05	0.000293267
AT1G50830	20.0106	-1.07012	0.372013	2.87657	0.00402017	0.0175355
AT4G36930	24.1967	-1.06966	0.272519	3.92508	8.67016e-05	0.000686938
AT3G53190	195.892	-1.06959	0.247547	4.32075	1.55501e-05	0.000155648
AT4G04460	23.6838	-1.06936	0.305017	3.50588	0.000455093	0.00284083
AT3G53370	101.865	-1.06832	0.212353	5.03085	4.88299e-07	7.37372e-06
AT4G15765	79.5486	-1.0665	0.302285	3.52812	0.000418528	0.00265889
AT5G45850	17.3226	-1.06619	0.352782	3.02224	0.00250914	0.0119242
AT2G43800	111.342	-1.06443	0.233233	4.56382	5.02315e-06	5.74413e-05
AT2G45180	11674.3	-1.06425	0.122567	8.68297	3.85567e-18	5.02464e-16
AT5G51850	28.6903	-1.06366	0.365526	2.90994	0.00361498	0.0160542
AT1G03495	116.959	-1.06351	0.282178	3.76894	0.000163939	0.00118862
AT1G58370	139.334	-1.06337	0.249955	4.25427	2.09735e-05	0.000201976
AT2G21710	125.374	-1.06326	0.156691	6.78573	1.15504e-11	4.76964e-10
AT5G42840	6.11265	-1.06197	0.376708	2.81909	0.00481603	0.0203351
AT2G22860	13.0008	-1.06183	0.37124	2.86022	0.00423343	0.0183026
AT5G43380	22.7226	-1.06118	0.281705	3.76699	0.000165231	0.00119625
AT3G10190	47.23	-1.06057	0.21608	4.90824	9.18954e-07	1.28748e-05
AT1G33590	1488.44	-1.05968	0.142602	7.431	1.07782e-13	6.288e-12
AT4G09060	3.15773	-1.05938	0.374757	2.82683	0.00470114	0.0199213
AT3G13680	4.71762	-1.05932	0.380034	2.78743	0.00531271	0.0220884
AT2G30600	1237.21	-1.05866	0.256725	4.12369	3.72844e-05	0.000330504
AT5G61520	97.077	-1.05828	0.292587	3.61699	0.000298051	0.00198526
AT2G17550	129.648	-1.0582	0.196158	5.39461	6.86739e-08	1.28805e-06
AT3G08670	314.089	-1.05674	0.154243	6.85115	7.32606e-12	3.11935e-10
AT5G19100	12.9298	-1.05568	0.360047	2.93208	0.00336704	0.0151713
AT1G66480	25.1861	-1.0549	0.300715	3.50797	0.000451539	0.00282391
AT2G02020	317.553	-1.05367	0.12732	8.27575	1.27654e-16	1.23763e-14
AT1G36940	11.4176	-1.05218	0.360236	2.92082	0.00349113	0.0156009
AT3G56060	472.22	-1.05132	0.137427	7.64997	2.01022e-14	1.34261e-12
AT2G40640	68.5423	-1.05057	0.201192	5.22173	1.77257e-07	3.04049e-06
AT1G59660	105.62	-1.04985	0.173323	6.0572	1.38511e-09	3.78201e-08
AT3G14210	26682.9	-1.04941	0.171747	6.11023	9.94878e-10	2.81611e-08
AT1G12160	9.53901	-1.04922	0.375876	2.79141	0.00524784	0.0218731
AT5G39865	11.8398	-1.04846	0.330748	3.16998	0.00152451	0.00788945
AT5G19470	138.299	-1.0479	0.377187	2.7782	0.00546616	0.0225907
AT5G15210	343.313	-1.0478	0.142268	7.36503	1.77103e-13	1.01262e-11
AT2G41250	565.823	-1.04565	0.140117	7.46265	8.48017e-14	5.02031e-12
AT3G28150	62.2106	-1.04295	0.21423	4.86836	1.1253e-06	1.53459e-05
AT5G23100	102.528	-1.04275	0.162798	6.40516	1.50216e-10	5.1445e-09
AT1G71110	50.1	-1.04177	0.219855	4.73847	2.15343e-06	2.71124e-05
AT3G43670	360.185	-1.0413	0.212779	4.89382	9.88998e-07	1.37073e-05
AT3G62860	98.9691	-1.03927	0.191534	5.42605	5.76156e-08	1.10228e-06
AT1G52040	891.213	-1.03912	0.340548	3.05131	0.00227846	0.0109765
AT3G47160	186.605	-1.03714	0.240422	4.31383	1.60447e-05	0.000159406
AT3G50740	661.57	-1.03618	0.219345	4.72396	2.31296e-06	2.88495e-05
AT2G22970	374.131	-1.03472	0.184706	5.60197	2.11926e-08	4.50069e-07
AT2G40610	2455.75	-1.03431	0.362949	2.84975	0.00437541	0.0188232
AT1G21270	1466.88	-1.03332	0.193077	5.35183	8.7071e-08	1.60314e-06
AT3G26690	31.0962	-1.03148	0.287789	3.58416	0.00033816	0.00221348
AT2G01510	19.3797	-1.03138	0.316193	3.26186	0.00110683	0.00601917
AT1G52030	184.11	-1.0299	0.348464	2.95554	0.00312118	0.0142881
AT5G48360	168.432	-1.02955	0.199409	5.16302	2.42992e-07	4.00857e-06
AT2G30432	82.7895	-1.02916	0.200281	5.1386	2.76796e-07	4.49436e-06
AT1G32090	167.278	-1.02843	0.165857	6.20073	5.62018e-10	1.67844e-08
AT2G02990	15.789	-1.02812	0.36022	2.85415	0.00431527	0.0186123
AT1G33770	66.1235	-1.02802	0.279846	3.67351	0.000239244	0.00164487
AT1G11580	927.393	-1.02749	0.152764	6.72602	1.74368e-11	6.99878e-10
AT2G28500	22.5905	-1.02721	0.28677	3.58201	0.000340967	0.00222605
AT2G32010	446.894	-1.02674	0.130733	7.85366	4.04068e-15	3.14312e-13
AT1G18710	82.497	-1.02614	0.328037	3.12811	0.00175933	0.00888701
AT2G43530	735.908	-1.02521	0.347394	2.95113	0.00316612	0.0144608
AT1G12780	537.473	-1.02492	0.203622	5.03344	4.81748e-07	7.29125e-06
AT2G20590	7.84621	-1.02459	0.360804	2.83974	0.00451506	0.0192998
AT5G01075	41.311	-1.02309	0.267238	3.82839	0.000128982	0.000964797
AT3G22275	3.27331	-1.02074	0.365805	2.7904	0.00526436	0.0219283
AT4G38860	1034.82	-1.0196	0.12742	8.00189	1.22521e-15	1.04189e-13
AT3G59010	127.634	-1.01944	0.185415	5.49813	3.8383e-08	7.66476e-07
AT4G15760	271.646	-1.01916	0.22261	4.57824	4.68895e-06	5.40198e-05
AT1G62800	198.401	-1.0188	0.217249	4.68955	2.73802e-06	3.35876e-05
AT4G17500	97.7555	-1.01833	0.233009	4.37033	1.24061e-05	0.000126836
AT4G23340	4.11631	-1.01832	0.372055	2.73702	0.00619981	0.0250249
AT4G36280	155.769	-1.01731	0.173483	5.86405	4.51721e-09	1.09886e-07
AT1G08180	30.9676	-1.01632	0.252009	4.03287	5.50988e-05	0.000464587
AT4G18205	230.591	-1.01571	0.188208	5.39674	6.7864e-08	1.27405e-06
AT1G55360	1145.07	-1.01499	0.156902	6.46896	9.86778e-11	3.53636e-09
AT4G34770	14.7939	-1.01461	0.379762	2.6717	0.00754677	0.0294433
ATMG00630	4.19893	-1.01308	0.364958	2.77589	0.00550502	0.0227139
AT5G04780	39.2337	-1.01235	0.230537	4.39127	1.12689e-05	0.000116455
AT4G27950	11.4851	-1.01211	0.353716	2.86138	0.00421807	0.0182441
AT3G42800	7.80985	-1.01207	0.379941	2.66376	0.0077272	0.030013
AT4G21870	91.4898	-1.01139	0.2146	4.71289	2.44225e-06	3.02927e-05
AT1G71400	15.1532	-1.01133	0.346577	2.91805	0.0035223	0.0157192
AT1G09480	9.39283	-1.01101	0.363477	2.78148	0.00541111	0.0224047
AT3G02640	43.4049	-1.01011	0.309772	3.26082	0.00111089	0.00603633
AT1G54740	234.424	-1.01	0.165572	6.10005	1.06037e-09	2.98047e-08
AT3G48580	18.2032	-1.00898	0.302953	3.33048	0.000866959	0.00489699
AT5G54380	300.235	-1.00849	0.124843	8.07806	6.58027e-16	5.8176e-14
AT1G13430	5.91949	-1.00825	0.375253	2.68686	0.00721279	0.0283386
AT5G10570	50.285	-1.00815	0.252356	3.99496	6.47044e-05	0.00053263
AT1G19510	36.6605	-1.00765	0.326426	3.08692	0.00202244	0.00994326
AT3G61950	41.9957	-1.00666	0.271743	3.70446	0.000211844	0.00148446
AT1G23850	42.3332	-1.00476	0.324995	3.09161	0.00199075	0.00982355
AT4G32950	8.00453	-1.00415	0.373597	2.68779	0.00719273	0.0282653
AT2G26515	40.7543	-1.00391	0.22082	4.54625	5.46091e-06	6.17436e-05
AT5G39520	4.23969	-1.00379	0.380388	2.63886	0.00831856	0.0318537
AT1G07350	807.708	-1.00299	0.168882	5.939	2.86758e-09	7.28474e-08
AT1G17240	19.7977	-1.00209	0.30759	3.25787	0.00112253	0.00608703
AT1G21060	175.083	-1.00198	0.17725	5.65289	1.57769e-08	3.4491e-07
AT2G07638	22.0418	-1.00187	0.332964	3.00894	0.00262157	0.012359
AT4G23420	27.5233	-1.00137	0.303305	3.30152	0.000961619	0.00533663
AT1G72530	37.7501	-0.999125	0.245122	4.07603	4.58107e-05	0.000395941
AT5G39860	270.91	-0.999121	0.246603	4.05154	5.08816e-05	0.000433423
AT4G28790	4.93633	-0.998893	0.38022	2.62714	0.00861047	0.0327652
AT1G09400	9.27504	-0.998389	0.349716	2.85486	0.00430559	0.0185786
AT2G01420	1103.89	-0.998289	0.154083	6.47891	9.239e-11	3.32289e-09
AT1G34355	10.8537	-0.99805	0.341694	2.92089	0.0034903	0.0156006
AT1G18250	55.2177	-0.997238	0.249019	4.00466	6.21066e-05	0.000515261
AT1G27210	500.014	-0.996464	0.193058	5.16147	2.45022e-07	4.03723e-06
AT4G09160	100.71	-0.996441	0.250793	3.97315	7.09274e-05	0.000577696
AT5G21960	3.57953	-0.99545	0.358597	2.77596	0.00550395	0.0227139
AT1G78490	326.076	-0.994869	0.142059	7.00322	2.50153e-12	1.18404e-10
AT4G28230	33.8465	-0.994731	0.321864	3.09053	0.00199801	0.00985208
AT4G03210	134.007	-0.994677	0.256363	3.87995	0.000104478	0.000808312
AT5G65970	24.9116	-0.994476	0.275114	3.61478	0.000300604	0.00199686
AT3G26220	143.644	-0.994021	0.236516	4.20276	2.63675e-05	0.000245315
AT1G21310	47.6686	-0.991935	0.372642	2.6619	0.00777016	0.0301592
AT2G34220	3.47418	-0.991496	0.368706	2.68912	0.00716397	0.0281799
AT2G32960	60.991	-0.991154	0.277623	3.57014	0.000356787	0.00231203
AT5G24780	1340.55	-0.990899	0.336575	2.94407	0.00323928	0.0147246
AT5G05390	7.1753	-0.990209	0.376933	2.62702	0.00861364	0.032771
AT5G24490	3451.55	-0.989696	0.154846	6.3915	1.64262e-10	5.57795e-09
AT3G23290	46.965	-0.989424	0.294534	3.35929	0.00078144	0.00449748
AT4G04955	439.397	-0.988697	0.1715	5.765	8.16597e-09	1.91006e-07
AT4G29690	4.53172	-0.988597	0.378023	2.61518	0.00891816	0.0336869
AT1G29460	169.871	-0.988337	0.220495	4.48235	7.38258e-06	8.05661e-05
AT5G50290	10.5365	-0.988176	0.352159	2.80605	0.00501533	0.0210526
AT5G36220	271.204	-0.987866	0.299098	3.30281	0.000957201	0.0053184
AT5G58500	8.26399	-0.986797	0.377987	2.61066	0.00903671	0.03407
AT2G34600	2.87336	-0.98655	0.353852	2.78803	0.00530302	0.0220573
AT2G35930	7.22947	-0.985991	0.380435	2.59175	0.00954901	0.0356936
AT2G17442	31.6016	-0.985569	0.259913	3.79193	0.000149484	0.00109689
AT3G13175	13.7317	-0.985497	0.367172	2.68402	0.00727423	0.0285464
AT2G06355	48.0716	-0.985153	0.330875	2.97742	0.00290684	0.0134692
AT4G22790	60.5333	-0.984397	0.256153	3.84301	0.000121537	0.000918344
AT1G47840	20.3169	-0.984009	0.312586	3.14796	0.00164415	0.00839175
AT1G56220	3154.94	-0.983722	0.228921	4.29722	1.72956e-05	0.00017015
AT3G29370	5.88505	-0.983484	0.347689	2.82863	0.00467474	0.0198513
AT1G73830	134.155	-0.983157	0.295537	3.32668	0.000878874	0.00494204
AT5G66610	58.3722	-0.982635	0.196099	5.01091	5.41742e-07	8.10151e-06
AT4G16260	16.7592	-0.98256	0.362923	2.70735	0.00678228	0.0269799
AT3G44050	30.9474	-0.982147	0.307514	3.19383	0.00140398	0.00734526
AT5G23020	7.46614	-0.981877	0.350717	2.79963	0.00511618	0.0214401
AT3G05150	2.94364	-0.981459	0.363664	2.6988	0.00695892	0.0275363
AT2G31110	161.366	-0.981251	0.170288	5.7623	8.29776e-09	1.93272e-07
AT1G15740	1185.54	-0.981226	0.208787	4.69964	2.60618e-06	3.2088e-05
AT1G22690	572.624	-0.980874	0.246493	3.97932	6.9113e-05	0.000564952
AT4G14380	8.48593	-0.98068	0.370875	2.64423	0.00818769	0.0314907
AT1G26440	262.23	-0.980566	0.140963	6.95617	3.49655e-12	1.59483e-10
AT5G24770	4596.48	-0.978762	0.362435	2.70052	0.00692313	0.0274315
AT1G06080	130.259	-0.97844	0.346364	2.82489	0.00472973	0.0200128
AT3G42670	134.668	-0.977981	0.19949	4.9024	9.4672e-07	1.32034e-05
AT4G16140	115.912	-0.977703	0.282465	3.46133	0.000537519	0.00327687
AT5G46330	440.916	-0.977364	0.229668	4.25554	2.08543e-05	0.000200924
AT4G30130	45.6079	-0.97595	0.249584	3.9103	9.21809e-05	0.000724913
AT3G11230	74.8913	-0.975708	0.197414	4.94244	7.71491e-07	1.10738e-05
AT3G20470	534.667	-0.975521	0.184088	5.2992	1.16311e-07	2.08975e-06
AT5G15580	205.556	-0.975252	0.247964	3.93304	8.38767e-05	0.00066825
AT1G04313	3.99931	-0.974754	0.380495	2.56181	0.0104128	0.0382389
AT4G36670	95.7914	-0.974521	0.337157	2.89041	0.00384744	0.0169185
AT3G45130	18.7416	-0.974486	0.373062	2.61213	0.00899811	0.0339378
AT1G22370	229.5	-0.974428	0.227482	4.28353	1.83948e-05	0.000179556
AT5G56040	266.387	-0.974145	0.126984	7.6714	1.70124e-14	1.17327e-12
AT4G00380	119.94	-0.973789	0.164859	5.90681	3.48791e-09	8.70633e-08
AT5G45070	6.18104	-0.972991	0.380482	2.55726	0.01055	0.0386364
AT5G07000	84.5721	-0.972828	0.214179	4.54211	5.56928e-06	6.28274e-05
AT3G30180	182.002	-0.972024	0.214791	4.52543	6.02718e-06	6.73119e-05
AT2G36400	32.7728	-0.971949	0.351034	2.76882	0.00562597	0.0230895
AT2G21200	14.424	-0.971767	0.367067	2.64738	0.00811174	0.0312526
AT1G02810	2.80555	-0.97125	0.37274	2.6057	0.00916865	0.0344773
AT1G68600	575.037	-0.9712	0.145322	6.68307	2.33989e-11	9.15385e-10
AT4G15210	3269.76	-0.97081	0.379883	2.55555	0.010602	0.0387986
AT1G03940	66.57	-0.969832	0.299763	3.23533	0.00121501	0.00652675
AT1G14210	158.944	-0.969399	0.164322	5.89938	3.64874e-09	9.06269e-08
AT5G59720	43.291	-0.969358	0.231462	4.18798	2.81446e-05	0.000259098
AT3G16670	907.89	-0.969197	0.357408	2.71174	0.00669318	0.026674
AT4G13540	33.7226	-0.968824	0.269622	3.59327	0.000326558	0.00214664
AT5G63140	50.0018	-0.968735	0.279662	3.46395	0.000532303	0.00325001
AT1G14430	18.8128	-0.968548	0.364281	2.65879	0.00784218	0.0303714
AT5G04190	215.194	-0.968083	0.24191	4.00182	6.28562e-05	0.000520005
AT1G34315	59.889	-0.968072	0.201699	4.79959	1.5899e-06	2.09781e-05
AT1G52270	35.9326	-0.968068	0.287859	3.363	0.000771014	0.00444853
AT2G15128	20.3553	-0.967551	0.315289	3.06877	0.00214941	0.0104751
AT1G27020	7.16753	-0.965534	0.37289	2.58932	0.00961648	0.035899
AT2G44500	57.277	-0.965442	0.251335	3.84126	0.000122406	0.000923176
AT2G46330	527.611	-0.964603	0.156728	6.15465	7.52434e-10	2.19167e-08
AT3G20395	4.77601	-0.96443	0.369905	2.60724	0.00912762	0.0343617
AT2G25590	327.036	-0.96441	0.15186	6.35065	2.14411e-10	7.00816e-09
AT4G27480	16.2798	-0.963767	0.355645	2.70991	0.00673006	0.0267934
AT1G53790	30.6103	-0.962721	0.291938	3.29769	0.000974844	0.00538809
AT5G24160	569.85	-0.962376	0.217455	4.42564	9.61561e-06	0.000101406
AT1G17200	441.928	-0.962114	0.15937	6.03698	1.57022e-09	4.247e-08
AT1G69370	244.492	-0.961425	0.201369	4.77445	1.80201e-06	2.3247e-05
AT5G61740	32.0088	-0.961336	0.336841	2.85398	0.00431758	0.0186143
AT3G14760	110.539	-0.961255	0.290339	3.31081	0.000930269	0.0051961
AT4G32150	817.804	-0.960751	0.130649	7.35369	1.9281e-13	1.09308e-11
AT1G23000	9.36107	-0.960505	0.366468	2.62098	0.00876782	0.0332125
AT4G20320	19.6834	-0.960361	0.281538	3.41112	0.000646966	0.0038471
AT2G25150	9.01607	-0.959541	0.377353	2.54282	0.010996	0.0398504
AT5G43240	21.5463	-0.959365	0.317333	3.02321	0.00250106	0.0118943
ATMG00110	27.6182	-0.959258	0.290513	3.30195	0.000960154	0.00533038
AT3G11040	64.6793	-0.958299	0.273213	3.50751	0.000452315	0.002827
AT3G62070	78.8876	-0.957501	0.267419	3.58053	0.000342903	0.0022365
AT3G45160	491.971	-0.957118	0.195164	4.90417	9.38254e-07	1.31036e-05
AT1G28260	159.45	-0.957036	0.20202	4.73732	2.16561e-06	2.72487e-05
AT3G19820	2087.8	-0.95625	0.196429	4.86817	1.12634e-06	1.53459e-05
AT5G12420	15.2785	-0.956218	0.35443	2.6979	0.00697775	0.027588
AT5G23270	26.0521	-0.956172	0.299823	3.18912	0.00142707	0.00745247
AT5G66630	37.6128	-0.956056	0.27039	3.53583	0.000406492	0.00259145
AT3G19040	5.58355	-0.956002	0.378531	2.52556	0.0115514	0.0413979
AT1G02800	13.8277	-0.955646	0.330519	2.89135	0.0038359	0.0168859
AT1G49730	396.133	-0.955472	0.186835	5.11398	3.15443e-07	5.04835e-06
AT1G15670	17.4095	-0.955459	0.363799	2.62633	0.00863099	0.0328034
AT1G77380	10.6679	-0.955233	0.362714	2.63357	0.00844925	0.0322618
AT1G29500	128.773	-0.954851	0.252683	3.77884	0.00015756	0.00114901
AT2G25820	11.7373	-0.954627	0.347803	2.74473	0.00605601	0.0245879
AT1G31690	83.8908	-0.954414	0.358032	2.66572	0.00768229	0.0298716
AT4G18550	9.84502	-0.953921	0.351463	2.71414	0.00664477	0.0264959
AT5G07580	330.624	-0.953907	0.133593	7.1404	9.30584e-13	4.70426e-11
AT5G58360	10.1193	-0.9538	0.376246	2.53505	0.0112432	0.0405755
AT3G15510	156.455	-0.95326	0.293393	3.24909	0.00115773	0.00625089
AT3G47010	200.553	-0.95302	0.137337	6.93927	3.94139e-12	1.78153e-10
AT1G13110	1518.49	-0.952234	0.145768	6.53255	6.46592e-11	2.37229e-09
AT1G20515	3.22965	-0.951978	0.376739	2.52689	0.0115078	0.0412927
AT5G54530	75.0011	-0.951208	0.168925	5.63095	1.79215e-08	3.87155e-07
AT4G34760	164.055	-0.948455	0.234728	4.04066	5.33004e-05	0.000450964
AT5G16250	77.2973	-0.948205	0.248381	3.81755	0.000134785	0.00100185
AT3G26320	187.055	-0.948009	0.184391	5.1413	2.72842e-07	4.44454e-06
AT5G06270	117.379	-0.947858	0.236872	4.00156	6.29264e-05	0.000520342
AT4G31060	91.8812	-0.947693	0.205972	4.60107	4.20322e-06	4.92725e-05
AT2G18470	9.66179	-0.946295	0.37523	2.5219	0.0116722	0.0417705
AT4G34400	9.48582	-0.946054	0.370485	2.55355	0.010663	0.0389648
AT5G18080	116.938	-0.946006	0.249669	3.78904	0.000151231	0.00110809
AT3G02110	380.467	-0.94588	0.155136	6.09712	1.07999e-09	3.03137e-08
AT2G22930	9.75551	-0.945692	0.38043	2.48585	0.0129242	0.0452978
AT3G45140	25683.1	-0.945619	0.338976	2.78964	0.00527674	0.0219753
AT1G65490	777.926	-0.945071	0.146273	6.46103	1.03996e-10	3.70708e-09
AT5G05960	502.657	-0.9446	0.236651	3.99154	6.56469e-05	0.000539725
AT1G04050	26.1215	-0.944581	0.32835	2.87675	0.00401798	0.0175298
AT3G06070	283.923	-0.943596	0.283049	3.33368	0.000857037	0.00485187
AT3G17100	630.916	-0.942832	0.151982	6.20356	5.52012e-10	1.65595e-08
AT3G10590	2.82522	-0.941766	0.371255	2.53671	0.0111899	0.040405
AT4G04570	546.29	-0.941313	0.204191	4.60996	4.02744e-06	4.74335e-05
AT3G03850	55.3613	-0.94079	0.288915	3.25629	0.0011288	0.00611605
AT3G47220	4.0969	-0.939426	0.379287	2.47682	0.0132557	0.0461856
AT5G51380	12.2771	-0.93935	0.34833	2.69672	0.00700253	0.0276438
AT5G53550	619.586	-0.937546	0.257027	3.64766	0.000264643	0.00179187
AT5G48310	19.9854	-0.93707	0.324406	2.88858	0.0038699	0.0169983
AT1G09710	144.495	-0.93623	0.154155	6.0733	1.2531e-09	3.45445e-08
AT5G41080	15.9125	-0.936146	0.361494	2.58966	0.00960713	0.0358775
AT2G27080	16.549	-0.935821	0.303583	3.08258	0.00205212	0.010067
AT1G78120	39.3454	-0.935711	0.252701	3.70285	0.000213194	0.00149082
AT3G04290	64.1689	-0.935473	0.344256	2.71738	0.0065802	0.0262854
AT4G24265	7.7477	-0.934696	0.369788	2.52765	0.0114828	0.0412325
AT4G37800	3494.21	-0.934103	0.14133	6.60938	3.85938e-11	1.4559e-09
AT3G18900	5.31411	-0.933629	0.37889	2.46412	0.0137351	0.047542
AT2G43510	61.4915	-0.932937	0.362108	2.57641	0.00998328	0.0369999
AT4G39640	676.775	-0.932896	0.186736	4.9958	5.85933e-07	8.6783e-06
AT5G18340	34.5449	-0.932698	0.246575	3.78262	0.000155187	0.00113287
AT2G26695	312.038	-0.932091	0.202919	4.59342	4.36051e-06	5.08194e-05
AT3G14240	1057.31	-0.931245	0.154548	6.02559	1.68494e-09	4.52072e-08
AT1G68800	3.46637	-0.929995	0.378886	2.45455	0.0141062	0.0485753
ATMG00660	39.0729	-0.929608	0.254786	3.64859	0.000263687	0.00178721
AT3G14220	537.178	-0.928024	0.158422	5.85793	4.68682e-09	1.13736e-07
AT2G42380	263.167	-0.927768	0.259569	3.57426	0.000351214	0.00228295
AT3G47420	997.203	-0.927473	0.146358	6.33703	2.34237e-10	7.54624e-09
AT3G03830	18.08	-0.926872	0.365803	2.5338	0.0112834	0.0406911
AT3G55735	2.10176	-0.92667	0.336153	2.75669	0.005839	0.023808
AT1G14630	39.5674	-0.926349	0.292815	3.1636	0.00155831	0.00802504
AT3G23890	89.3385	-0.925896	0.236124	3.92123	8.80986e-05	0.000696906
AT1G58150	52.7481	-0.925367	0.214442	4.31522	1.59441e-05	0.000158564
AT5G25450	7.38648	-0.925107	0.363835	2.54266	0.0110013	0.039853
AT4G18440	7579.3	-0.924065	0.338529	2.72965	0.00634016	0.0255043
AT2G07662	22.8883	-0.92362	0.312734	2.95338	0.00314318	0.0143822
AT4G19700	126.448	-0.921789	0.186509	4.94233	7.71948e-07	1.10738e-05
AT1G03780	24.8967	-0.920516	0.30879	2.98104	0.0028727	0.0133269
AT5G06800	55.1587	-0.920112	0.205754	4.47191	7.75229e-06	8.41432e-05
AT3G08030	1495.03	-0.919307	0.134857	6.8169	9.30232e-12	3.9138e-10
AT1G03710	8.56133	-0.918694	0.362446	2.5347	0.0112543	0.0406009
AT2G22990	9272.18	-0.917771	0.151329	6.06474	1.32164e-09	3.61363e-08
AT1G61610	46.1061	-0.916903	0.313981	2.92025	0.00349756	0.0156192
AT3G14150	371.5	-0.916012	0.163015	5.61918	1.91871e-08	4.10956e-07
AT4G35640	30.1071	-0.915207	0.31457	2.90939	0.00362138	0.0160755
AT2G01890	282.413	-0.914704	0.294602	3.10488	0.00190358	0.00947493
AT3G28100	197.762	-0.914285	0.136506	6.69778	2.11611e-11	8.34347e-10
AT1G73330	28.3609	-0.91396	0.331732	2.75512	0.00586709	0.0238982
AT5G13840	43.9981	-0.913593	0.241814	3.77808	0.000158043	0.0011517
AT5G01720	338.529	-0.913424	0.163975	5.57053	2.53972e-08	5.29831e-07
AT3G42725	7.78016	-0.913168	0.368357	2.47903	0.0131741	0.0459454
AT1G21100	29.3836	-0.913122	0.339024	2.69339	0.00707297	0.0278766
ATMG01360	29.4422	-0.911856	0.254563	3.58205	0.000340906	0.00222605
AT1G66930	2.54778	-0.910971	0.346905	2.62599	0.0086397	0.0328266
AT3G44320	36.3064	-0.910251	0.3039	2.99523	0.00274234	0.0128199
AT3G02020	3213.99	-0.909921	0.237127	3.83727	0.000124408	0.000935111
AT3G05160	481.97	-0.909686	0.146573	6.20637	5.42214e-10	1.63389e-08
AT2G23320	166.401	-0.909272	0.185933	4.89032	1.00673e-06	1.3905e-05
AT2G16060	14.4565	-0.90845	0.364039	2.49547	0.0125789	0.0443043
AT4G01580	45.0533	-0.908295	0.27318	3.3249	0.000884504	0.00497091
AT3G59310	127.834	-0.908181	0.18488	4.91228	9.00241e-07	1.26697e-05
AT3G05220	990.833	-0.908102	0.142917	6.35404	2.0973e-10	6.88883e-09
AT3G12610	540.359	-0.90793	0.225387	4.02831	5.6179e-05	0.00047253
AT3G54510	32.3141	-0.907805	0.262304	3.46089	0.000538387	0.00328017
AT1G68585	75.9367	-0.906461	0.200043	4.53133	5.8613e-06	6.56563e-05
AT5G66230	25.7318	-0.905882	0.309107	2.93064	0.00338264	0.0152211
AT1G21050	164.711	-0.90537	0.15563	5.81746	5.97468e-09	1.42575e-07
AT2G26870	118.385	-0.904123	0.190354	4.74969	2.03724e-06	2.58768e-05
AT2G36420	61.6016	-0.904109	0.243516	3.71273	0.000205039	0.00144181
AT1G05020	29.7707	-0.903361	0.303132	2.98009	0.00288167	0.0133562
AT4G11211	266.33	-0.902663	0.213732	4.22335	2.40702e-05	0.000226791
AT3G49260	900.395	-0.902561	0.230984	3.90745	9.32735e-05	0.000732071
AT1G28400	690.228	-0.901893	0.17835	5.05687	4.26204e-07	6.57052e-06
AT3G29173	14.2014	-0.90132	0.329301	2.73707	0.00619894	0.0250249
AT3G27580	77.0451	-0.901302	0.178386	5.05254	4.35969e-07	6.68534e-06
AT2G21220	2.53351	-0.90112	0.331865	2.71532	0.00662114	0.0264332
AT1G32170	28.3293	-0.900859	0.280785	3.20835	0.00133497	0.00704671
AT1G10360	1048.66	-0.900268	0.122913	7.32446	2.39868e-13	1.33349e-11
AT1G78110	103.54	-0.900025	0.206086	4.36724	1.25828e-05	0.000128511
AT3G18215	236.529	-0.89959	0.150924	5.96056	2.51378e-09	6.50956e-08
AT4G20820	58.265	-0.899439	0.290778	3.09322	0.00197996	0.00977511
AT4G18260	20.4164	-0.899161	0.35338	2.54446	0.0109448	0.0397198
AT2G41550	11.5493	-0.899024	0.348838	2.5772	0.00996047	0.036929
ATMG01170	29.8388	-0.898818	0.327997	2.74032	0.00613794	0.0248401
AT5G05430	14.972	-0.898395	0.344263	2.60962	0.00906427	0.0341424
AT5G18780	84.5161	-0.898138	0.231396	3.88139	0.000103863	0.000804485
AT3G48590	273.132	-0.897845	0.145505	6.17054	6.80569e-10	2.00269e-08
AT3G18690	18.4523	-0.897449	0.324313	2.76723	0.0056534	0.0231973
AT1G80060	62.5078	-0.896827	0.209628	4.27818	1.88424e-05	0.000183624
AT1G50180	92.4337	-0.896427	0.180657	4.96204	6.97571e-07	1.01499e-05
AT1G02610	46.2666	-0.896309	0.360072	2.48925	0.0128012	0.0449374
AT2G42730	54.1134	-0.89528	0.226236	3.95729	7.58051e-05	0.000611222
AT2G02950	196.464	-0.89452	0.195298	4.58027	4.64374e-06	5.35913e-05
AT1G34210	519.853	-0.894249	0.087384	10.2336	1.40277e-24	5.11857e-22
AT3G06850	262.705	-0.894195	0.180845	4.94454	7.63251e-07	1.09962e-05
AT4G15430	92.6795	-0.89363	0.207857	4.29925	1.71381e-05	0.000168848
AT5G60490	63.8506	-0.893464	0.299811	2.98009	0.0028816	0.0133562
AT3G29680	96.736	-0.892291	0.176764	5.04792	4.46648e-07	6.82694e-06
AT5G25265	797.883	-0.892218	0.169667	5.25863	1.45132e-07	2.53344e-06
AT4G23410	30.498	-0.891972	0.289418	3.08196	0.00205646	0.0100784
AT1G11340	55.887	-0.891885	0.243839	3.65768	0.000254504	0.00173729
AT2G36950	676.947	-0.891361	0.104637	8.51859	1.61505e-17	1.86278e-15
AT5G60142	14.365	-0.891098	0.321455	2.77208	0.00557	0.0229019
AT2G18670	96.0089	-0.889824	0.192167	4.63048	3.64816e-06	4.35378e-05
AT4G12490	9.66208	-0.888634	0.349426	2.54313	0.0109866	0.039837
AT3G25070	384.185	-0.888365	0.15933	5.57561	2.46659e-08	5.16322e-07
AT1G17830	27.3602	-0.888021	0.299292	2.96707	0.00300652	0.0138548
AT4G02482	15.9601	-0.887493	0.344392	2.57698	0.00996665	0.0369451
AT2G30990	278.78	-0.887148	0.159375	5.56643	2.60014e-08	5.4131e-07
AT1G02940	3.57349	-0.886507	0.348266	2.54549	0.0109125	0.0396603
AT5G62230	10.4517	-0.886136	0.357423	2.47923	0.0131665	0.0459454
AT3G22820	18.931	-0.885716	0.286451	3.09203	0.00198792	0.00981198
AT2G07585	10.9843	-0.88528	0.337948	2.61958	0.00880392	0.0333307
AT5G18290	26.4277	-0.885067	0.265847	3.32923	0.000870867	0.00491356
AT4G15620	201.686	-0.884477	0.210901	4.19379	2.74326e-05	0.000253591
AT3G48530	581.865	-0.884042	0.215722	4.09805	4.16644e-05	0.000364182
AT3G60840	52.662	-0.883409	0.264458	3.34045	0.000836416	0.00475525
AT1G12200	164.822	-0.883185	0.162767	5.42609	5.7603e-08	1.10228e-06
AT3G22760	58.7818	-0.881482	0.254798	3.45953	0.000541129	0.00329388
AT1G02640	104.737	-0.881209	0.185891	4.74047	2.13227e-06	2.68713e-05
AT3G05690	81.8094	-0.880678	0.207286	4.24862	2.15089e-05	0.000206537
AT4G29050	77.3469	-0.880619	0.251111	3.50689	0.000453384	0.00283192
AT2G27480	43.8426	-0.880552	0.209096	4.21124	2.53974e-05	0.000237401
AT3G52390	40.5592	-0.880316	0.249926	3.5223	0.000427819	0.00270423
AT5G26000	35198.1	-0.879763	0.186844	4.70855	2.49489e-06	3.08502e-05
AT1G09420	50.5632	-0.879623	0.232947	3.77607	0.000159323	0.00115976
AT1G03090	454.106	-0.879603	0.263799	3.33437	0.000854923	0.00484236
AT3G49320	45.4404	-0.87923	0.309714	2.83884	0.00452775	0.019327
AT5G34940	52.4511	-0.878741	0.23701	3.7076	0.00020923	0.00146819
AT1G22400	56.3433	-0.878593	0.24781	3.54542	0.000391982	0.00250771
AT1G25530	36.67	-0.878587	0.31125	2.82277	0.00476103	0.0201326
AT1G56140	173.934	-0.878182	0.15812	5.55389	2.79373e-08	5.75641e-07
AT5G18640	442.935	-0.878064	0.126649	6.93306	4.11833e-12	1.85316e-10
AT3G63280	27.7657	-0.877191	0.265704	3.30139	0.000962078	0.00533663
AT3G56480	116.165	-0.876875	0.173386	5.05737	4.25072e-07	6.56214e-06
AT2G17036	49.8573	-0.876574	0.235761	3.71807	0.000200753	0.00141863
AT1G02700	14.9749	-0.876027	0.331654	2.64139	0.00825666	0.0316771
AT3G01770	576.471	-0.875813	0.125154	6.99787	2.59885e-12	1.21921e-10
AT3G57330	1054.1	-0.875559	0.158415	5.527	3.25755e-08	6.61698e-07
AT1G78090	84.0336	-0.875132	0.229503	3.81317	0.000137197	0.00101677
AT5G35732	32.5292	-0.874987	0.239331	3.65597	0.000256214	0.00174461
AT5G48800	66.8632	-0.874534	0.199647	4.38041	1.18458e-05	0.000121852
AT1G65620	15.5686	-0.874015	0.339265	2.5762	0.00998919	0.0370092
AT1G05620	124.38	-0.873892	0.158345	5.5189	3.41122e-08	6.89811e-07
AT1G56145	82.3941	-0.87377	0.179782	4.86015	1.17297e-06	1.59271e-05
AT1G45130	310.28	-0.872538	0.164961	5.28937	1.22737e-07	2.1837e-06
AT1G68872	25.0276	-0.871641	0.284403	3.06481	0.00217809	0.0105789
AT4G34250	116.601	-0.870248	0.25597	3.3998	0.000674341	0.00397806
AT1G74940	344.19	-0.869644	0.170154	5.11092	3.20592e-07	5.11851e-06
AT4G20140	117.484	-0.868463	0.155334	5.59096	2.25824e-08	4.77059e-07
AT5G13710	746.732	-0.86791	0.134781	6.43942	1.19928e-10	4.20039e-09
AT4G00940	34.179	-0.867891	0.271329	3.19867	0.00138063	0.00724769
AT5G19740	190.72	-0.867541	0.171829	5.04886	4.44463e-07	6.79872e-06
AT2G07629	18.2536	-0.867508	0.32122	2.70067	0.00692006	0.0274247
AT1G14120	7.49511	-0.866796	0.328298	2.64027	0.00828394	0.0317514
AT1G31770	114.143	-0.866746	0.191946	4.51558	6.31449e-06	7.01303e-05
AT2G14095	9.28924	-0.866265	0.351659	2.46337	0.0137638	0.0476213
AT2G24100	124.575	-0.866078	0.151328	5.72316	1.04558e-08	2.39021e-07
AT1G26960	46.5344	-0.865944	0.216167	4.00591	6.17801e-05	0.000513189
AT1G55850	440.579	-0.865384	0.217448	3.97972	6.89955e-05	0.00056425
AT2G24645	112.108	-0.86458	0.201666	4.2872	1.80942e-05	0.000177138
AT4G27900	127.035	-0.864305	0.21148	4.08693	4.37113e-05	0.000379759
AT1G28710	112.101	-0.864024	0.174047	4.96431	6.89468e-07	1.00413e-05
AT3G46900	143.71	-0.863078	0.276689	3.11931	0.00181277	0.00910648
AT1G53710	179.341	-0.861958	0.124161	6.94228	3.85831e-12	1.74791e-10
AT1G63240	326.655	-0.861224	0.135142	6.37275	1.85663e-10	6.21013e-09
AT2G32990	441.106	-0.86091	0.146002	5.89657	3.71146e-09	9.20708e-08
AT2G39420	307.384	-0.860406	0.207565	4.14524	3.39452e-05	0.000303721
AT4G25620	182.104	-0.860207	0.179974	4.77961	1.75634e-06	2.27517e-05
AT3G04000	34.6154	-0.859935	0.313851	2.73995	0.00614494	0.0248549
AT2G47440	463.624	-0.859897	0.134794	6.37933	1.77862e-10	5.99108e-09
AT1G09155	2.10608	-0.858253	0.345037	2.48742	0.0128674	0.0451302
AT1G32920	69.6471	-0.857956	0.261279	3.28367	0.00102463	0.00562148
AT5G56530	145.156	-0.857828	0.247175	3.47053	0.000519425	0.00317815
AT2G02820	107.362	-0.855212	0.18138	4.71502	2.41686e-06	3.00148e-05
AT3G10870	69.1567	-0.853645	0.318062	2.68389	0.00727703	0.0285519
AT1G17560	40.8059	-0.852983	0.271509	3.14164	0.00168006	0.00855328
AT5G16720	136.598	-0.852891	0.167722	5.08516	3.67323e-07	5.75922e-06
AT2G03505	66.1621	-0.852319	0.196949	4.32761	1.50738e-05	0.000151258
AT1G05950	30.2562	-0.852283	0.298202	2.85808	0.00426218	0.018415
AT3G28860	1565.32	-0.851997	0.150597	5.65745	1.53639e-08	3.37527e-07
AT1G06980	73.4454	-0.851787	0.192639	4.42167	9.79413e-06	0.000103126
AT3G08660	109.069	-0.851139	0.201984	4.2139	2.50996e-05	0.000234946
AT5G26220	48.7002	-0.851127	0.305156	2.78916	0.00528458	0.0220034
AT5G28262	34.6347	-0.851066	0.239919	3.54731	0.000389192	0.00249383
AT3G01690	1955.99	-0.850654	0.100453	8.46819	2.49231e-17	2.76343e-15
AT4G37520	163.274	-0.849692	0.268682	3.16244	0.00156453	0.0080509
AT3G59890	83.8483	-0.84792	0.232213	3.65147	0.000260745	0.00176966
AT5G67270	27.4154	-0.847532	0.296064	2.86266	0.00420095	0.0181739
AT2G34510	567.248	-0.847015	0.124267	6.81611	9.35381e-12	3.91903e-10
AT4G15800	234.838	-0.84682	0.114988	7.36444	1.77886e-13	1.0142e-11
AT2G46490	281.212	-0.846456	0.119943	7.05717	1.69933e-12	8.27764e-11
AT1G65985	49.891	-0.846024	0.215281	3.92986	8.49966e-05	0.000674495
AT1G48200	38.3096	-0.844023	0.261254	3.23066	0.00123507	0.00661681
AT3G47570	148.23	-0.843811	0.165684	5.09289	3.52644e-07	5.56384e-06
AT3G24100	853.086	-0.842725	0.104598	8.05682	7.83046e-16	6.77368e-14
AT4G15233	79.2091	-0.842618	0.309358	2.72376	0.00645427	0.0258596
AT2G33560	14.9954	-0.841065	0.338795	2.48252	0.0130457	0.0456203
AT1G71970	343.695	-0.839639	0.176763	4.75009	2.03322e-06	2.58421e-05
AT5G12200	512.441	-0.839313	0.123414	6.80081	1.04035e-11	4.3049e-10
AT1G62660	771.46	-0.83917	0.193282	4.3417	1.41385e-05	0.000143162
AT4G39480	2.36336	-0.838797	0.34304	2.44519	0.0144776	0.0495991
AT3G52910	78.9519	-0.838795	0.211015	3.97504	7.03668e-05	0.000573828
AT1G75220	959.312	-0.838379	0.125569	6.67665	2.4446e-11	9.52635e-10
AT1G29330	59.6462	-0.838327	0.221139	3.79095	0.000150072	0.0011004
AT1G78830	1088.86	-0.837667	0.188221	4.45043	8.5697e-06	9.12389e-05
AT5G19110	4.05427	-0.837538	0.322195	2.59947	0.00933676	0.0349905
AT4G40060	1046.46	-0.836909	0.0904282	9.25495	2.14322e-20	3.9102e-18
AT3G52500	1047.68	-0.83658	0.154125	5.42792	5.70149e-08	1.09391e-06
AT2G43690	29.8865	-0.83652	0.280098	2.98653	0.00282163	0.0131325
AT2G22420	47.3594	-0.833672	0.211759	3.93689	8.25451e-05	0.000658949
AT4G24350	983.245	-0.833127	0.205629	4.05161	5.08655e-05	0.000433423
AT2G26020	101.949	-0.832984	0.318692	2.61376	0.00895516	0.0338076
AT1G33265	83.4409	-0.832934	0.205535	4.05252	5.0668e-05	0.000432337
AT4G29080	212.22	-0.831389	0.197005	4.22013	2.44157e-05	0.000229938
AT5G53880	287.39	-0.830976	0.174792	4.7541	1.99333e-06	2.53995e-05
AT4G29360	113.133	-0.83097	0.215689	3.85262	0.000116859	0.00088835
AT4G28070	61.7338	-0.829352	0.24596	3.37189	0.000746537	0.00432263
AT3G10010	179.454	-0.828951	0.181944	4.55609	5.21155e-06	5.92352e-05
AT2G40435	136.089	-0.828924	0.198283	4.18052	2.90849e-05	0.00026641
AT1G26580	1347.3	-0.828827	0.176077	4.7072	2.51145e-06	3.10169e-05
AT2G21080	115.165	-0.828125	0.197164	4.20018	2.66705e-05	0.000247343
AT1G09410	12.777	-0.828038	0.328747	2.51877	0.0117766	0.0420765
AT3G53760	57.8629	-0.827452	0.250207	3.30706	0.000942797	0.00525437
AT3G63510	291.645	-0.827101	0.165308	5.00341	5.6326e-07	8.37338e-06
AT2G39300	19.0298	-0.826363	0.286385	2.8855	0.0039079	0.0171314
AT1G61667	24.8523	-0.825905	0.320103	2.58012	0.00987646	0.0366727
AT5G64870	15.6534	-0.825499	0.314903	2.62144	0.00875585	0.03318
AT1G69080	32.6125	-0.825467	0.308884	2.67241	0.00753075	0.0293996
AT3G30775	287.478	-0.823654	0.271138	3.03777	0.00238339	0.0114158
AT5G05690	2379.56	-0.823454	0.134181	6.1369	8.41477e-10	2.41943e-08
ATMG00090	25.5915	-0.823255	0.29221	2.81734	0.0048423	0.0204246
AT5G46240	727.082	-0.823211	0.195236	4.2165	2.48121e-05	0.000233016
AT3G13062	923.196	-0.822629	0.204452	4.02357	5.73216e-05	0.000479928
AT4G36850	519.824	-0.822565	0.241103	3.41168	0.000645641	0.00384036
AT1G80420	287.017	-0.821501	0.162532	5.05441	4.31726e-07	6.63932e-06
AT5G48960	530.626	-0.820868	0.159289	5.15332	2.55913e-07	4.19601e-06
AT1G18180	28.7488	-0.820247	0.29757	2.75649	0.00584261	0.023813
AT4G39550	34.0379	-0.820216	0.248374	3.30234	0.000958816	0.00532493
AT1G77270	53.9143	-0.819617	0.280152	2.92562	0.00343773	0.0154172
AT2G42760	204.506	-0.818369	0.164102	4.98696	6.13353e-07	9.04105e-06
AT1G77420	224.249	-0.818366	0.194135	4.21546	2.4927e-05	0.000233658
AT3G04350	242.966	-0.817821	0.124835	6.55122	5.70682e-11	2.10921e-09
AT5G20150	299.1	-0.81742	0.205119	3.9851	6.74513e-05	0.0005532
AT5G65207	69.5437	-0.816109	0.312513	2.61144	0.00901617	0.0339995
AT5G25475	32.8002	-0.816062	0.266234	3.0652	0.00217523	0.0105702
AT5G63470	229.998	-0.814787	0.196454	4.14747	3.36176e-05	0.000301058
AT5G65750	490.972	-0.814759	0.111086	7.33449	2.22573e-13	1.25006e-11
AT2G39570	1293.91	-0.81369	0.309583	2.62835	0.00858014	0.0326684
AT5G59660	41.645	-0.812867	0.293396	2.77054	0.00559632	0.0229913
AT3G29670	231.008	-0.812823	0.221999	3.66139	0.000250852	0.00171469
AT3G06300	190.083	-0.812738	0.148014	5.49095	3.99776e-08	7.95153e-07
AT5G37000	31.3854	-0.812428	0.274406	2.96067	0.00306966	0.0141005
AT1G26945	295.54	-0.811746	0.187253	4.33503	1.45742e-05	0.000147128
AT5G20670	48.5875	-0.811505	0.238206	3.40673	0.000657457	0.00389794
AT5G66920	113.329	-0.811043	0.265218	3.05803	0.00222799	0.0107744
AT4G16745	74.3635	-0.810167	0.261398	3.09936	0.00193941	0.00959773
AT2G22800	101.932	-0.809967	0.213368	3.7961	0.000146991	0.00108137
AT4G19420	376.055	-0.808694	0.190858	4.23715	2.26371e-05	0.000215514
AT1G52700	29.7289	-0.808485	0.283214	2.85468	0.00430804	0.0185851
AT3G55420	141.885	-0.807877	0.180254	4.48189	7.39851e-06	8.0696e-05
AT3G59710	139.58	-0.807454	0.183765	4.39394	1.11315e-05	0.000115213
AT5G53360	26.1962	-0.807195	0.271195	2.97644	0.00291618	0.0134974
AT1G52565	28.7831	-0.806927	0.320092	2.52093	0.0117046	0.0418642
AT1G44350	214.481	-0.806852	0.312332	2.58332	0.00978559	0.0364084
AT2G04690	722.415	-0.806524	0.179717	4.48774	7.19834e-06	7.88126e-05
AT1G68400	129.161	-0.806489	0.218853	3.68507	0.00022864	0.00158227
AT1G08230	249.18	-0.805054	0.162246	4.96194	6.97938e-07	1.01499e-05
AT2G30420	57.7409	-0.804906	0.259544	3.10123	0.00192718	0.00955447
AT2G27400	77.6422	-0.804724	0.204771	3.92988	8.49877e-05	0.000674495
AT4G37750	95.2216	-0.80345	0.223512	3.59467	0.000324807	0.00213723
AT1G17380	50.8241	-0.80341	0.301771	2.66232	0.00776046	0.0301305
AT5G38895	75.8263	-0.803234	0.199457	4.02709	5.64704e-05	0.000474384
AT1G10200	704.799	-0.803002	0.11846	6.77869	1.2127e-11	4.97704e-10
AT1G13950	134.98	-0.801018	0.158981	5.03846	4.69283e-07	7.12948e-06
AT5G66880	271.445	-0.800204	0.133965	5.97325	2.32575e-09	6.07754e-08
AT3G16620	32.2096	-0.800127	0.291755	2.74247	0.00609799	0.0247184
AT5G13990	1.62175	-0.798808	0.323242	2.47124	0.0134646	0.0467755
AT1G07170	115.292	-0.798778	0.15175	5.26378	1.41121e-07	2.4735e-06
AT1G63530	30.6634	-0.797648	0.317689	2.51079	0.0120463	0.0428268
AT5G65210	222.118	-0.796564	0.182469	4.36548	1.26842e-05	0.000129347
AT1G17600	59.1106	-0.796528	0.191517	4.15904	3.19591e-05	0.000288523
AT2G22330	1474.32	-0.796332	0.205017	3.88422	0.000102658	0.000795765
AT3G23010	100.941	-0.795519	0.256842	3.09731	0.00195285	0.0096555
AT5G03285	93.6452	-0.795	0.17995	4.4179	9.96622e-06	0.000104664
AT2G19310	831.801	-0.794623	0.156246	5.08572	3.66232e-07	5.74752e-06
AT5G52780	1008.45	-0.793856	0.0790367	10.0441	9.74905e-24	3.1557e-21
AT3G63450	77.1618	-0.793798	0.297547	2.6678	0.00763492	0.0297121
AT3G59680	39.1593	-0.79332	0.324751	2.44286	0.0145716	0.0498443
AT5G18670	411.204	-0.793013	0.181619	4.36635	1.2634e-05	0.000128903
AT1G54450	45.3238	-0.792961	0.259619	3.05432	0.00225572	0.0108848
AT1G35430	68.4373	-0.792922	0.188514	4.20617	2.59736e-05	0.00024211
AT3G51840	1880.91	-0.792246	0.181554	4.36371	1.27877e-05	0.000130262
AT1G11420	19.0723	-0.791998	0.31061	2.54982	0.010778	0.0392779
AT2G42610	219.868	-0.790615	0.248273	3.18446	0.00145023	0.00755967
AT5G04330	19.7698	-0.78959	0.309124	2.55428	0.0106407	0.0389047
AT5G14120	1122.5	-0.78907	0.158481	4.97894	6.39331e-07	9.38606e-06
AT5G35670	52.6836	-0.788336	0.256123	3.07796	0.00208421	0.010197
AT5G06150	29.8064	-0.788335	0.266349	2.95978	0.00307855	0.0141159
AT5G13240	586.221	-0.78809	0.0970095	8.12385	4.51636e-16	4.08283e-14
AT1G71990	93.7346	-0.787608	0.16878	4.66648	3.06401e-06	3.7155e-05
AT4G38660	188.457	-0.787486	0.212745	3.70156	0.000214282	0.00149736
AT2G15080	865.171	-0.785203	0.247014	3.17878	0.00147896	0.00767951
AT2G29400	737.596	-0.785037	0.149007	5.26845	1.37579e-07	2.41987e-06
AT1G75450	53.3238	-0.784782	0.248513	3.15791	0.00158902	0.00815393
AT4G38480	33.0458	-0.784767	0.23572	3.32923	0.000870871	0.00491356
AT5G49450	105.256	-0.783694	0.28728	2.72798	0.00637229	0.025595
AT2G29890	135.704	-0.783467	0.15074	5.19746	2.02029e-07	3.39859e-06
AT4G29170	25.6284	-0.782126	0.288675	2.70937	0.00674113	0.0268215
AT4G38020	291.938	-0.781995	0.143222	5.46002	4.7609e-08	9.2944e-07
AT5G51100	205.036	-0.781695	0.170576	4.58268	4.59044e-06	5.31595e-05
AT1G18370	28.0766	-0.780735	0.274537	2.84383	0.00445752	0.0191027
AT2G04860	35.522	-0.780512	0.270191	2.88874	0.00386791	0.016997
AT2G22610	37.9259	-0.779851	0.262872	2.96666	0.00301052	0.0138669
AT5G64950	21.9109	-0.779391	0.293835	2.65248	0.00799029	0.030832
AT5G61190	189.304	-0.779122	0.133284	5.84559	5.04789e-09	1.21909e-07
AT5G61070	21.632	-0.778545	0.298712	2.60634	0.0091515	0.0344258
AT1G59540	21.5458	-0.778308	0.312881	2.48756	0.0128624	0.0451206
AT1G70430	46.0907	-0.77808	0.213405	3.64602	0.000266334	0.0018009
AT3G48330	255.608	-0.777979	0.127014	6.12516	9.059e-10	2.58246e-08
AT4G15140	33.3462	-0.777842	0.311744	2.49513	0.0125911	0.0443316
AT1G32540	771.414	-0.777509	0.167058	4.65412	3.25368e-06	3.93125e-05
AT2G43550	956.157	-0.776942	0.219109	3.54592	0.000391246	0.00250446
AT5G10250	177.572	-0.776454	0.249814	3.10813	0.00188275	0.00939457
AT2G42330	220.27	-0.77632	0.135931	5.71112	1.12238e-08	2.55967e-07
AT3G44960	20.1144	-0.775691	0.306337	2.53215	0.0113366	0.0408097
AT3G10740	1383.16	-0.775556	0.164398	4.71754	2.38713e-06	2.97007e-05
AT3G10310	39.6417	-0.774056	0.220856	3.5048	0.000456949	0.00284976
AT5G28020	1505.4	-0.773465	0.129412	5.97675	2.27635e-09	5.97179e-08
AT5G37740	61.8476	-0.772995	0.194626	3.97169	7.1364e-05	0.000580675
AT4G35060	48.1733	-0.772916	0.259656	2.9767	0.00291374	0.0134923
AT3G22880	32.0647	-0.772777	0.283133	2.72938	0.00634531	0.0255147
AT3G02700	142.074	-0.77141	0.149901	5.14612	2.65929e-07	4.34957e-06
AT1G14920	580.121	-0.770566	0.178754	4.31075	1.627e-05	0.000161325
AT4G33270	45.3278	-0.770244	0.25714	2.99543	0.00274059	0.0128191
AT1G63180	38.0698	-0.768499	0.295574	2.60002	0.00932186	0.0349487
AT5G57790	57.8056	-0.768064	0.196478	3.90915	9.26213e-05	0.000727806
AT5G05550	104.246	-0.767871	0.156838	4.89595	9.78298e-07	1.35778e-05
AT2G22890	24.0547	-0.76736	0.281394	2.72699	0.00639147	0.0256438
AT1G50460	440.899	-0.767349	0.221994	3.45663	0.00054698	0.00332345
AT4G27740	268.56	-0.767141	0.171586	4.47087	7.79003e-06	8.44158e-05
AT1G61795	138.804	-0.766181	0.144819	5.29061	1.21907e-07	2.17434e-06
AT2G23790	308.915	-0.766097	0.188954	4.0544	5.02636e-05	0.000429068
AT3G50750	547.493	-0.765226	0.125786	6.08354	1.17559e-09	3.26319e-08
AT4G30850	26.1372	-0.764935	0.270517	2.82767	0.00468874	0.0198897
AT1G80180	1154.44	-0.764542	0.198005	3.86123	0.000112819	0.000861552
AT1G30530	1016.64	-0.764272	0.154741	4.93903	7.85117e-07	1.12386e-05
AT1G02730	114.219	-0.764139	0.171475	4.45626	8.34028e-06	8.93175e-05
AT2G35700	41.2795	-0.763936	0.241648	3.16137	0.00157031	0.00807239
AT4G12080	21.3661	-0.763827	0.304913	2.50506	0.0122429	0.0433424
AT2G03530	519.459	-0.763572	0.193253	3.95116	7.77742e-05	0.00062509
AT5G57700	254.758	-0.762577	0.143989	5.29608	1.18314e-07	2.12194e-06
AT1G34380	85.6855	-0.762453	0.208073	3.66436	0.000247963	0.00169784
AT1G65040	526.74	-0.762312	0.0932835	8.17199	3.03356e-16	2.79268e-14
AT1G78460	791.598	-0.762306	0.187476	4.06615	4.77963e-05	0.000411331
AT5G17160	39.4578	-0.761931	0.276071	2.75991	0.00578172	0.0236272
AT5G56610	36.6934	-0.76149	0.244051	3.12021	0.00180719	0.00908303
AT3G05190	36.161	-0.761103	0.236475	3.21853	0.00128849	0.0068482
AT5G57850	647.148	-0.760257	0.0882454	8.61527	6.97797e-18	8.69819e-16
AT5G51310	27.8864	-0.760099	0.271466	2.79998	0.00511056	0.021421
AT5G10860	1050.97	-0.759941	0.203906	3.72693	0.00019383	0.00137601
AT1G61170	76.7913	-0.758802	0.194662	3.89806	9.69672e-05	0.000756623
AT5G64370	462.029	-0.758766	0.114074	6.65155	2.9002e-11	1.11289e-09
AT1G31550	310.409	-0.758503	0.195149	3.88678	0.000101582	0.000788033
AT4G14750	62.6756	-0.758295	0.19249	3.93941	8.16825e-05	0.000653362
AT4G15780	523.276	-0.757635	0.110588	6.85095	7.33635e-12	3.11935e-10
AT4G23493	15.5758	-0.757479	0.306076	2.4748	0.0133309	0.0463912
AT5G49100	456.575	-0.757257	0.163406	4.6342	3.58326e-06	4.28816e-05
AT4G01410	114.216	-0.7562	0.189064	3.99971	6.34193e-05	0.00052377
AT1G29980	105.957	-0.755952	0.20754	3.64245	0.000270059	0.00182321
AT3G07340	125.95	-0.755746	0.180689	4.18258	2.88221e-05	0.000264486
AT1G27420	51.6314	-0.754839	0.219361	3.44109	0.000579379	0.00349596
AT3G15140	53.494	-0.754647	0.226306	3.33463	0.000854127	0.00483949
AT3G05320	67.2649	-0.754536	0.202489	3.72631	0.000194306	0.00137791
AT1G06283	58.9624	-0.754404	0.2944	2.56251	0.0103918	0.0381862
AT3G28770	79.6757	-0.75391	0.294487	2.56008	0.0104648	0.0383947
AT2G01940	63.5143	-0.75342	0.198167	3.80195	0.000143561	0.00105885
AT3G22790	163.458	-0.75265	0.250518	3.00437	0.00266127	0.0125227
AT3G63480	33.8437	-0.7525	0.246294	3.05529	0.00224844	0.0108549
AT3G10960	66.0689	-0.751835	0.197609	3.80465	0.000142003	0.00104853
AT5G07030	353.825	-0.751632	0.275533	2.72792	0.00637352	0.025595
AT4G02100	80.6289	-0.751542	0.190158	3.95219	7.74384e-05	0.000622641
AT5G05790	80.0319	-0.751444	0.18085	4.15506	3.25205e-05	0.000292801
AT1G28670	507.401	-0.75122	0.124304	6.04343	1.50873e-09	4.09171e-08
AT3G54000	32.1011	-0.749321	0.246319	3.04207	0.00234956	0.0112867
AT4G33260	24.087	-0.74836	0.274964	2.72167	0.00649529	0.025998
AT2G17480	210.445	-0.748063	0.143047	5.22947	1.69993e-07	2.92589e-06
AT5G03830	216.344	-0.747893	0.129938	5.75577	8.62466e-09	1.9964e-07
AT5G07770	269.553	-0.747632	0.197408	3.78723	0.000152334	0.00111495
AT2G34190	23.8458	-0.746413	0.276306	2.7014	0.00690486	0.0273861
AT2G36570	219.233	-0.746242	0.256267	2.91198	0.00359151	0.0159677
AT2G32120	94.4961	-0.744878	0.211333	3.52466	0.000424027	0.00268679
AT2G01150	39.8803	-0.744678	0.271976	2.73803	0.0061808	0.0249689
AT4G18960	64.2754	-0.744037	0.272692	2.72849	0.0063625	0.0255663
AT1G54680	48.8696	-0.74396	0.199718	3.72506	0.000195269	0.00138377
AT1G65860	785.731	-0.743564	0.181395	4.09915	4.14668e-05	0.000362772
AT1G63460	140.454	-0.743483	0.189901	3.91512	9.03598e-05	0.000713387
AT4G24230	250.901	-0.743336	0.231983	3.20427	0.00135405	0.00712493
AT3G17130	92.2986	-0.743313	0.196727	3.77839	0.000157846	0.00115067
AT3G10450	117.268	-0.743309	0.2449	3.03516	0.00240412	0.0114959
AT1G63260	110.712	-0.743108	0.23194	3.20388	0.00135587	0.00713077
AT2G46600	779.936	-0.743105	0.203716	3.64775	0.000264543	0.0017918
AT1G76540	52.0479	-0.742917	0.272219	2.72911	0.00635056	0.0255307
AT5G13690	493.835	-0.7429	0.107279	6.9249	4.36278e-12	1.94139e-10
AT4G12010	162.288	-0.742084	0.216395	3.4293	0.00060514	0.00363283
AT1G76560	52.6825	-0.740663	0.211019	3.50994	0.000448209	0.00280859
AT3G07350	284.964	-0.740305	0.247758	2.98801	0.00280797	0.0130746
AT3G52530	27.1418	-0.740158	0.271376	2.72742	0.00638311	0.0256205
AT1G05710	24.2721	-0.739737	0.295456	2.50371	0.0122897	0.0434689
AT5G36700	31.762	-0.739684	0.302275	2.44706	0.0144027	0.0493931
AT3G03450	142.223	-0.739609	0.252172	2.93295	0.00335755	0.0151354
AT4G27260	60.9443	-0.739568	0.28899	2.55915	0.0104929	0.0384836
AT2G22790	27.3401	-0.738807	0.29067	2.54173	0.0110304	0.0399512
AT5G64920	328.606	-0.738773	0.107281	6.88634	5.72463e-12	2.49755e-10
AT1G48210	44.7778	-0.738542	0.237964	3.10359	0.0019119	0.00949291
AT3G09455	61.7744	-0.738114	0.233003	3.16783	0.00153581	0.00793892
AT5G16200	40.0551	-0.738039	0.259076	2.84873	0.00438941	0.0188753
AT1G52245	25.6262	-0.73798	0.298328	2.47372	0.0133715	0.0465004
AT3G47800	239.443	-0.737873	0.199601	3.69674	0.000218387	0.00152181
AT5G58710	632.336	-0.73753	0.107341	6.87088	6.38077e-12	2.77152e-10
AT2G40820	70.4702	-0.737481	0.266603	2.76621	0.00567117	0.023252
AT3G54366	360.168	-0.737392	0.15451	4.77246	1.81991e-06	2.34577e-05
AT1G61400	35.7871	-0.737358	0.298641	2.46904	0.0135475	0.0469737
AT2G01390	28.5141	-0.737337	0.2564	2.87573	0.00403088	0.0175746
AT5G23010	6431.24	-0.736971	0.208548	3.53381	0.000409613	0.00260886
AT4G36270	76.2116	-0.736451	0.205508	3.58357	0.000338925	0.00221715
AT1G04770	236.001	-0.736311	0.178895	4.11589	3.85689e-05	0.000340986
AT3G10985	795.421	-0.735255	0.176318	4.17005	3.04531e-05	0.000277046
AT5G05730	562.254	-0.73514	0.141502	5.19525	2.04442e-07	3.43631e-06
AT2G39400	206.333	-0.734965	0.263329	2.79105	0.0052538	0.0218934
AT5G51970	2748.55	-0.734948	0.122862	5.98187	2.20589e-09	5.80209e-08
AT1G51760	405.695	-0.734673	0.185828	3.95351	7.70115e-05	0.000619457
AT1G28390	20.8629	-0.733889	0.298022	2.46254	0.0137958	0.0476723
AT5G61250	61.7236	-0.733861	0.234923	3.12383	0.00178513	0.00899244
AT4G36970	125.469	-0.732816	0.173401	4.22614	2.37731e-05	0.000224307
AT1G50590	27.189	-0.73256	0.276722	2.64727	0.00811439	0.0312568
AT2G18440	2246.1	-0.732424	0.0829497	8.82974	1.04922e-18	1.49339e-16
AT3G59330	104.738	-0.732343	0.176207	4.15616	3.23645e-05	0.000291528
AT1G14790	348.026	-0.731975	0.150901	4.85071	1.2302e-06	1.66256e-05
AT5G65740	176.545	-0.73056	0.120212	6.07727	1.22242e-09	3.38384e-08
AT1G78660	524.419	-0.729973	0.110609	6.59961	4.12233e-11	1.55218e-09
AT4G22560	55.1289	-0.729796	0.266097	2.7426	0.00609555	0.0247134
AT3G27940	34.5502	-0.729519	0.269096	2.711	0.00670812	0.026722
AT3G29810	62.7792	-0.72912	0.260788	2.79583	0.00517665	0.0216393
AT2G18570	174.965	-0.729007	0.139511	5.22545	1.73736e-07	2.98519e-06
AT5G51550	474.947	-0.728652	0.134416	5.42085	5.93157e-08	1.13049e-06
AT3G51960	100.677	-0.728002	0.180622	4.03052	5.56541e-05	0.000468507
AT2G31810	806.871	-0.727871	0.179659	4.0514	5.09123e-05	0.0004335
AT5G03460	291.227	-0.727852	0.111446	6.531	6.53324e-11	2.39262e-09
AT3G15990	81.4476	-0.727744	0.178465	4.07778	4.54669e-05	0.000393308
AT1G18880	105.623	-0.727407	0.158084	4.60138	4.19704e-06	4.92287e-05
AT2G30070	284.2	-0.726311	0.117444	6.18434	6.23644e-10	1.846e-08
AT5G52540	633.914	-0.726062	0.118014	6.15231	7.63609e-10	2.21458e-08
AT2G29660	69.9033	-0.725881	0.198206	3.66226	0.000249999	0.00171003
AT4G19160	1114.76	-0.724668	0.200482	3.61462	0.000300787	0.00199686
AT4G25420	46.8089	-0.724292	0.265426	2.7288	0.00635661	0.0255499
AT5G40020	56.291	-0.724149	0.198798	3.64264	0.000269851	0.00182321
AT1G16110	153.68	-0.72367	0.248216	2.91548	0.00355138	0.0158313
AT1G63690	1394.81	-0.723433	0.123851	5.84118	5.18335e-09	1.24879e-07
AT5G19600	279.647	-0.722729	0.28215	2.56151	0.010422	0.0382584
AT2G35075	59.0971	-0.720483	0.272988	2.63924	0.0083091	0.0318342
AT3G21560	135.444	-0.720265	0.222748	3.23355	0.00122264	0.00656131
AT1G70710	97.1042	-0.719805	0.286863	2.50923	0.0120994	0.04297
AT4G34900	303.933	-0.719413	0.245101	2.93517	0.00333369	0.0150568
AT5G02150	108.213	-0.719224	0.168459	4.26943	1.95974e-05	0.000190368
AT3G07215	110.892	-0.719037	0.166968	4.30643	1.65909e-05	0.000164264
AT3G15390	137.706	-0.718639	0.13358	5.37985	7.45472e-08	1.38784e-06
AT1G32190	31.2319	-0.718591	0.279298	2.57285	0.0100865	0.0372791
AT4G03940	41.1284	-0.718081	0.224968	3.19193	0.00141325	0.00738415
AT1G12240	2824.57	-0.717961	0.117953	6.08682	1.15175e-09	3.21035e-08
AT4G02540	280.629	-0.717905	0.195213	3.67754	0.000235491	0.00161963
AT1G09440	191.922	-0.717486	0.119046	6.02694	1.6709e-09	4.49509e-08
AT5G46250	1527.36	-0.717076	0.12848	5.58123	2.38825e-08	5.01883e-07
AT5G18245	41.9529	-0.716977	0.240303	2.98364	0.00284841	0.0132356
AT5G57130	133.427	-0.716948	0.192063	3.73288	0.000189302	0.00134815
AT5G58375	199.307	-0.716825	0.131044	5.47011	4.49768e-08	8.83209e-07
AT1G09570	1039.87	-0.716154	0.196211	3.64991	0.000262333	0.00177864
AT5G63530	967.037	-0.713672	0.10333	6.90671	4.96027e-12	2.19752e-10
AT5G40700	24.1281	-0.713481	0.282962	2.52147	0.0116865	0.0418144
AT3G45420	65.9008	-0.713086	0.208387	3.42194	0.000621768	0.00371266
AT1G26665	49.3782	-0.712704	0.256108	2.78282	0.00538881	0.0223316
AT2G22660	658.941	-0.712474	0.154981	4.59716	4.28289e-06	5.00601e-05
AT3G28850	43.1623	-0.712349	0.238077	2.99209	0.00277073	0.0129316
AT3G22970	1533.84	-0.712324	0.128032	5.56363	2.64225e-08	5.48369e-07
AT5G65020	474.797	-0.71213	0.184857	3.85232	0.000117003	0.000889105
AT1G56010	77.9414	-0.712018	0.286935	2.48146	0.0130846	0.0457242
AT2G04530	355.824	-0.711755	0.172149	4.13452	3.55696e-05	0.000317124
AT4G19860	1100.6	-0.71128	0.170701	4.16681	3.08889e-05	0.000280502
AT4G22160	116.385	-0.711052	0.197373	3.60258	0.000315076	0.00208482
AT4G33160	36.6155	-0.71073	0.247721	2.86908	0.00411666	0.0178593
AT1G07380	129.31	-0.710605	0.153639	4.62515	3.74329e-06	4.44636e-05
AT5G02160	5221.74	-0.709225	0.210894	3.36294	0.000771161	0.00444853
AT3G17950	94.9959	-0.708202	0.175532	4.03461	5.46934e-05	0.000461776
AT5G60300	207.151	-0.708007	0.14612	4.84538	1.26372e-06	1.70441e-05
AT2G22620	22.9206	-0.707864	0.274906	2.57493	0.0100261	0.0371038
AT3G19400	284.571	-0.706689	0.124732	5.66567	1.46449e-08	3.23605e-07
AT5G23800	51.3507	-0.706541	0.209188	3.37753	0.00073139	0.00424595
AT2G06050	838.806	-0.706194	0.201593	3.50307	0.000459925	0.00286653
AT1G72430	833.549	-0.704893	0.112361	6.27349	3.53041e-10	1.09678e-08
AT5G11070	191.667	-0.704865	0.184207	3.82649	0.000129984	0.000971198
AT1G28580	336.139	-0.704787	0.140011	5.03378	4.80892e-07	7.28468e-06
AT1G08900	518.99	-0.70424	0.141128	4.99009	6.0351e-07	8.91888e-06
AT1G35516	580.123	-0.704134	0.106163	6.63258	3.29866e-11	1.25857e-09
AT2G20180	402.541	-0.702908	0.118276	5.94293	2.79978e-09	7.13963e-08
AT1G48430	563.501	-0.702012	0.107112	6.55397	5.60258e-11	2.07451e-09
AT5G18790	47.6072	-0.701851	0.247245	2.83869	0.00452989	0.019327
AT5G17610	156.232	-0.701744	0.165843	4.23137	2.32274e-05	0.000220041
AT3G07860	54.8628	-0.701647	0.24896	2.81831	0.00482771	0.020376
AT1G50490	37.5845	-0.700469	0.266305	2.63033	0.00853028	0.0325217
AT3G46020	42.1543	-0.700199	0.251826	2.78049	0.00542765	0.0224648
AT2G34170	397.093	-0.700111	0.233016	3.00456	0.00265963	0.0125227
AT5G24750	96.3344	-0.699691	0.17511	3.99572	6.44978e-05	0.000531366
AT1G61900	323.433	-0.698226	0.104117	6.70618	1.99781e-11	7.91496e-10
AT1G68220	109.478	-0.697304	0.173813	4.0118	6.02564e-05	0.00050157
AT3G45850	715.604	-0.697156	0.115455	6.03832	1.55725e-09	4.21761e-08
AT1G27410	113.173	-0.696383	0.155021	4.49219	7.04945e-06	7.7436e-05
AT5G50890	80.2791	-0.696367	0.194323	3.58356	0.000338941	0.00221715
AT5G46860	303.119	-0.695702	0.107768	6.45554	1.07833e-10	3.82319e-09
AT1G16780	334.395	-0.695581	0.1258	5.52925	3.21595e-08	6.54573e-07
AT1G76890	327.464	-0.695128	0.118366	5.87271	4.28734e-09	1.0493e-07
AT5G09690	55.6207	-0.695048	0.216313	3.21316	0.00131281	0.00694985
AT5G08400	105.3	-0.695021	0.193421	3.59332	0.000326495	0.00214664
AT4G10310	55.0541	-0.694048	0.26773	2.59235	0.00953237	0.0356447
AT2G33400	23.0688	-0.693684	0.266231	2.60557	0.00917217	0.0344841
AT1G52290	405.925	-0.693105	0.167886	4.12842	3.6526e-05	0.000324674
AT1G17640	62.4902	-0.692678	0.191663	3.61404	0.00030146	0.00200066
AT1G23390	1675.86	-0.69208	0.176891	3.91247	9.13554e-05	0.000720115
AT5G10620	97.6543	-0.691698	0.166717	4.14893	3.34031e-05	0.000299539
AT5G12930	44.2219	-0.691198	0.278733	2.47978	0.0131462	0.0458836
AT2G22730	60.2239	-0.690595	0.215843	3.19952	0.00137658	0.00723019
AT1G71790	122.156	-0.689918	0.153912	4.48257	7.37509e-06	8.05282e-05
AT2G05630	115.243	-0.689902	0.167267	4.12456	3.71447e-05	0.000329469
AT1G09390	255.6	-0.689333	0.114679	6.01098	1.84405e-09	4.90824e-08
AT4G16480	196.091	-0.689153	0.136899	5.03402	4.80293e-07	7.28468e-06
AT2G05075	43.2624	-0.688548	0.247276	2.78454	0.00536042	0.0222341
AT3G21230	146.337	-0.688082	0.182979	3.76045	0.000169609	0.00122266
AT2G24550	309.119	-0.687938	0.23515	2.92553	0.00343868	0.015418
AT3G62110	509.665	-0.687778	0.124463	5.52598	3.27657e-08	6.64218e-07
AT1G07750	435.279	-0.687425	0.122839	5.59614	2.19181e-08	4.64002e-07
AT4G04610	2488.73	-0.686883	0.153536	4.47375	7.68607e-06	8.35147e-05
AT5G16480	71.5185	-0.686816	0.269286	2.5505	0.0107568	0.0392321
AT5G05160	149.769	-0.686452	0.171532	4.0019	6.28366e-05	0.000520005
AT2G47680	59.4988	-0.686157	0.193303	3.54965	0.000385743	0.00247549
AT5G64260	187.966	-0.685734	0.239469	2.86356	0.00418909	0.0181304
AT1G26690	246.351	-0.685517	0.192061	3.56926	0.000357985	0.00231904
AT1G33780	245.511	-0.685178	0.137602	4.9794	6.37819e-07	9.37141e-06
AT1G29430	285.902	-0.68493	0.201789	3.39428	0.000688084	0.00404179
AT1G67830	261.02	-0.684406	0.149221	4.58652	4.50692e-06	5.23672e-05
AT1G10682	368.667	-0.68418	0.185806	3.68223	0.0002312	0.00159668
AT4G14050	32.9131	-0.683847	0.257627	2.65441	0.00794475	0.0307035
AT3G21530	33.5205	-0.683546	0.27311	2.50283	0.0123206	0.0435579
AT1G01430	1043.54	-0.683067	0.0907144	7.52986	5.07945e-14	3.12698e-12
AT1G68190	733.795	-0.682902	0.185573	3.67997	0.000233261	0.00160814
AT1G10522	329.695	-0.682803	0.222321	3.07124	0.00213171	0.010404
AT1G03230	164.287	-0.682717	0.124575	5.48036	4.24464e-08	8.38238e-07
AT3G09470	388.762	-0.682121	0.11398	5.98454	2.16998e-09	5.71512e-08
AT2G46310	83.9421	-0.68198	0.245159	2.78179	0.00540606	0.0223884
AT2G31800	760.559	-0.681434	0.16776	4.06195	4.8664e-05	0.00041701
AT4G19645	45.4307	-0.681024	0.223891	3.04176	0.00235197	0.0112896
AT1G64700	23.3808	-0.680559	0.275336	2.47174	0.0134458	0.0467261
AT1G23150	30.0339	-0.680397	0.254097	2.67771	0.00741277	0.0290272
AT1G77460	363.608	-0.680252	0.142291	4.78069	1.74692e-06	2.26919e-05
AT5G57910	36.1365	-0.679495	0.257812	2.63563	0.00839824	0.0320915
AT2G31865	84.9416	-0.679433	0.237778	2.85742	0.00427097	0.018449
AT3G04730	2799	-0.679121	0.119866	5.66569	1.46438e-08	3.23605e-07
AT3G43800	353.535	-0.678431	0.129628	5.23366	1.66188e-07	2.87024e-06
AT3G58100	64.0563	-0.678396	0.22858	2.96788	0.00299866	0.013825
AT5G64570	94.4684	-0.677718	0.199768	3.39252	0.000692528	0.0040568
AT4G02430	334.495	-0.676795	0.131063	5.16388	2.41886e-07	3.9954e-06
AT3G09070	95.3072	-0.67657	0.191346	3.53585	0.00040647	0.00259145
AT5G10740	82.678	-0.675745	0.228278	2.96019	0.00307453	0.0141159
AT5G14200	4181.62	-0.675558	0.188401	3.58575	0.000336114	0.00220153
AT5G49990	108.282	-0.675314	0.151195	4.46651	7.95066e-06	8.5786e-05
AT5G53730	96.9619	-0.674917	0.195349	3.45494	0.000550419	0.00334232
AT1G19660	3259.39	-0.674556	0.22851	2.95198	0.00315744	0.0144278
AT1G21090	33.4792	-0.674551	0.230676	2.92424	0.00345303	0.015465
AT1G02060	101.526	-0.672509	0.155309	4.33014	1.49013e-05	0.000149935
AT3G13750	3994.27	-0.670849	0.223953	2.99549	0.00274002	0.0128191
AT5G02370	42.6276	-0.670577	0.254489	2.635	0.00841377	0.0321447
AT3G18080	2841.35	-0.670532	0.174444	3.84383	0.00012113	0.000915615
AT4G40042	69.5077	-0.670394	0.200047	3.35119	0.000804652	0.00460477
AT5G59080	866.59	-0.670364	0.18156	3.69225	0.00022228	0.00154465
AT4G05330	67.6315	-0.669325	0.19914	3.36107	0.000776404	0.00447491
AT2G01990	121.425	-0.669166	0.158441	4.22344	2.40607e-05	0.000226791
AT1G55310	631.953	-0.669072	0.134425	4.97728	6.44853e-07	9.4602e-06
AT5G28770	693.363	-0.668822	0.201882	3.31294	0.000923202	0.00516237
AT3G50500	836.032	-0.668656	0.141921	4.71148	2.45925e-06	3.0447e-05
AT2G39180	40.9137	-0.668584	0.227768	2.93537	0.00333146	0.0150516
AT1G54040	1091.67	-0.668509	0.204392	3.27072	0.00107274	0.00585181
AT1G61600	130.639	-0.668472	0.151709	4.40629	1.05156e-05	0.000109672
AT1G77690	74.0703	-0.668416	0.231522	2.88705	0.00388876	0.0170587
AT4G17900	267.738	-0.667909	0.167619	3.98468	6.75709e-05	0.000553728
AT5G20650	53.6277	-0.667868	0.210607	3.17115	0.00151836	0.00786168
AT2G30740	393.861	-0.667768	0.0948874	7.03748	1.95745e-12	9.42066e-11
AT3G16720	103.075	-0.667688	0.258104	2.5869	0.00968446	0.0360916
AT4G24060	234.868	-0.667192	0.141781	4.70579	2.52884e-06	3.11932e-05
AT1G76240	305.949	-0.666912	0.16852	3.95747	7.57478e-05	0.000611006
AT4G23670	18170.6	-0.666834	0.131682	5.06398	4.10584e-07	6.35803e-06
AT3G12040	48.7617	-0.666597	0.247452	2.69384	0.00706348	0.0278501
AT3G57470	1262.32	-0.666563	0.113429	5.87646	4.19134e-09	1.02831e-07
AT3G55130	540.044	-0.665307	0.153686	4.329	1.49789e-05	0.000150597
AT1G72250	55.0069	-0.665137	0.255759	2.60064	0.00930496	0.0349049
AT1G02860	75.9684	-0.665077	0.212979	3.12273	0.00179182	0.00902385
AT1G26670	792.861	-0.665054	0.20184	3.29495	0.000984388	0.00543635
AT3G13000	210.968	-0.664942	0.167408	3.972	7.12729e-05	0.000580274
AT4G29900	1411.02	-0.664857	0.147133	4.51875	6.22046e-06	6.92777e-05
AT5G50400	447.475	-0.664604	0.121954	5.44962	5.04768e-08	9.81608e-07
AT2G39210	283.989	-0.66374	0.213687	3.10613	0.00189553	0.00944659
AT5G14450	145.366	-0.6636	0.179333	3.70038	0.000215274	0.00150272
AT2G31150	324.78	-0.663088	0.172638	3.84091	0.000122577	0.000923622
AT5G58520	267.512	-0.663083	0.110977	5.97498	2.30125e-09	6.0292e-08
AT1G60010	778.368	-0.661883	0.111275	5.94819	2.71124e-09	6.94914e-08
AT4G09405	48.118	-0.660953	0.250944	2.63387	0.00844183	0.0322396
AT4G39400	1742.55	-0.660586	0.112514	5.87116	4.32746e-09	1.05783e-07
AT5G33290	131.582	-0.660197	0.193956	3.40384	0.00066446	0.00393328
AT1G21440	1167.12	-0.659651	0.185131	3.56316	0.000366417	0.00236603
AT3G58930	90.1987	-0.659237	0.179011	3.68266	0.000230813	0.00159519
AT4G27070	334.998	-0.658609	0.177825	3.7037	0.00021248	0.00148736
AT1G18570	81.6222	-0.658056	0.228952	2.87421	0.00405037	0.017648
AT5G44400	797.564	-0.657268	0.204074	3.22074	0.00127859	0.00680638
AT5G60270	60.618	-0.656967	0.267609	2.45495	0.0140903	0.0485374
AT4G15260	141.983	-0.656249	0.225715	2.90743	0.00364415	0.0161596
AT2G38660	151.342	-0.656205	0.152519	4.30245	1.68919e-05	0.000166668
AT5G11090	348.335	-0.656197	0.110121	5.95884	2.54031e-09	6.56079e-08
AT2G27770	141.416	-0.656062	0.143065	4.58576	4.52328e-06	5.24726e-05
AT4G13880	67.5164	-0.655882	0.222283	2.95066	0.00317098	0.0144731
AT3G03870	405.839	-0.655773	0.211524	3.10022	0.00193374	0.00957618
AT5G46410	389.38	-0.655512	0.132582	4.94421	7.6454e-07	1.10001e-05
AT1G62380	3782.16	-0.655194	0.195511	3.35118	0.00080467	0.00460477
AT2G26110	336.721	-0.653956	0.135246	4.83532	1.32934e-06	1.78452e-05
AT3G04670	171.232	-0.653705	0.171818	3.80465	0.000142005	0.00104853
AT2G35820	487.21	-0.653624	0.101258	6.45502	1.08205e-10	3.82319e-09
AT1G07880	43.909	-0.653184	0.242655	2.69182	0.00710628	0.0279913
AT1G80650	238.096	-0.652836	0.143062	4.56329	5.03574e-06	5.75526e-05
AT1G18650	447.379	-0.652482	0.184778	3.53117	0.00041373	0.00263174
AT3G10720	599.449	-0.652465	0.194549	3.35373	0.000797312	0.00457143
AT4G19410	540.765	-0.652424	0.178625	3.65248	0.000259717	0.00176567
AT2G19090	42.5861	-0.65212	0.238313	2.7364	0.0062115	0.0250571
AT5G25770	112.53	-0.650897	0.189795	3.42948	0.000604749	0.00363157
AT5G35490	890.108	-0.650886	0.180876	3.59853	0.000320024	0.00210991
AT4G08160	90.8308	-0.650705	0.188184	3.45782	0.000544566	0.00331178
AT4G30110	1140.11	-0.650634	0.209054	3.11227	0.00185653	0.00927759
AT3G25717	562.467	-0.650228	0.162277	4.00689	6.15228e-05	0.000511666
AT4G00240	63.1076	-0.650184	0.23718	2.74131	0.00611941	0.0247901
AT3G61460	532.444	-0.650129	0.115387	5.63435	1.75718e-08	3.80829e-07
AT5G60040	199.199	-0.649903	0.139815	4.64832	3.34653e-06	4.0313e-05
AT1G27290	313.784	-0.649876	0.237493	2.7364	0.00621152	0.0250571
AT2G31890	434.916	-0.649776	0.119641	5.43104	5.60267e-08	1.07804e-06
AT5G53150	412.191	-0.649555	0.108974	5.96062	2.51287e-09	6.50956e-08
AT5G26850	347.945	-0.648579	0.145403	4.46055	8.17502e-06	8.7923e-05
AT1G78030	29.3198	-0.648156	0.259227	2.50034	0.0124075	0.0438081
AT3G27906	210.397	-0.647936	0.152001	4.26271	2.01963e-05	0.000195429
AT4G16520	1919.28	-0.647907	0.184589	3.51	0.00044811	0.00280859
AT4G29240	69.7397	-0.647891	0.246169	2.6319	0.00849086	0.0323899
AT1G59580	360.154	-0.647279	0.125923	5.14029	2.74322e-07	4.46501e-06
AT2G35880	445.81	-0.646777	0.132431	4.88389	1.04011e-06	1.43267e-05
AT2G28200	81.22	-0.646615	0.167294	3.86515	0.000111019	0.000850779
AT4G01900	553.02	-0.646459	0.108725	5.94582	2.75081e-09	7.02366e-08
AT4G24780	2887.73	-0.646162	0.122216	5.28705	1.24305e-07	2.20768e-06
AT4G22756	248.796	-0.645615	0.109679	5.88643	3.94628e-09	9.74144e-08
AT4G38932	394.956	-0.64509	0.172316	3.74364	0.000181377	0.00130048
AT4G12390	362.166	-0.644519	0.116242	5.54464	2.94557e-08	6.04445e-07
AT5G55060	266.379	-0.644166	0.118873	5.41893	5.99585e-08	1.14166e-06
AT5G38120	43.8436	-0.643563	0.257005	2.50409	0.0122768	0.0434384
AT1G20010	1808.49	-0.643256	0.142929	4.50052	6.77867e-06	7.47479e-05
AT3G07410	91.6602	-0.643008	0.205159	3.13419	0.00172326	0.00873558
AT3G54740	109.326	-0.642624	0.213094	3.01569	0.00256399	0.0121303
AT4G27435	71.1986	-0.642398	0.238365	2.69502	0.00703845	0.0277623
AT3G06380	503.45	-0.642384	0.129202	4.97194	6.62851e-07	9.68441e-06
AT5G06690	254.324	-0.642089	0.202921	3.16423	0.00155493	0.00801817
AT4G14680	711.514	-0.641933	0.120546	5.32522	1.0083e-07	1.82797e-06
AT3G59320	135.995	-0.641383	0.171539	3.73899	0.000184763	0.00132098
AT2G06925	143.04	-0.64114	0.239017	2.6824	0.00730956	0.0286683
AT1G11270	58.9138	-0.640812	0.221579	2.89203	0.00382762	0.0168568
AT4G12690	66.082	-0.640421	0.244801	2.61609	0.0088942	0.0336321
AT1G78370	6948.04	-0.639937	0.190177	3.36496	0.000765555	0.00442102
AT1G13100	166.453	-0.639244	0.134017	4.76986	1.84353e-06	2.3747e-05
AT1G61430	198.511	-0.639	0.125489	5.09208	3.54148e-07	5.58319e-06
AT5G09540	45.2165	-0.638866	0.22755	2.80759	0.00499145	0.0209655
AT3G20810	62.0745	-0.637564	0.259271	2.45906	0.0139302	0.0480848
AT1G06143	63.8404	-0.637384	0.181224	3.51712	0.000436264	0.00274682
AT1G61350	275.069	-0.637039	0.12485	5.10242	3.35342e-07	5.31255e-06
AT1G77480	302.365	-0.637023	0.112973	5.6387	1.71338e-08	3.72545e-07
AT1G72150	4887.99	-0.636996	0.222187	2.86694	0.00414457	0.0179571
AT4G38470	727.201	-0.63659	0.1973	3.2265	0.00125313	0.00669392
AT1G68238	139.45	-0.636349	0.213442	2.98136	0.00286969	0.0133222
AT2G22670	2845.14	-0.635974	0.0735776	8.64357	5.44812e-18	6.87663e-16
AT4G25100	16927.7	-0.635318	0.181116	3.5078	0.000451825	0.00282482
AT5G27820	104.468	-0.634954	0.201292	3.15439	0.00160834	0.00823625
AT1G70290	1588.38	-0.634889	0.224224	2.8315	0.00463306	0.0197077
AT1G05230	140.685	-0.634045	0.16315	3.88628	0.000101792	0.000789358
AT2G18300	1792.06	-0.634039	0.186377	3.40192	0.000669154	0.00395443
AT3G23480	489.833	-0.633829	0.156051	4.06169	4.87189e-05	0.000417302
AT3G26720	818.006	-0.633827	0.0951727	6.65976	2.74283e-11	1.05678e-09
AT3G27420	104.211	-0.633758	0.158295	4.00366	6.23699e-05	0.000517232
AT2G46610	93.4567	-0.632398	0.178159	3.54963	0.000385766	0.00247549
AT5G26800	179.252	-0.632344	0.173409	3.64654	0.000265799	0.00179788
AT5G15530	86.144	-0.631992	0.200702	3.1489	0.00163887	0.00837057
AT3G60300	576.181	-0.631837	0.151481	4.17107	3.03174e-05	0.000275937
AT1G67560	640.145	-0.630074	0.0917161	6.86983	6.42804e-12	2.78027e-10
AT1G09070	1321.8	-0.628762	0.0763857	8.23141	1.85015e-16	1.72701e-14
AT1G15215	123.715	-0.628546	0.150387	4.17952	2.92119e-05	0.000267451
AT1G67080	512.796	-0.628432	0.130412	4.81882	1.4441e-06	1.92314e-05
AT3G11760	113.701	-0.627819	0.183623	3.41906	0.000628371	0.00374763
AT4G18670	878.398	-0.627546	0.145382	4.31653	1.58501e-05	0.000158021
AT5G08380	242.026	-0.627499	0.158128	3.96831	7.23837e-05	0.000587411
AT5G16400	2620.03	-0.626834	0.100176	6.25731	3.91684e-10	1.20563e-08
AT5G23510	90.1573	-0.626349	0.204459	3.06344	0.00218806	0.0106145
AT4G29310	101.863	-0.62624	0.204152	3.06752	0.00215841	0.0105087
AT2G41010	79.951	-0.626167	0.172485	3.63028	0.000283116	0.00190092
AT3G44310	17519.6	-0.625903	0.144939	4.31839	1.57173e-05	0.000157165
AT5G27380	1166.88	-0.625664	0.120454	5.19423	2.05573e-07	3.44953e-06
AT3G01850	400.884	-0.625506	0.118843	5.26327	1.41512e-07	2.47819e-06
AT1G15400	357.919	-0.625403	0.136235	4.59061	4.41947e-06	5.1417e-05
AT1G08350	117.004	-0.62466	0.147596	4.23223	2.3139e-05	0.000219472
AT2G14520	180.44	-0.62372	0.17185	3.62944	0.000284036	0.00190589
AT2G43400	377.07	-0.623369	0.157392	3.9606	7.47612e-05	0.000605237
AT4G28060	388.112	-0.622943	0.11794	5.28185	1.27883e-07	2.26122e-06
AT1G15830	581.885	-0.622692	0.12176	5.11408	3.15267e-07	5.04835e-06
AT1G32700	374.561	-0.622677	0.224517	2.77341	0.00554723	0.0228223
AT1G68520	2178.88	-0.622146	0.161007	3.86408	0.000111507	0.000853484
AT5G41260	310.616	-0.621856	0.134725	4.61575	3.91672e-06	4.62925e-05
AT1G75500	2071.15	-0.621755	0.138125	4.50138	6.75141e-06	7.44882e-05
AT4G19050	84.0741	-0.621201	0.179899	3.45306	0.000554268	0.00336162
AT1G22170	50.1925	-0.620604	0.209327	2.96475	0.00302926	0.0139436
AT1G64360	548.15	-0.620152	0.217615	2.84977	0.00437514	0.0188232
AT4G17910	184.988	-0.619577	0.129588	4.78113	1.7431e-06	2.26863e-05
AT4G29210	338.601	-0.619563	0.180673	3.42919	0.000605389	0.00363324
AT3G54560	140.983	-0.619484	0.16531	3.74741	0.000178672	0.00128338
AT1G52720	138.74	-0.618632	0.165387	3.7405	0.000183652	0.00131539
AT4G27270	74.6649	-0.6185	0.199728	3.09672	0.00195677	0.00967011
AT1G54340	439.876	-0.618045	0.095957	6.44085	1.18806e-10	4.16839e-09
AT5G02690	32.1681	-0.617816	0.240673	2.56703	0.0102574	0.0377785
AT5G52070	109.041	-0.617577	0.154324	4.00181	6.28598e-05	0.000520005
AT4G04750	270.107	-0.61704	0.158176	3.90096	9.58106e-05	0.000749054
AT1G72416	77.222	-0.616567	0.195922	3.147	0.00164958	0.00841519
AT1G67050	272.112	-0.616394	0.129869	4.74626	2.0721e-06	2.62507e-05
AT4G26555	638.571	-0.616144	0.109878	5.60753	2.05238e-08	4.36327e-07
AT1G25560	212.84	-0.61551	0.23386	2.63195	0.00848957	0.0323899
AT2G40815	42.8737	-0.61549	0.226406	2.71852	0.00655743	0.0262049
AT1G20190	755.244	-0.615188	0.22292	2.75968	0.00578575	0.0236389
AT3G57830	151.649	-0.614931	0.180925	3.39883	0.000676758	0.00398763
AT5G46780	185.08	-0.614823	0.132992	4.623	3.78227e-06	4.4862e-05
AT4G33150	121.995	-0.614813	0.177666	3.46051	0.000539162	0.0032829
AT4G24610	102.229	-0.614016	0.155247	3.9551	7.65036e-05	0.000615865
AT1G53390	533.756	-0.613791	0.110875	5.53588	3.09661e-08	6.34142e-07
AT1G06760	720.186	-0.61361	0.15656	3.91933	8.87947e-05	0.000701859
AT5G63970	78.9588	-0.6136	0.217009	2.82754	0.00469078	0.0198942
AT1G33080	152.738	-0.613253	0.19395	3.16191	0.00156739	0.00806357
AT1G52710	73.3174	-0.612677	0.191299	3.20272	0.00136137	0.00715759
AT2G30870	2622.54	-0.612281	0.151377	4.04474	5.2382e-05	0.000444317
AT3G59100	208.568	-0.611893	0.169872	3.60208	0.000315682	0.00208814
AT2G16650	85.4939	-0.610988	0.244599	2.49792	0.0124926	0.0440525
AT5G26600	466.375	-0.610843	0.128479	4.75442	1.99014e-06	2.53749e-05
AT5G63920	65.7692	-0.610281	0.211188	2.88975	0.00385548	0.0169497
AT3G21950	302.14	-0.609497	0.209113	2.91467	0.00356062	0.0158655
AT1G16340	200.386	-0.60937	0.150674	4.04429	5.24812e-05	0.000444783
AT2G34010	66.9423	-0.608726	0.210214	2.89574	0.0037827	0.0166773
AT5G14390	314.986	-0.608573	0.125825	4.83668	1.32025e-06	1.7735e-05
AT1G05810	78.3981	-0.607871	0.183641	3.31011	0.000932593	0.00520618
AT1G33050	631.932	-0.607772	0.180386	3.36929	0.000753622	0.00435988
AT2G46980	83.8894	-0.607714	0.171722	3.53894	0.000401743	0.00256607
AT4G01700	53.8332	-0.607385	0.242316	2.50658	0.0121905	0.0432279
AT5G00980	49.7735	-0.607196	0.232594	2.61054	0.00903995	0.03407
AT4G33770	136.845	-0.607154	0.191476	3.17091	0.00151961	0.00786617
AT3G43920	159.563	-0.607087	0.13336	4.55226	5.30729e-06	6.02103e-05
AT1G13280	539.053	-0.607045	0.152268	3.9867	6.69992e-05	0.000550166
AT5G48412	376.479	-0.605634	0.191653	3.16005	0.00157741	0.00810246
AT4G19660	634.658	-0.605606	0.0954626	6.34391	2.24009e-10	7.29811e-09
AT1G56210	73.9163	-0.605412	0.193725	3.12511	0.00177738	0.00896461
AT2G27060	555.697	-0.605205	0.128404	4.71329	2.43754e-06	3.02529e-05
AT5G51170	72.2956	-0.604938	0.180808	3.34575	0.000820592	0.0046812
AT3G62650	526.279	-0.604027	0.198961	3.03591	0.00239812	0.0114754
AT3G43790	57.3019	-0.603891	0.222012	2.72009	0.00652649	0.0260969
AT4G30690	905.989	-0.60375	0.201031	3.00327	0.00267093	0.012558
AT1G21920	689.069	-0.603699	0.223259	2.70403	0.00685037	0.0271969
AT2G43820	601.666	-0.602787	0.203693	2.9593	0.00308343	0.0141281
AT5G50915	302.034	-0.602672	0.153258	3.9324	8.4101e-05	0.000669505
AT3G21790	500.511	-0.602298	0.112644	5.34692	8.94615e-08	1.64264e-06
AT3G07540	317.943	-0.60152	0.160085	3.7575	0.000171618	0.00123537
AT1G58030	908.465	-0.601445	0.140974	4.26634	1.98707e-05	0.000192556
AT1G65032	38.147	-0.600769	0.242336	2.47908	0.0131722	0.0459454
AT5G62550	63.8712	-0.600592	0.23211	2.58753	0.00966658	0.0360324
AT3G53800	561.491	-0.600519	0.158174	3.79656	0.000146717	0.00108094
AT5G62900	47.6989	-0.600461	0.237188	2.53158	0.0113549	0.0408608
AT1G35910	40.3688	-0.6002	0.217529	2.75917	0.00579477	0.0236661
AT1G74740	71.8545	-0.599972	0.191928	3.12602	0.00177188	0.00893912
AT3G01930	171.552	-0.599275	0.176238	3.40037	0.000672937	0.00397211
AT3G59760	636.9	-0.59908	0.0980581	6.10944	9.99804e-10	2.82606e-08
AT5G20950	778.148	-0.598887	0.112137	5.34068	9.25962e-08	1.69091e-06
AT1G14360	241.651	-0.598538	0.165955	3.60663	0.000310199	0.0020539
AT2G16750	185.381	-0.598442	0.171101	3.49759	0.000469476	0.0029161
AT4G30860	35.5332	-0.598351	0.23103	2.58992	0.00959981	0.035863
AT5G47250	121.943	-0.598169	0.162615	3.67844	0.000234661	0.00161558
AT3G57880	234.472	-0.598166	0.131973	4.53248	5.82956e-06	6.53959e-05
AT1G45229	76.2117	-0.598132	0.173691	3.44367	0.000573884	0.00346697
AT5G64330	687.572	-0.598102	0.109132	5.48052	4.24068e-08	8.38238e-07
AT3G18930	58.7349	-0.597802	0.20812	2.87239	0.00407379	0.0177193
AT5G49440	1096.93	-0.59761	0.116758	5.11835	3.08227e-07	4.94468e-06
AT4G31270	76.5587	-0.596734	0.220923	2.70109	0.00691122	0.027403
AT3G58720	167.818	-0.596628	0.128632	4.63824	3.51384e-06	4.21262e-05
AT2G22570	55.3069	-0.595993	0.192985	3.08828	0.00201317	0.00991713
AT5G62930	284.932	-0.595705	0.117286	5.07909	3.79249e-07	5.9323e-06
AT4G36540	1089.04	-0.595685	0.111395	5.3475	8.91784e-08	1.63894e-06
AT3G16640	15527.5	-0.595367	0.103121	5.77345	7.76627e-09	1.82294e-07
AT1G65930	4034.82	-0.595075	0.108241	5.49767	3.84844e-08	7.66974e-07
AT1G64370	9278.44	-0.594877	0.138172	4.30534	1.66733e-05	0.000164755
AT5G26980	152.892	-0.594069	0.130897	4.53844	5.66724e-06	6.37891e-05
AT2G20230	1397.65	-0.593144	0.084063	7.05594	1.71439e-12	8.33079e-11
AT2G17710	51.1359	-0.592955	0.224775	2.63799	0.00833996	0.0319295
AT4G25835	52.0529	-0.59287	0.215186	2.75515	0.00586648	0.0238982
AT1G76150	439.965	-0.591477	0.116966	5.05684	4.2627e-07	6.57052e-06
AT1G35460	270.188	-0.591279	0.116256	5.08599	3.65719e-07	5.74752e-06
AT3G50845	68.549	-0.590896	0.200796	2.94277	0.00325293	0.0147766
AT1G62040	434.314	-0.59084	0.120961	4.88455	1.03665e-06	1.42889e-05
AT4G19870	125.249	-0.590808	0.152952	3.8627	0.00011214	0.000857021
AT5G62680	708.416	-0.590787	0.140596	4.20202	2.64546e-05	0.000245792
AT5G13300	677.662	-0.590746	0.0994258	5.94158	2.8229e-09	7.18944e-08
AT5G42440	63.2103	-0.59016	0.20672	2.85487	0.00430546	0.0185786
AT5G65490	336.951	-0.589908	0.128763	4.58136	4.61952e-06	5.34038e-05
AT2G37120	123.943	-0.589887	0.153097	3.85302	0.000116671	0.000887596
AT5G47610	140.744	-0.589862	0.212507	2.77573	0.00550784	0.0227208
AT3G57080	180.917	-0.589464	0.129191	4.56273	5.04934e-06	5.76423e-05
AT4G00335	159.242	-0.589398	0.142077	4.14844	3.34753e-05	0.000299918
AT5G63500	72.3223	-0.588974	0.222757	2.64402	0.00819281	0.0314984
AT4G02710	50.6137	-0.588604	0.230621	2.55226	0.0107027	0.0390816
AT5G66310	328.341	-0.588287	0.219259	2.68307	0.00729507	0.0286171
AT1G76460	382.268	-0.588101	0.149012	3.94667	7.92444e-05	0.000634872
AT2G30500	283.32	-0.587268	0.152416	3.85306	0.000116653	0.000887596
AT1G75120	92.205	-0.586645	0.197764	2.9664	0.00301312	0.0138757
AT3G27770	765.942	-0.586377	0.141871	4.13316	3.57807e-05	0.000318723
AT1G33615	55.5201	-0.586279	0.224108	2.61605	0.00889527	0.0336321
AT5G62980	190.646	-0.586094	0.185225	3.16422	0.00155497	0.00801817
AT1G20510	943.574	-0.585708	0.194047	3.01838	0.00254127	0.012054
AT5G16150	2225.51	-0.585647	0.1643	3.5645	0.000364552	0.0023555
AT1G70620	2005.72	-0.585027	0.0656442	8.91209	5.00784e-19	7.55656e-17
AT4G14145	149.339	-0.584828	0.149455	3.91307	9.11285e-05	0.000718608
AT5G24660	312.348	-0.584547	0.152563	3.83151	0.000127361	0.000955516
AT3G56240	4009.49	-0.584423	0.166278	3.51473	0.000440199	0.00276592
AT3G12300	206.261	-0.584371	0.12224	4.78054	1.74826e-06	2.26946e-05
AT1G11380	81.9231	-0.584317	0.167326	3.49209	0.000479259	0.00296859
AT4G01610	844.739	-0.584256	0.153296	3.8113	0.000138237	0.00102372
AT5G22930	40.1506	-0.584073	0.236321	2.47152	0.0134538	0.046746
AT4G17070	144.477	-0.583856	0.185923	3.14031	0.00168769	0.00858777
AT2G44290	457.197	-0.58382	0.169606	3.44222	0.000576962	0.00348242
AT5G65660	199.946	-0.583371	0.174629	3.34062	0.000835916	0.00475387
AT3G55960	618.699	-0.582954	0.107271	5.4344	5.4981e-08	1.05995e-06
AT1G19680	307.683	-0.582931	0.153362	3.801	0.000144111	0.00106251
AT3G26680	36.9989	-0.582852	0.223133	2.61213	0.00899797	0.0339378
AT2G29340	846.47	-0.582723	0.171199	3.40378	0.000664594	0.00393328
AT5G46700	111.11	-0.582472	0.208652	2.7916	0.00524486	0.0218652
AT1G02350	45.994	-0.582182	0.22248	2.61679	0.00887611	0.0335786
AT1G66190	105.614	-0.582042	0.17492	3.32747	0.000876383	0.00493212
AT4G23330	270.304	-0.58198	0.110893	5.24814	1.5364e-07	2.6673e-06
AT4G22760	42.3658	-0.580839	0.226032	2.56972	0.0101782	0.0375282
AT2G23700	48.1583	-0.580567	0.229201	2.533	0.011309	0.0407689
AT2G30520	5562.62	-0.580343	0.116474	4.9826	6.27371e-07	9.23479e-06
AT1G63300	83.1032	-0.580322	0.227991	2.54537	0.0109162	0.0396664
AT1G72330	76.2438	-0.579945	0.201832	2.87341	0.00406071	0.0176816
AT1G71696	296.965	-0.579381	0.118202	4.90161	9.50555e-07	1.32477e-05
AT2G03980	557.207	-0.579261	0.208818	2.774	0.00553711	0.0227947
AT1G65900	116.477	-0.578321	0.191416	3.02128	0.00251706	0.0119562
AT3G07420	158.01	-0.577808	0.176541	3.27293	0.00106438	0.00580935
AT5G13980	1939.01	-0.577421	0.0753845	7.65969	1.86387e-14	1.26372e-12
AT5G13090	355.01	-0.577056	0.101972	5.65895	1.52305e-08	3.35522e-07
AT2G46510	310.457	-0.576677	0.13101	4.40179	1.07362e-05	0.000111582
AT3G54090	640.186	-0.576073	0.205218	2.80713	0.0049985	0.0209864
AT1G77630	133.24	-0.575751	0.225876	2.54897	0.0108042	0.039359
AT5G20520	405.362	-0.575656	0.135114	4.26052	2.03948e-05	0.000197065
AT1G72450	1397.36	-0.575042	0.166079	3.46246	0.000535256	0.00326407
AT5G07460	922.537	-0.574651	0.176195	3.26144	0.00110848	0.00602547
AT5G18490	118.961	-0.574255	0.181967	3.15582	0.00160047	0.0082043
AT4G11450	63.8868	-0.57415	0.202252	2.83879	0.00452851	0.019327
AT1G79670	193.869	-0.573976	0.140413	4.08776	4.35563e-05	0.000378739
AT4G35230	672.971	-0.573879	0.11489	4.99504	5.88234e-07	8.70595e-06
AT1G13570	175.078	-0.573033	0.129448	4.42674	9.567e-06	0.000100946
AT3G17350	123.648	-0.572865	0.17503	3.27296	0.00106427	0.00580935
AT1G09430	794.29	-0.572834	0.130087	4.40348	1.06528e-05	0.000110888
AT1G01940	115.876	-0.572697	0.181014	3.16382	0.00155712	0.00802376
AT2G17525	147.35	-0.572483	0.136078	4.20703	2.58744e-05	0.00024141
AT4G34160	121.99	-0.572467	0.218856	2.61573	0.0089037	0.0336462
AT3G17611	117.232	-0.571953	0.166656	3.43194	0.000599274	0.00360192
AT1G60260	1115.69	-0.571682	0.140902	4.05731	4.96412e-05	0.000424116
AT4G25120	105.284	-0.571635	0.186205	3.06992	0.00214116	0.0104476
AT3G45290	75.4066	-0.571219	0.201551	2.83412	0.00459516	0.0195589
AT3G61670	319.042	-0.570634	0.120176	4.7483	2.05133e-06	2.60064e-05
AT1G57980	113.271	-0.57022	0.22694	2.51265	0.0119827	0.0426235
AT3G06130	312.408	-0.569985	0.18152	3.14006	0.00168913	0.00859293
AT1G01300	552.003	-0.569888	0.161038	3.53883	0.0004019	0.00256625
AT2G42290	73.5802	-0.569434	0.187908	3.03039	0.00244238	0.0116483
AT3G47360	69.762	-0.568752	0.185726	3.06232	0.00219626	0.0106491
AT1G09960	49.3457	-0.568643	0.212833	2.67178	0.0075449	0.0294417
AT5G43810	489.585	-0.56834	0.0969858	5.86003	4.62771e-09	1.12438e-07
AT4G09890	475.35	-0.568288	0.118511	4.79521	1.62502e-06	2.13572e-05
AT5G57940	878.3	-0.568287	0.0725088	7.83749	4.59633e-15	3.54784e-13
AT4G17245	176.876	-0.567787	0.175781	3.23007	0.00123758	0.00662497
AT2G36460	1820.97	-0.567785	0.1044	5.43853	5.37214e-08	1.03867e-06
AT4G16957	191.418	-0.567647	0.173145	3.27845	0.0010438	0.00571414
AT1G12320	98.9773	-0.567542	0.210371	2.69781	0.00697967	0.0275901
AT4G25600	117.685	-0.566821	0.143159	3.95939	7.51419e-05	0.000606851
AT2G17450	295.045	-0.566792	0.13904	4.07648	4.57224e-05	0.000395348
AT2G37640	587.697	-0.565762	0.231696	2.44183	0.014613	0.0499777
AT1G69720	224.633	-0.565535	0.222353	2.54341	0.0109776	0.0398172
AT1G61970	147.613	-0.565522	0.135199	4.18288	2.87843e-05	0.00026426
AT3G13690	972.086	-0.56546	0.146022	3.87244	0.000107752	0.000829977
AT4G32200	183.777	-0.565388	0.147576	3.83118	0.000127532	0.000956088
AT1G43580	346.226	-0.565334	0.0950163	5.94987	2.68359e-09	6.89589e-08
AT3G06950	170.038	-0.565086	0.142857	3.9556	7.63414e-05	0.000615052
AT1G23960	497.442	-0.564965	0.113563	4.97489	6.52853e-07	9.57056e-06
AT4G00720	1342.65	-0.564889	0.0980716	5.75996	8.41317e-09	1.95421e-07
AT3G56200	375.684	-0.56358	0.146473	3.84768	0.000119241	0.000904404
AT2G43720	35.5603	-0.563537	0.229232	2.45837	0.0139569	0.0481437
AT3G49120	861.313	-0.56347	0.228409	2.46694	0.0136274	0.0472159
AT1G56720	288.182	-0.563292	0.17508	3.21733	0.00129387	0.0068677
AT2G34470	516.663	-0.562913	0.151591	3.71336	0.000204529	0.00144011
AT2G46220	3559.89	-0.562768	0.155307	3.62359	0.000290544	0.00194494
AT1G12430	297.48	-0.562722	0.112457	5.00389	5.61848e-07	8.36449e-06
AT1G06500	47.4941	-0.562245	0.219465	2.56189	0.0104106	0.0382374
AT1G22830	56.6128	-0.561874	0.221233	2.53973	0.0110937	0.0401088
AT2G48010	101.402	-0.561567	0.20137	2.78873	0.00529146	0.0220227
AT4G19530	2080.55	-0.560949	0.0870597	6.44327	1.16923e-10	4.10951e-09
AT3G51430	191.141	-0.560719	0.223887	2.50448	0.0122633	0.0433983
AT3G02875	109.036	-0.560716	0.162567	3.44913	0.000562386	0.00340571
AT5G66180	138.343	-0.560485	0.15437	3.63079	0.000282552	0.00189841
AT5G67200	62.7684	-0.560175	0.221717	2.52653	0.0115194	0.0413196
AT1G61500	227.957	-0.560061	0.140061	3.99869	6.36948e-05	0.000525613
AT5G56590	156.106	-0.559719	0.141204	3.96391	7.37321e-05	0.000597388
AT1G19220	243.813	-0.559049	0.159858	3.49716	0.000470236	0.00291901
AT2G43350	153.291	-0.559018	0.160653	3.47966	0.000502057	0.00308694
AT4G14540	841.949	-0.558553	0.11033	5.06254	4.13699e-07	6.3964e-06
AT5G57340	290.387	-0.558084	0.200864	2.77842	0.00546244	0.0225846
AT4G36710	146.706	-0.557397	0.170506	3.26908	0.00107897	0.00587783
AT2G32090	612.622	-0.557308	0.122659	4.54356	5.5313e-06	6.2434e-05
AT2G15292	333.126	-0.557091	0.144915	3.84426	0.000120917	0.000914347
AT4G22690	2320.15	-0.556231	0.14516	3.83185	0.000127183	0.000954539
AT3G14920	412.619	-0.556086	0.0957617	5.80697	6.36131e-09	1.51262e-07
AT3G19810	611.54	-0.555584	0.099922	5.56018	2.695e-08	5.57012e-07
AT1G72820	413.16	-0.555276	0.144236	3.84976	0.000118233	0.000897778
AT1G63020	218.738	-0.555135	0.178092	3.11713	0.00182622	0.00915576
AT4G13400	69.0085	-0.554675	0.205686	2.69671	0.0070029	0.0276438
AT1G06010	127.254	-0.554573	0.169313	3.27544	0.00105498	0.00576877
AT1G49170	57.9324	-0.554451	0.198859	2.78816	0.00530078	0.0220525
AT2G38970	259.124	-0.554187	0.13638	4.06356	4.83302e-05	0.000414681
AT4G04040	1806.72	-0.554176	0.115646	4.79203	1.65106e-06	2.16428e-05
AT1G68300	277.048	-0.554023	0.12405	4.46612	7.96513e-06	8.58958e-05
AT3G01680	949.144	-0.553936	0.131629	4.20831	2.57293e-05	0.000240168
AT1G79720	232.173	-0.553908	0.119392	4.63942	3.49383e-06	4.19364e-05
AT1G70520	397.576	-0.5538	0.15381	3.60054	0.000317551	0.00209912
AT4G01600	134.679	-0.553731	0.218028	2.53973	0.0110939	0.0401088
AT5G65310	946.44	-0.55352	0.162864	3.39865	0.000677183	0.00398896
AT3G22060	567.643	-0.552256	0.131541	4.19837	2.68845e-05	0.000248982
AT5G35370	116.47	-0.552136	0.154114	3.58264	0.000340142	0.00222283
AT4G38490	271.988	-0.551626	0.115065	4.79405	1.63448e-06	2.14395e-05
AT2G29980	922.352	-0.551569	0.171972	3.20732	0.0013398	0.0070629
AT3G28140	189.911	-0.551537	0.179864	3.06641	0.00216648	0.0105399
AT5G39850	181.095	-0.551425	0.186925	2.94998	0.00317791	0.0144949
AT5G63990	54.4256	-0.550939	0.209856	2.62532	0.00865668	0.0328787
AT3G26890	1092.94	-0.550744	0.128735	4.27814	1.88464e-05	0.000183624
AT3G58900	174.627	-0.550726	0.141437	3.89379	9.86895e-05	0.000767972
AT2G38750	487.697	-0.550598	0.221081	2.49048	0.0127569	0.0448134
AT1G12440	746.919	-0.550033	0.167842	3.27708	0.00104887	0.00574032
AT2G47020	76.5597	-0.549373	0.175816	3.1247	0.00177988	0.00897383
AT2G29525	97.0212	-0.54928	0.188668	2.91135	0.00359869	0.0159961
AT3G61210	1025.23	-0.548825	0.166808	3.29016	0.0010013	0.00551102
AT1G78750	70.8203	-0.548681	0.199044	2.75658	0.00584099	0.0238113
AT3G16850	1493.53	-0.548659	0.105834	5.18415	2.17004e-07	3.62619e-06
AT5G66910	189.688	-0.548508	0.181789	3.01727	0.00255063	0.0120895
AT1G08680	507.224	-0.548325	0.0857466	6.39471	1.60852e-10	5.48072e-09
AT5G13760	256.305	-0.548122	0.162333	3.37653	0.000734056	0.00425651
AT1G50480	3206.24	-0.54795	0.146645	3.73657	0.000186547	0.00133137
AT4G22130	222.698	-0.547768	0.133111	4.11514	3.86951e-05	0.000341801
AT5G08330	1021.08	-0.54752	0.146825	3.72907	0.000192188	0.00136774
AT1G09140	1428.98	-0.547442	0.0803219	6.81561	9.38677e-12	3.92465e-10
AT1G27130	1066.81	-0.547329	0.156386	3.49986	0.000465497	0.00289407
AT5G47910	961.896	-0.547177	0.1374	3.98235	6.82359e-05	0.000558494
AT1G70980	297.674	-0.547058	0.129091	4.23777	2.25754e-05	0.000215029
AT5G42850	466.142	-0.547011	0.11172	4.89628	9.76683e-07	1.35647e-05
AT5G10946	92.8608	-0.546973	0.200677	2.72564	0.0064177	0.0257336
AT2G36900	193.108	-0.546681	0.153934	3.55141	0.000383172	0.00246076
AT4G33740	521.228	-0.544631	0.12532	4.34593	1.38688e-05	0.000140644
AT1G80690	99.7054	-0.544085	0.185237	2.93724	0.0033115	0.014985
AT5G20040	480.849	-0.543985	0.150466	3.61534	0.000299951	0.00199394
AT4G35050	64.1327	-0.543883	0.220237	2.46953	0.013529	0.0469223
AT2G42900	100.157	-0.54374	0.210086	2.58819	0.00964829	0.0359776
AT1G11180	275.948	-0.543374	0.151501	3.5866	0.000335022	0.0021958
AT4G30940	75.8108	-0.543132	0.18346	2.96049	0.00307154	0.0141059
AT2G28070	374.532	-0.542704	0.113911	4.76426	1.89544e-06	2.43376e-05
AT1G11440	325.493	-0.542531	0.160865	3.37259	0.000744642	0.00431415
AT1G74030	119.918	-0.542489	0.146375	3.70615	0.000210434	0.00147561
AT2G18328	603.86	-0.542442	0.166726	3.25349	0.00113996	0.00616819
AT1G09750	1646.33	-0.542405	0.157861	3.43596	0.000590455	0.00355211
AT1G44770	626.862	-0.54232	0.148288	3.65722	0.000254968	0.00173927
AT2G33740	327.075	-0.542299	0.0971931	5.5796	2.41073e-08	5.06078e-07
AT3G55090	65.729	-0.542138	0.196112	2.76443	0.00570223	0.0233547
AT1G28320	656.15	-0.542106	0.0996085	5.44237	5.25778e-08	1.01755e-06
AT1G60700	104.519	-0.541817	0.163044	3.32314	0.000890114	0.00499824
AT5G40610	400.333	-0.541813	0.128462	4.21768	2.46827e-05	0.000232126
AT5G43920	554.524	-0.541792	0.103734	5.22289	1.76153e-07	3.02414e-06
AT4G08685	508.204	-0.541694	0.120998	4.47689	7.57399e-06	8.24308e-05
AT1G77370	362.398	-0.541392	0.142013	3.81228	0.000137692	0.00102006
AT2G38810	52.023	-0.540865	0.219984	2.45866	0.0139458	0.0481221
AT5G03455	440.345	-0.540801	0.123601	4.37539	1.21215e-05	0.000124433
AT4G21326	227.377	-0.540228	0.149611	3.61089	0.000305146	0.00202245
AT4G39940	3013.28	-0.539738	0.214413	2.51729	0.0118263	0.0421942
AT2G46030	534.15	-0.539614	0.111702	4.83084	1.3596e-06	1.82027e-05
AT5G50375	179.56	-0.539247	0.150088	3.59288	0.000327039	0.0021491
AT3G02510	229.251	-0.53909	0.14487	3.72121	0.000198271	0.00140208
AT1G74180	169.459	-0.538998	0.121822	4.42446	9.66846e-06	0.00010191
AT1G21650	205.193	-0.538909	0.17435	3.09097	0.00199505	0.00984233
AT4G24730	144.18	-0.538372	0.13793	3.90323	9.49193e-05	0.000743824
AT3G16857	490.771	-0.538234	0.187713	2.86733	0.00413956	0.0179432
AT5G14800	730.218	-0.538117	0.167691	3.20897	0.0013321	0.00703526
AT4G36515	141.152	-0.537809	0.150253	3.57934	0.000344456	0.00224591
AT1G16930	59.919	-0.537795	0.215745	2.49273	0.0126765	0.0445619
AT5G66040	2929.55	-0.536913	0.136615	3.93013	8.48985e-05	0.000674495
AT3G05130	70.4525	-0.536848	0.206949	2.59411	0.00948371	0.0354826
AT2G27385	1454.43	-0.536517	0.192003	2.79432	0.00520086	0.0217179
AT5G18650	778.936	-0.536389	0.145023	3.69865	0.000216753	0.001512
AT4G28710	571.728	-0.535879	0.126719	4.22889	2.34845e-05	0.000222002
AT5G45490	661.19	-0.535745	0.116621	4.59388	4.35076e-06	5.07648e-05
AT2G24250	54.1414	-0.534455	0.204779	2.60991	0.00905673	0.0341204
AT1G05970	83.2069	-0.534187	0.183242	2.9152	0.00355455	0.0158419
AT1G19770	731.02	-0.533967	0.12348	4.32432	1.53006e-05	0.000153304
AT3G47540	314.355	-0.533737	0.124165	4.29861	1.71873e-05	0.000169167
AT2G30424	140.179	-0.533587	0.201738	2.64495	0.0081704	0.0314436
AT3G20060	799.405	-0.532749	0.102943	5.17519	2.27676e-07	3.78248e-06
AT4G22120	215.715	-0.532678	0.129711	4.10666	4.01424e-05	0.000352568
AT1G22030	59.1492	-0.532609	0.194574	2.73731	0.00619441	0.0250132
AT5G44860	223.971	-0.532568	0.11093	4.80092	1.57941e-06	2.08534e-05
AT4G25940	314.675	-0.53249	0.17059	3.12146	0.00179957	0.00905381
AT1G30320	143.313	-0.532391	0.149685	3.55675	0.000375476	0.00241753
AT1G75130	242.489	-0.532041	0.124636	4.26875	1.96573e-05	0.000190673
AT5G65760	447.077	-0.531841	0.109165	4.87189	1.10537e-06	1.51321e-05
AT4G22190	701.981	-0.531762	0.13274	4.00604	6.17439e-05	0.000513101
AT5G40970	74.2073	-0.531728	0.198442	2.67952	0.00737284	0.0288939
AT1G78060	630.393	-0.531643	0.112085	4.7432	2.10367e-06	2.6586e-05
AT4G19880	244.227	-0.53065	0.149617	3.54672	0.000390054	0.00249856
AT1G72650	493.143	-0.530117	0.129933	4.07991	4.50527e-05	0.00039023
AT3G21260	224.664	-0.529845	0.135436	3.91215	9.14788e-05	0.000720804
AT2G40000	543.142	-0.529479	0.214978	2.46295	0.01378	0.0476402
AT1G54250	85.2329	-0.529307	0.214036	2.47298	0.0133991	0.046588
AT5G10150	464.138	-0.529171	0.107794	4.90909	9.15008e-07	1.28325e-05
AT1G55880	122.808	-0.528975	0.155853	3.39407	0.000688621	0.00404328
AT4G25690	184.268	-0.528871	0.138001	3.83237	0.000126912	0.000952864
AT5G28300	354.441	-0.528602	0.109852	4.81195	1.49468e-06	1.9826e-05
AT1G74950	314.711	-0.52852	0.16918	3.12401	0.00178402	0.00899074
AT3G28940	1936.96	-0.528024	0.160367	3.2926	0.000992641	0.00546838
AT2G39870	321.101	-0.527725	0.183079	2.88251	0.00394527	0.0172839
AT4G29820	104.576	-0.527652	0.169719	3.10898	0.00187734	0.00937224
AT5G63620	386.434	-0.527207	0.181043	2.91206	0.00359053	0.0159668
AT2G28080	92.2031	-0.526477	0.177214	2.97085	0.00296977	0.0137139
AT3G57030	405.927	-0.526204	0.131484	4.00203	6.28013e-05	0.000520005
AT5G40850	1567.22	-0.525929	0.190765	2.75694	0.00583452	0.0237994
AT5G56020	111.593	-0.525082	0.161096	3.25943	0.00111637	0.00605686
AT5G07860	376.731	-0.524921	0.108082	4.8567	1.19357e-06	1.61959e-05
AT2G04030	6805.65	-0.524893	0.194051	2.70492	0.00683213	0.0271513
AT2G19170	169.447	-0.524812	0.156214	3.35956	0.000780656	0.00449555
AT5G67150	531.759	-0.524577	0.121568	4.3151	1.59532e-05	0.000158576
AT3G59110	441.23	-0.524466	0.14912	3.51707	0.000436338	0.00274682
AT3G14990	371.99	-0.524165	0.174753	2.99946	0.00270457	0.0126895
AT4G17730	382.254	-0.523593	0.154925	3.37966	0.000725744	0.00422172
AT3G51670	689.209	-0.523485	0.147502	3.549	0.000386703	0.00248026
AT5G07360	246.131	-0.52342	0.113989	4.59185	4.39335e-06	5.11428e-05
AT2G46225	224.32	-0.523237	0.127461	4.10508	4.0417e-05	0.000354669
AT1G32740	105.449	-0.522952	0.200945	2.60247	0.00925558	0.0347522
AT3G60210	562.411	-0.522477	0.105043	4.97392	6.56116e-07	9.61138e-06
AT3G09410	413.848	-0.522333	0.103119	5.06536	4.07635e-07	6.31724e-06
AT4G07455	155.577	-0.522116	0.133504	3.91087	9.19629e-05	0.000723766
AT5G18020	213.359	-0.522	0.172845	3.02004	0.0025274	0.0120025
AT5G47760	252.46	-0.521654	0.123723	4.21631	2.48329e-05	0.000233102
AT4G32000	114.121	-0.521237	0.187463	2.78048	0.00542787	0.0224648
AT4G14660	57.5785	-0.520336	0.187285	2.77831	0.00546419	0.0225872
AT1G19130	140.203	-0.520167	0.142726	3.64452	0.000267893	0.00181083
AT4G18710	1676.82	-0.519715	0.118839	4.37326	1.22402e-05	0.000125459
AT3G14450	153.122	-0.519578	0.153794	3.37839	0.000729109	0.00423762
AT1G16570	179.786	-0.519127	0.117417	4.42122	9.81434e-06	0.000103231
AT5G04700	65.4557	-0.519084	0.187938	2.762	0.00574489	0.0235007
AT2G02765	158.045	-0.518688	0.131673	3.93921	8.17503e-05	0.000653384
AT1G79560	1260.42	-0.518491	0.147937	3.50481	0.00045694	0.00284976
AT5G34850	2821.97	-0.518368	0.0740709	6.99827	2.59147e-12	1.21921e-10
AT5G23210	514.504	-0.517719	0.106505	4.861	1.16794e-06	1.58911e-05
AT3G04910	1231.42	-0.517485	0.172642	2.99745	0.0027225	0.0127569
AT3G10630	77.7715	-0.517265	0.182048	2.84137	0.00449206	0.019222
AT5G50740	453.051	-0.517263	0.181167	2.85517	0.00430133	0.0185682
AT5G40890	1936.25	-0.516855	0.156093	3.31119	0.000928992	0.0051904
AT5G65205	77.9292	-0.516778	0.17192	3.00592	0.00264775	0.0124736
AT2G41710	218.825	-0.516548	0.149039	3.46585	0.000528561	0.00323011
AT1G49180	182.589	-0.516292	0.143019	3.60994	0.000306268	0.00202922
AT5G40160	464.62	-0.516273	0.103937	4.96719	6.79286e-07	9.90741e-06
AT3G22190	211.738	-0.516095	0.13642	3.78313	0.000154868	0.00113144
AT5G50000	837.471	-0.514895	0.133312	3.86234	0.000112306	0.000857965
AT3G54880	145.089	-0.514786	0.184001	2.79773	0.00514632	0.0215439
AT1G14280	1116.53	-0.514595	0.0872027	5.90114	3.61006e-09	8.98886e-08
AT3G03150	1224.27	-0.514516	0.183222	2.80815	0.00498268	0.0209331
AT3G53310	132.725	-0.514203	0.135609	3.79181	0.00014955	0.00109698
AT4G38800	1444.72	-0.513644	0.0817455	6.28345	3.31133e-10	1.03284e-08
AT2G45330	248.521	-0.512759	0.146037	3.51116	0.000446149	0.0027998
AT3G57810	435.465	-0.511713	0.124449	4.11183	3.9254e-05	0.000346129
AT1G13080	1404.95	-0.511642	0.120709	4.23864	2.24876e-05	0.000214498
AT4G15540	1276.41	-0.511559	0.174086	2.93854	0.00329765	0.0149459
AT3G13510	283.657	-0.511436	0.139056	3.67791	0.000235157	0.00161844
AT1G30270	394.281	-0.511014	0.141103	3.62157	0.000292816	0.00195558
AT2G15900	380.888	-0.510895	0.100396	5.08882	3.60298e-07	5.67123e-06
AT5G20450	120.456	-0.510877	0.15346	3.32907	0.000871373	0.00491501
AT3G53280	446.949	-0.510808	0.101395	5.0378	4.70909e-07	7.14877e-06
AT5G48230	519.061	-0.510754	0.127736	3.99851	6.3743e-05	0.000525795
AT5G47830	105.989	-0.51054	0.179807	2.83938	0.00452013	0.0193133
AT5G24310	81.1916	-0.510522	0.175165	2.91452	0.00356232	0.0158655
AT5G19860	1073.19	-0.509713	0.137196	3.71523	0.000203019	0.00143082
AT2G45290	293.532	-0.507793	0.133133	3.81418	0.000136636	0.00101336
AT3G49500	560.138	-0.507438	0.126402	4.01449	5.95747e-05	0.000496308
AT3G28050	1069.9	-0.507371	0.0935207	5.42523	5.78814e-08	1.10631e-06
AT4G17190	235.433	-0.507143	0.173294	2.92649	0.00342812	0.0153817
AT2G43680	1607.45	-0.506871	0.104986	4.828	1.37913e-06	1.84518e-05
AT4G26670	172.349	-0.506456	0.170135	2.97678	0.00291289	0.0134915
AT3G49840	97.6286	-0.50583	0.165899	3.04903	0.0022958	0.011049
AT3G01450	93.9906	-0.505697	0.184168	2.74584	0.0060356	0.024515
AT2G25930	118.053	-0.505666	0.190608	2.65291	0.00798019	0.0308049
AT2G43970	8644.03	-0.504815	0.148276	3.40457	0.000662686	0.00392546
AT1G14700	641.047	-0.504378	0.123141	4.09593	4.20485e-05	0.00036706
AT1G59870	4769.38	-0.503904	0.206193	2.44385	0.0145314	0.0497407
AT5G26160	195.824	-0.503548	0.144046	3.49574	0.000472754	0.00293283
AT5G39030	279.805	-0.503354	0.175407	2.86963	0.0041095	0.0178398
AT3G17365	92.5178	-0.502851	0.167649	2.99942	0.00270496	0.0126895
AT5G61460	132.702	-0.502313	0.165182	3.04097	0.00235815	0.0113165
AT5G04070	113.206	-0.502283	0.171594	2.92716	0.00342078	0.0153549
AT2G22830	215.604	-0.501256	0.156909	3.19456	0.00140045	0.00732872
AT2G41760	134.914	-0.500769	0.146425	3.41997	0.000626277	0.00373625
AT4G03415	888.157	-0.500466	0.0839909	5.95858	2.54442e-09	6.56079e-08
AT3G10850	1309.7	-0.500367	0.0813918	6.14764	7.86459e-10	2.27755e-08
AT2G36120	3763.89	-0.500349	0.183844	2.7216	0.00649661	0.0259981
AT5G15350	531.187	-0.499698	0.189341	2.63915	0.00831146	0.0318342
AT4G04960	125.385	-0.499389	0.16081	3.10546	0.00189984	0.00945869
AT2G27970	84.4617	-0.499084	0.201216	2.48034	0.0131256	0.0458436
AT5G22700	488.913	-0.499016	0.0893948	5.58216	2.37551e-08	4.99728e-07
AT3G03040	295.708	-0.498827	0.131711	3.78727	0.000152309	0.00111495
AT2G32520	604.722	-0.498455	0.137721	3.6193	0.000295402	0.00196958
AT2G24940	1570.5	-0.497814	0.123378	4.03487	5.46317e-05	0.000461644
AT4G02610	145.767	-0.497789	0.157892	3.15273	0.00161751	0.00827897
AT3G13030	273.756	-0.497549	0.117056	4.25051	2.13289e-05	0.000205103
AT3G62330	325.526	-0.497475	0.0998442	4.98251	6.27647e-07	9.23479e-06
AT5G12170	386.954	-0.497408	0.122449	4.06218	4.86173e-05	0.000416788
AT4G18570	738.243	-0.497208	0.104029	4.77951	1.7572e-06	2.27517e-05
AT1G69360	312.62	-0.497117	0.175291	2.83595	0.0045689	0.019476
AT1G05320	376.649	-0.497055	0.101419	4.90099	9.53564e-07	1.32804e-05
AT2G20950	622.758	-0.497019	0.112001	4.43763	9.09547e-06	9.64273e-05
AT4G33000	606.566	-0.496907	0.106601	4.66139	3.14075e-06	3.80397e-05
AT3G14100	771.398	-0.496069	0.10955	4.52826	5.94717e-06	6.64924e-05
AT5G02010	143.074	-0.496003	0.178709	2.77547	0.00551215	0.0227339
AT4G25720	97.5456	-0.495024	0.167156	2.96145	0.00306192	0.0140714
AT5G44710	105.394	-0.494987	0.168441	2.93863	0.00329663	0.0149447
AT2G37200	228.206	-0.494924	0.18021	2.74637	0.00602581	0.0244801
AT1G31540	1084.21	-0.494906	0.13611	3.63609	0.000276811	0.00186483
AT2G21195	157.732	-0.494781	0.173835	2.84626	0.00442359	0.0189816
AT3G28956	52.2073	-0.494177	0.193776	2.55025	0.0107645	0.0392431
AT3G45310	391.84	-0.494007	0.11179	4.41906	9.91294e-06	0.000104213
AT1G63750	130.497	-0.493154	0.152608	3.2315	0.00123141	0.00660252
AT5G60280	89.2368	-0.493055	0.196777	2.50566	0.0122224	0.0432919
AT3G32930	1173.63	-0.492968	0.107484	4.58643	4.50897e-06	5.23672e-05
AT1G02100	481.55	-0.491694	0.100966	4.86987	1.1167e-06	1.52498e-05
AT1G17510	66.8187	-0.491397	0.185919	2.64308	0.00821565	0.0315439
AT4G13720	322.95	-0.491313	0.13856	3.54585	0.00039135	0.00250446
AT5G21020	2109.28	-0.490724	0.183348	2.67646	0.00744049	0.0291078
AT3G21690	1105.9	-0.490241	0.1328	3.69156	0.000222884	0.0015467
AT4G35020	231.488	-0.489871	0.131856	3.71519	0.000203048	0.00143082
AT5G59690	961.039	-0.489781	0.104313	4.69531	2.66207e-06	3.2736e-05
AT5G06290	7651.87	-0.48914	0.116914	4.18375	2.86739e-05	0.000263488
AT5G15170	255.853	-0.488862	0.14929	3.27458	0.0010582	0.00577878
AT4G13560	389.608	-0.488421	0.151348	3.22714	0.00125032	0.00668249
AT3G16660	484.821	-0.488202	0.199641	2.4454	0.0144691	0.0495784
AT2G25010	332.605	-0.488164	0.0994965	4.90634	9.27893e-07	1.29769e-05
AT5G03610	133.749	-0.488061	0.16702	2.92217	0.00347604	0.0155504
[truncated: 3,871 more rows]

## Sheet: 2-The DEGs under NH4+ treatment
Supplementary Data 1 The differentially expressed genes (DEGs) in A. thaliana leaf under NH4+ treatment.
The genes having adjusted P-value <0.05 were extracted. In our experiments, the Log2 (NH4+/GM) on gene expression was calculated.NH4+(General Mediume+30mM NH4+), GM(General Mediume)
Gene	baseMean	log2FoldChange	lfcSE	stat	pvalue	padj
AT3G36659	3.67656	5.37672	1.27997	4.20066	2.66141e-05	0.000374768
AT2G28270	4.74936	5.00734	1.1931	4.19693	2.70563e-05	0.000379152
AT4G16740	3.40528	4.51439	1.38028	3.27064	0.00107305	0.0086862
AT1G08430	35.4143	4.23314	0.467753	9.04995	1.43033e-19	1.80638e-17
AT5G13170	109.131	4.17603	0.34163	12.2238	2.31868e-34	8.78485e-32
AT4G36850	2762.3	3.93212	0.0990539	39.6968	0	0
AT2G26695	327.472	3.83011	0.172591	22.1919	4.11538e-109	2.14391e-105
AT4G28040	76.4527	3.81183	0.323367	11.7879	4.50393e-32	1.53857e-29
AT2G41260	7.4412	3.79893	1.11998	3.39195	0.000693978	0.00611851
AT5G12020	5.19078	3.73665	0.997801	3.74489	0.000180475	0.00197689
AT1G73120	144.667	3.60309	0.241248	14.9352	1.94392e-50	1.92892e-47
AT4G09415	4.70031	3.60128	1.05039	3.42853	0.000606859	0.00547671
AT1G48400	2.92363	3.51289	1.28881	2.72568	0.00641693	0.0368059
AT3G27250	42.3957	3.48645	0.389433	8.95263	3.47113e-19	4.27996e-17
AT3G10185	2.89706	3.46939	1.26984	2.73215	0.00629227	0.036341
AT3G46270	7.9815	3.40061	0.934286	3.63979	0.000272855	0.00280917
AT1G53540	6.92739	3.39328	0.813657	4.17041	3.04055e-05	0.000421831
AT2G37770	42.5376	3.38385	0.401835	8.42101	3.73253e-17	3.86957e-15
AT5G59310	31.9556	3.36933	0.539482	6.24549	4.22465e-10	1.71605e-08
AT1G51840	20.6792	3.33373	0.581246	5.73548	9.72347e-09	3.08868e-07
AT5G17860	105.96	3.2909	0.224282	14.6731	9.59156e-49	9.08495e-46
AT1G15040	6.63843	3.07804	0.904785	3.40196	0.000669043	0.00593508
AT1G18710	71.9467	3.05677	0.293313	10.4215	1.97774e-25	4.20533e-23
AT2G30766	10.0075	3.0361	0.71171	4.26592	1.99083e-05	0.000290918
AT2G39030	16.6381	2.92899	0.782276	3.74419	0.000180979	0.00197966
AT3G13950	6.01638	2.89157	0.994147	2.9086	0.00363054	0.0233569
AT2G37870	20.8994	2.87493	0.615126	4.67373	2.95784e-06	5.36426e-05
AT2G03770	3.98383	2.86235	1.03429	2.76746	0.00564955	0.033237
AT1G73325	16.8342	2.78383	0.519426	5.35943	8.34833e-08	2.17182e-06
AT5G46830	28.7606	2.73911	0.45118	6.07099	1.27127e-09	4.82525e-08
AT5G05965	4.37601	2.70094	0.956506	2.82375	0.00474652	0.0289883
AT5G38200	185.843	2.68946	0.565094	4.75931	1.94253e-06	3.74454e-05
AT4G01870	555.073	2.6072	0.168632	15.4609	6.36708e-54	8.84515e-51
AT4G33020	26.0106	2.60162	0.571985	4.54841	5.40529e-06	9.14249e-05
AT3G22100	5.04436	2.5473	0.877319	2.9035	0.00369017	0.0236675
AT5G66650	61.7724	2.51404	0.264951	9.48868	2.33984e-21	3.69376e-19
AT5G50760	37.6236	2.47616	0.318694	7.76972	7.86588e-15	6.04831e-13
AT5G02020	195.447	2.45014	0.230358	10.6363	2.02081e-26	4.67885e-24
AT3G21660	6.75112	2.40538	0.743554	3.23498	0.00121651	0.00963135
AT2G16005	65.2296	2.40458	0.330456	7.27655	3.42477e-13	2.09898e-11
AT4G09405	12.0314	2.40305	0.563967	4.26097	2.03539e-05	0.000296391
AT2G39800	4486.9	2.31143	0.123021	18.789	9.29958e-79	3.22974e-75
AT5G38910	10.3844	2.26602	0.765926	2.95853	0.00309108	0.0205265
AT2G42540	676.392	2.25728	0.178385	12.654	1.06286e-36	4.92176e-34
AT4G34710	5995.83	2.2537	0.0664256	33.9282	2.55993e-252	2.66719e-248
AT1G09500	85.0791	2.19373	0.208471	10.5229	6.77195e-26	1.51735e-23
AT4G23700	50.2931	2.18458	0.384781	5.67745	1.36719e-08	4.18349e-07
AT5G24155	133.613	2.17823	0.247984	8.78378	1.58077e-18	1.86102e-16
AT2G22200	75.7073	2.16829	0.228665	9.48237	2.48566e-21	3.89445e-19
AT3G48510	8.45227	2.16767	0.750195	2.88948	0.00385883	0.0244706
AT4G15210	106.604	2.15218	0.358169	6.00884	1.86852e-09	6.80703e-08
AT2G18050	81.687	2.13052	0.346913	6.14137	8.18132e-10	3.22273e-08
AT5G12030	8.97521	2.11687	0.644303	3.28552	0.00101795	0.00833149
AT2G36750	19.229	2.10604	0.483322	4.35743	1.316e-05	0.0002009
AT2G29500	46.5153	2.07992	0.318893	6.52233	6.92227e-11	3.14262e-09
AT5G54190	122.681	2.06741	0.264983	7.80205	6.09094e-15	4.73593e-13
AT5G40800	13.4998	2.05726	0.572401	3.59408	0.000325535	0.00326916
AT3G49620	32.1286	2.05098	0.33919	6.0467	1.4784e-09	5.53084e-08
AT3G30730	9.21924	2.04294	0.699398	2.92099	0.0034892	0.0226175
AT2G31083	6.05878	2.02782	0.754336	2.68822	0.0071834	0.0403797
AT5G22890	27.1613	2.02591	0.53257	3.80403	0.000142361	0.00160092
AT1G07430	21.2641	2.01509	0.440368	4.57592	4.74142e-06	8.15196e-05
AT2G41380	108.5	2.0077	0.309926	6.47799	9.2954e-11	4.12122e-09
AT5G53990	13.5579	1.9974	0.489841	4.07765	4.54941e-05	0.000598562
AT1G05680	87.6772	1.9909	0.598464	3.32668	0.000878867	0.00739073
AT1G72260	10.6323	1.98747	0.612449	3.24512	0.00117401	0.00935841
AT3G28220	1538.35	1.97269	0.154711	12.7508	3.08454e-37	1.46081e-34
AT5G28510	10.6089	1.95675	0.57678	3.39254	0.000692488	0.00611185
AT3G28740	243.738	1.93767	0.431578	4.48973	7.13145e-06	0.0001166
AT5G59220	90.8412	1.91632	0.2593	7.39035	1.46441e-13	9.44747e-12
AT1G69260	78.1638	1.87718	0.253833	7.39534	1.41048e-13	9.12784e-12
AT5G51030	10.7732	1.87605	0.599898	3.12727	0.00176435	0.0130097
AT3G48360	1142.82	1.87522	0.558261	3.35904	0.000782149	0.00674046
AT4G32480	283.386	1.83936	0.364133	5.05136	4.38682e-07	9.85049e-06
AT1G67810	31.2761	1.8377	0.433158	4.24256	2.20982e-05	0.000318453
AT1G52000	1213.19	1.83338	0.159326	11.5071	1.21531e-30	3.77979e-28
AT2G33380	191.535	1.83201	0.268023	6.83527	8.18496e-12	4.18035e-10
AT1G77760	5124.06	1.8166	0.278952	6.51221	7.40521e-11	3.34729e-09
AT5G16980	118.434	1.81321	0.178734	10.1448	3.49644e-24	7.00566e-22
AT1G52690	20.0785	1.80743	0.514365	3.51391	0.000441561	0.0042034
AT2G02120	55.1916	1.80545	0.485604	3.71795	0.000200845	0.00215843
AT4G13420	25.5259	1.80419	0.577799	3.12252	0.0017931	0.0131797
AT5G59370	6.5027	1.80376	0.653806	2.75887	0.00580021	0.0339794
AT3G22560	10.6322	1.79447	0.608727	2.9479	0.00319939	0.0210844
AT3G52720	761.112	1.76705	0.129629	13.6316	2.59951e-42	1.86788e-39
AT1G73480	959.735	1.76404	0.182688	9.65603	4.63489e-22	7.72655e-20
AT4G25480	16.6651	1.76211	0.543595	3.24159	0.00118866	0.00944673
AT5G59320	69.5644	1.75522	0.313844	5.59265	2.23633e-08	6.54502e-07
AT3G19030	573.199	1.73047	0.202425	8.54871	1.24471e-17	1.3439e-15
AT1G56600	107.267	1.71861	0.273672	6.27982	3.38958e-10	1.40422e-08
AT4G00910	13.251	1.71846	0.487147	3.5276	0.000419345	0.00403803
AT1G62540	312.813	1.70533	0.170997	9.97285	2.00389e-23	3.83092e-21
AT3G50770	25.9284	1.69284	0.402862	4.20203	2.64536e-05	0.000372964
AT3G27884	21.6944	1.69039	0.48228	3.50499	0.00045662	0.00432502
AT3G20340	23.6793	1.67665	0.431988	3.88124	0.000103925	0.00122696
AT4G33550	56.0029	1.67183	0.361767	4.6213	3.81337e-06	6.73986e-05
AT1G02850	134.696	1.66559	0.263373	6.32407	2.54758e-10	1.07029e-08
AT2G04040	24.1816	1.66533	0.518214	3.2136	0.00131082	0.0102495
AT5G63160	995.975	1.65792	0.443811	3.73565	0.000187232	0.00203629
AT4G23600	593.106	1.65464	0.28219	5.86357	4.53022e-09	1.53998e-07
AT3G07350	245.579	1.64159	0.195116	8.41341	3.98247e-17	4.10826e-15
AT5G24770	4962.64	1.63744	0.317618	5.15536	2.53144e-07	5.96006e-06
AT4G10310	41.608	1.61322	0.315997	5.10518	3.30486e-07	7.5928e-06
AT1G10585	20.7707	1.60794	0.489258	3.28648	0.00101446	0.00830624
AT4G35720	23.3225	1.60024	0.465628	3.43674	0.000588754	0.00533875
AT1G52400	5969.1	1.5902	0.121538	13.084	4.06472e-39	2.49119e-36
AT1G52040	415.446	1.5835	0.333545	4.74748	2.05965e-06	3.92312e-05
AT1G48100	69.0977	1.58242	0.264125	5.99119	2.0831e-09	7.49699e-08
AT1G79170	16.7879	1.58013	0.463721	3.40749	0.000655628	0.00583347
AT5G59340	22.7092	1.57687	0.400433	3.93792	8.21916e-05	0.00100041
AT3G28270	266.054	1.57307	0.203834	7.71742	1.18708e-14	8.93009e-13
AT1G74458	12.7987	1.56867	0.478295	3.27971	0.00103912	0.0084616
AT3G48290	44.9479	1.56302	0.247889	6.30532	2.87598e-10	1.20341e-08
AT1G66760	591.105	1.55888	0.0864629	18.0294	1.14442e-72	3.40676e-69
AT3G04530	13.1635	1.5559	0.491207	3.1675	0.00153756	0.0116933
AT4G29610	24.9511	1.54186	0.33394	4.61717	3.89018e-06	6.83607e-05
AT1G73260	280.187	1.53479	0.237689	6.45711	1.06721e-10	4.69166e-09
AT5G24780	738.227	1.53116	0.420563	3.64073	0.000271868	0.00280177
AT1G10640	445.797	1.52952	0.133057	11.4953	1.39343e-30	4.20816e-28
AT1G07050	11.4544	1.52313	0.483297	3.15153	0.00162417	0.0122217
AT1G60190	24.0969	1.51697	0.527732	2.87451	0.00404653	0.0255134
AT1G13230	8.24605	1.51057	0.568539	2.65693	0.00788565	0.0435634
AT1G60590	441.043	1.49677	0.153861	9.72808	2.28869e-22	4.04167e-20
AT3G22240	79.59	1.49541	0.330397	4.52612	6.00776e-06	0.000100393
AT2G46750	64.2249	1.49374	0.309878	4.8204	1.43268e-06	2.82711e-05
AT2G39330	503.689	1.4866	0.364092	4.08304	4.44497e-05	0.000586601
AT1G65870	50.1764	1.4822	0.390789	3.79285	0.000148929	0.00166491
AT3G17790	113.442	1.47537	0.251426	5.868	4.41094e-09	1.50434e-07
AT1G64110	30.1304	1.47034	0.438809	3.35075	0.000805936	0.0068913
AT2G41190	111.41	1.45632	0.170228	8.55508	1.17789e-17	1.27838e-15
AT1G47510	11.1056	1.45127	0.52109	2.78507	0.00535154	0.031726
AT1G65890	30.1583	1.44213	0.355355	4.05828	4.94361e-05	0.000644246
AT2G38170	2496.64	1.439	0.110129	13.0665	5.11626e-39	2.96146e-36
AT5G12940	153.246	1.43205	0.236826	6.04687	1.4769e-09	5.53084e-08
AT2G38210	131.755	1.42937	0.244981	5.8346	5.39202e-09	1.8181e-07
AT1G70880	32.5459	1.42885	0.301614	4.73734	2.16545e-06	4.10962e-05
AT1G52890	10.7386	1.42203	0.535415	2.65594	0.00790874	0.0436447
AT5G36910	690.518	1.41955	0.130094	10.9117	1.01335e-27	2.54412e-25
AT4G23680	480.103	1.41142	0.171485	8.23056	1.86334e-16	1.78111e-14
AT4G01080	63.4017	1.40652	0.323547	4.34718	1.379e-05	0.000209291
AT3G51860	67.8337	1.4021	0.309058	4.53669	5.71451e-06	9.60314e-05
AT5G01600	6809.27	1.3963	0.320912	4.35105	1.35485e-05	0.000206226
AT4G23670	17852.2	1.37548	0.102672	13.3969	6.30575e-41	4.10622e-38
AT5G61820	763.5	1.37005	0.162146	8.44946	2.9265e-17	3.09555e-15
AT4G15440	76.9191	1.36208	0.247346	5.50677	3.65485e-08	1.02503e-06
AT5G07440	2075.86	1.35691	0.142578	9.51698	1.78286e-21	2.87995e-19
AT3G62270	220.602	1.35576	0.223652	6.06192	1.3451e-09	5.07811e-08
AT3G48280	149.033	1.35299	0.165335	8.18332	2.7612e-16	2.55724e-14
AT2G43570	57.6689	1.35165	0.401453	3.3669	0.000760177	0.00660048
AT5G12270	15.3675	1.34683	0.505666	2.66348	0.00773379	0.0429065
AT2G32530	224.457	1.34414	0.171766	7.82543	5.05925e-15	4.02384e-13
AT3G60140	88.0101	1.34119	0.339218	3.95377	7.69302e-05	0.000945077
AT4G10500	14.1156	1.34118	0.514374	2.60739	0.00912345	0.0488099
AT3G51490	21.2969	1.33705	0.374796	3.56741	0.000360531	0.00355549
AT1G54010	1632.8	1.3344	0.140769	9.47935	2.55867e-21	3.97893e-19
AT2G05380	2420.07	1.33084	0.162319	8.19892	2.42563e-16	2.28711e-14
AT3G29575	219.708	1.33054	0.165553	8.03695	9.21024e-16	7.99679e-14
AT2G20670	2035.96	1.31171	0.298714	4.3912	1.12727e-05	0.000175168
AT5G19600	267.949	1.29941	0.215804	6.02126	1.73061e-09	6.37146e-08
AT5G52310	662.512	1.29053	0.165137	7.81487	5.50195e-15	4.34279e-13
AT3G44300	273.236	1.29011	0.386847	3.33495	0.000853162	0.00724458
AT5G13370	268.564	1.28992	0.117668	10.9624	5.79488e-28	1.52853e-25
AT1G52100	426.69	1.28855	0.170098	7.57535	3.58172e-14	2.53003e-12
AT4G20320	337.168	1.28581	0.175433	7.32936	2.31262e-13	1.46475e-11
AT4G08570	20.8969	1.27965	0.385349	3.32076	0.000897743	0.00751292
AT2G29460	23.1313	1.27768	0.395414	3.23125	0.00123251	0.00973579
AT1G60960	952.967	1.27637	0.143002	8.92553	4.43583e-19	5.43729e-17
AT5G65870	89.196	1.27533	0.182676	6.98137	2.9232e-12	1.59043e-10
AT1G09420	82.8466	1.26797	0.208321	6.08664	1.15301e-09	4.41664e-08
AT1G76610	25.1323	1.26743	0.359781	3.52276	0.00042707	0.0040928
AT2G46600	227.257	1.26574	0.199739	6.33697	2.34328e-10	9.90453e-09
AT5G17780	26.3322	1.25986	0.360384	3.49587	0.000472512	0.00444324
AT1G07400	22.4176	1.25908	0.369223	3.4101	0.000649399	0.00578545
AT2G27420	117.719	1.25721	0.272834	4.60798	4.06602e-06	7.10207e-05
AT3G59340	16.0739	1.255	0.426163	2.94489	0.00323068	0.0212503
AT4G02280	98.5063	1.25314	0.20916	5.9913	2.08169e-09	7.49699e-08
AT3G10150	18.1497	1.2475	0.374593	3.33028	0.000867583	0.00733119
AT3G14440	86.7577	1.23974	0.29545	4.1961	2.71556e-05	0.000380033
AT1G09180	34.7331	1.235	0.363309	3.39931	0.00067557	0.0059788
AT4G14690	53.2613	1.23301	0.287675	4.28612	1.81819e-05	0.000267945
AT2G47260	125.08	1.23268	0.146231	8.4297	3.46538e-17	3.61058e-15
AT5G19970	66.3951	1.20441	0.244289	4.93028	8.21131e-07	1.69749e-05
AT1G65860	609.737	1.20053	0.120604	9.95433	2.41449e-23	4.57393e-21
AT4G13800	94.7466	1.1939	0.210101	5.6825	1.32739e-08	4.07251e-07
AT3G48240	18.1653	1.19182	0.389831	3.05726	0.00223367	0.0157354
AT3G05640	229.352	1.18875	0.12543	9.47738	2.60751e-21	4.02484e-19
AT1G52030	515.889	1.18743	0.182516	6.50592	7.72177e-11	3.4753e-09
AT3G12500	82.6451	1.18166	0.26692	4.42704	9.55353e-06	0.000151044
AT3G63380	44.6884	1.17894	0.292375	4.03228	5.52392e-05	0.000710539
AT5G01740	110.275	1.17661	0.253799	4.63598	3.55248e-06	6.32705e-05
AT5G12930	61.4052	1.17593	0.23464	5.01162	5.39726e-07	1.18139e-05
AT5G26200	113.095	1.17535	0.159977	7.34702	2.02674e-13	1.2955e-11
AT4G24010	48.2244	1.16846	0.295575	3.95317	7.71218e-05	0.000945888
AT4G28390	92.137	1.16586	0.210446	5.53993	3.02588e-08	8.63742e-07
AT1G65690	37.3666	1.16373	0.298776	3.89499	9.82015e-05	0.00116866
AT1G06080	257.515	1.16213	0.136772	8.49679	1.94903e-17	2.08276e-15
AT2G40435	105.923	1.16145	0.171626	6.7673	1.31207e-11	6.55659e-10
AT3G45140	4968.29	1.16011	0.230396	5.03531	4.77076e-07	1.05871e-05
AT4G02000	14.8832	1.16007	0.440226	2.63517	0.0084096	0.0457186
AT4G23990	199.52	1.15811	0.158665	7.29912	2.89647e-13	1.79633e-11
AT5G24420	580.243	1.15051	0.0995797	11.5536	7.07742e-31	2.23454e-28
AT2G18480	37.0942	1.14798	0.298721	3.843	0.000121539	0.00139847
AT1G62710	152.861	1.13936	0.171152	6.65697	2.79527e-11	1.33903e-09
AT3G51895	707.077	1.13553	0.151951	7.473	7.8385e-14	5.32048e-12
AT1G57590	68.7723	1.12253	0.259611	4.32392	1.53282e-05	0.00023062
AT1G49500	1256.77	1.11709	0.127677	8.74932	2.14648e-18	2.4849e-16
AT3G50970	325.934	1.11334	0.398954	2.79063	0.00526048	0.0312836
AT3G20370	824.094	1.10798	0.259272	4.27344	1.92483e-05	0.000281867
AT5G52050	54.0073	1.1071	0.271272	4.08116	4.48114e-05	0.000590626
AT5G65010	4030.62	1.10579	0.116522	9.48993	2.31189e-21	3.67749e-19
AT5G15970	1780.04	1.0995	0.282661	3.88983	0.000100313	0.00118972
AT5G24150	916.281	1.09885	0.270749	4.05855	4.9378e-05	0.000643891
AT2G15128	51.2799	1.09429	0.23409	4.67464	2.9447e-06	5.35442e-05
AT4G06536	40.1874	1.08951	0.314601	3.46315	0.000533889	0.00492047
AT3G09415	49.764	1.08855	0.235764	4.61713	3.89077e-06	6.83607e-05
AT1G18265	56.9943	1.08682	0.253068	4.29457	1.75034e-05	0.000259604
AT1G68238	266.983	1.08393	0.176687	6.13471	8.53154e-10	3.32922e-08
AT1G53170	156.54	1.07977	0.187165	5.76907	7.97112e-09	2.59941e-07
AT2G28500	25.8095	1.07455	0.386716	2.77866	0.00545838	0.032258
AT3G55710	157.263	1.06995	0.18951	5.64585	1.64367e-08	4.93528e-07
AT1G09600	30.784	1.06957	0.300984	3.55359	0.000380015	0.00372122
AT1G51140	322.951	1.06641	0.143223	7.44583	9.6337e-14	6.41364e-12
AT1G64660	283.616	1.0648	0.138302	7.69906	1.37067e-14	1.01644e-12
AT1G16410	4435.34	1.06462	0.112384	9.47306	2.71751e-21	4.15447e-19
AT2G17036	45.1502	1.06398	0.259467	4.10063	4.12025e-05	0.000550371
AT3G23510	83.2983	1.05951	0.248517	4.26332	2.01413e-05	0.000293499
AT1G62560	986.252	1.05771	0.124146	8.5199	1.59687e-17	1.71524e-15
AT2G16990	117.063	1.0552	0.161069	6.55126	5.70546e-11	2.61298e-09
AT5G56080	86.7173	1.05196	0.322134	3.26559	0.00109236	0.00881531
AT3G48310	389.271	1.05052	0.186338	5.63773	1.72302e-08	5.15127e-07
AT2G14878	318.974	1.04649	0.125291	8.35251	6.68248e-17	6.72703e-15
AT5G66400	256.45	1.0416	0.137469	7.57699	3.53674e-14	2.50676e-12
AT3G20475	40.0382	1.03913	0.250866	4.14217	3.44038e-05	0.000471029
AT4G34000	1105.11	1.03315	0.0852645	12.117	8.58724e-34	3.19537e-31
AT4G30960	6480.66	1.03163	0.0823051	12.5342	4.84993e-36	2.10289e-33
AT4G06534	85.211	1.02492	0.212432	4.82472	1.40203e-06	2.77979e-05
AT1G69480	34.9212	1.0237	0.301226	3.39844	0.000677722	0.00598914
AT1G10970	258.648	1.0216	0.154291	6.62124	3.56193e-11	1.67548e-09
AT2G05440	5276	1.02144	0.352058	2.90134	0.00371576	0.023744
AT5G23820	2143.06	1.02061	0.0790637	12.9087	4.01973e-38	2.20429e-35
AT3G44860	67.7906	1.01497	0.361071	2.811	0.00493877	0.0298561
AT2G32550	113.603	1.01376	0.161456	6.27885	3.41089e-10	1.41024e-08
AT1G11210	34.907	1.01325	0.284106	3.56644	0.000361861	0.00356692
AT5G39860	202.3	1.01301	0.169623	5.97215	2.34153e-09	8.35495e-08
AT2G43445	75.2287	0.99991	0.185056	5.40328	6.54334e-08	1.74584e-06
AT3G27025	19.2333	0.998463	0.38299	2.60702	0.00913337	0.0488379
AT1G70830	4496.71	0.996786	0.112955	8.82465	1.09798e-18	1.33022e-16
AT4G11650	531.068	0.996496	0.34995	2.84754	0.00440588	0.0273732
AT1G15310	72.3254	0.996391	0.253834	3.92536	8.6601e-05	0.00104614
AT1G28230	151.244	0.994869	0.165181	6.02292	1.71296e-09	6.32883e-08
AT5G04370	27.0884	0.988014	0.313876	3.14779	0.0016451	0.0123201
AT1G15150	25.2731	0.985739	0.312969	3.14964	0.00163474	0.0122844
AT1G05000	49.4958	0.982929	0.29256	3.35976	0.000780115	0.00673346
AT3G03170	31.5415	0.981319	0.309908	3.16648	0.00154296	0.0117216
AT1G20380	236.45	0.979948	0.128474	7.62759	2.39175e-14	1.73631e-12
AT3G05400	81.2102	0.978254	0.201428	4.85659	1.19428e-06	2.41146e-05
AT5G38710	60.0038	0.973129	0.235456	4.13295	3.58136e-05	0.000487767
AT2G35820	363.568	0.969971	0.137659	7.0462	1.83873e-12	1.02722e-10
AT3G49780	220.169	0.967599	0.132234	7.31732	2.52978e-13	1.58418e-11
AT4G15490	288.949	0.967565	0.121666	7.95265	1.82566e-15	1.52783e-13
AT4G22755	264.483	0.967512	0.106578	9.07797	1.10619e-19	1.42289e-17
AT3G12750	158.683	0.965828	0.1588	6.08205	1.18654e-09	4.52843e-08
AT1G70890	2099.79	0.965759	0.110707	8.72357	2.69559e-18	3.0863e-16
AT2G46680	344.618	0.964865	0.143317	6.73237	1.66922e-11	8.20358e-10
AT3G01425	20.7334	0.962223	0.352637	2.72865	0.0063595	0.0365873
AT4G13290	117.111	0.962011	0.219355	4.38563	1.15653e-05	0.000178649
AT2G26980	1602.48	0.956063	0.0820006	11.6592	2.05933e-31	6.70506e-29
AT3G08040	78.1522	0.953651	0.328877	2.89972	0.00373499	0.0238449
AT3G48320	72.2446	0.950526	0.209659	4.53368	5.79662e-06	9.72544e-05
AT1G14185	23.7614	0.949329	0.336873	2.81806	0.00483146	0.029395
AT5G16790	46.3848	0.943926	0.266686	3.53947	0.000400932	0.0038913
AT3G50440	504.713	0.943888	0.130231	7.24778	4.23661e-13	2.55891e-11
AT3G21460	114.528	0.938276	0.191071	4.91061	9.07945e-07	1.86035e-05
AT2G21320	188.541	0.933622	0.18909	4.93745	7.9151e-07	1.64606e-05
AT4G01600	64.8697	0.933026	0.192736	4.84094	1.29225e-06	2.58923e-05
AT1G22500	106.819	0.931951	0.185516	5.02357	5.0719e-07	1.11603e-05
AT3G49940	586.658	0.930873	0.1716	5.42466	5.80651e-08	1.5653e-06
AT3G21670	1153.86	0.928407	0.140263	6.61905	3.61522e-11	1.6929e-09
AT3G16470	3665.53	0.925317	0.098837	9.36205	7.82027e-21	1.10856e-18
AT1G79520	269.994	0.92146	0.161413	5.70871	1.13838e-08	3.55112e-07
AT4G33960	175.929	0.918088	0.141087	6.50724	7.65455e-11	3.4525e-09
AT4G16680	78.3272	0.917396	0.178723	5.13308	2.85045e-07	6.62183e-06
AT3G48990	3948.9	0.916753	0.0985526	9.30217	1.37603e-20	1.88643e-18
AT2G34810	369.247	0.91617	0.143055	6.40434	1.51025e-10	6.55635e-09
AT1G77520	70.0238	0.916128	0.335289	2.73235	0.00628834	0.0363284
AT1G30260	61.4538	0.915792	0.236262	3.87617	0.000106113	0.00124926
AT1G74090	926.543	0.915418	0.0790786	11.576	5.4505e-31	1.74735e-28
AT5G10890	27.0303	0.91306	0.300145	3.04206	0.00234962	0.0164465
AT1G01250	32.9193	0.912827	0.32844	2.77928	0.00544791	0.0322052
AT3G19270	44.1108	0.912321	0.235421	3.87528	0.000106502	0.00125242
AT5G50400	663.791	0.910743	0.0936694	9.72295	2.40712e-22	4.21509e-20
AT1G17100	744.1	0.909264	0.130558	6.96447	3.2965e-12	1.77504e-10
AT1G15170	124.094	0.908725	0.170292	5.33626	9.48836e-08	2.43496e-06
AT4G36830	34.6849	0.907922	0.296109	3.06617	0.00216819	0.0153885
AT4G30450	111.814	0.907338	0.246693	3.678	0.000235072	0.00247395
AT4G37180	568.977	0.907124	0.124988	7.25766	3.93841e-13	2.39967e-11
AT2G25680	71.1226	0.905162	0.193141	4.68653	2.77878e-06	5.1017e-05
AT5G64700	48.5353	0.903842	0.25702	3.51663	0.000437071	0.00416827
AT4G16146	46.3661	0.902009	0.339096	2.66004	0.00781315	0.0432661
AT1G78370	9920.13	0.901469	0.0852913	10.5693	4.13617e-26	9.36842e-24
AT4G32340	826.051	0.900072	0.134091	6.7124	1.91454e-11	9.34315e-10
AT5G53730	45.8144	0.899828	0.257488	3.49463	0.000474714	0.00445992
AT4G39730	1409.29	0.898825	0.11584	7.75922	8.54523e-15	6.54653e-13
AT1G65490	284.238	0.894082	0.214067	4.17664	2.95845e-05	0.000411536
AT4G22990	548.137	0.893768	0.0953397	9.37457	6.94592e-21	9.982e-19
AT2G01890	250.014	0.892352	0.177971	5.01404	5.32997e-07	1.16911e-05
AT5G51390	28.5969	0.891941	0.318449	2.80089	0.00509625	0.0305775
AT1G05340	34.5892	0.884713	0.323109	2.73813	0.00617897	0.0357958
AT1G77450	98.2727	0.884682	0.183252	4.82767	1.38141e-06	2.74412e-05
AT2G38750	540.103	0.884266	0.122527	7.21691	5.31808e-13	3.17531e-11
AT5G17450	96.2944	0.883202	0.19081	4.6287	3.67961e-06	6.52005e-05
AT4G21650	700.333	0.881283	0.118778	7.41955	1.17522e-13	7.70101e-12
AT4G35770	795.722	0.879799	0.151501	5.80721	6.35215e-09	2.10105e-07
AT2G43700	37.3446	0.877642	0.256431	3.42252	0.000620428	0.00557262
AT3G03480	30.8871	0.874156	0.309282	2.82641	0.00470736	0.0287998
AT4G30650	480.206	0.87374	0.123244	7.0895	1.34601e-12	7.64258e-11
AT4G23020	152.521	0.867547	0.141759	6.11986	9.36601e-10	3.63443e-08
AT1G55110	298.47	0.867439	0.1129	7.68323	1.55121e-14	1.14624e-12
AT1G06100	83.9349	0.865465	0.276044	3.13524	0.00171713	0.0127295
AT1G21400	488.016	0.864724	0.130632	6.61952	3.6036e-11	1.69126e-09
AT2G37570	607.52	0.862699	0.0789356	10.9292	8.36257e-28	2.15135e-25
AT5G03395	31.9464	0.861702	0.299293	2.87912	0.00398786	0.0252197
AT3G61490	179.807	0.860336	0.129077	6.66531	2.64102e-11	1.26806e-09
AT1G18590	544.678	0.854538	0.108181	7.89913	2.80855e-15	2.30412e-13
AT2G42530	295.413	0.849845	0.233694	3.63658	0.000276282	0.00283884
AT1G21410	262.029	0.848117	0.132526	6.39964	1.55744e-10	6.74716e-09
AT3G11580	45.9746	0.847379	0.258083	3.28336	0.00102576	0.00837246
AT5G47500	2032.19	0.847291	0.116424	7.27766	3.39668e-13	2.08791e-11
AT1G33110	740.316	0.846769	0.151239	5.59886	2.1576e-08	6.33242e-07
AT1G20030	177.328	0.846323	0.172624	4.9027	9.45287e-07	1.93117e-05
AT3G57540	77.2183	0.845493	0.208876	4.04783	5.16948e-05	0.000667007
AT3G14210	8592.24	0.845419	0.0520389	16.2459	2.38796e-59	3.55431e-56
AT5G50915	187.361	0.845164	0.148182	5.70354	1.17346e-08	3.64962e-07
AT2G36590	48.9738	0.841703	0.240174	3.50456	0.000457368	0.00433014
AT3G16400	5013.89	0.841476	0.0976396	8.61818	6.80259e-18	7.58034e-16
AT4G09500	131.566	0.840625	0.152529	5.51125	3.56293e-08	1.0033e-06
AT2G45600	170.51	0.838273	0.181209	4.62601	3.72785e-06	6.59991e-05
AT1G18870	155.975	0.838268	0.184586	4.54134	5.58984e-06	9.41642e-05
AT2G25450	7048.53	0.837557	0.077352	10.8279	2.54002e-27	6.15452e-25
AT1G52410	1032.23	0.834305	0.125732	6.63556	3.23283e-11	1.53803e-09
AT3G14450	54.7103	0.830772	0.256852	3.23443	0.00121884	0.00964242
AT2G43550	722.595	0.830178	0.105357	7.87969	3.28203e-15	2.65081e-13
AT2G23000	606.196	0.829434	0.141402	5.8658	4.46967e-09	1.52188e-07
AT1G52565	29.7491	0.827918	0.293488	2.82096	0.00478796	0.0291815
AT5G52320	107.528	0.827124	0.255835	3.23304	0.0012248	0.00967857
AT5G02480	2100.11	0.824902	0.0638537	12.9186	3.53404e-38	1.99033e-35
AT5G67420	1590.09	0.823607	0.121513	6.77792	1.21917e-11	6.13648e-10
AT2G26700	48.5262	0.823139	0.226798	3.62939	0.000284088	0.00290615
AT5G38020	362.531	0.822426	0.222933	3.68912	0.000225029	0.00238512
AT2G35075	57.7788	0.821696	0.236434	3.47537	0.000510151	0.00474153
AT2G38995	166.971	0.821444	0.15281	5.37559	7.63339e-08	1.9983e-06
AT2G31790	939.287	0.820131	0.12531	6.54482	5.95689e-11	2.72214e-09
AT1G62975	78.4747	0.818406	0.235665	3.47275	0.000515164	0.00477535
AT5G04950	639.396	0.817015	0.106012	7.70681	1.28999e-14	9.65975e-13
AT4G35290	145.867	0.81666	0.14237	5.73618	9.68339e-09	3.08065e-07
AT5G16970	1346.42	0.810834	0.0890817	9.10213	8.85751e-20	1.15358e-17
AT1G20490	110.967	0.81031	0.160984	5.03347	4.81669e-07	1.0655e-05
AT4G21910	1096.94	0.807969	0.101108	7.99118	1.33653e-15	1.13214e-13
AT3G24460	152.491	0.807726	0.231369	3.49107	0.000481092	0.0045117
AT1G49160	109.927	0.80627	0.166971	4.82879	1.37364e-06	2.7339e-05
AT2G30860	13087.9	0.805919	0.0640421	12.5842	2.57926e-36	1.16841e-33
AT3G56090	1420.22	0.803405	0.258047	3.1134	0.00184944	0.0135033
AT1G25550	1011.18	0.802976	0.160934	4.98948	6.05433e-07	1.30601e-05
AT2G37760	249.836	0.794664	0.155385	5.11417	3.15123e-07	7.27443e-06
AT4G19700	107.108	0.793636	0.161771	4.90592	9.29907e-07	1.90348e-05
AT1G31690	243.463	0.791294	0.20704	3.82194	0.000132407	0.0015036
AT2G38540	13699.6	0.790871	0.0975388	8.10827	5.13459e-16	4.65194e-14
AT1G62510	94.2008	0.789515	0.174731	4.51847	6.2289e-06	0.00010359
AT4G14840	53.3431	0.789225	0.258341	3.05497	0.00225085	0.0158403
AT4G21940	64.4482	0.78915	0.220126	3.585	0.000337079	0.00336003
AT1G09240	216.054	0.788753	0.145762	5.41126	6.25834e-08	1.67624e-06
AT1G26560	533.854	0.78546	0.129576	6.06178	1.34623e-09	5.07811e-08
AT1G68670	876.916	0.784745	0.178922	4.38595	1.15481e-05	0.000178515
AT2G29490	163.116	0.776582	0.296459	2.61953	0.00880517	0.0474236
AT2G25625	53.6761	0.776337	0.244605	3.17384	0.00150435	0.0114827
AT4G17470	211.367	0.7756	0.229589	3.37821	0.000729591	0.00637987
AT1G54120	45.2299	0.775434	0.259074	2.9931	0.00276155	0.0187444
AT3G17510	2021.38	0.775353	0.15867	4.88657	1.0261e-06	2.09011e-05
AT4G16260	274.81	0.77308	0.251156	3.07808	0.00208338	0.0149085
AT5G02940	2066.31	0.772965	0.0927115	8.33732	7.59948e-17	7.61336e-15
AT1G79360	30.6076	0.771761	0.278472	2.77142	0.00558131	0.0329378
AT1G75040	103.639	0.762193	0.183015	4.16464	3.11838e-05	0.000430052
AT1G72770	692.106	0.759282	0.100406	7.56213	3.96521e-14	2.78205e-12
AT5G53460	9847.14	0.759071	0.0764053	9.9348	2.93762e-23	5.51479e-21
AT3G62550	1105.61	0.757787	0.108929	6.95668	3.48391e-12	1.86626e-10
AT1G19570	4845.17	0.756352	0.108273	6.98559	2.83666e-12	1.54739e-10
AT1G02820	146.154	0.75571	0.276797	2.73019	0.00632971	0.0364764
AT5G07700	68.2031	0.75398	0.245202	3.07494	0.00210547	0.0150304
AT3G22740	530.892	0.751506	0.190364	3.94772	7.88977e-05	0.000964264
AT5G22580	824.562	0.751385	0.140594	5.34436	9.07351e-08	2.34002e-06
AT3G09390	2947.5	0.749437	0.0910815	8.2282	1.90044e-16	1.80828e-14
AT4G22200	652.02	0.747928	0.140969	5.30561	1.12299e-07	2.85724e-06
AT4G34138	213.853	0.745256	0.149104	4.99822	5.78621e-07	1.25336e-05
AT3G02020	2501.05	0.745098	0.0966846	7.70648	1.29334e-14	9.65975e-13
AT2G40610	1978.93	0.744475	0.238654	3.11948	0.00181172	0.0132838
AT2G37240	752.768	0.740148	0.109492	6.75985	1.3813e-11	6.86959e-10
AT2G40460	720.613	0.738044	0.127381	5.79401	6.87269e-09	2.25178e-07
AT3G47430	396.185	0.737439	0.159082	4.6356	3.559e-06	6.33325e-05
AT4G20070	584.959	0.737294	0.0856556	8.60765	7.45729e-18	8.26569e-16
AT4G18290	128.998	0.735761	0.169567	4.33906	1.43095e-05	0.000216387
AT1G14250	1826.19	0.734736	0.2433	3.01987	0.0025288	0.0174718
AT1G62800	270.823	0.734614	0.132446	5.5465	2.91444e-08	8.36518e-07
AT5G48000	217.969	0.730701	0.25829	2.82899	0.00466946	0.0285931
AT1G14120	167.063	0.730058	0.202615	3.60317	0.000314356	0.00316605
AT1G54040	600.072	0.727814	0.13314	5.46654	4.58917e-08	1.26494e-06
AT1G21680	1236.57	0.726935	0.127145	5.71737	1.08188e-08	3.40548e-07
AT2G30140	167.582	0.72629	0.152929	4.7492	2.04219e-06	3.90057e-05
AT3G62740	196.555	0.725514	0.222796	3.25641	0.00112833	0.00905272
AT1G70790	139.779	0.72157	0.213126	3.38565	0.000710107	0.00623565
AT3G62070	121.801	0.720269	0.175801	4.09706	4.18428e-05	0.000557903
AT2G23010	255.056	0.719286	0.19214	3.74355	0.000181441	0.00198159
AT1G11270	46.857	0.717844	0.233435	3.07514	0.00210405	0.0150254
AT1G35260	103.067	0.7168	0.197821	3.62347	0.000290678	0.00295904
AT2G37100	94.5779	0.716467	0.171847	4.16922	3.0564e-05	0.000423184
AT3G14620	245.996	0.715602	0.126232	5.66894	1.43683e-08	4.37089e-07
AT1G79410	121.539	0.713834	0.160972	4.43453	9.22738e-06	0.000147003
AT1G33340	58.6135	0.712246	0.23229	3.06619	0.00216802	0.0153885
AT1G68740	149.923	0.710001	0.1724	4.11833	3.81623e-05	0.000515711
AT4G34650	137.779	0.708775	0.15544	4.5598	5.12025e-06	8.71382e-05
AT5G24290	77.8644	0.707376	0.234498	3.01655	0.00255669	0.017612
AT4G18270	216.081	0.705497	0.129868	5.43241	5.55976e-08	1.5046e-06
AT4G22880	200.882	0.704042	0.266196	2.64483	0.00817322	0.0447487
AT1G53670	1532.73	0.703945	0.101474	6.93722	3.99898e-12	2.10964e-10
AT2G36800	137.282	0.703589	0.209979	3.35075	0.000805923	0.0068913
AT1G73870	770.828	0.703559	0.124786	5.63811	1.71922e-08	5.1473e-07
AT4G23500	401.358	0.703035	0.120589	5.83001	5.54253e-09	1.86282e-07
AT3G60900	92.3348	0.702207	0.167723	4.18672	2.83015e-05	0.000394744
AT5G10930	188.941	0.701772	0.207076	3.38895	0.000701605	0.00617923
AT2G37640	1287.43	0.701537	0.11004	6.37528	1.82623e-10	7.81417e-09
AT4G12000	79.688	0.698674	0.209927	3.32817	0.000874174	0.00736001
AT5G36790	115.541	0.698415	0.170069	4.10665	4.01436e-05	0.000538643
AT5G14780	1860.46	0.698268	0.0937772	7.44602	9.61951e-14	6.41364e-12
AT1G14580	621.909	0.697236	0.120714	5.77595	7.65181e-09	2.49919e-07
AT3G63210	261.948	0.696875	0.158096	4.40792	1.04369e-05	0.000163398
AT1G49940	46.6887	0.696612	0.245699	2.83523	0.0045793	0.0281984
AT2G46650	893.995	0.696345	0.124452	5.5953	2.20243e-08	6.45489e-07
AT3G26460	254.705	0.69588	0.243156	2.86187	0.00421149	0.0264096
AT2G35960	677.702	0.695321	0.133046	5.22618	1.7305e-07	4.18332e-06
AT2G46530	344.883	0.695103	0.104053	6.68026	2.38524e-11	1.15055e-09
AT3G16420	8421.58	0.693735	0.140344	4.94311	7.68849e-07	1.60856e-05
AT4G39330	3119.06	0.69351	0.115808	5.98846	2.11839e-09	7.59775e-08
AT3G02040	74.5059	0.693429	0.203929	3.40034	0.000673026	0.00596296
AT2G22080	779.69	0.691864	0.0746349	9.26999	1.8617e-20	2.53557e-18
AT1G80110	39.3854	0.691451	0.249043	2.77643	0.00549595	0.0324616
AT4G15450	254.625	0.690693	0.153628	4.49587	6.92855e-06	0.000113862
AT2G22930	38.915	0.690083	0.254354	2.71308	0.00666616	0.0380261
AT2G27830	234.428	0.690082	0.112534	6.13223	8.66581e-10	3.369e-08
AT3G51660	166.152	0.689274	0.201765	3.41623	0.000634948	0.00568099
AT4G29700	476.466	0.684854	0.169452	4.04159	5.30907e-05	0.000684594
AT5G01790	150.21	0.684758	0.174003	3.93532	8.30862e-05	0.00100777
AT2G25690	100.702	0.68407	0.157208	4.35136	1.35293e-05	0.000206084
AT5G03620	40.5171	0.683936	0.25466	2.68568	0.00723824	0.040666
AT1G67910	107.922	0.683756	0.217645	3.1416	0.00168025	0.012527
AT3G14760	186.907	0.683697	0.140175	4.87745	1.07469e-06	2.18695e-05
AT3G25190	369.209	0.681784	0.218964	3.11368	0.0018477	0.0135001
AT2G39310	2411.9	0.681212	0.142535	4.77926	1.75943e-06	3.42006e-05
AT1G08230	311.084	0.680899	0.127169	5.3543	8.58875e-08	2.22603e-06
AT5G50335	77.216	0.680636	0.240915	2.82521	0.00472502	0.0288818
AT5G03350	281.8	0.678454	0.234181	2.89713	0.0037659	0.0239761
AT5G41050	252.424	0.677323	0.133263	5.08261	3.72282e-07	8.48753e-06
AT5G44750	1108.79	0.675508	0.0715987	9.43464	3.92324e-21	5.83947e-19
AT5G20740	252.935	0.675319	0.142702	4.73237	2.21916e-06	4.20008e-05
AT4G39795	41.2764	0.67469	0.248091	2.71953	0.00653753	0.0373948
AT3G17070	156.954	0.674681	0.15379	4.38703	1.14911e-05	0.000177767
AT4G27370	307.067	0.67431	0.117882	5.72021	1.06395e-08	3.35919e-07
AT2G38720	85.2724	0.674086	0.176452	3.82024	0.000133324	0.00151291
AT1G58520	459.908	0.674046	0.164747	4.0914	4.2878e-05	0.000570193
AT2G36145	1244.65	0.673705	0.102201	6.59195	4.34093e-11	2.01911e-09
AT3G05140	60.7335	0.672987	0.209711	3.20912	0.0013314	0.0103938
AT5G02950	103.402	0.672934	0.169192	3.97734	6.96901e-05	0.000870625
AT2G47920	75.3968	0.669512	0.193753	3.45548	0.000549305	0.00502896
AT1G55920	532.974	0.66875	0.120656	5.54259	2.98022e-08	8.51877e-07
AT4G27520	4399.54	0.667849	0.052159	12.8041	1.55528e-37	7.53695e-35
AT3G20470	257.157	0.667436	0.167304	3.98937	6.62489e-05	0.000833632
AT3G50840	240.071	0.666541	0.1585	4.2053	2.6074e-05	0.00036861
AT1G03820	214.38	0.665835	0.180686	3.68504	0.000228671	0.00241906
AT2G40400	1976.27	0.665761	0.0702834	9.47253	2.73137e-21	4.15447e-19
AT2G32870	847.038	0.662553	0.128369	5.16131	2.45222e-07	5.78701e-06
AT3G19710	2958.99	0.661126	0.105148	6.28759	3.22427e-10	1.33839e-08
AT3G03780	5130.84	0.661076	0.109648	6.02908	1.64896e-09	6.1032e-08
AT5G15450	2013.09	0.660399	0.0830935	7.94766	1.90075e-15	1.57174e-13
AT5G20630	3437.92	0.660252	0.0820525	8.0467	8.50579e-16	7.45315e-14
AT1G30270	635.612	0.659777	0.122061	5.40531	6.46948e-08	1.72835e-06
AT1G67070	59.036	0.65917	0.234734	2.80816	0.00498258	0.0300425
AT3G21420	61.644	0.657599	0.202061	3.25447	0.00113606	0.00910508
AT4G24960	328.864	0.65492	0.103833	6.30745	2.83662e-10	1.18932e-08
AT4G28680	107.084	0.654447	0.182462	3.58675	0.000334823	0.00334774
AT1G78070	361.517	0.653704	0.159396	4.10113	4.11139e-05	0.000549539
AT1G45201	3437.34	0.653082	0.124617	5.24071	1.59956e-07	3.926e-06
AT1G20160	255.649	0.651827	0.144762	4.50274	6.70822e-06	0.000110728
AT1G78090	62.0188	0.651338	0.242551	2.68537	0.00724505	0.0406824
AT5G59480	393.157	0.651214	0.0889556	7.32066	2.46753e-13	1.55814e-11
AT3G11090	220.887	0.650578	0.117226	5.54978	2.86022e-08	8.22087e-07
AT5G03285	51.5491	0.650554	0.237483	2.73937	0.00615566	0.0356918
AT2G38820	351.611	0.649766	0.131238	4.95104	7.38186e-07	1.55377e-05
AT2G32990	270.957	0.649263	0.149577	4.34067	1.42047e-05	0.000214958
AT4G39800	4477.77	0.649147	0.124744	5.20385	1.95197e-07	4.66458e-06
AT2G15080	621.519	0.648784	0.121711	5.33052	9.79309e-08	2.51007e-06
AT1G07890	8490.09	0.648217	0.0837314	7.74162	9.81595e-15	7.42558e-13
AT1G64950	679.774	0.647815	0.0962027	6.73385	1.65226e-11	8.13944e-10
AT3G16430	360.464	0.647712	0.200553	3.22964	0.00123947	0.00977596
AT3G08590	1806.14	0.647082	0.0867679	7.45762	8.80991e-14	5.96042e-12
AT3G09190	64.4112	0.646498	0.204886	3.1554	0.00160276	0.0120833
AT4G13430	8137.43	0.646432	0.0818885	7.89406	2.9252e-15	2.3718e-13
AT1G64900	992.84	0.644481	0.116738	5.52077	3.37514e-08	9.54289e-07
AT4G24972	326.168	0.64222	0.106696	6.01917	1.75317e-09	6.43177e-08
AT2G32290	73.976	0.641277	0.242109	2.64872	0.0080798	0.0443071
AT5G50240	89.6133	0.640759	0.181251	3.5352	0.00040746	0.00394731
AT3G03470	271.608	0.639873	0.152619	4.19263	2.75742e-05	0.000385114
AT4G32920	415.741	0.638708	0.114628	5.57199	2.51844e-08	7.32949e-07
AT5G25490	159.309	0.638189	0.149994	4.25476	2.09276e-05	0.000303683
AT1G19960	254.31	0.637578	0.20454	3.11713	0.0018262	0.0133712
AT5G56490	64.6126	0.63691	0.226686	2.80965	0.00495947	0.0299639
AT5G20700	3556.24	0.63642	0.0958876	6.63714	3.19829e-11	1.52508e-09
AT1G02205	985.251	0.635549	0.144351	4.4028	1.06862e-05	0.00016705
AT4G37980	2407.87	0.635305	0.121505	5.22862	1.70783e-07	4.13811e-06
AT3G58990	1316.76	0.633765	0.0919519	6.89236	5.48758e-12	2.85163e-10
AT3G08770	1599.42	0.633602	0.116434	5.44175	5.276e-08	1.43526e-06
AT1G47960	140.765	0.633555	0.156381	4.05135	5.09231e-05	0.000658682
AT1G12845	141.874	0.633085	0.182942	3.46059	0.000538998	0.00495222
AT4G38380	133.589	0.632567	0.162116	3.90194	9.54245e-05	0.00113886
AT3G01510	447.494	0.632548	0.110786	5.70962	1.13228e-08	3.53739e-07
AT2G47180	707	0.630907	0.143597	4.3936	1.11489e-05	0.000173374
AT3G60520	98.9874	0.630825	0.172613	3.65455	0.00025763	0.00267667
AT2G32960	70.3371	0.630585	0.210737	2.99228	0.00276905	0.018783
AT2G14750	1690.69	0.630245	0.104342	6.04016	1.53961e-09	5.73925e-08
AT3G55290	100.574	0.630109	0.221765	2.84133	0.00449253	0.0277708
AT2G21210	501.278	0.629853	0.150606	4.18212	2.88801e-05	0.000402275
AT3G27640	58.2194	0.629078	0.223786	2.81107	0.0049377	0.0298561
AT1G04000	151.413	0.628114	0.13634	4.60695	4.08614e-06	7.13124e-05
AT3G54600	1657.09	0.627095	0.112945	5.55221	2.82076e-08	8.11865e-07
AT2G28470	2909.1	0.627044	0.0836238	7.49839	6.46081e-14	4.41411e-12
AT5G38980	1272.4	0.626014	0.15097	4.14663	3.3741e-05	0.000462258
AT4G32570	937.873	0.624093	0.0880996	7.08395	1.401e-12	7.91167e-11
AT5G22140	54.3055	0.623621	0.236579	2.636	0.00838906	0.0456426
AT3G18710	180.527	0.623297	0.15375	4.05396	5.03568e-05	0.000653384
AT5G63790	430.451	0.622944	0.134037	4.64755	3.35908e-06	6.02898e-05
AT5G67180	102.906	0.622203	0.179289	3.47039	0.000519697	0.00480881
AT1G73330	4021.7	0.621643	0.156094	3.9825	6.81945e-05	0.0008548
AT5G59650	93.012	0.621638	0.193208	3.21746	0.00129331	0.0101316
AT2G31200	445.581	0.621384	0.108071	5.74979	8.93524e-09	2.87334e-07
AT1G24020	2260.17	0.620897	0.0892584	6.95618	3.49621e-12	1.86805e-10
AT2G22330	1079.27	0.618566	0.121583	5.08762	3.62578e-07	8.28444e-06
AT4G27070	244.899	0.618342	0.135438	4.56551	4.98292e-06	8.50117e-05
AT5G57790	120.363	0.618065	0.165211	3.74107	0.00018324	0.00199809
AT2G22890	56.2478	0.617615	0.219726	2.81085	0.00494112	0.0298617
AT3G48350	297.953	0.616394	0.10948	5.63018	1.80024e-08	5.36674e-07
AT5G54470	87.8283	0.616072	0.183809	3.3517	0.000803166	0.00687326
AT4G14040	5622.66	0.615649	0.104901	5.86886	4.38802e-09	1.50047e-07
AT5G37260	102.794	0.615424	0.215791	2.85194	0.00434526	0.027045
AT3G47540	142.902	0.613774	0.143043	4.29084	1.77995e-05	0.00026324
AT1G32780	90.3834	0.613772	0.199271	3.08009	0.00206939	0.0148338
AT3G45600	396.589	0.613313	0.133257	4.60248	4.17489e-06	7.2618e-05
AT4G16690	170.065	0.61308	0.155771	3.93578	8.2926e-05	0.00100641
AT3G47340	3947.68	0.611906	0.100438	6.09236	1.11256e-09	4.28531e-08
AT2G42200	145.104	0.611454	0.164312	3.72129	0.000198205	0.00213667
AT4G14020	198.55	0.610055	0.132072	4.6191	3.854e-06	6.78865e-05
AT4G39940	1652.57	0.609018	0.125734	4.84371	1.27439e-06	2.5559e-05
AT1G74670	3163.61	0.606306	0.107035	5.66454	1.47423e-08	4.47162e-07
AT1G16730	181.797	0.605924	0.204774	2.95899	0.00308646	0.0205023
AT5G64770	1138.96	0.603916	0.12501	4.83095	1.35882e-06	2.70959e-05
AT4G08870	1787.14	0.603915	0.137326	4.39769	1.0941e-05	0.00017065
AT3G55110	180.919	0.603037	0.139401	4.3259	1.51908e-05	0.000228884
AT1G80850	85.0263	0.602648	0.20063	3.00377	0.00266653	0.018236
AT5G11460	99.9278	0.601819	0.1805	3.33418	0.000855524	0.00725531
AT4G35160	139.385	0.601492	0.206687	2.91017	0.00361235	0.0232737
AT4G12030	918.624	0.601235	0.0857993	7.00746	2.42679e-12	1.34137e-10
AT3G25770	1334.69	0.601026	0.119283	5.03867	4.68771e-07	1.04139e-05
AT4G24790	302.571	0.599598	0.109187	5.49148	3.98587e-08	1.11039e-06
AT4G15550	351.244	0.599434	0.173705	3.45088	0.000558768	0.00510237
AT5G50010	134.523	0.598759	0.151017	3.96483	7.34474e-05	0.000907768
AT5G13490	429.505	0.596102	0.127859	4.66217	3.12898e-06	5.65007e-05
AT3G15950	2338.61	0.594898	0.135338	4.39564	1.10446e-05	0.00017188
AT3G21090	122.103	0.594314	0.165901	3.58235	0.000340519	0.00338054
AT1G46554	66.2442	0.593503	0.195184	3.04073	0.00236003	0.0165028
AT3G10940	668.017	0.592504	0.109451	5.41341	6.18358e-08	1.65835e-06
AT3G01440	531.402	0.592411	0.113053	5.24013	1.60468e-07	3.93391e-06
AT1G78380	7213.52	0.592113	0.0673399	8.7929	1.45746e-18	1.7256e-16
AT4G16880	462.991	0.591998	0.0896346	6.60458	3.98651e-11	1.85841e-09
AT4G16008	151.742	0.590217	0.16567	3.56261	0.000367187	0.00361428
AT3G54390	166.927	0.590071	0.136724	4.31578	1.59041e-05	0.00023894
AT5G22794	85.4125	0.589679	0.184717	3.19233	0.00141128	0.010892
AT4G39510	508.818	0.587713	0.128953	4.55758	5.17468e-06	8.78094e-05
AT3G21250	1183.09	0.587289	0.0822068	7.14404	9.06259e-13	5.24573e-11
AT2G29320	584.914	0.587212	0.116628	5.03491	4.78069e-07	1.05979e-05
AT5G13740	1031.25	0.586357	0.151775	3.86334	0.000111846	0.00130569
AT4G11211	447.481	0.586252	0.100801	5.81592	6.03e-09	2.01227e-07
AT4G35090	15169.4	0.586114	0.109751	5.34042	9.27323e-08	2.38562e-06
AT2G29890	470.956	0.586013	0.101759	5.75886	8.46843e-09	2.73709e-07
AT1G04020	214.544	0.585755	0.113742	5.14987	2.60669e-07	6.11004e-06
AT3G03770	756.308	0.584159	0.126458	4.61939	3.84877e-06	6.78517e-05
AT4G37150	113.696	0.582392	0.21818	2.66931	0.00760064	0.0423369
AT1G20693	2387.61	0.581383	0.0830409	7.00116	2.53855e-12	1.39573e-10
AT2G15620	6207.53	0.580086	0.06529	8.88475	6.40651e-19	7.80695e-17
AT5G63980	1017.65	0.579946	0.072189	8.03372	9.45625e-16	8.17632e-14
AT5G57780	256.474	0.579516	0.161794	3.58181	0.000341225	0.00338593
AT2G46640	188.558	0.579141	0.147853	3.91701	8.96541e-05	0.0010774
AT2G26870	140.84	0.57898	0.141317	4.09704	4.18467e-05	0.000557903
AT2G36630	538.088	0.578582	0.129923	4.45328	8.45694e-06	0.000136082
AT1G63080	101.436	0.577135	0.180941	3.18962	0.00142458	0.0109743
AT4G11600	1186.46	0.576925	0.119607	4.82351	1.41054e-06	2.79135e-05
AT5G21430	1362.29	0.576134	0.108281	5.32073	1.03353e-07	2.6393e-06
AT4G37300	4324.71	0.575069	0.0850367	6.7626	1.35535e-11	6.75664e-10
AT5G19850	380.002	0.574357	0.131835	4.35663	1.32079e-05	0.000201483
AT5G49100	457.501	0.57415	0.0894137	6.42127	1.35141e-10	5.90369e-09
AT3G51290	265.025	0.573193	0.123679	4.63453	3.57746e-06	6.35526e-05
AT1G19650	460.461	0.572804	0.127011	4.50988	6.48634e-06	0.000107272
AT3G44990	913.557	0.572491	0.169778	3.37201	0.000746219	0.00649701
AT5G52810	90.1584	0.572324	0.175041	3.26966	0.00107677	0.00870354
AT5G60890	573.699	0.572198	0.118289	4.83728	1.31631e-06	2.62733e-05
AT5G47560	2285.6	0.571802	0.120278	4.75402	1.99416e-06	3.82095e-05
AT5G48150	741.56	0.57128	0.0952911	5.9951	2.03358e-09	7.34416e-08
AT5G02440	69.9623	0.570022	0.183856	3.10038	0.00193274	0.0139745
AT5G19875	70.8191	0.569746	0.208647	2.73067	0.00632065	0.0364544
AT1G61000	146.138	0.568014	0.159589	3.55923	0.000371948	0.00365597
AT2G01918	213.843	0.567023	0.145561	3.89544	9.80194e-05	0.00116716
AT1G73390	473.881	0.565889	0.103418	5.47184	4.45382e-08	1.23088e-06
AT4G04020	1616.65	0.565013	0.107943	5.23437	1.6555e-07	4.03949e-06
AT5G57785	259.394	0.564594	0.133674	4.22367	2.40353e-05	0.000343989
AT1G74880	1644.3	0.563404	0.0966122	5.8316	5.48975e-09	1.84807e-07
AT2G45280	80.3178	0.562273	0.172186	3.2655	0.00109271	0.00881531
AT3G27060	936.94	0.561455	0.0923082	6.08239	1.18401e-09	4.52705e-08
AT1G23740	4555.81	0.560781	0.106513	5.26492	1.40248e-07	3.49581e-06
AT4G27830	473.657	0.560151	0.0892186	6.27841	3.42054e-10	1.41143e-08
AT1G67180	85.18	0.559477	0.189809	2.94758	0.00320271	0.0210996
AT2G24270	7676.76	0.559335	0.0836347	6.68783	2.265e-11	1.09693e-09
AT5G18060	89.7412	0.559298	0.192619	2.90365	0.00368845	0.0236644
AT5G17700	441.53	0.558427	0.151662	3.68206	0.000231361	0.00243983
AT5G44490	103.576	0.557241	0.164683	3.38371	0.00071513	0.00627448
AT5G48480	757.36	0.556679	0.0960728	5.79434	6.85899e-09	2.25083e-07
AT1G30320	212.868	0.556544	0.128364	4.33567	1.45317e-05	0.000219428
AT5G03230	317.527	0.556502	0.18025	3.08738	0.00201927	0.0145245
AT1G51460	113.052	0.55648	0.17378	3.2022	0.0013638	0.010608
AT3G55630	1022.27	0.556286	0.0713798	7.79332	6.52722e-15	5.05629e-13
AT1G17050	867.388	0.556107	0.112719	4.93358	8.07355e-07	1.67566e-05
AT5G05270	472.554	0.555605	0.192317	2.88901	0.0038646	0.0244923
AT2G43510	109.154	0.555387	0.173585	3.19951	0.0013766	0.0106916
AT3G48460	313.442	0.555018	0.153887	3.60666	0.000310162	0.00312834
AT3G16450	2150.37	0.5531	0.149191	3.70734	0.000209451	0.00224052
AT5G52420	382.824	0.550154	0.117699	4.67426	2.95015e-06	5.35965e-05
AT3G16910	820.604	0.549355	0.128149	4.28684	1.81235e-05	0.000267273
AT3G28130	345.013	0.549222	0.118792	4.62338	3.7754e-06	6.67843e-05
AT3G01060	2113.83	0.548516	0.0924875	5.9307	3.01646e-09	1.05998e-07
AT2G36430	303.608	0.548329	0.11681	4.69418	2.67677e-06	4.9493e-05
AT2G46270	186.162	0.5482	0.177088	3.09564	0.00196388	0.01418
AT5G61420	1222.85	0.548176	0.0787104	6.96446	3.29657e-12	1.77504e-10
AT1G20190	829.834	0.54813	0.114284	4.79621	1.61699e-06	3.16383e-05
AT5G44400	717.312	0.547995	0.10827	5.06137	4.16261e-07	9.41808e-06
AT5G62790	3893.2	0.54567	0.0739541	7.37849	1.60097e-13	1.02966e-11
AT3G21360	145.558	0.544751	0.148072	3.67896	0.000234185	0.00246586
AT5G67150	343.363	0.5441	0.128902	4.22104	2.43182e-05	0.000347322
AT3G05030	291.14	0.542335	0.137521	3.94367	8.02449e-05	0.000978434
AT1G05870	552.271	0.541662	0.0975061	5.55516	2.77361e-08	8.01616e-07
AT4G32770	737.006	0.541278	0.113059	4.78758	1.68808e-06	3.28749e-05
AT4G28660	2770.99	0.540692	0.095021	5.69024	1.2686e-08	3.92212e-07
AT5G02830	866.437	0.54003	0.0905896	5.96128	2.50274e-09	8.8845e-08
AT4G28230	122.292	0.538342	0.154931	3.47472	0.000511388	0.0047488
AT5G47550	213.962	0.537227	0.138099	3.89015	0.000100182	0.00118883
AT5G37290	108.114	0.535359	0.173702	3.08206	0.00205573	0.014752
AT3G50890	98.2015	0.535004	0.174084	3.07325	0.00211744	0.0151055
AT1G09230	346.488	0.534898	0.107063	4.99613	5.84937e-07	1.26572e-05
AT2G38530	634.992	0.534818	0.14789	3.61632	0.000298822	0.00302568
AT1G10370	729.725	0.534295	0.129201	4.13539	3.54349e-05	0.000483241
AT5G14640	584.749	0.534018	0.0929103	5.74768	9.04786e-09	2.90507e-07
AT3G48690	1155.3	0.533627	0.110241	4.84056	1.29474e-06	2.59172e-05
AT1G65900	213.98	0.533232	0.118064	4.51648	6.28764e-06	0.000104317
AT2G37620	351.15	0.532049	0.115432	4.60919	4.04237e-06	7.06668e-05
AT3G10840	465.754	0.531899	0.0885303	6.00811	1.87703e-09	6.82441e-08
AT3G21870	244.613	0.531684	0.159042	3.34304	0.000828651	0.00706524
AT2G31190	345.708	0.530807	0.119979	4.42416	9.6818e-06	0.00015284
AT1G24100	939.379	0.530541	0.101547	5.22458	1.74549e-07	4.21465e-06
AT3G61990	260.303	0.528518	0.185906	2.84293	0.00447008	0.0276648
AT2G26690	1317.69	0.527176	0.111022	4.7484	2.05035e-06	3.90916e-05
AT5G35180	1449.54	0.526912	0.0651644	8.0859	6.1709e-16	5.51885e-14
AT4G12970	274.329	0.526869	0.129418	4.07105	4.68017e-05	0.000614914
AT5G24380	126.478	0.526588	0.186013	2.83093	0.00464135	0.0284795
AT5G58330	7098.52	0.526305	0.0698155	7.53851	4.75355e-14	3.30182e-12
AT5G01990	154.522	0.525742	0.136054	3.86422	0.000111443	0.00130244
AT1G19140	395.119	0.52458	0.112966	4.64371	3.42206e-06	6.13673e-05
AT3G61220	722.469	0.524336	0.1426	3.67698	0.000236012	0.00248248
AT1G73620	180.239	0.524251	0.142128	3.68858	0.000225513	0.00238853
AT2G46290	91.4154	0.523685	0.17727	2.95417	0.00313506	0.0207722
AT1G70300	302.264	0.522581	0.151156	3.45723	0.000545753	0.00500381
AT2G14050	119.117	0.522367	0.155207	3.36562	0.000763725	0.00661725
AT1G06690	1215.84	0.521337	0.0820443	6.35434	2.09323e-10	8.90179e-09
AT3G22200	2029.12	0.521071	0.0725071	7.18649	6.648e-13	3.92439e-11
AT5G58340	212.855	0.52071	0.127084	4.09738	4.17851e-05	0.000557794
AT3G52960	4418.36	0.520457	0.0691922	7.5219	5.39873e-14	3.71283e-12
AT1G60160	699.14	0.520367	0.0833599	6.24241	4.30868e-10	1.74678e-08
AT1G62950	117.815	0.519842	0.146244	3.55462	0.000378529	0.0037119
AT4G39950	1001.84	0.519786	0.15036	3.45694	0.000546337	0.00500641
AT4G20880	256.983	0.51957	0.117152	4.43499	9.20746e-06	0.000146798
AT4G34250	507.88	0.517876	0.124307	4.1661	3.0986e-05	0.000427891
AT1G42970	38689.1	0.517229	0.104091	4.96902	6.72935e-07	1.43527e-05
AT5G23010	8624.77	0.517056	0.098494	5.24962	1.52416e-07	3.76309e-06
AT1G26230	416.313	0.516573	0.0944972	5.46654	4.58899e-08	1.26494e-06
AT4G00200	91.9171	0.516228	0.191569	2.69474	0.00704438	0.0397376
AT5G66460	212.712	0.515242	0.119189	4.32291	1.53985e-05	0.000231511
AT2G46735	196.57	0.513909	0.155315	3.30882	0.000936908	0.00776678
AT1G54100	1249.5	0.513283	0.092983	5.52018	3.38647e-08	9.56195e-07
AT5G26340	255.625	0.512973	0.143717	3.56932	0.000357913	0.00353302
AT1G11850	567.958	0.512487	0.174634	2.93463	0.00333942	0.0218324
AT1G01110	76.6461	0.512147	0.183263	2.7946	0.00519641	0.0310533
AT5G07460	609.186	0.511706	0.105603	4.84558	1.26242e-06	2.53921e-05
AT5G27890	211.903	0.510809	0.1333	3.83203	0.000127089	0.0014535
AT1G74580	147.637	0.510695	0.132246	3.8617	0.000112601	0.00131303
AT3G01920	306.623	0.510222	0.134317	3.79865	0.000145484	0.00163077
AT5G65820	101.654	0.509752	0.166723	3.05747	0.00223213	0.0157354
AT1G76570	264.191	0.509355	0.141773	3.59275	0.000327201	0.00328431
AT1G72680	276.087	0.509021	0.102667	4.95799	7.12253e-07	1.50374e-05
AT2G18560	337.344	0.508269	0.11596	4.38315	1.16975e-05	0.000180156
AT2G45023	64.5108	0.50806	0.187771	2.70575	0.00681507	0.038685
AT1G11600	351.299	0.50793	0.13563	3.74497	0.000180413	0.00197689
AT2G43535	498.025	0.507532	0.145134	3.49699	0.000470532	0.00443061
AT5G08570	1305.16	0.507334	0.0723988	7.0075	2.42619e-12	1.34137e-10
AT5G60680	839.459	0.507212	0.102095	4.96803	6.76377e-07	1.43967e-05
AT3G26180	875.649	0.505446	0.117359	4.30683	1.65613e-05	0.000247032
AT5G16990	379.381	0.504831	0.125179	4.03287	5.50994e-05	0.000709179
AT3G53210	83.8083	0.504752	0.172196	2.93127	0.0033758	0.022035
AT2G15580	764.494	0.503356	0.104236	4.82901	1.37213e-06	2.7335e-05
AT4G12130	134.922	0.502776	0.137246	3.66332	0.000248965	0.00260439
AT5G44930	207.291	0.502376	0.147803	3.39897	0.000676409	0.00598007
AT1G64390	1462	0.502315	0.108334	4.63671	3.54001e-06	6.31024e-05
AT1G18040	149.029	0.500309	0.14974	3.34118	0.000834216	0.00710396
AT2G06040	161.703	0.500191	0.151179	3.30861	0.000937595	0.00776843
AT1G10780	135.29	0.499782	0.149657	3.33951	0.000839262	0.00714109
AT4G25120	158.948	0.49919	0.142794	3.49588	0.000472499	0.00444324
AT1G54030	711.704	0.499145	0.105615	4.7261	2.28878e-06	4.32008e-05
AT5G55120	719.993	0.498514	0.105019	4.74688	2.0658e-06	3.93124e-05
AT3G14420	23785.8	0.498064	0.0993332	5.01408	5.3288e-07	1.16911e-05
AT1G78680	1220.93	0.497772	0.0796057	6.25297	4.02732e-10	1.64552e-08
AT2G32150	1092.34	0.497649	0.163768	3.03875	0.00237561	0.0165845
AT2G40935	114.433	0.497514	0.146434	3.39754	0.000679951	0.00600628
AT1G21440	2035.43	0.496291	0.109351	4.53852	5.66497e-06	9.53526e-05
AT5G57050	207.757	0.496226	0.149098	3.32818	0.000874163	0.00736001
AT1G05310	124.209	0.495587	0.165307	2.99798	0.00271775	0.0185134
AT1G05780	72.8528	0.494613	0.181359	2.72726	0.00638629	0.0367009
AT1G02180	73.0417	0.494303	0.189123	2.61367	0.00895766	0.048071
AT5G20850	78.6649	0.493918	0.180403	2.73786	0.00618397	0.0358148
AT1G13440	18039	0.4936	0.0799896	6.1708	6.79443e-10	2.70712e-08
AT4G20930	153.078	0.492282	0.143705	3.42564	0.00061335	0.00551856
AT1G10660	547.576	0.491596	0.0821614	5.9833	2.1866e-09	7.82892e-08
AT1G62422	117.116	0.491549	0.172651	2.84706	0.00441246	0.0273896
AT5G29000	165.565	0.491305	0.138733	3.54138	0.000398035	0.00386859
AT4G22240	2226.09	0.491101	0.097321	5.0462	4.50695e-07	1.00768e-05
AT2G20610	1723.6	0.490334	0.0668442	7.33548	2.20923e-13	1.40353e-11
AT3G05180	223.393	0.48868	0.126815	3.85347	0.000116454	0.00134815
AT1G47210	254.668	0.487795	0.122649	3.97715	6.97453e-05	0.000870792
AT5G26160	231.936	0.487536	0.117746	4.14057	3.46446e-05	0.000473703
AT3G21750	451.49	0.487313	0.107741	4.52302	6.0963e-06	0.000101628
AT1G66730	543.188	0.487297	0.0987804	4.93314	8.09188e-07	1.67613e-05
AT2G23150	212.017	0.486937	0.126112	3.86114	0.000112859	0.00131474
AT2G24280	1593.48	0.486174	0.101831	4.77433	1.80309e-06	3.49839e-05
AT1G19970	103.873	0.484834	0.165601	2.92773	0.00341449	0.0222208
AT4G31805	130.091	0.483833	0.166704	2.90234	0.00370383	0.0237332
AT2G39780	746.794	0.482889	0.0790253	6.11057	9.92781e-10	3.83814e-08
AT1G76790	646.69	0.482801	0.184092	2.62261	0.00872579	0.0470886
AT3G57430	200.155	0.482226	0.144795	3.3304	0.000867204	0.00733095
AT2G36870	421.688	0.482048	0.143602	3.35683	0.000788419	0.00678327
AT1G05170	180.38	0.481641	0.139084	3.46294	0.000534303	0.0049221
AT1G72230	212.93	0.481014	0.14527	3.31118	0.000929031	0.00772239
AT3G20200	80.8101	0.480589	0.180971	2.65562	0.00791636	0.0436752
AT1G23205	149.919	0.479891	0.184467	2.60151	0.0092815	0.0495283
AT5G28030	115.449	0.479863	0.172235	2.7861	0.00533464	0.0316705
AT1G19670	1072.58	0.479164	0.161564	2.96578	0.00301919	0.020126
AT5G54530	133.892	0.478934	0.155117	3.08757	0.00201802	0.0145206
AT1G32520	326.602	0.478739	0.158071	3.02863	0.00245665	0.0170582
AT5G59870	1813.03	0.478117	0.0843358	5.6692	1.43464e-08	4.37061e-07
AT4G32980	701.571	0.477469	0.0953519	5.00744	5.51585e-07	1.20355e-05
AT3G62080	169.245	0.477417	0.126353	3.77844	0.000157813	0.00175649
AT1G60270	254.934	0.476576	0.158735	3.00235	0.00267906	0.0182958
AT1G07180	1630.93	0.476454	0.101004	4.71716	2.39155e-06	4.47755e-05
AT5G45400	95.3265	0.476284	0.166987	2.85222	0.00434156	0.02703
AT3G26280	691.454	0.476141	0.157184	3.0292	0.00245199	0.0170372
AT3G01890	162.737	0.475756	0.133632	3.56019	0.000370593	0.00364437
AT2G27150	423.459	0.474263	0.0939656	5.0472	4.48334e-07	1.00348e-05
AT1G73600	8551.65	0.47386	0.142632	3.32225	0.00089295	0.00748182
AT5G38530	413.293	0.473832	0.115139	4.11529	3.86687e-05	0.000520865
AT2G33180	612.02	0.473554	0.0887058	5.33848	9.37307e-08	2.40834e-06
AT3G52630	102.686	0.473319	0.161481	2.93111	0.00337748	0.022035
AT2G39850	882.948	0.472813	0.0914747	5.16878	2.3563e-07	5.57962e-06
AT3G13110	896.653	0.472406	0.0918482	5.14334	2.69897e-07	6.29801e-06
AT3G06510	1757.19	0.471891	0.0959776	4.91668	8.8024e-07	1.81249e-05
AT2G21590	141.776	0.471822	0.156929	3.0066	0.00264191	0.0180914
AT5G18170	1315.18	0.471622	0.10877	4.33596	1.45124e-05	0.000219296
AT3G15900	335.119	0.471086	0.100494	4.68768	2.76322e-06	5.0811e-05
AT5G54840	126.992	0.470795	0.147633	3.18895	0.00142788	0.0109916
AT4G38810	806.097	0.470352	0.0855028	5.50101	3.77612e-08	1.05762e-06
AT2G27385	3410.33	0.469576	0.0997641	4.70686	2.51557e-06	4.6803e-05
AT5G59130	578.71	0.469543	0.150988	3.10981	0.0018721	0.0136259
AT4G31310	313.462	0.468895	0.123905	3.78432	0.000154127	0.00171932
AT2G06050	720.369	0.468846	0.120492	3.8911	9.97895e-05	0.00118553
AT5G39590	1140.39	0.468685	0.0793002	5.91026	3.41573e-09	1.18826e-07
AT1G04425	102.625	0.468171	0.178422	2.62395	0.00869169	0.0469459
AT1G62660	1278.12	0.467491	0.177229	2.63778	0.00834499	0.0454616
AT3G27350	452.25	0.466792	0.134349	3.47447	0.00051186	0.00474895
AT4G25450	918.587	0.466587	0.090471	5.15731	2.50527e-07	5.90552e-06
AT5G38590	99.061	0.466494	0.177713	2.62498	0.00866549	0.046853
AT1G79160	255.942	0.466459	0.142946	3.26319	0.00110167	0.00887384
AT1G69252	555.278	0.466057	0.0935076	4.98416	6.22312e-07	1.33964e-05
AT2G39450	666.283	0.465514	0.0739739	6.29295	3.11484e-10	1.29555e-08
AT3G49680	3203.44	0.465458	0.0748529	6.2183	5.02575e-10	2.02959e-08
AT1G34570	305.873	0.465429	0.118228	3.93671	8.26061e-05	0.0010037
AT5G63180	1168.05	0.464995	0.176905	2.6285	0.00857617	0.0464379
AT2G17900	94.8263	0.463698	0.158195	2.93118	0.00337682	0.022035
AT1G23000	176.728	0.463419	0.136834	3.38673	0.000707316	0.00621639
AT1G15060	553.795	0.461993	0.08824	5.23564	1.64418e-07	4.01659e-06
AT5G62530	832.592	0.46185	0.0912869	5.05933	4.20742e-07	9.49137e-06
AT3G62000	257.304	0.461127	0.114908	4.01301	5.99493e-05	0.000765125
AT5G43150	503.738	0.460614	0.13604	3.38587	0.000709534	0.00623325
AT2G21330	22728.1	0.460369	0.118571	3.88264	0.000103329	0.00122131
AT2G03090	628.799	0.459639	0.17289	2.65857	0.00784735	0.0434094
AT5G20935	107.322	0.459202	0.157729	2.91133	0.00359889	0.0232107
AT2G45660	962.51	0.458865	0.109389	4.19479	2.73128e-05	0.00038172
AT1G09200	2396.28	0.458699	0.0754875	6.07649	1.22845e-09	4.67979e-08
AT2G17650	99.0159	0.458301	0.167578	2.73486	0.00624073	0.0360834
AT4G37540	711.318	0.457361	0.115143	3.9721	7.12416e-05	0.000886818
AT1G10960	5034.87	0.456909	0.0875998	5.21586	1.82964e-07	4.38734e-06
AT2G22800	103.158	0.455233	0.158337	2.87509	0.00403914	0.0254822
AT1G70730	1792.74	0.454988	0.0864237	5.26462	1.40478e-07	3.49735e-06
AT1G58280	215.984	0.454961	0.131907	3.44909	0.000562474	0.00512723
AT5G10390	452.452	0.4549	0.0847871	5.3652	8.08588e-08	2.11145e-06
AT2G34460	1324.47	0.454763	0.097101	4.6834	2.82152e-06	5.16651e-05
AT2G38710	436.424	0.454687	0.0969778	4.68857	2.75119e-06	5.06443e-05
AT4G37310	507.578	0.454461	0.143105	3.17572	0.00149465	0.0114318
AT1G10310	395.754	0.45366	0.120905	3.7522	0.000175293	0.00192757
AT1G37130	14021.2	0.453401	0.0976419	4.6435	3.42552e-06	6.13766e-05
AT3G22880	195.143	0.452506	0.117673	3.84545	0.000120332	0.00138841
AT5G58350	454.029	0.452342	0.129725	3.48692	0.000488622	0.00456861
AT2G40690	305.966	0.451235	0.104969	4.29874	1.71772e-05	0.000255124
AT3G01750	125.874	0.450806	0.155128	2.90602	0.00366056	0.023521
AT3G15020	446.309	0.449329	0.0991725	4.53078	5.87649e-06	9.83721e-05
AT5G03390	119.33	0.449307	0.154789	2.90271	0.00369943	0.0237196
AT3G14750	107.514	0.448509	0.172149	2.60535	0.00917801	0.0490514
AT5G48640	263.961	0.446833	0.112421	3.97463	7.049e-05	0.000878511
AT3G02660	527.175	0.446667	0.0939264	4.7555	1.97959e-06	3.80295e-05
AT5G53120	526.308	0.446582	0.0929947	4.80223	1.56911e-06	3.07882e-05
AT3G10080	256.627	0.446081	0.124274	3.58949	0.000331327	0.00331773
AT3G11600	158.729	0.446074	0.16188	2.75558	0.00585875	0.0342646
AT5G16310	114.47	0.445675	0.16496	2.70172	0.00689815	0.0390593
AT1G54220	500.023	0.445336	0.0824477	5.40144	6.61085e-08	1.75935e-06
AT2G30695	680.815	0.445114	0.0947272	4.6989	2.61568e-06	4.8579e-05
AT5G49160	1157.29	0.44503	0.0671625	6.62617	3.44502e-11	1.62783e-09
AT2G48000	230.923	0.444895	0.118431	3.75656	0.000172262	0.00190299
AT4G04870	157.324	0.444683	0.132605	3.35345	0.000798104	0.00683836
AT4G14880	6659.82	0.444155	0.0543917	8.16588	3.19112e-16	2.94232e-14
AT4G33660	286.851	0.443632	0.116433	3.81019	0.000138857	0.00156575
AT5G01630	219.6	0.443522	0.131973	3.3607	0.000777465	0.00671954
AT4G08280	477.346	0.442796	0.0843315	5.25066	1.51558e-07	3.75971e-06
AT4G21570	545.613	0.442654	0.0984405	4.49667	6.90275e-06	0.000113528
AT2G21560	170.307	0.442593	0.146046	3.0305	0.00244148	0.0169698
AT1G28610	323.652	0.442591	0.140921	3.1407	0.00168544	0.0125558
AT4G17550	256.238	0.442375	0.131065	3.37524	0.00073751	0.006441
AT1G60700	104.508	0.442073	0.154008	2.87045	0.00409883	0.0258118
AT3G17640	157.66	0.441805	0.148005	2.98507	0.00283516	0.0191442
AT5G58575	113.2	0.441618	0.159405	2.77041	0.00559858	0.0330061
AT3G63430	90.47	0.441603	0.166254	2.6562	0.00790277	0.0436233
AT1G74100	775.698	0.441349	0.11419	3.86503	0.000111074	0.00129908
AT1G01470	880.058	0.441344	0.114132	3.86694	0.000110208	0.00129091
AT4G00760	214.614	0.439896	0.113862	3.8634	0.000111821	0.00130569
AT4G04620	171.607	0.43938	0.131022	3.35348	0.000798008	0.00683836
AT5G02010	228.123	0.439118	0.124571	3.52505	0.000423405	0.00406211
AT2G45630	152.887	0.438798	0.128044	3.42694	0.000610417	0.0054993
AT5G40890	2644	0.438103	0.0954129	4.59165	4.39753e-06	7.59833e-05
AT5G38520	2562.36	0.437029	0.0998582	4.3765	1.20602e-05	0.000185332
AT3G55120	252.372	0.436747	0.133649	3.26786	0.00108364	0.00875227
AT5G65360	2561.72	0.436389	0.0644123	6.77494	1.24456e-11	6.23419e-10
AT1G66350	126.444	0.436335	0.159076	2.74294	0.00608923	0.0353644
AT4G34190	4006.91	0.435805	0.0870192	5.00814	5.49577e-07	1.20043e-05
AT5G52570	526.466	0.43578	0.132343	3.29282	0.000991889	0.00815149
AT4G14620	309.515	0.435288	0.163751	2.65824	0.00785508	0.0434406
AT1G62850	344.574	0.43502	0.0976596	4.45446	8.4105e-06	0.000135649
AT3G03980	255.961	0.434886	0.111469	3.90141	9.56323e-05	0.00114004
AT1G09310	13601	0.434874	0.105691	4.11457	3.87894e-05	0.000522153
AT3G05130	229.836	0.434615	0.112793	3.85321	0.00011658	0.00134886
AT5G66590	551.62	0.434589	0.125553	3.46141	0.000537362	0.00494125
AT4G21860	2202.48	0.434524	0.0756525	5.74368	9.26419e-09	2.9654e-07
AT5G52520	1440.75	0.434077	0.0750819	5.78138	7.40903e-09	2.4237e-07
AT5G63960	323.539	0.433736	0.0934819	4.63979	3.48771e-06	6.23836e-05
AT3G10340	262.869	0.432982	0.136998	3.1605	0.00157496	0.0119212
AT2G18940	657.607	0.432862	0.0797952	5.42466	5.80659e-08	1.5653e-06
AT5G05990	165.055	0.432644	0.158935	2.72214	0.00648598	0.0371304
AT1G77590	1401.69	0.432303	0.06593	6.55699	5.49039e-11	2.52558e-09
AT2G22770	240.155	0.432097	0.147644	2.92662	0.00342669	0.0222863
AT2G03550	605.018	0.431829	0.14864	2.9052	0.00367023	0.0235759
AT3G06050	1170.42	0.430966	0.0578288	7.45246	9.16191e-14	6.15858e-12
AT4G02420	214.591	0.430881	0.162768	2.6472	0.00811602	0.0444589
AT3G09250	185.939	0.430311	0.139861	3.0767	0.00209302	0.0149621
AT5G57815	384.25	0.43012	0.0979826	4.38976	1.13477e-05	0.000176071
AT1G15710	258.679	0.42899	0.117374	3.6549	0.000257286	0.00267594
AT5G08110	167.961	0.428846	0.137204	3.12562	0.00177433	0.0130649
AT1G78970	469.263	0.428157	0.156298	2.73936	0.00615588	0.0356918
AT5G03190	246.274	0.428122	0.13224	3.23745	0.00120603	0.00955565
AT2G15090	1049.65	0.427286	0.0683628	6.25027	4.09748e-10	1.67091e-08
AT5G59350	232.213	0.427048	0.130016	3.28458	0.00102135	0.00834949
AT3G57050	1495.96	0.426995	0.059005	7.23658	4.6014e-13	2.76322e-11
AT3G56080	410.869	0.426931	0.139597	3.05831	0.00222588	0.015707
AT5G20220	93.8011	0.426901	0.160911	2.65302	0.00797748	0.0439193
AT1G45191	273.09	0.426853	0.158744	2.68893	0.00716804	0.040326
AT3G01470	529.356	0.426781	0.0910459	4.68754	2.76513e-06	5.0811e-05
AT3G21260	228.688	0.426695	0.128535	3.31969	0.000901165	0.00753551
AT2G22900	288.816	0.426319	0.137179	3.10775	0.00188515	0.0136956
AT1G80370	177.947	0.42611	0.148604	2.86743	0.00413824	0.0260207
AT4G39710	1551.12	0.42545	0.104927	4.05473	5.01912e-05	0.000651696
AT5G14570	419.59	0.425301	0.117286	3.62618	0.000287646	0.00293678
AT2G30424	156.382	0.425172	0.16119	2.6377	0.00834706	0.0454616
AT5G66005	155.417	0.425112	0.14004	3.03564	0.00240026	0.016728
AT5G03470	387.267	0.424726	0.105636	4.02064	5.80402e-05	0.0007429
AT5G15160	113.136	0.424073	0.161178	2.63108	0.00851141	0.0461877
AT3G02830	1345.81	0.42352	0.106671	3.97034	7.17707e-05	0.000891806
AT3G55130	642.848	0.423058	0.134705	3.14062	0.00168592	0.0125558
AT4G11330	279.885	0.423054	0.107103	3.94998	7.8157e-05	0.000956333
AT1G73990	1408.4	0.423012	0.0606483	6.97484	3.06215e-12	1.65738e-10
AT1G65800	539.379	0.422933	0.141083	2.99776	0.00271969	0.0185145
AT3G45240	526.756	0.422784	0.0920737	4.5918	4.39448e-06	7.59833e-05
AT3G45930	568.288	0.422724	0.109282	3.86818	0.000109651	0.00128727
AT4G04840	1334.81	0.422285	0.0941237	4.48649	7.24051e-06	0.000118243
AT5G04900	725.918	0.42226	0.0838964	5.03312	4.82569e-07	1.06636e-05
AT1G79610	257.536	0.4221	0.107792	3.91589	9.00712e-05	0.00108054
AT1G71180	181.064	0.422014	0.12384	3.40774	0.000655021	0.00583055
AT1G31230	1634.3	0.42189	0.0884421	4.77024	1.84005e-06	3.56017e-05
AT1G55260	969.661	0.421495	0.105571	3.99254	6.53682e-05	0.000824043
AT1G11860	23636.6	0.421345	0.0799716	5.26868	1.37408e-07	3.44149e-06
AT5G39940	275.607	0.421052	0.11045	3.81214	0.000137767	0.00155514
AT3G45310	454.396	0.420033	0.11152	3.76644	0.000165589	0.00183442
AT1G68010	15986.9	0.41999	0.114417	3.67071	0.000241876	0.00253787
AT2G20340	296.03	0.419937	0.102647	4.09106	4.29405e-05	0.000570659
AT4G30530	2423.85	0.419521	0.0804828	5.21256	1.8625e-07	4.461e-06
AT3G05625	386.957	0.419156	0.0950838	4.40828	1.04196e-05	0.000163251
AT5G22500	248.047	0.419054	0.12221	3.42896	0.000605909	0.00547288
AT1G68260	313.207	0.41902	0.105523	3.97089	7.16061e-05	0.000890291
AT4G21820	176.381	0.418857	0.135305	3.09565	0.00196379	0.01418
AT2G32430	120.329	0.418642	0.152879	2.73838	0.00617429	0.0357786
AT1G70810	290.894	0.418416	0.108396	3.86007	0.000113356	0.00131888
AT1G59720	124.414	0.418391	0.140767	2.97222	0.00295658	0.0197655
AT5G59970	771.962	0.41701	0.0912782	4.56856	4.91085e-06	8.39478e-05
AT3G14660	2243.56	0.416928	0.0699145	5.9634	2.47035e-09	8.78451e-08
AT4G34540	136.182	0.416815	0.141564	2.94436	0.00323623	0.0212801
AT1G20650	711.314	0.416746	0.127506	3.26843	0.00108145	0.00873801
AT1G80190	172.449	0.416084	0.123847	3.35967	0.000780368	0.00673346
AT5G17310	975.249	0.415957	0.12492	3.32978	0.000869144	0.00733842
AT3G30300	976.407	0.41564	0.068648	6.05466	1.40715e-09	5.28326e-08
AT4G26530	9712.81	0.41525	0.133273	3.11578	0.00183457	0.0134277
AT2G27970	345.088	0.414538	0.119934	3.4564	0.000547442	0.00501433
AT5G65840	886.44	0.414258	0.130821	3.16661	0.00154226	0.0117205
AT2G36390	1344.72	0.414091	0.0882484	4.69234	2.70097e-06	4.98519e-05
AT2G38400	574.469	0.413502	0.131428	3.14622	0.00165394	0.0123673
AT2G42080	166.354	0.41337	0.136945	3.01851	0.0025402	0.017539
AT5G11550	533.376	0.412969	0.0757025	5.45516	4.89294e-08	1.33629e-06
AT5G59690	3057.09	0.41291	0.0637019	6.4819	9.05733e-11	4.02424e-09
AT5G48880	878.922	0.412855	0.0897143	4.60188	4.18688e-06	7.27659e-05
AT4G09350	413.318	0.412613	0.130158	3.1701	0.00152388	0.0116105
AT5G47900	268.365	0.412349	0.129091	3.19426	0.00140189	0.0108476
AT3G14690	1465.76	0.412318	0.0877694	4.69774	2.6306e-06	4.88125e-05
AT1G73920	1589.19	0.411612	0.0719368	5.72185	1.0537e-08	3.34202e-07
AT5G14660	1201.61	0.411285	0.0702899	5.85126	4.87855e-09	1.653e-07
AT5G67030	9712.66	0.41087	0.09862	4.16619	3.0973e-05	0.000427891
AT3G06790	343.478	0.410698	0.117948	3.48203	0.000497619	0.0046354
AT2G02500	635.557	0.410446	0.0867485	4.73145	2.22924e-06	4.21533e-05
AT2G29310	1048.15	0.410022	0.126577	3.23929	0.00119826	0.00950487
AT5G13060	145.966	0.409963	0.140533	2.9172	0.00353188	0.0228492
AT5G08130	1155.16	0.409617	0.0572825	7.15082	8.62593e-13	5.00689e-11
AT4G01580	161.88	0.409222	0.139705	2.92918	0.00339859	0.0221381
AT5G53970	515.945	0.408491	0.117228	3.48459	0.00049289	0.00459623
AT3G01660	154.825	0.408232	0.141824	2.87843	0.00399657	0.0252574
AT2G02980	111.915	0.408097	0.155086	2.63142	0.00850282	0.0461531
AT5G38865	163.703	0.408035	0.132834	3.07177	0.00212794	0.0151624
AT4G28310	112.989	0.407957	0.15511	2.63012	0.00853556	0.0462585
AT4G28730	313.223	0.407887	0.102618	3.97482	7.04338e-05	0.000878336
AT3G23070	1229.5	0.407546	0.095811	4.25364	2.10319e-05	0.000304772
AT3G43540	1075.32	0.407516	0.096435	4.22581	2.38079e-05	0.000341095
AT1G09340	21611	0.407418	0.0946035	4.30659	1.65794e-05	0.000247125
AT3G53470	696.62	0.407054	0.108665	3.74597	0.0001797	0.00197187
AT1G79270	543.314	0.407037	0.143782	2.83094	0.00464114	0.0284795
AT3G17160	715.046	0.406222	0.0894152	4.5431	5.5433e-06	9.35314e-05
AT1G58360	910.911	0.405786	0.077322	5.248	1.53759e-07	3.78726e-06
AT3G51000	452.3	0.405744	0.0947694	4.28138	1.85735e-05	0.00027333
AT2G23120	2782.27	0.405546	0.0867699	4.67382	2.95655e-06	5.36426e-05
AT5G15950	483.351	0.40519	0.129219	3.13568	0.00171458	0.0127238
AT3G15030	710.954	0.405109	0.106724	3.79584	0.000147142	0.0016467
AT5G37790	250.109	0.405078	0.103211	3.92475	8.68216e-05	0.0010482
AT4G28250	1693.33	0.404872	0.0942945	4.2937	1.75722e-05	0.000260249
AT4G31850	1110.2	0.404786	0.0744444	5.43743	5.40536e-08	1.46663e-06
AT5G14590	785.157	0.404674	0.0757578	5.34168	9.20896e-08	2.37202e-06
AT5G23420	422.227	0.403997	0.101941	3.96304	7.4001e-05	0.000912985
AT4G31560	663.444	0.4039	0.0988622	4.08548	4.39859e-05	0.000581954
AT3G15354	885.669	0.403806	0.114527	3.52585	0.000422124	0.0040573
AT1G23310	32735.6	0.403054	0.0971409	4.14916	3.33694e-05	0.000458372
AT3G16250	492.714	0.402775	0.0971032	4.14791	3.35525e-05	0.000460281
AT1G64970	445.816	0.402567	0.12674	3.17632	0.00149158	0.0114192
AT4G27700	3530.13	0.402566	0.070387	5.71933	1.06944e-08	3.37142e-07
AT2G21860	957.837	0.401947	0.0817412	4.91732	8.77376e-07	1.80838e-05
AT5G45590	163.139	0.401644	0.144006	2.78908	0.00528586	0.0314166
AT1G03600	9657.86	0.401551	0.0703868	5.70492	1.164e-08	3.62562e-07
AT5G21100	1258.39	0.401133	0.127048	3.15733	0.0015922	0.0120211
AT5G02790	2882.1	0.400772	0.096528	4.15187	3.29763e-05	0.000453571
AT5G63920	281.014	0.400593	0.127252	3.14803	0.00164373	0.0123164
AT5G10080	112.002	0.400432	0.148507	2.69639	0.0070096	0.0395629
AT3G48425	167.297	0.400258	0.136129	2.94028	0.00327915	0.0215216
AT4G01900	719.747	0.40015	0.0863365	4.63477	3.57337e-06	6.35341e-05
AT2G24200	3580.64	0.399761	0.0688466	5.80655	6.3774e-09	2.10606e-07
AT1G49010	548.283	0.399744	0.0791516	5.05036	4.40976e-07	9.89135e-06
AT1G16880	4836.97	0.399743	0.0858058	4.65869	3.18224e-06	5.73628e-05
AT5G43850	1289.65	0.399277	0.107952	3.69866	0.000216744	0.00231142
AT1G73470	677.311	0.398549	0.0853375	4.67027	3.00801e-06	5.45052e-05
AT5G42740	1306.18	0.39807	0.0606043	6.56835	5.08754e-11	2.34545e-09
AT1G49740	423.212	0.397104	0.0923489	4.30004	1.70765e-05	0.0002539
AT1G50260	293.97	0.396755	0.104574	3.79401	0.000148231	0.001658
AT3G16990	157.161	0.396518	0.136812	2.89827	0.00375226	0.0239259
AT5G15530	489.543	0.39634	0.112013	3.53833	0.000402659	0.00390443
AT4G02110	252.669	0.396256	0.114985	3.44615	0.000568626	0.00517877
AT5G65890	272.056	0.39615	0.129992	3.04749	0.00230758	0.0161958
AT3G24760	134.962	0.396063	0.133133	2.97494	0.00293045	0.0196224
AT3G01180	1279.25	0.395042	0.105009	3.762	0.000168562	0.00186438
AT3G25740	191.64	0.394394	0.123643	3.18978	0.00142381	0.0109724
AT1G77320	155.802	0.393733	0.124023	3.17469	0.00149997	0.0114618
AT3G53370	160.746	0.393477	0.125309	3.14006	0.00168914	0.0125753
AT5G06580	512.275	0.392556	0.0858999	4.56993	4.87893e-06	8.35391e-05
AT3G46320	592.412	0.391964	0.09983	3.92631	8.62582e-05	0.0010426
AT3G48200	2011.18	0.391891	0.0981051	3.9946	6.48038e-05	0.000818414
AT3G05600	230.935	0.391766	0.120163	3.26028	0.00111301	0.00895476
AT3G44020	323.757	0.391169	0.125055	3.12797	0.00176017	0.0129973
AT5G63000	281.991	0.390165	0.125713	3.10361	0.00191176	0.0138516
AT5G18700	371.402	0.389949	0.0990427	3.93718	8.24455e-05	0.00100292
AT2G15970	2578.03	0.389656	0.100956	3.85967	0.000113538	0.00132026
AT1G09910	255.947	0.389614	0.11353	3.43183	0.000599521	0.00541987
AT5G67280	651.21	0.389356	0.100208	3.88548	0.000102129	0.00120918
AT4G27860	289.464	0.389343	0.106967	3.63984	0.000272803	0.00280917
AT1G32540	488.507	0.389278	0.11209	3.47291	0.000514848	0.00477454
AT3G62700	2426	0.387903	0.0604752	6.41425	1.41521e-10	6.15661e-09
AT3G26710	2175.09	0.387462	0.0738054	5.24978	1.5228e-07	3.76309e-06
AT5G65380	1779.58	0.387074	0.0760396	5.09043	3.57254e-07	8.18973e-06
AT3G54560	773.989	0.387052	0.0769631	5.02906	4.92888e-07	1.08571e-05
AT3G18110	849.35	0.387013	0.0635467	6.09022	1.12758e-09	4.32716e-08
AT4G33030	1230.81	0.386852	0.0773774	4.99955	5.74644e-07	1.24604e-05
AT2G17780	274.651	0.385085	0.142024	2.71141	0.00669987	0.0381453
AT5G44000	490.192	0.384846	0.116674	3.29847	0.00097213	0.00800682
AT4G36390	1650.11	0.384713	0.0728003	5.2845	1.26052e-07	3.16904e-06
AT3G54660	4456.67	0.384531	0.0661278	5.81497	6.06443e-09	2.01227e-07
AT5G51970	2573.04	0.384297	0.0760412	5.0538	4.33111e-07	9.75693e-06
AT5G02890	319.911	0.384261	0.144935	2.65126	0.00801927	0.044083
AT4G36910	240.379	0.384245	0.124882	3.07687	0.00209187	0.014959
AT2G17320	399.661	0.383719	0.0957827	4.00614	6.17197e-05	0.000785321
AT1G10930	538.759	0.383678	0.0913462	4.20026	2.66606e-05	0.000374867
AT2G01120	170.354	0.383534	0.137671	2.78589	0.00533815	0.0316822
AT5G58260	1101.17	0.383354	0.104919	3.65382	0.000258371	0.00268124
AT5G62200	226.234	0.383118	0.125333	3.05679	0.00223724	0.0157552
AT5G63100	184.814	0.382984	0.118157	3.2413	0.00118985	0.00945255
AT5G08050	3726.39	0.382506	0.0722482	5.29434	1.19448e-07	3.03175e-06
AT1G60200	2096.35	0.382337	0.0691872	5.52612	3.27385e-08	9.30702e-07
AT2G04039	848.701	0.382046	0.114734	3.32984	0.000868949	0.00733842
AT1G32470	7668.85	0.381978	0.0892614	4.27932	1.87467e-05	0.000275684
AT3G26290	1065.86	0.381842	0.0773148	4.9388	7.86049e-07	1.63797e-05
AT2G46915	752.412	0.381798	0.103775	3.67907	0.000234082	0.00246586
AT2G43100	1818.52	0.381503	0.0918492	4.15358	3.27313e-05	0.000450498
AT5G50340	318.15	0.381502	0.108136	3.528	0.000418713	0.00403381
AT1G10700	449.753	0.381011	0.102823	3.70549	0.000210984	0.00225577
AT1G60600	874.835	0.380993	0.0885576	4.30221	1.69106e-05	0.000251702
AT1G68130	207.927	0.380871	0.136819	2.78375	0.00537348	0.0318375
AT5G01260	232.094	0.38081	0.122538	3.10768	0.00188563	0.0136956
AT1G72810	402.85	0.380744	0.100059	3.80519	0.000141696	0.00159517
AT1G10600	318.222	0.377947	0.0988397	3.82384	0.00013139	0.00149449
AT1G21930	220.757	0.377928	0.117414	3.21876	0.00128746	0.0100971
AT1G60140	895.945	0.377731	0.104277	3.62239	0.000291897	0.00296855
AT3G63520	4090.68	0.377685	0.06811	5.54521	2.93595e-08	8.41532e-07
AT4G24450	290.18	0.377094	0.130207	2.89611	0.00377825	0.02404
AT5G53050	294.21	0.376851	0.102972	3.65974	0.000252467	0.00263675
AT4G00370	1606.7	0.376811	0.0781287	4.82296	1.41442e-06	2.79637e-05
AT2G39010	5506.49	0.376572	0.0926042	4.06647	4.77307e-05	0.000625542
AT4G38580	312.232	0.376445	0.106745	3.52657	0.000420983	0.00405007
AT1G18060	2149.04	0.376321	0.0942384	3.99329	6.51629e-05	0.000821952
AT2G25830	964.876	0.376033	0.089613	4.19618	2.71452e-05	0.000380033
AT3G08030	1814	0.375927	0.0533049	7.0524	1.75857e-12	9.87736e-11
AT1G19920	1588.17	0.375917	0.0749481	5.0157	5.28413e-07	1.16151e-05
AT5G10910	521.81	0.375798	0.0982656	3.82431	0.00013114	0.00149246
AT4G17340	2010.19	0.375671	0.107412	3.49748	0.000469668	0.00442448
AT5G23310	946.857	0.375532	0.111028	3.38232	0.000718762	0.0062985
AT3G18440	349.124	0.37553	0.0987801	3.80168	0.00014372	0.0016136
AT1G78770	161.903	0.375501	0.14316	2.62295	0.00871719	0.0470593
AT2G04790	210.12	0.375451	0.141254	2.65799	0.00786083	0.0434493
AT5G50100	509.515	0.37413	0.116652	3.20723	0.00134019	0.0104478
AT1G13360	743.259	0.373971	0.102996	3.63091	0.00028242	0.00289051
AT5G09660	17505.2	0.373848	0.124421	3.00471	0.00265837	0.0181922
AT2G22190	343.294	0.373551	0.107922	3.4613	0.000537567	0.00494125
AT3G15790	558.906	0.372972	0.0919223	4.05747	4.96074e-05	0.000645267
AT5G51750	916.478	0.372705	0.109159	3.41433	0.000639397	0.00571355
AT5G14200	4557.39	0.372402	0.0836772	4.45046	8.56868e-06	0.000137582
AT2G37470	891.204	0.372037	0.0655925	5.67194	1.41185e-08	4.31382e-07
AT1G42470	830.526	0.372033	0.0704053	5.28417	1.26275e-07	3.17025e-06
AT5G23570	333.136	0.370914	0.104798	3.53934	0.000401126	0.00389137
AT1G63940	2714.42	0.370693	0.0637464	5.81512	6.059e-09	2.01227e-07
AT1G03030	263.598	0.369892	0.113592	3.25632	0.00112866	0.00905272
AT5G55000	217.069	0.369891	0.111272	3.32421	0.000886689	0.00744133
AT2G44310	554.48	0.36976	0.0823529	4.48995	7.12413e-06	0.0001166
AT5G44720	977.06	0.369716	0.0899472	4.11037	3.95022e-05	0.000530378
AT5G06130	1043.93	0.369662	0.0818347	4.51718	6.26691e-06	0.000104056
AT3G13810	301.511	0.369516	0.118745	3.11185	0.0018592	0.0135604
AT4G36190	880.855	0.36902	0.087432	4.22065	2.43601e-05	0.000347682
AT5G20720	8331.64	0.368897	0.0806671	4.57308	4.80603e-06	8.24943e-05
AT5G24314	1738.39	0.368572	0.0825969	4.4623	8.10855e-06	0.000131185
AT5G44730	225.94	0.368312	0.129263	2.84931	0.00438135	0.0272533
AT1G78820	749.954	0.368238	0.113693	3.23888	0.00120001	0.00951512
AT3G52180	798.465	0.368164	0.0906348	4.06206	4.8641e-05	0.000636672
AT1G75270	386.22	0.367221	0.141102	2.60252	0.00925426	0.0494209
AT5G47040	3372.72	0.367057	0.0706387	5.19625	2.03343e-07	4.85369e-06
AT1G79550	4356.37	0.36704	0.0761392	4.82064	1.43095e-06	2.82637e-05
AT5G51200	1467.65	0.366824	0.0605187	6.06132	1.35007e-09	5.07811e-08
AT5G17990	1096.37	0.366224	0.0655994	5.58274	2.36755e-08	6.90967e-07
AT2G24230	225.875	0.365958	0.109347	3.34676	0.00081763	0.00697697
AT4G08170	230.969	0.365749	0.116407	3.14198	0.00167807	0.0125198
AT5G35630	41989.8	0.365572	0.0791379	4.61943	3.84794e-06	6.78517e-05
AT1G23190	1432.3	0.365406	0.0800062	4.56722	4.94232e-06	8.44165e-05
AT1G69295	611.77	0.365068	0.088408	4.12936	3.63775e-05	0.000494155
AT1G06550	781.824	0.364654	0.0855274	4.26359	2.01168e-05	0.000293348
AT4G13770	5036.55	0.364439	0.0926981	3.93146	8.44308e-05	0.0010223
AT5G06060	1010.33	0.364159	0.0774203	4.70367	2.5553e-06	4.74998e-05
AT2G41310	448.244	0.363777	0.109471	3.32304	0.000890426	0.0074685
AT1G28150	633.819	0.36364	0.0890684	4.0827	4.45151e-05	0.000587093
AT5G63930	341.237	0.363628	0.110022	3.30505	0.000949601	0.00785542
AT5G02280	193.046	0.36353	0.122721	2.96225	0.00305402	0.0203127
AT3G51140	1359.76	0.362983	0.0685848	5.29247	1.20675e-07	3.05914e-06
AT2G35780	1085.36	0.362511	0.0704323	5.14694	2.64775e-07	6.19236e-06
AT3G01210	228.659	0.362013	0.138102	2.62134	0.00875839	0.0472257
AT5G14260	4243.48	0.361823	0.0806512	4.48627	7.24813e-06	0.000118275
AT1G51760	432.581	0.361298	0.129424	2.79158	0.00524507	0.0312274
AT4G20150	1651.9	0.361049	0.0602833	5.9892	2.10872e-09	7.57611e-08
AT1G78140	799.665	0.35995	0.0845949	4.25499	2.09061e-05	0.000303583
AT3G49260	1175.99	0.359581	0.0674939	5.3276	9.95187e-08	2.54763e-06
AT3G23325	184.971	0.358802	0.126317	2.8405	0.0045043	0.027827
AT1G80030	1679.07	0.35874	0.0737358	4.86521	1.14337e-06	2.31541e-05
AT5G24000	268.802	0.358608	0.112901	3.1763	0.00149165	0.0114192
AT3G44670	1421.68	0.358038	0.0594796	6.01951	1.74944e-09	6.42943e-08
AT1G59620	252.17	0.357842	0.127489	2.80685	0.00500292	0.0301477
AT5G07690	665.227	0.357611	0.0946904	3.77664	0.00015896	0.00176756
AT1G10900	984.284	0.356899	0.0733879	4.86319	1.1551e-06	2.3369e-05
AT3G23570	804.06	0.356587	0.0984451	3.62219	0.00029212	0.00296937
AT3G05880	1014.06	0.356151	0.124509	2.86044	0.00423048	0.0265047
AT5G25460	4896.03	0.356097	0.0978437	3.63945	0.000273219	0.00281153
AT4G08900	336.598	0.355845	0.107377	3.31397	0.000919799	0.00766365
AT4G37000	924.313	0.355016	0.0947368	3.7474	0.000178679	0.00196171
AT1G28410	229.544	0.354441	0.114919	3.08427	0.00204052	0.0146571
AT2G36120	2353.64	0.35415	0.071542	4.95024	7.41215e-07	1.55857e-05
AT2G44230	675.952	0.353837	0.127752	2.76972	0.00561039	0.0330626
AT4G03200	865.821	0.353645	0.0787357	4.49155	7.07066e-06	0.000115923
AT2G35810	280.814	0.353392	0.12963	2.72615	0.00640776	0.0367634
AT5G08740	816.238	0.353318	0.0710797	4.97073	6.67026e-07	1.42413e-05
AT3G09560	452.241	0.352526	0.0974592	3.61717	0.000297845	0.00301726
AT5G53580	999.273	0.352302	0.101698	3.46421	0.000531792	0.00490548
AT3G60210	668.343	0.35048	0.095895	3.65484	0.000257346	0.00267594
AT5G41960	223.34	0.350377	0.112732	3.10805	0.00188325	0.0136914
AT1G32550	904.083	0.350035	0.0942792	3.71275	0.000205019	0.00219762
AT1G13820	1238.47	0.349451	0.0772277	4.52494	6.04113e-06	0.000100869
AT5G10400	1029.79	0.348367	0.0659025	5.2861	1.24949e-07	3.14836e-06
AT4G15620	359.805	0.348055	0.128711	2.70417	0.00684753	0.0388269
AT2G47060	442.412	0.347905	0.105646	3.29313	0.00099077	0.00814746
AT2G22970	350.556	0.347673	0.111669	3.11343	0.00184927	0.0135033
AT5G52110	214.245	0.347573	0.118864	2.92413	0.00345417	0.0224231
AT4G23940	1392.56	0.347539	0.077197	4.50197	6.73256e-06	0.000110991
AT5G66720	929.214	0.34745	0.0748776	4.64023	3.48016e-06	6.23021e-05
AT1G04990	231.795	0.347379	0.122455	2.83679	0.00455691	0.0281021
AT5G45020	181.772	0.34667	0.130345	2.65963	0.00782258	0.0433068
AT1G69935	403.928	0.346319	0.0898213	3.85564	0.000115428	0.0013385
AT5G23940	1764.88	0.346029	0.101603	3.4057	0.000659946	0.00586687
AT3G44880	1069.5	0.345865	0.0972755	3.55552	0.00037723	0.00370265
AT3G22150	741.095	0.345602	0.0698817	4.94553	7.59362e-07	1.59351e-05
AT3G24495	215.876	0.345457	0.114519	3.01658	0.00255645	0.017612
AT3G20820	1988.84	0.345255	0.121264	2.84713	0.00441156	0.0273896
AT2G29390	419.821	0.345231	0.102387	3.37182	0.000746729	0.00649701
AT2G35130	500.551	0.344956	0.0996516	3.46162	0.000536931	0.00493976
AT5G24165	1888.75	0.344833	0.0631358	5.46177	4.71422e-08	1.29257e-06
AT1G67440	351.868	0.344411	0.0942982	3.65236	0.00025984	0.00269381
AT1G64355	920.889	0.34439	0.0834589	4.12647	3.68381e-05	0.000500086
AT1G33170	855.334	0.344246	0.0737569	4.66731	3.05169e-06	5.52485e-05
AT3G46590	1417.69	0.344165	0.0927809	3.70944	0.000207716	0.00222539
AT1G04710	432.671	0.344065	0.0930205	3.69881	0.000216611	0.00231118
AT1G72190	165.97	0.343846	0.120099	2.86302	0.0041963	0.0263223
AT1G12800	6504.15	0.343754	0.0633247	5.42844	5.68501e-08	1.5365e-06
AT5G62720	2398.88	0.343676	0.085845	4.00345	6.24262e-05	0.000793193
AT4G17740	791.597	0.343528	0.085059	4.03871	5.3747e-05	0.00069222
AT5G23920	652.133	0.343452	0.108499	3.16548	0.00154828	0.0117534
AT5G45610	218.567	0.343232	0.12647	2.71395	0.00664866	0.0379367
AT4G28025	1488.71	0.343079	0.0975286	3.51773	0.000435262	0.00415864
AT1G35720	2699.27	0.343006	0.124452	2.75613	0.00584892	0.0342167
AT3G59300	551.05	0.342876	0.111229	3.0826	0.00205199	0.0147345
AT5G26570	1526.08	0.341866	0.0804097	4.25155	2.12294e-05	0.000306995
AT1G73750	606.355	0.341846	0.126405	2.70437	0.00684343	0.0388142
AT4G22970	186.595	0.341709	0.121888	2.80347	0.00505559	0.0303948
AT5G08415	662.618	0.341204	0.0735442	4.63944	3.49358e-06	6.24175e-05
AT1G05360	283.472	0.34098	0.0998876	3.41364	0.000641015	0.00572054
AT3G28050	1113.91	0.339809	0.0660062	5.14814	2.63078e-07	6.15958e-06
AT5G08710	296.434	0.339805	0.0951148	3.57257	0.000353492	0.00349434
AT4G01883	653.143	0.339679	0.103119	3.29406	0.000987512	0.00812708
AT4G38220	1248.95	0.339143	0.0687333	4.93419	8.04827e-07	1.67208e-05
AT1G58080	2680.24	0.339037	0.0683098	4.96322	6.9334e-07	1.47126e-05
AT3G04870	2331.67	0.338963	0.0802865	4.22192	2.42229e-05	0.000346435
AT1G04410	11201.4	0.338883	0.0478622	7.08038	1.43755e-12	8.0961e-11
AT2G33040	4280.85	0.338856	0.0526127	6.44057	1.19024e-10	5.21055e-09
AT5G46800	1833.87	0.338567	0.116681	2.90164	0.00371216	0.023742
AT1G07480	237.015	0.338439	0.120996	2.7971	0.00515641	0.0308721
AT5G51960	310.248	0.338184	0.101599	3.3286	0.000872837	0.00735768
AT3G63540	5019.62	0.337774	0.106854	3.16108	0.00157186	0.0119064
AT1G16170	287.14	0.337713	0.107435	3.14341	0.00166989	0.0124677
AT5G02515	205.956	0.337097	0.116806	2.88596	0.00390216	0.0247228
AT5G64250	613.017	0.33698	0.0766316	4.39741	1.09552e-05	0.000170744
AT3G55440	8414.7	0.336559	0.0621104	5.41873	6.00255e-08	1.61187e-06
AT1G75710	339.197	0.33613	0.100143	3.3565	0.000789356	0.00678668
AT2G36490	1181.58	0.335743	0.0756772	4.43652	9.14265e-06	0.000145876
AT2G32880	752.336	0.335488	0.113637	2.95229	0.0031543	0.0208731
AT3G25570	311.574	0.335477	0.113497	2.95582	0.00311837	0.0206813
AT5G42270	11986.2	0.335343	0.0758474	4.42129	9.81134e-06	0.000154728
AT3G24170	2496.33	0.335292	0.0887407	3.77834	0.00015788	0.00175649
AT5G02620	393.299	0.334923	0.0996945	3.3595	0.000780842	0.00673405
AT5G03430	727.057	0.334482	0.0714686	4.68012	2.86701e-06	5.23601e-05
AT5G56210	355.814	0.334397	0.107593	3.10798	0.00188374	0.0136914
AT4G19710	1674.4	0.334386	0.0775721	4.31065	1.62778e-05	0.000243152
AT3G53570	386.312	0.333988	0.110818	3.01385	0.00257955	0.0177518
AT3G44310	10848.7	0.333951	0.104537	3.19456	0.00140042	0.0108476
AT5G64260	1616.93	0.333932	0.109223	3.05733	0.00223318	0.0157354
AT1G51650	2188.73	0.333746	0.0575026	5.80402	6.47417e-09	2.13126e-07
AT3G26310	287.472	0.333675	0.114498	2.91424	0.00356551	0.0230168
AT5G11270	766.958	0.333148	0.0782277	4.2587	2.05618e-05	0.000299
AT5G14740	24422.6	0.332926	0.0790518	4.21149	2.53691e-05	0.000359865
AT4G12320	938.22	0.332754	0.109218	3.04669	0.00231377	0.0162283
AT4G28030	1367.59	0.332623	0.0848678	3.9193	8.88054e-05	0.00106905
AT5G44510	597.784	0.332578	0.073335	4.53505	5.75891e-06	9.66996e-05
AT4G01940	398.582	0.332495	0.127834	2.60099	0.00929556	0.0495906
AT5G04820	194.488	0.33238	0.114834	2.89444	0.00379836	0.0241459
AT5G48900	762.259	0.332322	0.112824	2.94549	0.00322444	0.0212226
AT5G20380	710.098	0.332147	0.0967416	3.43335	0.000596182	0.00539203
AT5G04140	28771.3	0.332078	0.0867497	3.828	0.00012919	0.00147426
AT1G16020	324.607	0.331867	0.10425	3.18338	0.00145566	0.0111807
AT5G19440	866.305	0.331733	0.0975927	3.39915	0.000675951	0.0059788
AT1G66130	792.041	0.330399	0.10229	3.23002	0.00123782	0.00976952
AT3G49000	268.366	0.330288	0.11677	2.82853	0.0046762	0.0286259
AT1G13930	10678.6	0.329939	0.117566	2.80642	0.00500959	0.0301792
AT4G37830	2277.71	0.32982	0.0700028	4.71153	2.45868e-06	4.59316e-05
AT1G14700	820.174	0.329053	0.103425	3.18157	0.00146479	0.0112342
AT3G47250	1478.61	0.3287	0.0650512	5.05294	4.35065e-07	9.7798e-06
AT2G18170	208.24	0.32859	0.112498	2.92086	0.00349072	0.022618
AT5G09760	477.294	0.328321	0.0840028	3.90845	9.28897e-05	0.00111071
AT3G18080	4860.6	0.328283	0.089479	3.66883	0.000243667	0.00255281
AT1G69800	266.604	0.328026	0.111117	2.95207	0.00315654	0.0208813
AT3G04630	719.66	0.32788	0.0862679	3.80071	0.000144281	0.00161815
AT5G01650	937.529	0.32787	0.0915054	3.58307	0.000339578	0.00337279
AT1G77090	1192.65	0.327857	0.0751142	4.36478	1.27248e-05	0.000194827
AT1G64140	1415.92	0.327817	0.0700042	4.68282	2.82959e-06	5.17674e-05
AT3G06310	431.276	0.327409	0.0837705	3.90841	9.2906e-05	0.00111071
AT3G44100	550.454	0.32679	0.0931647	3.50766	0.000452074	0.00428758
AT3G59140	381.036	0.326724	0.116777	2.79783	0.00514464	0.0308146
AT5G46400	285.387	0.326302	0.10649	3.06415	0.0021829	0.015461
AT3G10670	1270.37	0.326239	0.0773184	4.21943	2.44925e-05	0.000349093
AT1G05120	405.164	0.326043	0.0994437	3.27867	0.00104299	0.00847858
AT5G09600	251.094	0.325986	0.117235	2.78062	0.0054255	0.032091
AT4G34900	640.237	0.325974	0.115963	2.81101	0.00493856	0.0298561
AT3G01500	62468.3	0.325746	0.0844975	3.8551	0.000115683	0.0013402
AT1G62750	11909.1	0.324817	0.0794672	4.08743	4.36172e-05	0.000577637
AT5G47050	250.061	0.324724	0.114817	2.82819	0.00468123	0.0286483
AT1G09390	270.452	0.324717	0.113553	2.8596	0.00424181	0.0265518
AT1G71695	2310.17	0.324479	0.0655324	4.95144	7.36681e-07	1.55217e-05
AT2G30320	364.394	0.324355	0.0983222	3.2989	0.000970631	0.00799763
AT2G18230	279.034	0.324345	0.119209	2.72081	0.00651229	0.0372606
AT3G05500	463.764	0.324342	0.087809	3.69372	0.000220994	0.00234952
AT1G26160	452.889	0.324177	0.0845541	3.83395	0.000126101	0.00144458
AT4G26080	818.586	0.32408	0.102662	3.15676	0.00159534	0.0120404
AT5G61670	1473.09	0.324012	0.0777909	4.16516	3.1113e-05	0.000429359
AT5G64460	1197.64	0.323885	0.0932163	3.47455	0.00051171	0.00474895
AT5G03650	2570.99	0.323188	0.0841702	3.8397	0.000123186	0.00141535
AT1G09490	549.539	0.322825	0.102967	3.13523	0.00171718	0.0127295
AT3G53730	1344.23	0.322492	0.0889138	3.62701	0.000286717	0.00293089
AT5G14220	759.547	0.322432	0.0805061	4.00506	6.2002e-05	0.000788284
AT1G65980	2075.19	0.3219	0.0604902	5.32152	1.02902e-07	2.631e-06
AT4G22890	8698.22	0.321701	0.0964918	3.33397	0.000856168	0.00725531
AT4G24540	353.412	0.321417	0.122071	2.63303	0.00846274	0.0459595
AT5G17790	442.934	0.320952	0.0824867	3.89096	9.98484e-05	0.00118555
AT1G31160	492.937	0.320778	0.0899697	3.5654	0.000363302	0.00357773
AT1G67300	417.468	0.320681	0.0929501	3.45004	0.000560514	0.00511607
AT1G65370	704.424	0.320617	0.0807945	3.9683	7.23873e-05	0.000897861
AT3G02690	1101.33	0.320488	0.0939498	3.41126	0.000646626	0.00576321
AT1G31600	483.787	0.320298	0.119592	2.67825	0.00740073	0.0413893
AT5G42650	3031.71	0.320227	0.100637	3.182	0.0014626	0.0112243
AT2G32640	769.1	0.32022	0.0789202	4.05751	4.95982e-05	0.000645267
AT2G46790	504.902	0.319643	0.117054	2.73074	0.00631921	0.0364544
AT5G27270	538.329	0.319602	0.0867304	3.68501	0.000228695	0.00241906
AT1G68660	1351.6	0.319561	0.106718	2.99443	0.00274955	0.0186751
AT2G42770	1301.16	0.319311	0.0693191	4.6064	4.09701e-06	7.14423e-05
AT5G55740	493.539	0.319276	0.0898661	3.55279	0.000381164	0.00373072
AT4G40045	311.727	0.319226	0.116806	2.73296	0.00627675	0.0362715
AT3G50820	30476	0.319168	0.0987855	3.23092	0.00123394	0.00974338
AT3G08640	867.977	0.318687	0.0764924	4.16625	3.09653e-05	0.000427891
AT1G71240	350.879	0.318517	0.102164	3.11772	0.00182257	0.0133493
AT4G37110	323.031	0.318049	0.100712	3.15799	0.00158859	0.0120025
AT5G40850	2084.89	0.317994	0.102287	3.10885	0.00187816	0.0136652
AT5G58800	407.687	0.31794	0.0930575	3.4166	0.000634084	0.00568012
AT3G53830	447.236	0.31772	0.0903466	3.51668	0.000436979	0.00416827
AT1G32100	329.285	0.317614	0.100037	3.17498	0.00149847	0.0114546
AT4G29590	671.431	0.317496	0.0880639	3.6053	0.000311797	0.00314331
AT3G17930	1323.56	0.316842	0.0772108	4.1036	4.06768e-05	0.000545096
AT3G18490	4131.98	0.316684	0.106566	2.97173	0.00296126	0.0197905
AT5G19290	1000.11	0.316511	0.0794854	3.982	6.83389e-05	0.000855283
AT4G01915	192.16	0.316462	0.115284	2.74506	0.00605003	0.0351956
AT3G12490	863.586	0.316111	0.0825667	3.82855	0.000128898	0.00147177
AT4G11010	2458.62	0.316	0.0772967	4.08814	4.34853e-05	0.000576796
AT3G45300	644.626	0.315292	0.0887836	3.55124	0.000383425	0.00374757
AT1G72030	921.274	0.315236	0.0923602	3.41311	0.000642254	0.00572915
AT4G24930	1416.52	0.315168	0.0664808	4.74074	2.12938e-06	4.04485e-05
AT3G10920	2660.11	0.314596	0.0473743	6.64064	3.12322e-11	1.4927e-09
AT4G37040	1366.02	0.314315	0.0786419	3.99679	6.42073e-05	0.000812357
AT5G64170	1576.28	0.314295	0.0879791	3.57238	0.000353748	0.00349509
AT2G33855	500.687	0.314285	0.117367	2.6778	0.00741072	0.041434
AT5G62410	515.917	0.314026	0.104226	3.01293	0.00258735	0.0177997
AT2G24820	1021.29	0.314007	0.11938	2.63032	0.00853049	0.0462443
AT5G20130	861.643	0.314001	0.100043	3.13865	0.00169728	0.0126269
AT4G28220	478.071	0.31391	0.0910094	3.44921	0.000562229	0.00512723
AT3G45770	719.816	0.313854	0.0781309	4.01703	5.89373e-05	0.00075392
AT4G25910	609.507	0.313271	0.0980701	3.19436	0.00140142	0.0108476
AT1G03687	231.727	0.313242	0.113967	2.74853	0.0059863	0.034854
AT3G21110	468.848	0.313138	0.102313	3.06057	0.00220915	0.0156101
AT2G45270	505.053	0.312966	0.0856144	3.65553	0.000256653	0.00267191
AT5G06220	1519.48	0.312531	0.0802681	3.89359	9.87708e-05	0.00117409
AT1G47580	341.628	0.312523	0.111981	2.79086	0.0052568	0.0312707
AT3G08690	311.251	0.312479	0.0958881	3.25879	0.00111888	0.00898813
AT4G29030	1348.77	0.312207	0.0901174	3.46445	0.000531321	0.00490548
AT4G16765	227.287	0.3119	0.117046	2.66477	0.00770418	0.0427843
AT5G16140	338.073	0.311729	0.100877	3.09018	0.00200033	0.0144082
AT3G56040	1865.06	0.311708	0.0693048	4.49764	6.87105e-06	0.000113096
AT2G20860	2534.91	0.311693	0.0773821	4.02797	5.62602e-05	0.000722335
AT1G50640	502.453	0.31164	0.0956154	3.2593	0.00111687	0.00898234
AT3G63170	760.66	0.311372	0.083264	3.73957	0.000184335	0.00200584
AT4G26630	3854.6	0.311106	0.05475	5.6823	1.32897e-08	4.07251e-07
AT4G14770	399.03	0.310939	0.119232	2.60785	0.00911117	0.0487567
AT2G20290	390.977	0.310703	0.0947806	3.27813	0.00104498	0.00848943
AT4G38100	410.741	0.310505	0.0940542	3.30134	0.000962251	0.00794114
AT5G15780	1849.84	0.310306	0.0793201	3.91208	9.15063e-05	0.00109587
AT3G13180	900.175	0.310293	0.0943326	3.28936	0.00100417	0.00823165
AT5G63950	398.067	0.310255	0.0853476	3.6352	0.00027777	0.00284991
AT1G78915	594.488	0.310046	0.112877	2.74676	0.00601865	0.0350326
AT5G13030	1475.06	0.310032	0.0702498	4.41328	1.01817e-05	0.000160004
AT2G04940	343.047	0.309846	0.09863	3.1415	0.00168085	0.012527
AT1G77600	441.394	0.30975	0.0962396	3.21854	0.00128847	0.0100974
AT5G65990	456.95	0.309701	0.102812	3.0123	0.00259272	0.0178307
AT1G17140	659.354	0.309553	0.0810316	3.82015	0.000133372	0.00151291
AT2G31400	7002.39	0.30944	0.0520565	5.94431	2.77626e-09	9.7888e-08
AT4G38260	294.923	0.308733	0.102221	3.02023	0.00252579	0.0174569
AT2G37450	811.211	0.308628	0.100807	3.06158	0.00220169	0.015568
AT1G07110	2826.05	0.308548	0.0820006	3.76275	0.000168052	0.00185973
AT4G37270	1170.87	0.308282	0.0718845	4.28857	1.79827e-05	0.000265574
AT4G29430	269.811	0.307948	0.106341	2.89584	0.00378141	0.0240528
AT2G35830	965.612	0.307919	0.112135	2.74597	0.00603324	0.0351077
AT1G27480	672.111	0.307807	0.0805243	3.82254	0.000132084	0.00150075
AT1G73170	1082.92	0.307643	0.0731221	4.20725	2.58493e-05	0.000366023
AT2G34860	2908.51	0.307291	0.0689435	4.45715	8.30569e-06	0.000134166
AT5G42720	697.611	0.307147	0.08756	3.50784	0.000451756	0.00428674
AT5G04940	356.802	0.307049	0.10087	3.04402	0.00233443	0.0163512
AT4G33350	734.967	0.307011	0.0923124	3.32578	0.000881724	0.00740265
AT1G63770	4858.01	0.30655	0.0561481	5.45968	4.77005e-08	1.30615e-06
AT3G19100	655.183	0.306358	0.0995085	3.07872	0.00207894	0.0148912
AT5G40060	221.358	0.306286	0.114301	2.67965	0.00736989	0.04125
AT2G28740	989.222	0.306261	0.0970542	3.15557	0.00160186	0.0120809
AT3G12780	24125.2	0.306178	0.0797411	3.83965	0.00012321	0.00141535
AT5G19220	838.034	0.305922	0.11062	2.76552	0.00568316	0.0334158
AT4G00520	210.8	0.305744	0.110733	2.76108	0.00576098	0.0337876
AT1G67590	476.911	0.305001	0.107205	2.84503	0.00444074	0.0275323
AT4G22220	1595.68	0.30471	0.0693094	4.39638	1.10071e-05	0.000171424
AT4G30825	633.895	0.304675	0.0922686	3.30205	0.000959821	0.00792737
AT3G27340	280.696	0.304607	0.104978	2.90161	0.00371245	0.023742
AT1G13090	745.851	0.304559	0.100429	3.03257	0.00242478	0.0168819
AT5G01750	4894	0.304456	0.0756889	4.02247	5.75921e-05	0.000737618
AT4G17050	800.812	0.304166	0.0861113	3.53224	0.000412052	0.00398253
AT3G27820	2256.68	0.303967	0.0777329	3.9104	9.21427e-05	0.00110285
AT4G35250	3993.74	0.303528	0.0990246	3.06517	0.00217544	0.0154243
AT3G51130	473.155	0.302711	0.0972585	3.11243	0.00185551	0.013543
AT1G70480	451.664	0.302573	0.114984	2.63144	0.00850235	0.0461531
AT5G52780	634.683	0.302145	0.100857	2.99578	0.00273748	0.0186173
AT3G60750	33666.1	0.302144	0.0588927	5.13042	2.89093e-07	6.70838e-06
AT2G17265	623.575	0.301879	0.0789239	3.82493	0.000130809	0.0014895
AT1G07750	418.763	0.301736	0.102355	2.94792	0.00319916	0.0210844
AT1G79870	1056.2	0.301723	0.0660889	4.5654	4.98533e-06	8.50117e-05
AT3G04790	2440.61	0.30122	0.0833262	3.61495	0.000300402	0.00304021
AT1G49670	852.464	0.30117	0.065914	4.56913	4.89756e-06	8.37892e-05
AT2G21530	1429.34	0.301013	0.0845435	3.56046	0.000370211	0.00364233
AT4G37680	506.101	0.300847	0.101465	2.96504	0.00302643	0.0201592
AT2G33540	755.251	0.3007	0.0809532	3.71449	0.000203615	0.00218483
AT3G50685	1893.4	0.300639	0.0781865	3.84515	0.000120477	0.00138932
AT4G34240	1291	0.300629	0.080789	3.72116	0.000198308	0.00213668
AT1G10510	1315.74	0.300211	0.0732882	4.09631	4.19786e-05	0.000559303
AT1G19660	2963.8	0.29987	0.0795182	3.77109	0.000162536	0.00180348
AT2G18790	1540.1	0.298937	0.0936454	3.19222	0.00141182	0.0108921
AT1G76280	290.103	0.298699	0.113401	2.63402	0.00843807	0.0458614
AT4G37510	3052.77	0.298558	0.0671362	4.44705	8.70594e-06	0.000139442
AT5G40950	8039.44	0.298398	0.0730012	4.08758	4.35899e-05	0.000577637
AT3G55610	2240.31	0.298363	0.0938845	3.17798	0.00148303	0.0113615
AT2G22360	733.61	0.298258	0.0841357	3.54496	0.000392679	0.00382366
AT1G17850	403.013	0.298179	0.0944131	3.15824	0.00158726	0.0119968
AT2G34560	1274.08	0.297599	0.0644029	4.6209	3.82084e-06	6.74734e-05
AT4G00030	601.373	0.297525	0.0778199	3.82325	0.000131702	0.00149723
AT5G16810	621.199	0.296649	0.10619	2.79357	0.00521295	0.031112
AT3G18535	344.433	0.296117	0.0971675	3.0475	0.00230757	0.0161958
AT3G57180	597.268	0.296092	0.0879423	3.36689	0.000760205	0.00660048
AT1G56190	3894.74	0.295859	0.0729065	4.05806	4.94827e-05	0.00064445
AT2G15530	591.188	0.295637	0.0903386	3.27254	0.00106586	0.00864214
AT3G54900	2155.46	0.295579	0.0790075	3.74115	0.000183183	0.00199809
AT1G30610	852.791	0.295563	0.0934373	3.16322	0.00156034	0.0118363
AT1G65260	3266.67	0.295353	0.0675205	4.37426	1.21843e-05	0.000187101
AT5G57345	4066.25	0.295286	0.0813158	3.63135	0.000281943	0.00288704
AT4G32470	1906.98	0.295078	0.0517762	5.6991	1.20443e-08	3.7348e-07
AT3G55800	18950.2	0.294757	0.0834912	3.5304	0.000414938	0.00400285
AT3G63190	3959.37	0.294723	0.0594955	4.9537	7.28138e-07	1.53572e-05
AT4G35000	3232.45	0.294669	0.0784518	3.75605	0.000172618	0.00190449
AT2G33600	350.802	0.294575	0.100849	2.92096	0.00348956	0.0226175
AT4G37930	37543.2	0.294493	0.0987505	2.98219	0.0028619	0.019281
AT4G21445	445.519	0.294105	0.0986249	2.98206	0.00286318	0.0192834
AT5G45300	335.491	0.294074	0.100161	2.93601	0.00332461	0.0217582
AT1G44820	461.278	0.293692	0.108041	2.71835	0.00656089	0.0374769
AT2G05210	388.023	0.293638	0.0972826	3.0184	0.00254112	0.0175395
AT5G57170	688.481	0.293536	0.102818	2.85489	0.00430511	0.0268753
AT5G63780	669.534	0.293261	0.0983282	2.98247	0.00285933	0.0192762
AT2G33150	3506.2	0.293222	0.0576264	5.08833	3.61232e-07	8.26275e-06
AT3G25530	1873.88	0.293079	0.0630416	4.64897	3.33589e-06	5.9977e-05
AT2G05620	2362.78	0.292482	0.101993	2.86766	0.00413523	0.0260136
AT1G27340	549.922	0.292345	0.092495	3.16066	0.00157411	0.0119191
AT3G01980	375.861	0.292338	0.0865439	3.37791	0.000730386	0.00638414
AT3G04120	8761.23	0.292084	0.064467	4.53075	5.8774e-06	9.83721e-05
AT2G20020	917.116	0.291986	0.0932341	3.13175	0.00173768	0.0128632
AT1G05470	321.881	0.291897	0.110058	2.65222	0.00799633	0.0439999
AT3G20320	866.002	0.291173	0.0948927	3.06844	0.00215179	0.0153034
AT1G79790	1048.82	0.290867	0.0860546	3.38003	0.000724781	0.00634046
AT2G28000	10804.2	0.290762	0.088535	3.28415	0.0010229	0.00835577
AT5G58490	956.428	0.290627	0.0617373	4.70748	2.50794e-06	4.67028e-05
AT3G01120	7127.06	0.290514	0.0857506	3.3879	0.000704301	0.00619724
AT5G27730	716.521	0.290346	0.0917265	3.16535	0.00154898	0.0117544
AT2G36835	663.723	0.290317	0.0942177	3.08135	0.00206068	0.0147815
AT3G63370	283.745	0.29024	0.101969	2.84636	0.00442218	0.0274254
AT2G48120	616.881	0.290237	0.0852564	3.40429	0.000663369	0.00589422
AT3G48610	731.585	0.289993	0.098092	2.95633	0.00311321	0.0206602
AT5G12150	2846.14	0.289687	0.0534283	5.42197	5.89443e-08	1.58488e-06
AT1G78670	540.575	0.289	0.0905291	3.19234	0.00141125	0.010892
AT2G35010	365.447	0.288716	0.100625	2.86922	0.00411479	0.0259045
AT1G04790	472.305	0.288658	0.0966485	2.98668	0.00282028	0.0190685
AT2G47690	787.053	0.288395	0.0752647	3.83174	0.000127239	0.00145442
AT4G28440	827.693	0.287676	0.0898532	3.20162	0.00136655	0.0106255
AT1G53280	965.732	0.287617	0.0682247	4.21573	2.48971e-05	0.000353651
AT1G20696	1668.7	0.287147	0.0726569	3.95209	7.74714e-05	0.000949617
AT5G02240	2373.55	0.28711	0.0602946	4.76178	1.91891e-06	3.70244e-05
AT2G30150	379.525	0.286885	0.0927853	3.09192	0.00198866	0.014339
AT5G55820	432.905	0.286461	0.105841	2.70653	0.00679907	0.0386046
AT1G06110	497.903	0.286265	0.0912347	3.13768	0.00170293	0.0126508
AT4G15940	431.019	0.286104	0.100176	2.85601	0.00429	0.026789
AT1G53240	4997.75	0.28599	0.0484818	5.89892	3.65886e-09	1.2665e-07
AT4G33680	2628.38	0.285766	0.0608512	4.69614	2.65123e-06	4.91079e-05
AT2G04270	993.675	0.285716	0.0862034	3.31445	0.000918251	0.00765381
AT3G07430	1489.18	0.285626	0.102531	2.78575	0.00534034	0.0316862
AT3G61700	722.116	0.285177	0.0791823	3.60152	0.000316362	0.00318471
AT2G32440	655.153	0.285041	0.0764754	3.72722	0.0001936	0.00209571
AT3G26070	2423.35	0.284867	0.0897409	3.17432	0.00150187	0.0114679
AT2G26740	1078.96	0.284716	0.0794934	3.58163	0.000341462	0.00338667
AT3G26740	6927.6	0.28459	0.0814872	3.49245	0.000478606	0.00449041
AT5G16540	638.561	0.284554	0.0796564	3.57227	0.000353903	0.00349509
AT5G45390	4911.17	0.28447	0.0568788	5.00133	5.69366e-07	1.23588e-05
AT5G65260	794.675	0.283989	0.0823242	3.44964	0.000561325	0.00512123
AT2G32010	478.307	0.283586	0.101981	2.78076	0.00542318	0.0320864
AT1G03310	1067.91	0.28355	0.0829244	3.41938	0.000627631	0.00563004
AT3G58560	1187.46	0.283536	0.0694077	4.08508	4.40618e-05	0.000582588
AT5G42070	825.045	0.283024	0.0994267	2.84656	0.00441946	0.0274167
AT5G42030	809.346	0.28278	0.0753092	3.75492	0.000173397	0.00191077
AT5G55070	1161.96	0.282749	0.0729079	3.87817	0.000105246	0.00124115
AT5G23120	5578.55	0.282631	0.076208	3.70868	0.000208344	0.00222983
AT2G44620	1125.39	0.282578	0.063209	4.47054	7.80237e-06	0.000126624
AT2G39950	471.756	0.28216	0.0852276	3.31066	0.000930769	0.0077334
AT2G31955	309.77	0.282129	0.0973772	2.89728	0.00376417	0.0239761
AT4G13100	381.158	0.282119	0.097007	2.90823	0.00363484	0.0233774
AT3G28760	340.819	0.281929	0.100094	2.81665	0.00485278	0.0294903
AT5G67590	1522.58	0.281553	0.0647606	4.34759	1.37641e-05	0.00020905
AT3G14330	507.245	0.281467	0.0948096	2.96876	0.00299006	0.019951
AT2G35840	1405.17	0.281164	0.103123	2.72649	0.00640116	0.0367459
AT5G20140	882.085	0.281029	0.0943699	2.97795	0.00290181	0.0194681
AT1G55140	459.903	0.280692	0.0863848	3.24932	0.00115681	0.00924293
AT5G50350	262.47	0.280609	0.0991091	2.83132	0.00463567	0.0284698
AT1G67090	264515	0.280511	0.0812396	3.45288	0.000554628	0.00506901
AT1G74070	1442.99	0.28039	0.0691434	4.05519	5.00933e-05	0.000651181
AT3G50240	869.562	0.280219	0.0687648	4.07504	4.60071e-05	0.000604856
AT3G13470	3975.63	0.279715	0.0825653	3.38781	0.000704542	0.00619724
AT5G02120	1609.19	0.279567	0.0925465	3.02083	0.00252087	0.0174344
AT2G22670	3615.5	0.279466	0.064778	4.31421	1.60177e-05	0.000239954
AT3G18420	556.897	0.279432	0.0933666	2.99284	0.00276391	0.0187542
AT3G23400	3549.26	0.279418	0.0953338	2.93095	0.00337932	0.0220401
AT5G17170	3127.22	0.279058	0.0843102	3.30989	0.000933316	0.00774838
AT4G35750	1472.46	0.278941	0.092449	3.01724	0.00255087	0.0175894
AT4G24280	8747.32	0.27887	0.0574806	4.85155	1.22497e-06	2.47106e-05
AT5G22880	2472.49	0.278488	0.0748669	3.71978	0.000199398	0.00214509
AT1G67350	1101.63	0.277827	0.0660989	4.2032	2.63163e-05	0.000371279
AT2G39470	2800.57	0.277739	0.0871306	3.18761	0.00143452	0.0110345
AT4G16760	1504.89	0.277606	0.0700054	3.96549	7.32443e-05	0.000906332
AT4G21100	565.87	0.277591	0.0762445	3.64081	0.000271785	0.00280177
AT3G06980	2418.09	0.277118	0.0691028	4.01022	6.06609e-05	0.000773121
AT5G22620	1176.41	0.276873	0.0855739	3.23548	0.00121437	0.00961806
AT2G41540	591.94	0.276664	0.0873212	3.16835	0.00153305	0.0116675
AT3G06010	679.801	0.276655	0.0805667	3.43386	0.000595053	0.00538649
AT1G11910	6518.47	0.276558	0.0630083	4.38924	1.13748e-05	0.00017636
AT5G57180	1242.87	0.276459	0.097381	2.83894	0.00452639	0.0279386
AT3G52750	1194.67	0.276213	0.0715384	3.86104	0.000112905	0.00131474
AT2G24090	4456.91	0.276004	0.0691936	3.98886	6.63913e-05	0.00083492
AT2G02130	1303.45	0.275978	0.06029	4.57752	4.7053e-06	8.09653e-05
AT2G44760	752.081	0.275949	0.0827797	3.33353	0.000857499	0.0072607
AT2G45990	531.909	0.275463	0.09407	2.92828	0.00340843	0.0221884
AT3G52640	572.319	0.275406	0.077995	3.53107	0.000413886	0.0039947
AT1G44575	30640.4	0.275228	0.0880133	3.12712	0.00176528	0.0130113
AT5G15910	421.715	0.275207	0.0981643	2.80353	0.0050546	0.0303948
AT5G24300	3510.12	0.275192	0.0635621	4.3295	1.49451e-05	0.000225508
AT3G49290	301.217	0.275057	0.10305	2.66916	0.00760405	0.0423445
AT1G27760	768.378	0.274904	0.0816255	3.36787	0.000757509	0.00658256
AT1G08480	787.699	0.274891	0.0689338	3.98775	6.6702e-05	0.000837972
AT1G50140	790.735	0.274868	0.070371	3.90599	9.38413e-05	0.00112125
AT2G24650	409.567	0.274791	0.104471	2.63031	0.00853072	0.0462443
AT1G70610	901.578	0.27459	0.101008	2.71851	0.00655772	0.0374736
AT1G29400	1770.89	0.274521	0.100014	2.74484	0.00605408	0.0352093
AT5G03880	2852.37	0.274503	0.0891456	3.07926	0.00207512	0.0148698
AT1G12900	35933.2	0.274077	0.0921529	2.97415	0.00293797	0.0196601
AT1G04630	585.256	0.274052	0.105441	2.59911	0.00934663	0.049812
AT3G26744	1076.9	0.273793	0.090399	3.02871	0.00245597	0.0170582
AT1G66430	1386.21	0.273665	0.089021	3.07416	0.00211094	0.0150643
AT1G76050	483	0.273636	0.0993392	2.75456	0.0058771	0.0343281
AT5G49210	294.142	0.273484	0.102782	2.66082	0.00779509	0.0431891
AT1G48540	780.732	0.273466	0.0739963	3.69568	0.000219301	0.00233707
AT4G39120	333.853	0.273371	0.103164	2.64988	0.008052	0.0441895
AT5G01410	3550.51	0.273179	0.104952	2.6029	0.00924393	0.0493783
AT2G16365	467.408	0.272796	0.0818607	3.33244	0.000860886	0.00728641
AT4G01150	19521.1	0.272664	0.0818939	3.32948	0.000870096	0.00734349
AT4G34730	1558.17	0.272342	0.0916822	2.9705	0.0029732	0.0198639
AT3G21790	490.797	0.272094	0.0822295	3.30895	0.000936459	0.00776678
AT4G37330	617.638	0.272092	0.0951478	2.85967	0.00424078	0.0265518
AT4G02890	2238.32	0.271881	0.0958743	2.83581	0.00457101	0.0281688
AT5G17560	841.539	0.271744	0.0884882	3.07096	0.00213374	0.0151906
AT5G41480	244.115	0.271636	0.104576	2.59748	0.00939094	0.049946
AT5G27670	938.732	0.271594	0.0826986	3.28415	0.00102292	0.00835577
AT1G09815	456.394	0.271578	0.0894314	3.03672	0.00239166	0.0166848
AT1G11840	5841.02	0.271539	0.0828557	3.27725	0.00104823	0.00850748
AT2G05990	2902.82	0.271536	0.0689539	3.93794	8.21841e-05	0.00100041
AT1G76460	370.049	0.271519	0.104055	2.60939	0.0090705	0.0485765
AT3G26380	425.922	0.271175	0.0943106	2.87534	0.00403596	0.0254698
AT1G55090	982.861	0.270926	0.0756073	3.58333	0.00033924	0.00337245
AT1G68300	341.727	0.270774	0.103043	2.62777	0.00859454	0.0465177
AT2G45740	1717.01	0.270744	0.0835131	3.24194	0.0011872	0.00943875
AT3G46430	1082.03	0.270742	0.0650991	4.15891	3.19763e-05	0.000440398
AT5G46570	349.865	0.270652	0.0896812	3.01793	0.00254509	0.0175553
AT5G02250	866.822	0.270546	0.0707165	3.82578	0.00013036	0.0014852
AT5G65685	662.76	0.269991	0.0919806	2.93531	0.00333219	0.0217942
AT3G09410	437.083	0.269863	0.0915628	2.9473	0.00320561	0.021112
AT5G58370	306.562	0.269841	0.0979327	2.75537	0.00586249	0.0342768
AT1G13280	457.414	0.269793	0.0995342	2.71056	0.00671697	0.0382114
AT5G45670	820.521	0.269409	0.0928383	2.90191	0.00370893	0.023742
AT4G23980	590.353	0.268842	0.0757308	3.54998	0.000385267	0.00376022
AT5G10470	1845.12	0.268733	0.0952347	2.8218	0.00477555	0.0291262
AT5G27560	1002.02	0.268622	0.0657053	4.08829	4.34574e-05	0.000576793
AT2G44090	915.397	0.268018	0.0671535	3.99112	6.5762e-05	0.000828506
AT1G28960	323.899	0.267894	0.0944006	2.83784	0.00454194	0.0280263
AT2G01930	503.381	0.267739	0.102574	2.61019	0.00904918	0.0484872
AT4G27560	429.629	0.267668	0.100858	2.65392	0.00795638	0.0438446
AT1G18660	935.68	0.267495	0.0837008	3.19585	0.00139422	0.0108123
AT1G17220	8989.43	0.267329	0.0571756	4.67558	2.93121e-06	5.33455e-05
AT1G10360	995.756	0.267192	0.0894344	2.98757	0.00281202	0.0190312
AT2G35490	2272.84	0.267079	0.0537014	4.97341	6.57866e-07	1.4089e-05
AT5G37360	1804.82	0.266918	0.0839418	3.1798	0.00147376	0.0112947
AT1G78210	386.273	0.266692	0.0926542	2.87836	0.00399746	0.0252574
AT1G15390	591.482	0.266347	0.1008	2.64233	0.00823385	0.0450333
AT4G13360	621.855	0.266272	0.077671	3.42821	0.000607583	0.00548087
AT3G07720	388.813	0.266212	0.0977054	2.72464	0.00643712	0.0369014
AT5G34850	2758.21	0.26616	0.059635	4.46316	8.07603e-06	0.00013076
AT4G38800	1414.15	0.265429	0.0577734	4.59431	4.34174e-06	7.52063e-05
AT3G04520	468.349	0.265294	0.0880872	3.01172	0.00259768	0.0178531
AT3G52880	5581.69	0.265218	0.0722772	3.66946	0.000243065	0.00254778
AT1G12230	1609.48	0.265116	0.0584925	4.53247	5.82973e-06	9.77312e-05
AT1G02150	2712.85	0.264923	0.0760646	3.48287	0.000496065	0.00462298
AT3G12260	541.888	0.264881	0.0851231	3.11174	0.00185989	0.0135607
AT1G78610	500.843	0.264698	0.0870408	3.04109	0.00235727	0.016489
AT5G12860	7889.56	0.264445	0.0510004	5.18516	2.15834e-07	5.14593e-06
AT4G34870	4308.6	0.263652	0.0572652	4.60406	4.14342e-06	7.21308e-05
AT2G22660	991.289	0.26353	0.100953	2.61044	0.00904267	0.0484648
AT4G25520	518.604	0.263327	0.095615	2.75403	0.00588664	0.0343698
AT3G44530	289.253	0.26325	0.0995891	2.64336	0.00820884	0.0449083
AT3G62130	504.514	0.263232	0.0882825	2.9817	0.00286653	0.0192885
AT1G74470	36278.9	0.263009	0.0747878	3.51674	0.000436889	0.00416827
AT3G51880	1315.42	0.262877	0.0699797	3.75647	0.000172327	0.00190299
AT3G54440	1481.3	0.262682	0.0734107	3.57826	0.000345896	0.00342575
AT5G20070	966.713	0.262626	0.0790602	3.32185	0.000894224	0.00748949
AT2G39670	1618.93	0.262435	0.0925342	2.83609	0.00456701	0.028156
AT3G28860	3544.32	0.262233	0.0710948	3.6885	0.00022558	0.00238853
AT5G63860	2230.87	0.262228	0.0598034	4.38483	1.16074e-05	0.000179134
AT3G27240	1327.32	0.262067	0.0801395	3.27014	0.00107495	0.00869555
AT1G64370	4712.68	0.262059	0.081981	3.19658	0.00139065	0.0107887
AT5G25220	788.235	0.261996	0.0830097	3.15621	0.00159834	0.0120587
AT5G64340	1038.59	0.261979	0.0729387	3.59176	0.000328447	0.00329364
AT4G23860	415.285	0.261887	0.0982073	2.66667	0.00766065	0.0426142
AT1G15660	398.568	0.261737	0.0858517	3.04871	0.00229826	0.0161576
AT2G43630	810.887	0.261731	0.0998651	2.62085	0.0087712	0.0472773
AT2G29630	4013.89	0.261328	0.093276	2.80167	0.00508389	0.0305473
AT5G43810	1048.18	0.261178	0.099556	2.62342	0.00870507	0.047006
AT3G01280	2008.22	0.261128	0.051819	5.03924	4.6739e-07	1.03943e-05
AT4G13460	679.861	0.260791	0.0705926	3.69431	0.000220484	0.0023465
AT3G63410	8108.9	0.260383	0.0652681	3.98944	6.62295e-05	0.000833632
AT3G51250	628.698	0.260082	0.076483	3.40052	0.000672585	0.00596296
AT1G05830	940.966	0.259588	0.068212	3.8056	0.000141462	0.0015934
AT1G31190	881.268	0.259476	0.0929952	2.79021	0.00526743	0.031316
AT5G42480	830.136	0.259346	0.0811702	3.19509	0.00139789	0.0108367
AT1G04830	272.483	0.259306	0.0983773	2.63583	0.00839314	0.0456529
AT5G09460	1624.59	0.259269	0.082346	3.14853	0.00164096	0.0123088
AT4G14910	477.699	0.25893	0.0981785	2.63734	0.00835594	0.0454981
AT5G17530	682.553	0.258855	0.0846088	3.05943	0.00221756	0.0156589
AT5G57930	1987.02	0.258842	0.0675689	3.83079	0.000127734	0.00145928
AT5G12140	1678.68	0.258261	0.0625358	4.12982	3.63055e-05	0.000493499
AT4G15840	588.313	0.257944	0.0961893	2.68162	0.00732656	0.0410516
AT1G68560	5595.56	0.25787	0.0601285	4.28865	1.79764e-05	0.000265574
AT4G39460	1298.79	0.257751	0.0806892	3.19436	0.0014014	0.0108476
AT1G79230	1521.77	0.257197	0.0533666	4.81943	1.43966e-06	2.83551e-05
AT2G41680	4305.69	0.257126	0.0571418	4.49979	6.80194e-06	0.000112047
AT2G19940	1043.94	0.257124	0.0738791	3.48034	0.000500785	0.00466072
AT5G66470	1491.71	0.256678	0.0791681	3.24219	0.00118615	0.009434
AT5G57330	1090.11	0.256425	0.0647247	3.96178	7.43925e-05	0.00091673
AT3G20060	840.886	0.256239	0.0654689	3.91391	9.08132e-05	0.00108819
AT3G46980	491.86	0.255984	0.0871405	2.9376	0.0033076	0.0216605
AT1G32500	1576.32	0.255969	0.0737894	3.46891	0.000522573	0.00483328
AT2G01590	890.854	0.255931	0.09378	2.72905	0.00635166	0.0365725
AT1G57770	1246.55	0.25532	0.0917514	2.78274	0.00539027	0.0319098
AT4G26700	1341.73	0.255302	0.0650653	3.92379	8.71669e-05	0.00105176
AT2G36460	1571.49	0.254983	0.0577743	4.41342	1.0175e-05	0.000160004
AT5G42310	988.14	0.254093	0.0833715	3.04771	0.00230589	0.0161957
AT4G00750	491.132	0.254073	0.0959443	2.64813	0.00809382	0.0443606
AT5G39040	595.636	0.253854	0.0760413	3.33837	0.000842714	0.00716462
AT5G60360	5038.66	0.253801	0.0839065	3.02481	0.00248788	0.0172636
AT2G26280	1643.27	0.253524	0.0851996	2.97564	0.00292377	0.0195839
AT1G24360	1960.15	0.252873	0.0614637	4.11418	3.88553e-05	0.00052242
AT1G31180	1487.04	0.252712	0.0835808	3.02357	0.00249813	0.0173059
AT5G23890	1934.95	0.251767	0.0509517	4.94129	7.76066e-07	1.62203e-05
AT4G28080	12976.7	0.251624	0.0708921	3.54939	0.000386128	0.00376515
AT1G67785	1367.12	0.251578	0.0861952	2.9187	0.00351497	0.0227539
AT1G42480	375.569	0.251192	0.0910816	2.75788	0.00581782	0.0340634
AT3G03890	699.963	0.250998	0.0830323	3.0229	0.00250364	0.0173382
AT3G16520	2517.03	0.250869	0.0743417	3.37454	0.000739386	0.00645244
AT1G45130	804.746	0.250206	0.0689853	3.62695	0.000286788	0.00293089
AT3G15160	622.67	0.250088	0.087531	2.85714	0.00427484	0.0267104
AT3G51840	2876.48	0.249838	0.0584013	4.27794	1.88629e-05	0.000277197
AT4G29750	1120.75	0.249744	0.0740627	3.37206	0.000746073	0.00649701
AT5G47320	555.693	0.249684	0.0832966	2.99753	0.00272173	0.0185163
AT4G30950	8854.37	0.24895	0.0800216	3.11104	0.00186433	0.0135883
AT1G70370	2981.45	0.248948	0.0739723	3.36542	0.000764273	0.00661925
AT4G09650	18565.8	0.248714	0.0745824	3.33476	0.000853736	0.0072465
AT5G65460	760.612	0.248696	0.0731412	3.40021	0.00067333	0.00596296
AT1G07910	381.38	0.24861	0.0919148	2.70479	0.0068348	0.0387861
AT2G45380	600.755	0.248252	0.088941	2.7912	0.00525137	0.0312473
AT5G42390	5313.65	0.247966	0.0677889	3.65791	0.000254278	0.00265331
AT1G72160	1959.46	0.247698	0.080213	3.088	0.00201505	0.0145042
AT1G63640	560.098	0.247289	0.08417	2.93797	0.00330372	0.0216419
AT4G34830	2562.01	0.247286	0.0680134	3.63584	0.000277079	0.00284562
AT1G22630	1127.25	0.246563	0.0856469	2.87884	0.00399147	0.0252349
AT2G35370	6679.99	0.246088	0.0749653	3.28269	0.00102822	0.00838922
AT2G26500	13379.2	0.24604	0.0910821	2.7013	0.00690695	0.0390893
AT1G10200	1043.51	0.245892	0.075783	3.24469	0.00117579	0.00936585
AT5G57960	653.087	0.24552	0.0903155	2.71847	0.0065585	0.0374736
AT2G28540	612.333	0.245383	0.0841802	2.91497	0.00355727	0.0229778
AT1G12780	1386.27	0.244919	0.0865467	2.82991	0.00465608	0.0285363
AT4G21470	446.866	0.243975	0.0834871	2.92231	0.00347443	0.0225475
AT1G65660	716.769	0.243752	0.0742732	3.28183	0.00103137	0.008405
AT2G21960	1665.34	0.24374	0.0829852	2.93715	0.00331243	0.0216854
AT5G64050	1899.97	0.243145	0.0696628	3.49031	0.000482469	0.00452258
AT5G25590	472.548	0.24271	0.083318	2.91305	0.00357917	0.0230978
AT4G35300	1194.3	0.242532	0.0693321	3.49812	0.000468559	0.00441602
AT4G01050	11033.5	0.242507	0.0663582	3.65451	0.000257674	0.00267667
AT5G25360	471.915	0.242503	0.0772908	3.13754	0.00170371	0.0126521
AT3G22190	454.615	0.242086	0.0906372	2.67094	0.00756399	0.0421665
AT1G05140	933.055	0.241634	0.0864384	2.79545	0.00518274	0.0309894
AT4G25670	440.027	0.241611	0.0867551	2.78498	0.00535314	0.031726
AT5G08590	1181.98	0.241513	0.0627367	3.84963	0.000118298	0.00136675
AT1G58270	1584.87	0.241233	0.070223	3.43524	0.000592033	0.00536616
AT5G25560	2350.28	0.241196	0.0575426	4.1916	2.76993e-05	0.000386604
AT5G43940	3355.02	0.240672	0.0582452	4.13205	3.59546e-05	0.000489048
AT1G04690	1326.71	0.240241	0.0643665	3.7324	0.000189667	0.00205955
AT5G57030	1942.53	0.240155	0.0679425	3.53469	0.000408258	0.00395164
AT5G66570	81095.4	0.240001	0.0776611	3.09037	0.00199909	0.0144042
AT4G40030	3431.34	0.239505	0.0866271	2.76478	0.00569605	0.0334816
AT5G53130	661.05	0.239158	0.0728009	3.28509	0.00101949	0.00834085
AT5G18660	2678.82	0.239113	0.0617465	3.87249	0.000107729	0.00126614
AT5G10160	714.285	0.238989	0.082139	2.90957	0.00361926	0.023306
AT5G28750	2127.55	0.238892	0.0701758	3.4042	0.000663588	0.00589422
AT2G29450	1899.47	0.238883	0.0704215	3.39219	0.000693356	0.00611692
AT1G36320	1497.56	0.238862	0.0745067	3.20592	0.00134633	0.0104839
AT1G21350	824.9	0.238534	0.0831821	2.86761	0.00413586	0.0260136
AT5G62650	524.702	0.238469	0.086143	2.7683	0.00563504	0.0331797
AT3G20720	569.902	0.237501	0.0841994	2.8207	0.00479186	0.0291967
AT1G66530	462.476	0.237489	0.0814275	2.91657	0.00353905	0.0228885
AT1G78180	440.359	0.237382	0.0913415	2.59884	0.00935397	0.0498302
AT3G10230	1114.43	0.237336	0.0887909	2.67298	0.00751806	0.0419554
AT3G49140	2326.88	0.23709	0.0802457	2.95455	0.00313126	0.0207535
AT3G20970	380.905	0.236211	0.0903409	2.61467	0.00893145	0.0479922
AT1G70160	1556.19	0.235661	0.0819727	2.87487	0.00404199	0.0254924
AT4G13250	1968.96	0.235407	0.0769135	3.06068	0.00220838	0.01561
AT1G77260	625.428	0.235374	0.0872581	2.69744	0.00698749	0.0394641
AT1G07080	1126.79	0.235293	0.0861853	2.73008	0.00633183	0.0364785
AT2G19110	884.406	0.234705	0.0817197	2.87207	0.00407793	0.0256958
AT1G03250	469.06	0.233896	0.0779699	2.99982	0.00270136	0.0184258
AT2G47490	493.981	0.233497	0.0885005	2.63837	0.00833054	0.0454191
AT5G35360	4118.63	0.233476	0.0486816	4.79597	1.61887e-06	3.16454e-05
AT1G48030	5854.78	0.233384	0.0738802	3.15895	0.00158336	0.0119761
AT4G10060	2736.7	0.233316	0.0699797	3.33405	0.000855919	0.00725531
AT1G77490	2705.24	0.232731	0.0745788	3.12061	0.00180478	0.013247
AT2G31670	953.505	0.232542	0.0637508	3.64768	0.000264621	0.00273793
AT4G24620	2554.23	0.232359	0.0631342	3.6804	0.000232865	0.00245445
AT2G21870	4641.23	0.232083	0.0448224	5.17782	2.24491e-07	5.33403e-06
AT2G26330	2007.75	0.231835	0.0624425	3.71277	0.000205	0.00219762
AT2G14740	770.462	0.231632	0.0710845	3.25854	0.00111986	0.00899257
AT1G65040	472.06	0.230823	0.0844366	2.73369	0.00626297	0.0362019
AT4G34350	7945.73	0.230737	0.0873991	2.64004	0.00828972	0.0452676
AT4G36195	922.192	0.230582	0.0687211	3.35533	0.000792712	0.00680615
AT3G19170	8274.13	0.230475	0.0751394	3.0673	0.00216005	0.0153412
AT5G23140	620.72	0.229942	0.0750451	3.06405	0.00218359	0.015461
AT5G43750	2184.74	0.22951	0.0858155	2.67446	0.00748502	0.0417934
AT3G55380	460.784	0.228802	0.0830837	2.75388	0.0058894	0.0343763
AT5G60690	653.379	0.22815	0.0687925	3.31649	0.000911545	0.00761008
AT5G66510	1082.52	0.228136	0.0722288	3.15852	0.00158573	0.0119897
AT5G22340	1412.87	0.227647	0.0640875	3.55213	0.000382133	0.00373669
AT5G02740	536.903	0.227519	0.0750415	3.03192	0.00243007	0.0169074
AT1G55490	15212.6	0.22751	0.0842071	2.70179	0.00689663	0.0390593
AT5G66530	1636.11	0.227117	0.0641311	3.54145	0.000397934	0.00386859
AT1G08880	1164.4	0.22694	0.06509	3.48655	0.000489294	0.00457038
AT4G19210	2041.58	0.226876	0.0698173	3.24956	0.00115583	0.00923867
AT5G45170	993.737	0.226734	0.072047	3.14703	0.00164937	0.0123454
AT3G56140	1300.3	0.226641	0.0632506	3.58322	0.000339381	0.00337245
AT5G62700	4260.84	0.22657	0.0476356	4.75631	1.97164e-06	3.79363e-05
AT3G44480	1350.87	0.226323	0.0853232	2.65254	0.00798879	0.04397
AT5G63890	1232.54	0.226201	0.0674859	3.35183	0.000802803	0.00687297
AT5G13590	931.528	0.225993	0.0674204	3.352	0.000802299	0.00687148
AT3G56940	24251.7	0.225657	0.078055	2.891	0.00384019	0.0243935
AT1G09010	1593.41	0.225507	0.0529661	4.25758	2.06655e-05	0.000300298
AT1G53840	1157.83	0.22541	0.0806836	2.79375	0.00521011	0.0311084
AT3G63140	6562.25	0.22537	0.080005	2.81695	0.00484816	0.0294708
AT1G12050	854.621	0.225347	0.0779045	2.8926	0.00382063	0.02428
AT1G14710	1329.54	0.2248	0.0623735	3.60409	0.00031325	0.00315644
AT1G29670	1623.05	0.224525	0.0773849	2.9014	0.00371501	0.023744
AT1G51070	1079.24	0.224502	0.0729922	3.0757	0.00210012	0.0150025
AT2G20360	2715.59	0.224344	0.0484178	4.63349	3.59545e-06	6.38177e-05
AT4G24350	424.062	0.224223	0.0821681	2.72884	0.0063558	0.0365762
AT5G65760	507.292	0.224118	0.0799983	2.80153	0.00508611	0.0305475
AT5G45930	1891.89	0.224072	0.0662702	3.38118	0.000721747	0.00632188
AT5G61960	1354.93	0.223931	0.0655049	3.41853	0.000629592	0.00564277
AT2G43090	2539.06	0.223856	0.0600523	3.72769	0.000193245	0.00209404
AT5G22510	1787.15	0.223449	0.0814717	2.74266	0.00609434	0.0353743
AT4G25130	2824.78	0.223194	0.061682	3.61845	0.000296368	0.00300668
AT4G38160	1115.22	0.223084	0.0821198	2.71656	0.00659633	0.037669
AT3G58610	10045.2	0.222925	0.0603649	3.69296	0.000221656	0.00235537
AT1G26550	1648.7	0.222659	0.0626207	3.55567	0.00037701	0.00370224
AT1G80460	1184.3	0.222594	0.0719747	3.09267	0.00198366	0.0143079
AT5G08540	1201.31	0.22253	0.0760965	2.92431	0.00345223	0.0224174
AT5G52920	3880.85	0.222473	0.0626709	3.54986	0.000385441	0.00376022
AT1G06820	972.426	0.222442	0.071569	3.10807	0.00188311	0.0136914
AT1G44000	2637.3	0.222196	0.0786471	2.82523	0.00472466	0.0288818
AT1G75210	1015.79	0.222137	0.0637469	3.48467	0.000492741	0.00459623
AT5G16150	3359.13	0.222036	0.0697801	3.18193	0.00146296	0.0112243
AT3G56160	1405.14	0.221802	0.0769911	2.88088	0.00396567	0.0250926
AT2G04842	2350.35	0.221122	0.0609955	3.62522	0.000288712	0.00294333
AT1G08110	1568.57	0.220942	0.0579419	3.81316	0.000137199	0.00154956
AT1G30380	41167.4	0.220742	0.078517	2.8114	0.00493271	0.0298561
AT5G05740	2246.29	0.219948	0.0721022	3.05051	0.00228457	0.0160722
AT5G59613	2666.64	0.219866	0.0660412	3.32923	0.000870879	0.00734415
AT2G25320	577.186	0.219681	0.0731429	3.00345	0.00266933	0.0182492
AT5G64400	2773.03	0.219422	0.0665036	3.29939	0.000968938	0.00798684
AT3G55040	953.795	0.219267	0.0808859	2.71082	0.00671165	0.0381915
AT1G64430	1166.74	0.219206	0.0837105	2.61862	0.00882851	0.0475248
AT3G50380	1156.31	0.219017	0.0752608	2.9101	0.00361313	0.0232737
AT5G65480	1042.66	0.218485	0.0746542	2.92662	0.00342664	0.0222863
AT5G19370	1281.49	0.218163	0.0736571	2.96188	0.0030577	0.0203249
AT3G51310	963.471	0.21777	0.0616426	3.53279	0.000411199	0.00397613
AT3G03710	2201.52	0.217285	0.0725564	2.99471	0.00274707	0.0186704
AT4G21580	591.546	0.217256	0.0787962	2.75719	0.00583006	0.0341159
AT5G55220	5037.44	0.217011	0.0672657	3.22618	0.00125454	0.00986863
AT3G61690	978.034	0.216415	0.0679938	3.18286	0.00145829	0.0111967
AT5G39830	1395.81	0.216179	0.0682604	3.16697	0.00154036	0.0117104
AT3G53560	1154.93	0.215733	0.0698055	3.09048	0.0019983	0.0144035
AT2G41720	820.436	0.215695	0.0715095	3.01632	0.00255866	0.0176198
AT2G17240	1189.78	0.215631	0.0703898	3.06338	0.0021885	0.0154905
AT2G26800	890.088	0.215422	0.0783631	2.74902	0.00597729	0.0348113
AT1G10090	492.673	0.215405	0.0815365	2.64183	0.00824596	0.0450877
AT5G55390	885.375	0.215358	0.0679887	3.16756	0.00153725	0.0116933
AT3G16290	2104.56	0.214459	0.0612423	3.50181	0.000462113	0.00436515
AT2G36000	1099.59	0.214214	0.076467	2.80139	0.00508831	0.0305475
AT5G11480	1487.11	0.214128	0.0706453	3.03102	0.00243726	0.0169461
AT3G51630	753.484	0.213135	0.0730948	2.91587	0.00354695	0.0229254
AT3G24430	2959.84	0.212822	0.0610066	3.4885	0.000485732	0.00454703
AT2G37630	854.645	0.212754	0.0714576	2.97735	0.00290753	0.0195002
AT4G38360	530.084	0.212358	0.0794564	2.67263	0.00752589	0.0419878
AT5G04440	844.364	0.211848	0.0758489	2.79303	0.00522164	0.0311416
AT5G08650	4123.09	0.211546	0.0752248	2.81219	0.00492054	0.0298151
AT5G21060	580.905	0.211515	0.0814239	2.59769	0.0093852	0.0499282
AT1G32080	5732.36	0.211509	0.0794782	2.66122	0.00778575	0.0431488
AT4G29480	1068.04	0.211263	0.0661957	3.19149	0.0014154	0.0109156
AT4G33740	716.334	0.211046	0.0741301	2.84697	0.0044138	0.0273897
AT3G53500	1534.86	0.210793	0.0679089	3.10406	0.00190886	0.0138354
AT4G09680	641.112	0.210395	0.0810052	2.59731	0.00939576	0.0499462
AT3G27850	6400.17	0.210344	0.0576156	3.65081	0.000261414	0.00270743
AT2G23820	538.167	0.210318	0.074806	2.81152	0.00493083	0.0298561
AT3G11945	1030.82	0.209963	0.0782121	2.68454	0.00726297	0.040772
AT3G56130	1355.05	0.209671	0.0657608	3.18839	0.0014307	0.0110092
AT2G27730	1413.82	0.209548	0.0772864	2.71131	0.00670172	0.0381455
AT5G13120	2781.54	0.209464	0.0667483	3.13812	0.00170034	0.0126451
AT5G66120	1646.77	0.20883	0.0667767	3.12728	0.00176432	0.0130097
AT2G41530	1562.89	0.208615	0.0594443	3.50941	0.000449095	0.00426732
AT2G20420	2170.08	0.207827	0.0466595	4.45413	8.42359e-06	0.00013565
AT1G47260	1818.65	0.207824	0.0494784	4.2003	2.66556e-05	0.000374867
AT2G13440	779.354	0.207236	0.0738864	2.80479	0.00503492	0.030288
AT5G41370	966.596	0.207086	0.0699174	2.96187	0.00305781	0.0203249
AT5G11380	467.779	0.207043	0.0767763	2.69671	0.00700286	0.0395355
AT3G06880	1119.24	0.206586	0.0687998	3.00271	0.00267586	0.0182818
AT4G02940	756.811	0.206	0.0767952	2.68246	0.00730822	0.0409819
AT4G31990	3065.49	0.205426	0.0465167	4.41619	1.00457e-05	0.000158106
AT5G47570	1744.72	0.205073	0.0688592	2.97815	0.00289991	0.0194616
AT2G45770	1361.94	0.204796	0.0644869	3.17578	0.00149436	0.0114318
AT4G10730	726.501	0.204419	0.0745641	2.74152	0.00611551	0.0354775
AT1G48830	2448.99	0.203878	0.0647579	3.14832	0.00164212	0.0123088
AT1G64860	3241.01	0.203857	0.0755118	2.69968	0.00694072	0.0392591
AT1G19600	869.576	0.203243	0.0685032	2.96691	0.00300812	0.0200586
AT1G72020	1564.48	0.203105	0.0630035	3.22371	0.00126539	0.00994278
AT5G58020	674.321	0.202952	0.0780643	2.59981	0.00932759	0.0497233
AT3G14650	2087.51	0.202774	0.072796	2.78551	0.00534438	0.0317012
AT1G07790	1066.01	0.202747	0.0772521	2.62449	0.00867788	0.0468957
AT5G26850	1085.53	0.202308	0.0716121	2.82505	0.00472737	0.0288818
AT1G22850	1849.2	0.201332	0.0755761	2.66397	0.0077225	0.0428552
AT1G60950	38010.1	0.201321	0.0729604	2.75932	0.00579215	0.0339513
AT5G57655	2076.55	0.201234	0.0731392	2.75139	0.00593427	0.0346091
AT3G06810	749.526	0.200306	0.0727189	2.75452	0.00587785	0.0343281
AT3G23900	873.266	0.199452	0.0755636	2.63953	0.00830212	0.0452997
AT3G06380	647.526	0.199175	0.0747009	2.66629	0.00766927	0.0426507
AT1G47970	1142.13	0.198993	0.0708453	2.80884	0.00497208	0.0300053
AT3G18035	1749.89	0.198767	0.0582198	3.41409	0.000639957	0.00571355
AT1G07320	10745.9	0.19856	0.0601404	3.3016	0.000961357	0.00793691
AT1G61740	1658.7	0.198547	0.0667683	2.97368	0.00294253	0.0196843
AT4G30580	1177.33	0.198411	0.074859	2.65046	0.00803829	0.0441345
AT2G21380	1340.56	0.198251	0.0674034	2.94127	0.00326874	0.02146
AT3G03250	1889.56	0.196959	0.0730543	2.69607	0.00701633	0.0395901
AT2G47590	3474.62	0.196329	0.0531804	3.69175	0.000222716	0.00236542
AT1G65580	1046.68	0.196009	0.071159	2.75453	0.00587772	0.0343281
AT1G17290	2029.18	0.19509	0.0622221	3.13538	0.00171633	0.0127295
AT4G14430	626.883	0.194971	0.0721058	2.70396	0.00685192	0.0388412
AT1G60710	1635.72	0.194854	0.0667874	2.91753	0.00352812	0.022832
AT3G10160	1139.74	0.194845	0.0739378	2.63525	0.00840751	0.0457186
AT1G80770	1127.6	0.194668	0.0737598	2.63921	0.00830996	0.0453306
AT1G56220	4733.57	0.194562	0.0680615	2.85862	0.0042549	0.0266177
AT5G24690	3368.07	0.194242	0.0652574	2.97655	0.00291513	0.0195323
AT1G77930	926.111	0.193772	0.0730151	2.65386	0.00795759	0.0438446
AT2G46370	836.414	0.192934	0.0707616	2.72653	0.00640039	0.0367459
AT1G80600	2154.69	0.192895	0.0588596	3.2772	0.00104843	0.00850748
AT5G11880	1703.42	0.192547	0.0709259	2.71476	0.00663242	0.0378544
AT1G69830	3936.35	0.191996	0.0672245	2.85605	0.00428952	0.026789
AT5G50000	1122.52	0.191858	0.064349	2.98152	0.00286823	0.0192885
AT3G54360	2165.69	0.191821	0.0598261	3.20632	0.00134445	0.0104771
AT2G42210	1620.14	0.190903	0.0705818	2.7047	0.00683661	0.0387861
AT1G63680	1218.26	0.190303	0.0665365	2.86013	0.00423465	0.0265229
AT3G07480	1318.4	0.189156	0.069295	2.72973	0.00633868	0.0365078
AT3G47520	1554.52	0.189118	0.0552121	3.42529	0.000614135	0.00552324
AT5G48300	6289	0.189051	0.0673728	2.80604	0.00501537	0.0302053
AT3G58680	2130.04	0.187373	0.0534688	3.50433	0.000457751	0.00433179
AT2G21250	1723.63	0.187007	0.063072	2.96498	0.00302707	0.0201592
AT4G15560	13890.8	0.186849	0.069668	2.68199	0.00731864	0.0410292
AT4G21790	1238.47	0.186678	0.0715104	2.61051	0.00904082	0.0484648
AT2G31570	900.675	0.18663	0.0635004	2.93903	0.00329241	0.0215882
AT1G01080	2017.94	0.186596	0.0709362	2.63047	0.00852664	0.0462443
AT2G27950	791.259	0.186251	0.065805	2.83035	0.00464965	0.0285053
AT5G18830	594.659	0.185274	0.0698852	2.65111	0.00802267	0.0440866
AT3G52150	6423.05	0.184787	0.0632858	2.91988	0.00350166	0.0226748
AT1G07820	1247.42	0.184517	0.0593305	3.10998	0.00187101	0.0136227
AT2G01350	797.099	0.184402	0.064345	2.86584	0.0041591	0.0261204
AT2G36530	9139.8	0.184383	0.046339	3.97899	6.92073e-05	0.000865112
AT4G08390	1987.3	0.184347	0.0636901	2.89444	0.0037983	0.0241459
AT5G50850	2649.36	0.183979	0.0593024	3.10238	0.00191969	0.0138946
AT5G47010	2075.39	0.18389	0.0597725	3.07649	0.00209454	0.0149678
AT2G31490	1590.35	0.182759	0.0697168	2.62145	0.00875568	0.0472257
AT3G01910	2213.3	0.182171	0.0568348	3.20527	0.00134935	0.0104996
AT3G26890	1219.07	0.180776	0.0680785	2.65541	0.00792123	0.0436905
AT1G29950	836.634	0.180323	0.0654467	2.75526	0.00586456	0.0342793
AT1G27510	1089.58	0.180303	0.0604586	2.98225	0.00286136	0.019281
AT1G77800	1399.75	0.179735	0.0634305	2.83358	0.00460303	0.0282944
AT4G29060	14335.6	0.179636	0.0607401	2.95745	0.00310199	0.0205923
AT5G03900	1316.22	0.178579	0.065405	2.73035	0.00632665	0.0364764
AT5G65620	2812.37	0.178479	0.054875	3.25246	0.00114409	0.00915887
AT2G21300	1152.47	0.17515	0.0672788	2.60334	0.00923191	0.0493268
AT4G02510	6636.21	0.174635	0.0511499	3.41417	0.000639766	0.00571355
AT5G11770	1986.92	0.174324	0.0557726	3.12562	0.00177429	0.0130649
AT4G13670	1686.98	0.172635	0.0613663	2.81318	0.00490542	0.0297495
AT5G33320	2327.59	0.172196	0.053441	3.22217	0.00127224	0.0099928
AT5G41210	902.497	0.17114	0.0634215	2.69846	0.00696612	0.0393708
AT1G54080	1450.67	0.170415	0.0512265	3.3267	0.000878795	0.00739073
AT2G21520	1369.27	0.168553	0.0559148	3.01446	0.00257439	0.0177222
AT1G71980	1022.81	0.166745	0.0616828	2.70327	0.00686618	0.0389009
AT5G64350	3184.33	0.166343	0.0610563	2.72441	0.00644163	0.0369171
AT4G21105	1537.51	0.165076	0.0518547	3.18343	0.00145543	0.0111807
AT5G59910	4133.61	0.164992	0.0469215	3.51635	0.000437527	0.00416883
AT2G34590	1811.07	0.16465	0.0538887	3.05538	0.00224778	0.0158241
AT1G09210	2771.55	0.164305	0.0600327	2.73692	0.0062018	0.0358802
AT3G26730	1323.88	0.164286	0.062784	2.61668	0.00887889	0.047759
AT2G42130	1129.42	0.163907	0.0628209	2.60911	0.00907771	0.0485901
AT5G47110	4264.4	0.163371	0.0621057	2.63054	0.00852504	0.0462443
AT2G21170	8613.72	0.16313	0.0524487	3.11028	0.00186913	0.0136185
AT5G17770	1782.01	0.161693	0.0565103	2.86129	0.00421917	0.0264498
AT3G52300	3927.5	0.161052	0.0606805	2.65409	0.0079522	0.0438381
AT2G30200	1263.8	0.160203	0.0561556	2.85285	0.00433294	0.0269916
AT4G04770	3200.67	0.160168	0.0588375	2.72221	0.00648461	0.0371304
AT2G18710	2162.78	0.157976	0.0585357	2.69879	0.00695923	0.0393532
AT2G42220	12101.1	0.149772	0.054842	2.73098	0.00631463	0.0364544
AT4G20850	4869.67	0.149721	0.0515958	2.9018	0.0037102	0.023742
AT4G29010	2523.8	0.149149	0.0558459	2.67073	0.00756864	0.0421811
AT5G62000	5070.61	0.142579	0.0471325	3.02507	0.00248577	0.0172546
AT5G08690	5444.06	0.139202	0.0510318	2.72776	0.00637668	0.0366659
AT5G08670	5868.88	0.12886	0.0483481	2.66526	0.00769282	0.0427588
AT4G34110	10333.5	0.123454	0.0452511	2.7282	0.00636819	0.0366272
AT4G14960	9056.28	-0.12141	0.0413043	-2.93939	0.00328854	0.0215764
AT1G10670	3825.85	-0.140865	0.0459009	-3.0689	0.00214847	0.015285
AT1G10950	2110.21	-0.14486	0.0541285	-2.67623	0.00744558	0.0415955
AT3G13920	5801.76	-0.145321	0.0517301	-2.80922	0.00496614	0.0299955
AT5G55660	1976.47	-0.150913	0.054588	-2.76458	0.00569958	0.0334816
AT4G21710	1226.13	-0.153143	0.0580339	-2.63885	0.0083187	0.0453664
AT1G36730	2200.68	-0.153814	0.0589437	-2.60951	0.0090673	0.0485718
AT5G10450	6693.44	-0.154582	0.0514615	-3.00383	0.00266604	0.018236
AT4G34450	4121.79	-0.155065	0.0471386	-3.28956	0.00100344	0.00822893
AT3G43300	2419.1	-0.160477	0.0566167	-2.83445	0.00459046	0.0282421
AT1G11650	3784.07	-0.161123	0.0565889	-2.84725	0.00440983	0.0273896
AT1G15750	2590.82	-0.16375	0.0629777	-2.60013	0.00931886	0.0496894
AT1G79990	1695.34	-0.163905	0.0587155	-2.79152	0.00524617	0.0312274
AT2G28910	3739.2	-0.164212	0.0587207	-2.79649	0.00516615	0.0309079
AT4G25880	955.769	-0.166376	0.0626342	-2.65631	0.00790013	0.0436211
AT5G43960	969.171	-0.166775	0.0628453	-2.65374	0.00796047	0.0438489
AT5G41770	1000.8	-0.167047	0.0628445	-2.6581	0.00785829	0.0434468
AT5G55180	1172.72	-0.169669	0.0612713	-2.76914	0.00562037	0.0331121
AT1G68790	1121.97	-0.169801	0.0642245	-2.64387	0.00819652	0.0448527
AT5G14210	962.915	-0.171162	0.0658977	-2.59739	0.00939354	0.0499462
AT3G54540	1201.31	-0.173131	0.0555989	-3.11392	0.00184617	0.0134936
AT2G45540	1787.1	-0.173835	0.0665129	-2.61355	0.00896072	0.048075
AT4G02230	2341.69	-0.174273	0.0557718	-3.12474	0.0017796	0.013099
AT2G18440	2523.68	-0.175388	0.0604874	-2.89958	0.00373663	0.0238464
AT5G66420	984.935	-0.175774	0.0624233	-2.81584	0.00486506	0.0295391
AT2G25520	1091.06	-0.177236	0.0657064	-2.6974	0.00698831	0.0394641
AT3G05680	1195.61	-0.17756	0.0598919	-2.96467	0.00303013	0.0201731
AT3G09200	8924.1	-0.177564	0.0683492	-2.59789	0.00937989	0.0499127
AT5G09510	1938.45	-0.179167	0.0619753	-2.89095	0.00384083	0.0243935
AT4G21660	1894.88	-0.179841	0.0638538	-2.81644	0.00485587	0.0294919
AT3G08530	4629.22	-0.181514	0.067932	-2.672	0.00754002	0.0420554
AT2G44160	2465.99	-0.18205	0.0651868	-2.79274	0.0052263	0.0311604
AT5G18630	1147.95	-0.183386	0.0655643	-2.79705	0.0051572	0.0308721
AT1G71820	1232.58	-0.183529	0.0606862	-3.02422	0.00249271	0.0172842
AT1G65010	1452.29	-0.183716	0.0690799	-2.65948	0.00782622	0.0433155
AT4G34670	4109.48	-0.184042	0.0605428	-3.03986	0.00236691	0.0165391
AT3G59020	1479.7	-0.184805	0.0567218	-3.25809	0.00112164	0.00900338
AT2G36850	2162.56	-0.187342	0.0512497	-3.65548	0.000256702	0.00267191
AT5G03540	1081.43	-0.187481	0.0634865	-2.95309	0.00314615	0.0208324
AT3G50500	1452.73	-0.187618	0.0705999	-2.65748	0.00787265	0.0435031
AT1G29340	786.934	-0.187853	0.0663521	-2.83115	0.00463808	0.0284762
AT2G27030	1189.06	-0.188008	0.0594489	-3.16252	0.00156409	0.0118605
AT2G27860	2945.33	-0.188366	0.0717272	-2.62614	0.00863587	0.0467171
AT2G19480	2440.01	-0.189254	0.0638537	-2.96387	0.00303796	0.0202123
AT4G19200	1717.49	-0.19018	0.0644091	-2.95268	0.00315024	0.0208528
AT5G46250	1505.12	-0.190255	0.0656701	-2.89714	0.00376581	0.0239761
AT4G16830	2089.89	-0.190677	0.0623036	-3.06045	0.00221002	0.015611
AT4G19510	833.753	-0.191487	0.066593	-2.87548	0.00403409	0.0254657
AT1G54630	1340.37	-0.192036	0.0662252	-2.89974	0.00373468	0.0238449
AT5G62390	2794.95	-0.192961	0.0711639	-2.7115	0.00669796	0.0381449
AT1G64090	1196.73	-0.193771	0.0681731	-2.84233	0.00447849	0.027704
AT5G18520	1057.73	-0.19427	0.0584664	-3.32276	0.000891327	0.00747123
AT4G00720	1653.94	-0.194633	0.0695507	-2.79844	0.00513503	0.0307747
AT4G31170	916.33	-0.195104	0.0629467	-3.09951	0.00193843	0.0140108
AT5G50960	678.951	-0.19526	0.0706399	-2.76416	0.00570702	0.0335088
AT3G23300	873.285	-0.195915	0.0722168	-2.71287	0.00667032	0.0380395
AT3G61050	1928.96	-0.195953	0.0625663	-3.13192	0.00173665	0.0128601
AT2G46500	693.315	-0.196392	0.0657736	-2.98588	0.00282768	0.0191123
AT3G11130	4257.11	-0.197188	0.0506404	-3.89388	9.86517e-05	0.00117335
AT2G33210	990.793	-0.197248	0.0740147	-2.66498	0.0076992	0.0427829
AT2G40730	1078.99	-0.197783	0.0688484	-2.87274	0.00406932	0.0256492
AT1G54580	1692.39	-0.197862	0.0730249	-2.70952	0.00673815	0.0383005
AT1G01490	1207.95	-0.198105	0.0665424	-2.97713	0.0029096	0.0195078
AT5G08160	641.74	-0.198163	0.0757972	-2.61438	0.00893893	0.0480099
AT4G10790	1216.86	-0.198826	0.061625	-3.22639	0.00125363	0.0098652
AT5G49830	826.628	-0.199154	0.0686855	-2.89951	0.00373752	0.0238464
AT5G21930	2936.48	-0.199979	0.070844	-2.8228	0.00476061	0.0290573
AT1G48090	2023.53	-0.200635	0.0653976	-3.06793	0.00215548	0.0153192
AT1G58440	771.098	-0.200991	0.0747461	-2.68898	0.00716698	0.040326
AT1G63880	1243.49	-0.201038	0.0726704	-2.76643	0.0056673	0.033332
AT5G52560	690.685	-0.20117	0.0771597	-2.60719	0.00912891	0.0488266
AT3G57650	922.853	-0.202847	0.0634971	-3.19458	0.00140033	0.0108476
AT5G26667	1328.33	-0.202941	0.0643477	-3.15382	0.00161148	0.0121403
AT5G47020	1650.67	-0.203751	0.0735466	-2.77037	0.00559922	0.0330061
AT1G18500	1640.3	-0.205376	0.0611773	-3.35706	0.000787762	0.00678041
AT1G52420	589.418	-0.207247	0.0729828	-2.83966	0.00451612	0.0278835
AT5G20000	610.246	-0.207272	0.0792848	-2.61428	0.00894166	0.0480099
AT4G23850	3239.9	-0.207288	0.0719246	-2.88201	0.00395143	0.0250273
AT4G25210	873.209	-0.207634	0.0718422	-2.89015	0.00385064	0.024441
AT1G49240	2816.16	-0.207811	0.0697642	-2.97877	0.0028941	0.0194289
AT3G19540	542.061	-0.20833	0.0786036	-2.65039	0.00803985	0.0441345
AT3G51370	1577.73	-0.208518	0.0657923	-3.16934	0.00152787	0.0116366
AT5G59880	2680.06	-0.208601	0.0532298	-3.91888	8.89624e-05	0.00107032
AT5G42540	1141.01	-0.208696	0.0686835	-3.03852	0.00237741	0.0165909
AT1G69220	778.235	-0.208857	0.0782775	-2.66816	0.00762675	0.0424482
AT2G44120	2676.09	-0.208983	0.0735263	-2.84229	0.00447907	0.027704
AT1G50430	1331.22	-0.209711	0.0665651	-3.15047	0.00163008	0.0122538
[truncated: 1,923 more rows]

## Sheet: 3-Metabolism change under LC 
The Metabolic profiles of A. thaliana after low CO2 treatment
Sample Name	LC-1	LC-2	LC-3	LC-4	LC-5	NC-1	NC-2	NC-3	NC-4	NC-5	padj	FoldChange	log2FoldChange
2-PG	2.67916	1.90244	2.49876	2.21965	2.40077	1.09739	0.983851	1.00821	1.00688	0.903668	9.38521e-06	2.34015	1.2266
Glycerate	1.37984	1.34668	1.22189	1.33178	1.26075	1.07888	1.01627	0.958372	1.05093	0.895541	0.000110908	1.30819	0.387569
Succinate	0.335153	0.335981	0.507108	0.54908	0.646434	1.13647	1.01613	1.00342	1.05422	0.789769	0.000243178	0.474751	-1.07476
GAP/DHAP	0.933603	0.868229	0.789782	0.851792	0.848165	0.974715	0.968833	1.00746	1.04538	1.00361	0.00073725	0.858314	-0.220422
NADPH	0.766959	0.699673	0.863854	0.859411	0.719529	1.09427	0.956073	0.941805	1.05877	0.949085	0.00162705	0.781885	-0.354971
NADP	1.3904	1.11536	1.36559	1.28797	1.59777	1.05647	1.06881	1.04206	0.936785	0.895864	0.0034219	1.35142	0.434474
Glucose 6-phosphate/Glucose 1-phosphate	0.946756	0.800137	0.878467	0.905731	0.888192	1.03734	0.949984	1.03921	0.98139	0.992079	0.00426508	0.883857	-0.178115
Aspartate	0.976963	0.704619	0.837107	0.809088	0.78652	1.02054	0.960424	0.970359	0.985892	1.06279	0.00625786	0.822859	-0.281282
Sucrose	0.801095	0.696431	0.81154	0.850191	0.852352	1.15945	0.966328	1.02967	0.975124	0.869428	0.00725632	0.802322	-0.317747
R5P	0.750052	0.706348	0.784099	0.788673	0.655639	0.900927	0.83745	1.259	1.00211	1.00052	0.00863417	0.736962	-0.440338
Fructose bisphosphatase (FBP)	0.818851	0.771811	0.665612	0.777355	0.874549	1.13564	1.02038	0.863373	0.857373	1.12323	0.0137644	0.781636	-0.355432
Glycine	1.33584	1.16207	1.24409	1.49117	1.21493	0.864911	0.989005	1.27852	0.948371	0.919188	0.0141283	1.28962	0.366947
Glutamate	0.477142	0.559995	0.650683	0.74008	0.712454	1.02567	0.582042	1.24203	1.00563	1.14463	0.0164495	0.628071	-0.671001
Fructose-6-phosphate(F6P)	0.951209	0.849159	0.942402	0.929034	0.947097	0.984632	0.944153	1.05937	1.01551	0.996336	0.0217014	0.92378	-0.114379
Fumarat	0.795831	0.728729	0.840421	0.849657	0.840412	1.22246	0.976953	0.921096	1.04988	0.82961	0.0270749	0.81101	-0.302209
Alanine	0.980682	0.683855	0.863901	0.884677	0.741942	0.978787	0.918342	0.955552	1.131	1.01632	0.0301039	0.831011	-0.26706
Glycolate	1.40081	1.10572	1.22786	1.26707	1.20546	0.959801	0.856619	0.993962	1.31614	0.87348	0.0360441	1.24138	0.311949
FAD	1.20994	1.04126	1.10143	1.08457	1.06582	0.990993	0.899181	1.04709	1.05515	1.00759	0.0372034	1.1006	0.138293
ATP	0.958493	0.768783	0.938059	0.915047	0.942801	1.03574	0.94857	1.0192	0.964844	1.03165	0.0406073	0.904637	-0.14459
DPGA	0.976126	1.26814	1.1892	1.3308	1.03046	0.991024	1.02492	0.94469	0.979276	1.06009	0.0548541	1.15894	0.212811
RuBP	1.12861	1.2907	1.19041	0.899925	1.42672	0.822264	1.1616	0.985047	1.09923	0.931863	0.116464	1.18727	0.247653
Glutamine	0.960406	0.57529	0.865933	0.917784	0.826134	1.14071	0.890911	1.2021	0.888777	0.877502	0.11831	0.829109	-0.270366
Glyoxylate	0.989907	1.05318	1.19191	1.16439	1.15983	1.13894	1.10067	0.872589	0.942773	0.945025	0.118355	1.11184	0.152953
Citrate	0.907278	1.13686	0.55222	0.609873	0.595028	0.744582	0.84045	1.13856	1.09738	1.17902	0.131779	0.760252	-0.395451
Malate	1.142	1.09078	0.917815	1.18459	1.0986	1.04591	0.984679	0.906188	0.989674	1.07355	0.145776	1.08676	0.120029
Glucose	1.77578	0.916878	0.929563	1.3153	1.20892	0.990098	0.706853	1.21707	1.27081	0.81517	0.265782	1.22929	0.297824
AMP	1.05029	1.20627	1.24013	0.791921	1.65827	0.985566	0.813564	1.28809	0.912349	1.00043	0.2764	1.18938	0.250205
ADP	1.06754	0.895769	1.09923	1.10987	1.23704	1.06297	0.970903	1.1387	0.897161	0.930275	0.279091	1.08189	0.11355
Serine	0.827905	1.19043	1.05832	1.22188	1.13489	1.07111	0.939412	1.06999	1.00182	0.917665	0.294715	1.08669	0.119935
OAA	1.01019	1.48808	0.99964	1.16816	1.00805	1.18332	1.18897	0.85884	0.932656	0.836214	0.300252	1.13482	0.182468
Hydroxypyruvate (HPYR)	0.860503	0.931664	0.948347	1.02781	0.965352	0.96657	0.92009	0.989968	1.15989	0.963478	0.313655	0.946734	-0.0789686
ADPG	1.08262	0.592832	0.812841	0.865332	0.818643	1.22514	0.818377	1.43948	0.841576	0.675434	0.338473	0.834454	-0.261095
Sedoeheptulose-7-phosphate (S7P)	1.09793	1.07011	1.14773	0.978899	1.06851	1.1599	0.958163	1.14732	0.908208	0.826406	0.340362	1.07264	0.101162
NAD	1.52422	1.08498	1.13313	1.06919	0.812725	0.879838	0.928664	0.958921	1.19306	1.03951	0.353762	1.12485	0.169731
Cysteine	1.0382	1.22921	0.797359	1.98505	0.984227	1.101	0.835751	0.984744	1.13372	0.944784	0.360707	1.20681	0.271197
NADH	1.03721	0.999785	0.986626	0.971743	0.672214	0.973086	0.909904	1.02312	1.11563	0.978264	0.39806	0.933516	-0.0992533
uridine diphosphate glucose (UDPG)	1.02528	0.781101	0.987157	0.978516	1.01008	0.953362	0.907765	1.09331	0.94683	1.09873	0.487685	0.956427	-0.0642737
Phosphoglycerate (PGA)	1.08744	0.722075	0.937462	0.997406	1.01045	1.10672	1.06103	1.18114	0.832295	0.818815	0.62464	0.950966	-0.0725349
Erythrose-4-phosphate (E4P)	1.02445	0.851517	0.977711	0.938999	1.07305	1.0136	1.05372	1.08447	0.850987	0.997229	0.639877	0.973147	-0.0392702
PEP	1.08235	0.872676	0.823733	1.10645	0.997395	1.07685	0.960751	1.12668	0.993564	0.842148	0.760821	0.976522	-0.034275
Pyruvate	0.927978	1.05185	0.838994	1.0541	0.906994	1.27566	1.3893	0.753086	0.819032	0.762921	0.767232	0.955983	-0.0649427
Fructose	1.12313	0.65251	1.27273	0.649549	0.855091	0.662835	1.57639	0.175531	1.86213	0.723118	0.796996	0.910602	-0.135108
2-OG	0.826542	1.01027	1.07488	0.997352	0.944671	1.17707	0.716882	1.28761	0.648129	1.17032	0.837563	0.970743	-0.0428382
6PG	0.981629	1.05973	0.902601	1.05134	1.02289	1.02835	1.16706	1.00352	0.807754	0.993328	0.956151	1.00364	0.00523792

## Sheet: 4-C4 related genes 
LC/NC	GeneID	baseMean	log2FoldChange	lfcSE	stat	pvalue	padj		NH4+/GM	Gene	baseMean	log2FoldChange	lfcSE	stat	pvalue	padj
AAT	AT2G22250	441.091	0.442149	0.0930782	-4.7503	2.03116e-06	2.58323e-05		AAT	AT2G22250	445.136	-0.117073	0.0941045	-1.24407	0.213472	0.447159
AlaAT1	AT1G17290	3267.97	0.503628	0.121124	-4.15796	3.21101e-05	0.000289756		AlaAT1	AT1G17290	2029.18	0.19509	0.0622221	3.13538	0.00171633	0.0127295
AspAT1	AT2G30970	1183.54	-0.0691541	0.12215	0.566141	0.571298	0.728145		AspAT1	AT2G30970	1361.63	0.0309893	0.0774895	0.399916	0.689219	0.847057
AspAT2	AT5G19550	1075.03	0.25806	0.105305	-2.45059	0.0142622	0.0489863		AspAT2	AT5G19550	817.133	-0.132033	0.0970548	-1.36039	0.173706	0.393829
AspAT3	AT5G11520	785.005	-0.024066	0.0931651	0.258316	0.796163	0.885913		AspAT3	AT5G11520	1225.46	0.155128	0.0824423	1.88165	0.059883	0.194915
AspAT4	AT1G62800	198.401	-1.0188	0.217249	4.68955	2.73802e-06	3.35876e-05		AspAT4	AT1G62800	270.823	0.734614	0.132446	5.5465	2.91444e-08	8.36518e-07
AspAT5	AT4G31990	2883.89	0.240612	0.0957995	-2.51162	0.0120179	0.0427333		AspAT5	AT4G31990	3065.49	0.205426	0.0465167	4.41619	1.00457e-05	0.000158106
BASS1	AT1G78560	592.066	-0.166651	0.105626	1.57774	0.114625	0.243975		BASS1	AT1G78560	661.328	0.0834615	0.0801549	1.04125	0.297759	0.544319
BASS2	AT2G26900	4437.78	-0.0123768	0.0784874	0.157691	0.8747	0.931908		BASS2	AT2G26900	3986.93	-0.0743157	0.0534528	-1.3903	0.164437	0.380792
BASS4	AT3G56160	2019.15	0.252302	0.135436	-1.86289	0.0624784	0.156091		BASS4	AT3G56160	1405.14	0.221802	0.0769911	2.88088	0.00396567	0.0250926
BASS6	AT4G22840	198.033	-0.189784	0.165856	1.14427	0.25251	0.429059		BASS6	AT4G22840	95.1514	-0.291918	0.211778	-1.37842	0.168075	0.385848
CA1	AT3G01500	159943	0.034305	0.0993464	-0.345307	0.729863	0.844731		CA1	AT3G01500	62468.3	0.325746	0.0844975	3.8551	0.000115683	0.0013402	up
CA2	AT5G14740	57450.6	0.201372	0.0701541	-2.87042	0.00409924	0.0178107	up	CA2	AT5G14740	24422.6	0.332926	0.0790518	4.21149	2.53691e-05	0.000359865	up
CA3	AT1G23730	28.2784	-0.0833053	0.328649	0.253478	0.799899	0.888114		CA3	AT1G23730	92.9808	-0.300722	0.241118	-1.2472	0.212324	0.445919
CA4	AT1G70410	5024.93	0.34768	0.0905886	-3.83801	0.000124035	0.000933007	up	CA4	AT1G70410	3489.24	-0.115769	0.0827932	-1.39829	0.162026	0.377638
CA5	AT4G33580	1303.23	0.39118	0.0894156	-4.37485	1.21515e-05	0.000124677	up	CA5	AT4G33580	1036.46	-0.0419656	0.0740943	-0.566381	0.571135	0.77201
CA6	AT1G58180	414.015	-0.342991	0.249707	1.37357	0.169574	0.323387		CA6	AT1G58180	528.733	-0.193774	0.10595	-1.82892	0.0674119	0.211238
cNAD-MDH1	AT1G04410	9287.83	0.0417313	0.088191	-0.473193	0.636076	0.779471		cNAD-MDH1	AT1G04410	11201.4	0.338883	0.0478622	7.08038	1.43755e-12	8.0961e-11
cNAD-MDH2	AT5G43330	457.932	-0.288123	0.131617	2.18911	0.028589	0.0851519		cNAD-MDH2	AT5G43330	438.252	0.266477	0.139592	1.90897	0.0562654	0.1864
DIC	AT2G22500	179.047	0.650505	0.209436	-3.10598	0.00189651	0.00944914		DIC	AT2G22500	224.339	-0.0686674	0.188918	-0.363477	0.716249	0.862053
DIC2	AT4G24570	42.0101	1.56685	0.306329	-5.11493	3.13852e-07	5.03091e-06		DIC2	AT4G24570	118.169	-1.19774	0.520294	-2.30205	0.0213323	0.0929382
DiT1	AT5G12860	10492.7	0.446909	0.11607	-3.85034	0.000117954	0.000895997		DiT1	AT5G12860	7889.56	0.264445	0.0510004	5.18516	2.15834e-07	5.14593e-06
DiT2.1	AT5G64290	2905.43	0.532733	0.105638	-5.04302	4.58245e-07	6.99354e-06		DiT2.1	AT5G64290	2706.26	-0.21965	0.0571398	-3.84409	0.000121001	0.00139459
DiT2.2	AT5G64280	678.765	-0.129541	0.101312	1.27863	0.201028	0.365052		DiT2.2	AT5G64280	420.347	0.0351917	0.0894702	0.393334	0.694072	0.849883
MEP1	AT1G32080	10340.4	0.0495729	0.117757	-0.420977	0.673772	0.80699		MEP1	AT1G32080	5732.36	0.211509	0.0794782	2.66122	0.00778575	0.0431488
MEP2	AT5G23890	1935.03	0.420016	0.102444	-4.09997	4.13201e-05	0.000361804		MEP2	AT5G23890	1934.95	0.251767	0.0509517	4.94129	7.76066e-07	1.62203e-05
MEP3-4	AT5G12470	3717.24	0.55385	0.1377	-4.02214	5.76722e-05	0.000482059		MEP3-4	AT5G12470	2917.67	-0.14009	0.063697	-2.19932	0.0278549	0.112882
mtNAD-MDH1	AT1G53240	7277.42	0.378802	0.116861	-3.24147	0.00118913	0.00640489		mtNAD-MDH1	AT1G53240	4997.75	0.28599	0.0484818	5.89892	3.65886e-09	1.2665e-07
NAD-ME1	AT2G13560	2637.49	0.0501004	0.0586444	-0.854307	0.392935	0.576828		NAD-ME1	AT2G13560	2728.71	-0.115175	0.0527571	-2.18311	0.0290274	0.116479
NAD-ME2	AT4G00570	1091.85	0.143005	0.084364	-1.6951	0.0900572	0.205055		NAD-ME2	AT4G00570	1395.05	0.0726493	0.0598216	1.21443	0.224582	0.462064
NADP-MDH	AT5G58330	10781	0.157027	0.0840259	-1.86879	0.0616515	0.154419		NADP-MDH	AT5G58330	7098.52	0.526305	0.0698155	7.53851	4.75355e-14	3.30182e-12
NADP-ME2	AT5G11670	3738.48	-0.290043	0.165704	1.75037	0.0800549	0.187558		NADP-ME2	AT5G11670	3105.73	-0.322744	0.107967	-2.98927	0.00279643	0.0189441
NADP-ME4	AT1G79750	2945.24	0.150047	0.0791268	-1.89629	0.0579214	0.147142		NADP-ME4	AT1G79750	3538.85	0.116162	0.0497089	2.33686	0.0194467	0.0868103
NHD1	AT3G19490	992.957	-0.196714	0.0799267	2.46118	0.013848	0.0478339		NHD1	AT3G19490	1023.73	0.191021	0.073592	2.59567	0.00944068	0.0501338
PEPC1	AT1G53310	1778.31	0.238393	0.0896188	-2.66008	0.00781232	0.0302792	up	PEPC1	AT1G53310	1666.31	-0.00843055	0.0829692	-0.101611	0.919066	0.966533
PEPC2	AT2G42600	11263.2	0.616888	0.0767341	-8.03929	9.03611e-16	7.74982e-14	up	PEPC2	AT2G42600	8180.66	-0.666653	0.0818736	-8.14247	3.87306e-16	3.53977e-14	down
PEPC3	AT3G14940	228.111	0.407604	0.180661	-2.25619	0.024059	0.0745585	up	PEPC3	AT3G14940	779.51	0.474882	0.399786	1.18784	0.234897	0.474926
PEP-CK1	AT4G37870	1853.71	-0.433037	0.0906852	4.77517	1.79556e-06	2.32035e-05		PEP-CK1	AT4G37870	4253.9	0.107452	0.0687838	1.56217	0.118247	0.309474
pNAD-MDH	AT3G47520	1565.32	0.477054	0.137974	-3.45757	0.000545071	0.00331385		pNAD-MDH	AT3G47520	1554.52	0.189118	0.0552121	3.42529	0.000614135	0.00552324
PPA2	AT2G18230	606.444	1.08077	0.195834	-5.5188	3.41314e-08	6.89811e-07		PPA2	AT2G18230	279.034	0.324345	0.119209	2.72081	0.00651229	0.0372606
PPA6	AT5G09650	4339.11	-0.11892	0.12233	0.972122	0.33099	0.516334		PPA6	AT5G09650	5194.41	0.115764	0.057244	2.02229	0.0431467	0.154642
PPCK1	AT1G08650	247.981	0.691899	0.175258	-3.94788	7.88459e-05	0.000632184		PPCK1	AT1G08650	301.954	-1.74879	0.114592	-15.261	1.39059e-52	1.70453e-49
PPCK2	AT3G04530	0.12782	-0.0309084	0.156635	0.197328	0.843571	NA		PPCK2	AT3G04530	13.1635	1.5559	0.491207	3.1675	0.00153756	0.0116933
PPDK	AT4G15530	4452.65	0.34827	0.221209	-1.57439	0.115397	0.245017		PPDK	AT4G15530	978.696	0.0652332	0.159441	0.409138	0.682439	0.842262
PPDK-RP1	AT4G21210	5100.77	0.334278	0.0994909	-3.35988	0.000779753	0.00449164		PPDK-RP1	AT4G21210	2558.4	0.0832639	0.0660958	1.25975	0.207761	0.439838
PPT1	AT5G33320	2364.67	0.300437	0.0766171	-3.92127	8.80827e-05	0.000696906		PPT1	AT5G33320	2327.59	0.172196	0.053441	3.22217	0.00127224	0.0099928
PPT2	AT3G01550	1384.42	0.814106	0.119591	-6.80739	9.93824e-12	4.13798e-10		PPT2	AT3G01550	646.185	0.206226	0.123399	1.67121	0.0946803	0.267192
TPT	AT5G46110	44878	0.117532	0.061179	-1.92112	0.0547168	0.140964		TPT	AT5G46110	29246.4	0.137452	0.0778236	1.7662	0.077363	0.231789
AMK2	AT5G47840	2709.02	0.140493	0.0778805	-1.80396	0.071238	0.172086		AMK2	AT5G47840	2327.66	0.106749	0.0676632	1.57765	0.114646	0.303096

## Sheet: Sheet1
LC/NC	GeneID	baseMean	log2FoldChange	lfcSE	stat	pvalue	padj		NH4+/GM	Gene	baseMean	log2FoldChange	lfcSE	stat	pvalue	padj
AAT	AT2G22250	441.091	0.442149	0.0930782	-4.7503	2.03116e-06	2.58323e-05		AAT	AT2G22250	445.136	-0.117073	0.0941045	-1.24407	0.213472	0.447159
AlaAT1	AT1G17290	3267.97	0.503628	0.121124	-4.15796	3.21101e-05	0.000289756		AlaAT1	AT1G17290	2029.18	0.19509	0.0622221	3.13538	0.00171633	0.0127295
AspAT1	AT2G30970	1183.54	-0.0691541	0.12215	0.566141	0.571298	0.728145		AspAT1	AT2G30970	1361.63	0.0309893	0.0774895	0.399916	0.689219	0.847057
AspAT2	AT5G19550	1075.03	0.25806	0.105305	-2.45059	0.0142622	0.0489863		AspAT2	AT5G19550	817.133	-0.132033	0.0970548	-1.36039	0.173706	0.393829
AspAT3	AT5G11520	785.005	-0.024066	0.0931651	0.258316	0.796163	0.885913		AspAT3	AT5G11520	1225.46	0.155128	0.0824423	1.88165	0.059883	0.194915
AspAT4	AT1G62800	198.401	-1.0188	0.217249	4.68955	2.73802e-06	3.35876e-05		AspAT4	AT1G62800	270.823	0.734614	0.132446	5.5465	2.91444e-08	8.36518e-07
AspAT5	AT4G31990	2883.89	0.240612	0.0957995	-2.51162	0.0120179	0.0427333		AspAT5	AT4G31990	3065.49	0.205426	0.0465167	4.41619	1.00457e-05	0.000158106
BASS1	AT1G78560	592.066	-0.166651	0.105626	1.57774	0.114625	0.243975		BASS1	AT1G78560	661.328	0.0834615	0.0801549	1.04125	0.297759	0.544319
BASS2	AT2G26900	4437.78	-0.0123768	0.0784874	0.157691	0.8747	0.931908		BASS2	AT2G26900	3986.93	-0.0743157	0.0534528	-1.3903	0.164437	0.380792
BASS4	AT3G56160	2019.15	0.252302	0.135436	-1.86289	0.0624784	0.156091		BASS4	AT3G56160	1405.14	0.221802	0.0769911	2.88088	0.00396567	0.0250926
BASS6	AT4G22840	198.033	-0.189784	0.165856	1.14427	0.25251	0.429059		BASS6	AT4G22840	95.1514	-0.291918	0.211778	-1.37842	0.168075	0.385848
DIC	AT2G22500	179.047	0.650505	0.209436	-3.10598	0.00189651	0.00944914		DIC	AT2G22500	224.339	-0.0686674	0.188918	-0.363477	0.716249	0.862053
DIC2	AT4G24570	42.0101	1.56685	0.306329	-5.11493	3.13852e-07	5.03091e-06		DIC2	AT4G24570	118.169	-1.19774	0.520294	-2.30205	0.0213323	0.0929382
DiT1	AT5G12860	10492.7	0.446909	0.11607	-3.85034	0.000117954	0.000895997		DiT1	AT5G12860	7889.56	0.264445	0.0510004	5.18516	2.15834e-07	5.14593e-06
DiT2.1	AT5G64290	2905.43	0.532733	0.105638	-5.04302	4.58245e-07	6.99354e-06		DiT2.1	AT5G64290	2706.26	-0.21965	0.0571398	-3.84409	0.000121001	0.00139459
DiT2.2	AT5G64280	678.765	-0.129541	0.101312	1.27863	0.201028	0.365052		DiT2.2	AT5G64280	420.347	0.0351917	0.0894702	0.393334	0.694072	0.849883
MEP1	AT1G32080	10340.4	0.0495729	0.117757	-0.420977	0.673772	0.80699		MEP1	AT1G32080	5732.36	0.211509	0.0794782	2.66122	0.00778575	0.0431488
MEP2	AT5G23890	1935.03	0.420016	0.102444	-4.09997	4.13201e-05	0.000361804		MEP2	AT5G23890	1934.95	0.251767	0.0509517	4.94129	7.76066e-07	1.62203e-05
MEP3-4	AT5G12470	3717.24	0.55385	0.1377	-4.02214	5.76722e-05	0.000482059		MEP3-4	AT5G12470	2917.67	-0.14009	0.063697	-2.19932	0.0278549	0.112882
NHD1	AT3G19490	992.957	-0.196714	0.0799267	2.46118	0.013848	0.0478339		NHD1	AT3G19490	1023.73	0.191021	0.073592	2.59567	0.00944068	0.0501338
PIP1	AT3G61430	6650.35	0.381422	0.0972266	-3.92302	8.74454e-05	0.000692558		PIP1	AT3G61430	5015.66	-0.211769	0.0860928	-2.45978	0.0139023	0.0671368
pNAD-MDH	AT3G47520	1565.32	0.477054	0.137974	-3.45757	0.000545071	0.00331385		pNAD-MDH	AT3G47520	1554.52	0.189118	0.0552121	3.42529	0.000614135	0.00552324
PPA2	AT2G18230	606.444	1.08077	0.195834	-5.5188	3.41314e-08	6.89811e-07		PPA2	AT2G18230	279.034	0.324345	0.119209	2.72081	0.00651229	0.0372606
PPA6	AT5G09650	4339.11	-0.11892	0.12233	0.972122	0.33099	0.516334		PPA6	AT5G09650	5194.41	0.115764	0.057244	2.02229	0.0431467	0.154642
PPCK1	AT1G08650	247.981	0.691899	0.175258	-3.94788	7.88459e-05	0.000632184		PPCK1	AT1G08650	301.954	-1.74879	0.114592	-15.261	1.39059e-52	1.70453e-49
PPCK2	AT3G04530	0.12782	-0.0309084	0.156635	0.197328	0.843571	NA		PPCK2	AT3G04530	13.1635	1.5559	0.491207	3.1675	0.00153756	0.0116933
PPDK	AT4G15530	4452.65	0.34827	0.221209	-1.57439	0.115397	0.245017		PPDK	AT4G15530	978.696	0.0652332	0.159441	0.409138	0.682439	0.842262
PPDK-RP1	AT4G21210	5100.77	0.334278	0.0994909	-3.35988	0.000779753	0.00449164		PPDK-RP1	AT4G21210	2558.4	0.0832639	0.0660958	1.25975	0.207761	0.439838
PPT1	AT5G33320	2364.67	0.300437	0.0766171	-3.92127	8.80827e-05	0.000696906		PPT1	AT5G33320	2327.59	0.172196	0.053441	3.22217	0.00127224	0.0099928
PPT2	AT3G01550	1384.42	0.814106	0.119591	-6.80739	9.93824e-12	4.13798e-10		PPT2	AT3G01550	646.185	0.206226	0.123399	1.67121	0.0946803	0.267192

## Sheet: 5-Ammonia recycling pathway
LC/NC	GeneID	baseMean	log2FoldChange	lfcSE	stat	pvalue	padj		NH4+/GM	Gene	baseMean	log2FoldChange	lfcSE	stat	pvalue	padj
FD-GOGAT	AT5G04140	60094.2	0.284044	0.104141	-2.7275	0.0063816	0.0256196		FD-GOGAT	AT5G04140	28771.3	0.332078	0.0867497	3.828	0.00012919	0.00147426
GDH1	AT5G18170	844.095	-1.61185	0.187446	8.59902	8.03969e-18	9.89868e-16		GDH1	AT5G18170	1315.18	0.471622	0.10877	4.33596	1.45124e-05	0.000219296
GLN1:1	AT5G37600	1290.94	0.574175	0.151788	-3.78274	0.000155112	0.0011328		GLN1;1	AT5G37600	1453.17	-1.48948	0.135233	-11.0142	3.2646e-28	8.7215e-26
GLT1	AT5G53460	5714.35	-0.452415	0.140754	3.21423	0.00130796	0.00693091		GLT1	AT5G53460	9847.14	0.759071	0.0764053	9.9348	2.93762e-23	5.51479e-21
GS2	AT5G35630	44878.5	0.0396079	0.0941455	-0.420709	0.673967	0.807085		GS2	AT5G35630	41989.8	0.365572	0.0791379	4.61943	3.84794e-06	6.78517e-05
NIA1	AT1G77760	2418.63	0.869336	0.18792	-4.6261	3.7262e-06	4.43394e-05		NIA1	AT1G77760	5124.06	1.8166	0.278952	6.51221	7.40521e-11	3.34729e-09
NIA2	AT1G37130	9457.79	0.0928414	0.161709	-0.574127	0.565882	0.723909		NIA2	AT1G37130	14021.2	0.453401	0.0976419	4.6435	3.42552e-06	6.13766e-05
GLN1.3	AT3G17820	206.395	-0.0480917	0.179435	0.268017	0.788686	0.88179		GLN1.3	AT3G17820	967.479	-0.137432	0.0977866	-1.40543	0.159895	0.375029
GDH3	AT3G03910	86.4435	-0.0350932	0.242696	0.144597	0.885029	0.938082		GDH3	AT3G03910	16.0963	-1.76779	0.419117	-4.21789	2.46599e-05	0.000350999

## Sheet: 6-Photorespiration pathway
LC/NC	GeneID	baseMean	log2FoldChange	lfcSE	stat	pvalue	padj		NH4+/GM	Gene	baseMean	log2FoldChange	lfcSE	stat	pvalue	padj
AGT	AT2G13360	53870.3	0.510805	0.112713	-4.53189	5.8459e-06	6.55426e-05		AGT	AT2G13360	32247.3	0.116703	0.116818	0.999019	0.317786	0.564441
AGT3	AT2G38400	288.344	-0.14902	0.259947	0.573269	0.566463	0.724421		AGT3	AT2G38400	574.469	0.413502	0.131428	3.14622	0.00165394	0.0123673
AOAT2	AT1G70580	5811.76	1.53585	0.161932	-9.48455	2.4344e-21	5.31044e-19		AOAT2	AT1G70580	1365.48	0.242594	0.115528	2.09987	0.0357404	0.135493
BOU	AT5G46800	3295.86	0.90579	0.127066	-7.12852	1.01452e-12	5.09012e-11		BOU	AT5G46800	1833.87	0.338567	0.116681	2.90164	0.00371216	0.023742
FD-GOGAT	AT5G04140	60094.2	0.284044	0.104141	-2.7275	0.0063816	0.0256196		FD-GOGAT	AT5G04140	28771.3	0.332078	0.0867497	3.828	0.00012919	0.00147426
GDC-H1	AT1G32470	8314.44	0.1276	0.0998711	-1.27765	0.201374	0.365305		GDC-H1	AT1G32470	7668.85	0.381978	0.0892614	4.27932	1.87467e-05	0.000275684
GDC-L1	AT1G48030	9753.46	-0.213974	0.100819	2.12237	0.0338068	0.0972437		GDC-L1	AT1G48030	5854.78	0.233384	0.0738802	3.15895	0.00158336	0.0119761
GDC-L2	AT3G16950	332.88	0.53407	0.173464	-3.07886	0.00207796	0.0101714		GDC-L2	AT3G16950	840.664	-0.096476	0.0808502	-1.19327	0.232764	0.472237
GDC-L4	AT4G16155	1870.55	0.368098	0.133073	-2.76613	0.00567252	0.023252		GDC-L4	AT4G16155	1763.39	0.117915	0.0728281	1.61909	0.105428	0.286678
GDC-P1	AT4G33010	114145	0.639319	0.169432	-3.77332	0.000161092	0.00117051		GDC-P1	AT4G33010	31258.2	0.211239	0.1104	1.91339	0.0556983	0.185228
GDC-P2	AT2G26080	23947.6	0.647757	0.152526	-4.24685	2.16795e-05	0.000207877		GDC-P2	AT2G26080	11333.7	-0.0537165	0.107219	-0.500995	0.616374	0.800998
GDC-T	AT1G11860	29681.5	0.0943296	0.0890891	-1.05882	0.28968	0.473092		GDC-T	AT1G11860	23636.6	0.421345	0.0799716	5.26868	1.37408e-07	3.44149e-06
GDH1	AT5G18170	844.095	-1.61185	0.187446	8.59902	8.03969e-18	9.89868e-16		GDH1	AT5G18170	1315.18	0.471622	0.10877	4.33596	1.45124e-05	0.000219296
GDH2	AT5G07440	381.271	-0.299153	0.131758	2.27047	0.0231791	0.0724469		GDH2	AT5G07440	2075.86	1.35691	0.142578	9.51698	1.78286e-21	2.87995e-19
GGT1	AT1G23310	66508.6	0.177905	0.0993188	-1.79125	0.0732529	0.175767		GGT1	AT1G23310	32735.6	0.403054	0.0971409	4.14916	3.33694e-05	0.000458372
GLN1;1	AT5G37600	1290.94	0.574175	0.151788	-3.78274	0.000155112	0.0011328		GLN1;1	AT5G37600	1453.17	-1.48948	0.135233	-11.0142	3.2646e-28	8.7215e-26
GLT1	AT5G53460	5714.35	-0.452415	0.140754	3.21423	0.00130796	0.00693091		GLT1	AT5G53460	9847.14	0.759071	0.0764053	9.9348	2.93762e-23	5.51479e-21
GOX1	AT3G14420	49310.7	0.152761	0.105776	-1.4442	0.148684	0.294564		GOX1	AT3G14420	23785.8	0.498064	0.0993332	5.01408	5.3288e-07	1.16911e-05
GOX2	AT3G14415	23511.2	0.235906	0.0815844	-2.89155	0.00383341	0.0168786		GOX2	AT3G14415	14047.5	0.12639	0.0888468	1.42256	0.154864	0.367212
GS2	AT5G35630	44878.5	0.0396079	0.0941455	-0.420709	0.673967	0.807085		GS2	AT5G35630	41989.8	0.365572	0.0791379	4.61943	3.84794e-06	6.78517e-05
HAOX2	AT3G14150	371.5	-0.916012	0.163015	5.61918	1.91871e-08	4.10956e-07		HAOX2	AT3G14150	594.089	-0.0501508	0.0891345	-0.562642	0.573679	0.773642
HPR1	AT1G68010	33702.2	0.152806	0.104086	-1.46808	0.142083	0.284463		HPR1	AT1G68010	15986.9	0.41999	0.114417	3.67071	0.000241876	0.00253787
HPR2	AT1G79870	1154.86	0.0393744	0.0923894	-0.426179	0.669978	0.804383		HPR2	AT1G79870	1056.2	0.301723	0.0660889	4.5654	4.98533e-06	8.50117e-05
NIA1	AT1G77760	2418.63	0.869336	0.18792	-4.6261	3.7262e-06	4.43394e-05		NIA1	AT1G77760	5124.06	1.8166	0.278952	6.51221	7.40521e-11	3.34729e-09
NIA2	AT1G37130	9457.79	0.0928414	0.161709	-0.574127	0.565882	0.723909		NIA2	AT1G37130	14021.2	0.453401	0.0976419	4.6435	3.42552e-06	6.13766e-05
PGLP1	AT5G36700	31.762	-0.739684	0.302275	2.44706	0.0144027	0.0493931		PGLP1	AT5G36700	36.1768	0.561191	0.310389	1.80802	0.0706028	0.218007
PGLP2	AT5G47760	252.46	-0.521654	0.123723	4.21631	2.48329e-05	0.000233102		PGLP2	AT5G47760	320.095	0.201504	0.0954405	2.11131	0.0347456	0.132923
RBCS1A	AT1G67090	331084	0.26094	0.113302	-2.30305	0.021276	0.0676363		RBCS1A	AT1G67090	264515	0.280511	0.0812396	3.45288	0.000554628	0.00506901
SHM1	AT4G37930	71586.5	0.0401074	0.082278	-0.487463	0.62593	0.771183		SHM1	AT4G37930	37543.2	0.294493	0.0987505	2.98219	0.0028619	0.019281
SHM2	AT5G26780	891.528	0.244803	0.0840453	-2.91276	0.00358255	0.0159382		SHM2	AT5G26780	813.835	-0.018032	0.0783333	-0.230195	0.81794	0.918405
SHM3	AT4G32520	1320.12	0.306861	0.105624	-2.90521	0.00367003	0.0162484		SHM3	AT4G32520	1253.95	0.119734	0.0726007	1.64922	0.0991028	0.275346
SHM4	AT4G13930	3443.69	0.777179	0.102749	-7.56387	3.91252e-14	2.47698e-12		SHM4	AT4G13930	3035.33	-0.0394117	0.0710199	-0.554938	0.578937	0.776625
GDC-H2	AT2G35120	176.293	-0.262094	0.143487	1.8266	0.0677602	0.165819		GDC-H2	AT2G35120	687.516	-0.265364	0.126377	-2.09979	0.0357475	0.135493
AGT2	AT4G39660	477.192	-0.151671	0.115999	1.30752	0.191038	0.351879		AGT2	AT4G39660	638.218	-0.17983	0.0940126	-1.91282	0.0557705	0.18538
RBCS2B	AT5G38420	116131	-0.138993	0.104585	1.32899	0.183851	0.342655		RBCS2B	AT5G38420	55322.5	-0.168204	0.107645	-1.56259	0.11815	0.309337
GLN1.3	AT3G17820	206.395	-0.0480917	0.179435	0.268017	0.788686	0.88179		GLN1.3	AT3G17820	967.479	-0.137432	0.0977866	-1.40543	0.159895	0.375029
GLYK	AT1G80380	6725.74	0.0355759	0.087976	-0.404383	0.685931	0.815133		GLYK	AT1G80380	5255.92	0.0812337	0.0724382	1.12142	0.262109	0.505351
GOX3	AT4G18360	3.1329	-0.684223	0.377541	1.81231	0.0699378	0.169781		GOX3	AT4G18360	91.153	0.371586	0.342912	1.08362	0.278534	0.523032
RBCS3B	AT5G38410	196891	-0.148276	0.118452	1.25178	0.210649	0.376817		RBCS3B	AT5G38410	147937	-0.0979448	0.0984587	-0.994781	0.319843	0.566405
SHM7	AT1G36370	549.591	-0.27096	0.124498	2.17643	0.0295235	0.0873518		SHM7	AT1G36370	668.653	-0.209205	0.293807	-0.712049	0.476434	0.702714
GDC-L3	AT3G17240	760.734	0.0778077	0.119827	-0.649332	0.516124	0.685001		GDC-L3	AT3G17240	1262.8	0.0497895	0.0748572	0.665127	0.505969	0.724883
RBCS1B	AT5G38430	38818.8	-0.0893224	0.140002	0.638006	0.52347	0.689745		RBCS1B	AT5G38430	25861.2	-0.0404952	0.117867	-0.343568	0.731171	0.870585
HAOX1	AT3G14130	85.2609	-0.379095	0.20611	1.83929	0.0658728	0.162508		HAOX1	AT3G14130	115.619	-0.0401786	0.155498	-0.258387	0.796108	0.906778
SHM6	AT1G22020	489.852	0.156559	0.0976917	-1.60258	0.109027	0.235453		SHM6	AT1G22020	419.174	-0.0155036	0.0886814	-0.174824	0.861218	0.940057
HPR3	AT1G12550	135.058	0.182888	0.145831	-1.25411	0.209801	0.37584		HPR3	AT1G12550	89.7803	0.00609698	0.176246	0.0345936	0.972404	0.989471

## Sheet: 7-TCA cycle
LC/NC	GeneID	baseMean	log2FoldChange	lfcSE	stat	pvalue	padj		NH4+/GM	Gene	baseMean	log2FoldChange	lfcSE	stat	pvalue	padj
mMDH1	AT1G53240	7277.42	0.378802	0.116861	-3.24147	0.00118913	0.00640489		mMDH1	AT1G53240	4997.75	0.28599	0.0484818	5.89892	3.65886e-09	1.2665e-07
ACLA-1	AT1G10670	3034.94	0.0790458	0.0864779	-0.914057	0.360687	0.546028		ACLA-1	AT1G10670	3825.85	-0.140865	0.0459009	-3.0689	0.00214847	0.015285
ACLA-3	AT1G09430	794.29	-0.572834	0.130087	4.40348	1.06528e-05	0.000110888		ACLA-3	AT1G09430	1221.5	-0.42838	0.0746556	-5.73808	9.57555e-09	3.051e-07
ACLB-1	AT3G06650	2355.21	0.527619	0.0830352	-6.35415	2.09576e-10	6.88883e-09		ACLB-1	AT3G06650	2717.34	0.0160543	0.0645102	0.248864	0.803466	0.911495
ACLB-2	AT5G49460	777.492	0.410298	0.0796089	-5.15392	2.55096e-07	4.18946e-06		ACLB-2	AT5G49460	1546.51	0.0410619	0.0567208	0.72393	0.469109	0.697587
ACO1	AT4G35830	11828.2	0.391604	0.0995757	-3.93273	8.39879e-05	0.00066887		ACO1	AT4G35830	8616.7	0.124469	0.0744531	1.67178	0.0945679	0.267151
cICDH	AT1G65930	4034.82	-0.595075	0.108241	5.49767	3.84844e-08	7.66974e-07		cICDH	AT1G65930	6347.69	0.0790282	0.0728809	1.08435	0.278211	0.522615
c-NAD-MDH1	AT1G04410	9287.83	0.0417313	0.088191	-0.473193	0.636076	0.779471		c-NAD-MDH1	AT1G04410	11201.4	0.338883	0.0478622	7.08038	1.43755e-12	8.0961e-11
E1-OGDH2	AT5G65750	490.972	-0.814759	0.111086	7.33449	2.22573e-13	1.25006e-11		E1-OGDH2	AT5G65750	758.778	-0.0705259	0.110421	-0.6387	0.523018	0.738191
E2-OGDH2	AT5G55070	1344.39	0.345667	0.0847148	-4.08035	4.4967e-05	0.000389656		E2-OGDH2	AT5G55070	1161.96	0.282749	0.0729079	3.87817	0.000105246	0.00124115
FUM2	AT5G50950	11992.3	0.205293	0.158357	-1.29639	0.19484	0.356611		FUM2	AT5G50950	3335.04	-0.473861	0.103343	-4.58532	4.53292e-06	7.81282e-05
ICDH	AT1G54340	439.876	-0.618045	0.095957	6.44085	1.18806e-10	4.16839e-09		ICDH	AT1G54340	551.544	0.217695	0.0919836	2.36667	0.0179487	0.0816628
MAB1	AT5G50850	2650.68	0.327081	0.079518	-4.1133	3.90041e-05	0.000344228		MAB1	AT5G50850	2649.36	0.183979	0.0593024	3.10238	0.00191969	0.0138946
MDH	AT3G47520	1565.32	0.477054	0.137974	-3.45757	0.000545071	0.00331385		MDH	AT3G47520	1554.52	0.189118	0.0552121	3.42529	0.000614135	0.00552324
mMDH2	AT3G15020	403.226	0.477779	0.13329	-3.58451	0.000337708	0.00221124		mMDH2	AT3G15020	446.309	0.449329	0.0991725	4.53078	5.87649e-06	9.83721e-05
mtLPD1	AT1G48030	9753.46	-0.213974	0.100819	2.12237	0.0338068	0.0972437		mtLPD1	AT1G48030	5854.78	0.233384	0.0738802	3.15895	0.00158336	0.0119761
PCK1	AT4G37870	1853.71	-0.433037	0.0906852	4.77517	1.79556e-06	2.32035e-05		PCK1	AT4G37870	4253.9	0.107452	0.0687838	1.56217	0.118247	0.309474
PDH-E1_ALPHA	AT1G01090	3045.43	0.369088	0.0750679	-4.91672	8.8006e-07	1.2403e-05		PDH-E1_ALPHA	AT1G01090	3338.68	0.155008	0.0609724	2.54226	0.0110139	0.0562795
PDH-E1_BETA	AT1G30120	2743.93	0.450014	0.0734354	-6.12802	8.89784e-10	2.54374e-08		PDH-E1_BETA	AT1G30120	2593.59	0.112737	0.0856647	1.31603	0.188164	0.414391
PMDH2	AT5G09660	38393.1	0.25498	0.110738	-2.30254	0.0213045	0.0677054		PMDH2	AT5G09660	17505.2	0.373848	0.124421	3.00471	0.00265837	0.0181922
SDH1-1	AT5G66760	1712.03	0.741869	0.116118	-6.38891	1.67077e-10	5.66395e-09		SDH1-1	AT5G66760	1987.68	-0.0257664	0.0990112	-0.260237	0.794681	0.906173
SDH3-1	AT5G09600	266.002	0.0314752	0.111936	-0.28119	0.778565	0.875302		SDH3-1	AT5G09600	251.094	0.325986	0.117235	2.78062	0.0054255	0.032091
FUM1	AT2G47510	824.372	-0.121395	0.106847	1.13616	0.255892	0.432732		FUM1	AT2G47510	1845.19	-0.137996	0.0579838	-2.37991	0.017317	0.0795353
ATCS	AT2G44350	1581.97	0.104573	0.0897003	-1.1658	0.243694	0.418852		ATCS	AT2G44350	1582.63	0.166016	0.0754612	2.20002	0.0278054	0.112745
NAD-ME1	AT2G13560	2637.49	0.0501004	0.0586444	-0.854307	0.392935	0.576828		NAD-ME1	AT2G13560	2728.71	-0.115175	0.0527571	-2.18311	0.0290274	0.116479
PMDH1	AT2G22780	883.926	-0.160889	0.0731918	2.19819	0.0279359	0.0836035		PMDH1	AT2G22780	1108.78	0.134437	0.064013	2.10015	0.0357153	0.135488
Dihydrolipoamide succinyltransferase	AT4G26910	557.372	0.0039834	0.114806	-0.0346967	0.972322	0.986428		Dihydrolipoamidesuccinyltransferase	AT4G26910	649.031	-0.150041	0.0771174	-1.94561	0.0517012	0.17546
CSY3	AT2G42790	415.342	0.0833162	0.203514	-0.409388	0.682255	0.812781		CSY3	AT2G42790	516.206	0.168017	0.0879153	1.91112	0.0559886	0.185838
c-NAD-MDH2	AT5G43330	457.932	-0.288123	0.131617	2.18911	0.028589	0.0851519		c-NAD-MDH2	AT5G43330	438.252	0.266477	0.139592	1.90897	0.0562654	0.1864
ACO3	AT2G05710	5254.09	-0.216557	0.128822	1.68105	0.0927532	0.2094		ACO3	AT2G05710	4379.9	0.104158	0.0627434	1.66006	0.0969023	0.271587
dihydrolipoamide dehydrogenase	AT4G16155	1870.55	0.368098	0.133073	-2.76613	0.00567252	0.023252		dihydrolipoamidedehydrogenase	AT4G16155	1763.39	0.117915	0.0728281	1.61909	0.105428	0.286678
IDH1	AT4G35260	832.086	0.316423	0.101657	-3.11264	0.00185425	0.0092708		DH1	AT4G35260	1023.89	-0.110526	0.0697628	-1.58432	0.113122	0.300399
Succinyl-CoA ligase	AT5G23250	427.924	0.0729171	0.146802	-0.496704	0.619398	0.765908		Succinyl-CoAligase	AT5G23250	610.326	0.12734	0.0823687	1.54598	0.12211	0.315949
CSY2	AT3G58750	515.076	-0.433248	0.130538	3.31893	0.000903624	0.00506701		CSY2	AT3G58750	925.358	-0.106113	0.0791428	-1.34077	0.179994	0.403042
SDH1-2	AT2G18450	2.96672	-0.316008	0.351261	0.899641	0.368312	0.55306		SDH1-2	AT2G18450	26.3125	-0.593308	0.463689	-1.27954	0.200707	0.431169
ACLA-2	AT1G60810	174.568	-0.383575	0.147935	2.59286	0.00951809	0.0355979		ACLA-2	AT1G60810	561.973	0.142806	0.111974	1.27535	0.202184	0.432917
NAD-ME2	AT4G00570	1091.85	0.143005	0.084364	-1.6951	0.0900572	0.205055		NAD-ME2	AT4G00570	1395.05	0.0726493	0.0598216	1.21443	0.224582	0.462064
LPD1	AT3G16950	332.88	0.53407	0.173464	-3.07886	0.00207796	0.0101714		LPD1	AT3G16950	840.664	-0.096476	0.0808502	-1.19327	0.232764	0.472237
IDH-VI	AT3G09810	282.813	0.249855	0.153901	-1.62347	0.104488	0.228459		IDH-VI	AT3G09810	402.23	-0.112037	0.12084	-0.927152	0.353848	0.599051
SDH3-2	AT4G32210	278.792	-0.226949	0.106349	2.134	0.0328427	0.0950289		SDH3-2	AT4G32210	272.818	0.0727054	0.105679	0.68798	0.491465	0.714416
mtLPD2	AT3G17240	760.734	0.0778077	0.119827	-0.649332	0.516124	0.685001		mtLPD2	AT3G17240	1262.8	0.0497895	0.0748572	0.665127	0.505969	0.724883
ACO2	AT4G26970	2675.04	0.0859833	0.0920335	-0.934261	0.350169	0.535613		ACO2	AT4G26970	2264.24	0.0454695	0.0724387	0.627697	0.530203	0.743047
2-oxoglutarate dehydrogenase	AT3G55410	1935.01	0.332274	0.101455	-3.2751	0.00105626	0.00577131		2-oxoglutaratedehydrogenase	AT3G55410	2038.5	0.0322668	0.0595478	0.541864	0.587912	0.782594
Succinyl-CoA ligase	AT5G08300	805.669	0.133306	0.0925129	-1.44095	0.1496	0.295765		Succinyl-CoAligase	AT5G08300	1129.85	-0.037929	0.0802838	-0.472437	0.636615	0.814231
IDH-V	AT5G03290	747.161	-0.0423244	0.0877724	0.482206	0.629659	0.774209		IDH-V	AT5G03290	1100.32	0.0314004	0.0818734	0.383524	0.701331	0.853822
SDH2-1	AT3G27380	537.648	0.0164041	0.121911	-0.134558	0.892961	0.942457		SDH2-1	AT3G27380	976.289	0.0346269	0.0937664	0.369289	0.711913	0.859302
E1_ALPHA	AT1G59900	2096.57	-0.0265637	0.0822842	0.322828	0.746825	0.856264		E1_ALPHA	AT1G59900	2002.16	0.0127933	0.0526195	0.243129	0.807906	0.912968
IDH2	AT2G17130	236.684	-0.185693	0.133777	1.38807	0.165114	0.317524		IDH2	AT2G17130	381.962	0.0195937	0.1456	0.134572	0.89295	0.954171
SDH2-2	AT5G40650	187.969	-0.0503589	0.136543	0.368814	0.712266	0.832995		SDH2-2	AT5G40650	260.91	0.0122743	0.123144	0.0996745	0.920603	0.967031
IAR4	AT1G24180	726.282	0.0967861	0.0806697	-1.19978	0.230224	0.402436		IAR4	AT1G24180	1154.05	0.00944046	0.101038	0.0934347	0.925558	0.968796
c-NAD-MDH3	AT5G56720	24.7773	-0.376516	0.293035	1.28488	0.198833	0.362169		c-NAD-MDH3	AT5G56720	44.0648	0.0128425	0.272754	0.0470844	0.962446	0.985671

## Sheet: 8-Glycolysis pathway
LC/NC	GeneID	baseMean	log2FoldChange	lfcSE	stat	pvalue	padj		NH4+/GM	Gene	baseMean	log2FoldChange	lfcSE	stat	pvalue	padj
ENO1	AT1G74030	119.918	-0.542489	0.146375	3.70615	0.000210434	0.00147561		ENO1	AT1G74030	493.046	0.220413	0.128855	1.71055	0.087165	0.252621
FBA5	AT4G26530	25465	0.460054	0.159166	-2.8904	0.00384747	0.0169185		FBA5	AT4G26530	9712.81	0.41525	0.133273	3.11578	0.00183457	0.0134277
GAPC1	AT3G04120	9218.05	0.321548	0.107381	-2.99445	0.00274936	0.0128498		GAPC1	AT3G04120	8761.23	0.292084	0.064467	4.53075	5.8774e-06	9.83721e-05
HKL1	AT1G50460	440.899	-0.767349	0.221994	3.45663	0.00054698	0.00332345		HKL1	AT1G50460	524.113	-0.677988	0.131092	-5.17183	2.31807e-07	5.49533e-06
HXK1	AT4G29130	1076.96	0.389076	0.0955862	-4.07042	4.69284e-05	0.000404556		HXK1	AT4G29130	692.711	0.196477	0.0785635	2.50087	0.0123888	0.0615102
HXK3	AT1G47840	20.3169	-0.984009	0.312586	3.14796	0.00164415	0.00839175		HXK3	AT1G47840	104.489	-0.763969	0.217028	-3.52013	0.00043133	0.00412485
iPGAM2	AT3G08590	3539.24	0.631756	0.0978033	-6.45945	1.05081e-10	3.73915e-09		iPGAM2	AT3G08590	1806.14	0.647082	0.0867679	7.45762	8.80991e-14	5.96042e-12
LOS2	AT2G36530	7286.77	0.559801	0.127057	-4.40592	1.05334e-05	0.000109759		LOS2	AT2G36530	9139.8	0.184383	0.046339	3.97899	6.92073e-05	0.000865112
MEE51	AT4G04040	1806.72	-0.554176	0.115646	4.79203	1.65106e-06	2.16428e-05		MEE51	AT4G04040	1626.25	0.0618714	0.075443	0.820108	0.412155	0.649812
PFK4	AT5G61580	623.512	-0.370247	0.103602	3.57373	0.000351932	0.00228574		PFK4	AT5G61580	545.377	0.104159	0.0798226	1.30488	0.191932	0.419417
PFK6	AT4G32840	98.1113	-0.475702	0.191192	2.48809	0.0128433	0.0450616		PFK6	AT4G32840	222.638	-0.0528757	0.111425	-0.47454	0.635115	0.813032
PGI1	AT4G24620	3925.85	0.532303	0.0954394	-5.5774	2.44146e-08	5.11993e-07		PGI1	AT4G24620	2554.23	0.232359	0.0631342	3.6804	0.000232865	0.00245445
PGK	AT1G79550	4991.27	0.123897	0.131095	-0.945092	0.344612	0.530353		PGK	AT1G79550	4356.37	0.36704	0.0761392	4.82064	1.43095e-06	2.82637e-05
PGM	AT1G78050	68.1951	0.487868	0.198591	-2.45664	0.0140242	0.0483426		PGM	AT1G78050	138.221	-0.326427	0.172035	-1.89745	0.0577688	0.189968
Phosphofructokinasefamilyprotein	AT1G20950	972.607	0.869513	0.104016	-8.35941	6.30301e-17	6.45383e-15		Phosphofructokinasefamilyprotein	AT1G20950	1046.56	-0.0532587	0.0657557	-0.809949	0.417969	0.654516
PGK2	AT1G56190	6895.66	-0.107428	0.0997542	1.07692	0.281515	0.463308		Phosphoglyceratekinasefamilyprotein	AT1G56190	3894.74	0.295859	0.0729065	4.05806	4.94827e-05	0.00064445
PKp3	AT1G32440	1589.61	1.39968	0.115546	-12.1137	8.93893e-34	1.12122e-30		PKp3	AT1G32440	700.492	-0.00405202	0.0677282	-0.0598276	0.952293	0.980913
PKP-BETA1	AT5G52920	2658.68	0.36224	0.124603	-2.90715	0.00364742	0.0161697		PKP-BETA1	AT5G52920	3880.85	0.222473	0.0626709	3.54986	0.000385441	0.00376022
Pyruvatekinasefamilyprotein	AT5G08570	2191.93	0.371344	0.12884	-2.88221	0.003949	0.0172965		Pyruvatekinasefamilyprotein	AT5G08570	1305.16	0.507334	0.0723988	7.0075	2.42619e-12	1.34137e-10
SIS familyprotein	AT5G42740	1693.47	0.291137	0.104	-2.79939	0.00511991	0.0214468		Sugarisomerase(SIS)familyprotein	AT5G42740	1306.18	0.39807	0.0606043	6.56835	5.08754e-11	2.34545e-09
TIM	AT2G21170	10949.2	-0.0230538	0.0800933	0.287837	0.773472	0.872061		TIM	AT2G21170	8613.72	0.16313	0.0524487	3.11028	0.00186913	0.0136185
TPI	AT3G55440	8059.82	0.188746	0.0740709	-2.54817	0.0108288	0.0394275		TPI	AT3G55440	8414.7	0.336559	0.0621104	5.41873	6.00255e-08	1.61187e-06
PFK1	AT4G29220	1807.1	-0.258895	0.119113	2.17353	0.0297406	0.0878646		PFK1	AT4G29220	1275.82	0.124347	0.0666062	1.8669	0.0619162	0.19926
PFK2	AT5G47810	89.4106	0.0249943	0.196527	-0.12718	0.898798	0.945139		PFK2	AT5G47810	115.494	-0.271925	0.153937	-1.76648	0.077316	0.231714
Pyruvatekinasefamilyprotein	AT5G63680	406.392	-0.0425698	0.109896	0.387365	0.698486	0.82416		Pyruvatekinasefamilyprotein	AT5G63680	484.249	-0.132541	0.0911661	-1.45384	0.14599	0.353491
FBA7	AT4G26520	1657.72	0.138107	0.0912435	-1.51361	0.130124	0.266663		FBA7	AT4G26520	893.33	0.143959	0.106428	1.35264	0.17617	0.397427
PFK5	AT2G22480	536.269	-0.0614121	0.0967562	0.63471	0.525618	0.691531		PFK5	AT2G22480	521.001	0.115128	0.100502	1.14553	0.251991	0.49463
PFK3	AT4G26270	69.8539	-0.236236	0.276852	0.853294	0.393496	0.577211		PFK3	AT4G26270	93.9366	-0.18525	0.167406	-1.10659	0.268472	0.512178
ENOC	AT2G29560	409.175	-0.0845247	0.09511	0.888704	0.374162	0.558793		ENOC	AT2G29560	580.501	-0.0991615	0.0974372	-1.0177	0.308822	0.55503
PyruvaB46:H59sefamilyprotein5	AT3G04050	12.7768	0.551513	0.340597	-1.61926	0.105392	0.229904		PyruvaB46:H59sefamilyprotein5	AT3G04050	5.37468	0.550431	0.680334	0.80906	0.41848	0.654916
FBA4	AT5G03690	201.488	-0.0211931	0.130578	0.162303	0.871067	0.929914		FBA4	AT5G03690	208.557	-0.0823137	0.134965	-0.60989	0.541934	0.751358
PFK7	AT5G56630	475.386	0.205071	0.112684	-1.81988	0.0687774	0.167654		PFK7	AT5G56630	410.586	0.0755705	0.125344	0.602903	0.546573	0.754167
PKP-ALPHA	AT3G22960	3495.51	0.00383074	0.0861225	-0.0444802	0.964522	0.98191		PKP-ALPHA	AT3G22960	5128.8	0.0266464	0.0451943	0.589596	0.555461	0.760144
pyruvatekinasefamilyprotein	AT3G49160	144.211	-0.477659	0.329678	1.44886	0.147375	0.292752		pyruvatekinasefamilyprotein	AT3G49160	453.293	-0.0294848	0.137057	-0.215128	0.829668	0.925119
PDE345	AT2G01140	1488.74	0.0413194	0.0869075	-0.475441	0.634472	0.778122		PDE345	AT2G01140	2633.33	-0.0106744	0.0725624	-0.147106	0.883048	0.94981
GAPCP-1	AT1G79530	58.1422	-0.265799	0.227264	1.16956	0.242177	0.417103		GAPCP-1	AT1G79530	549.273	-0.0183111	0.167676	-0.109206	0.913039	0.963923
Phosphoglyceratemutasefamilyprotein	AT3G50520	226.965	-0.0580394	0.123531	0.469838	0.638471	0.780909		Phosphoglyceratemutasefamilyprotein	AT3G50520	263.264	-0.00382104	0.114491	-0.033374	0.973376	0.989746

## Sheet: 9-CBB cycle
LC/NC	GeneID	baseMean	log2FoldChange	lfcSE	stat	pvalue	padj		NH4+/GM	Gene	baseMean	log2FoldChange	lfcSE	stat	pvalue	padj
FBA2	AT4G38970	119198	0.625031	0.0932135	-6.70537	2.00895e-11	7.93655e-10		FBA2	AT4G38970	62661.1	0.231347	0.0964151	2.39949	0.0164179	0.0765192
GAPA-1	AT3G26650	69190.4	0.567994	0.0898508	-6.32152	2.59001e-10	8.26374e-09		GAPA-1	AT3G26650	36520.9	0.261147	0.100785	2.59114	0.00956599	0.0505974
TKL1	AT3G60750	52234.7	0.482015	0.0891812	-5.4049	6.48457e-08	1.22196e-06		TKL1	AT3G60750	33666.1	0.302144	0.0588927	5.13042	2.89093e-07	6.70838e-06
PRK	AT1G32060	50382.6	0.525883	0.105746	-4.97306	6.59053e-07	9.64737e-06		PRK	AT1G32060	23998.8	0.113134	0.0877339	1.28951	0.19722	0.426933
GAPC2	AT1G13440	25942	0.45954	0.0980176	-4.68834	2.75432e-06	3.37669e-05		GAPC2	AT1G13440	18039	0.4936	0.0799896	6.1708	6.79443e-10	2.70712e-08
GAPCP-2	AT1G16300	113.023	0.871417	0.20469	-4.25725	2.06955e-05	0.000199586		GAPCP-2	AT1G16300	161.12	0.340271	0.168405	2.02055	0.0433264	0.155206
EMB3119	AT3G04790	3851.91	0.466811	0.112384	-4.1537	3.27141e-05	0.000294017		EMB3119	AT3G04790	2440.61	0.30122	0.0833262	3.61495	0.000300402	0.00304021
TKL2	AT2G45290	293.532	-0.507793	0.133133	3.81418	0.000136636	0.00101336		TKL2	AT2G45290	436.047	0.0924308	0.18773	0.492361	0.622464	0.805441
pNAD-MDH	AT3G47520	1565.32	0.477054	0.137974	-3.45757	0.000545071	0.00331385		pNAD-MDH	AT3G47520	1554.52	0.189118	0.0552121	3.42529	0.000614135	0.00552324
HCEF1	AT3G54050	24156.9	0.28177	0.085212	-3.30669	0.000944046	0.00525987		HCEF1	AT3G54050	14775.3	0.190292	0.0810971	2.34647	0.0189524	0.0851218
GAPC1	AT3G04120	9218.05	0.321548	0.107381	-2.99445	0.00274936	0.0128498		GAPC1	AT3G04120	8761.23	0.292084	0.064467	4.53075	5.8774e-06	9.83721e-05
FBA5	AT4G26530	25465	0.460054	0.159166	-2.8904	0.00384747	0.0169185		FBA5	AT4G26530	9712.81	0.41525	0.133273	3.11578	0.00183457	0.0134277
TPI	AT3G55440	8059.82	0.188746	0.0740709	-2.54817	0.0108288	0.0394275		TPI	AT3G55440	8414.7	0.336559	0.0621104	5.41873	6.00255e-08	1.61187e-06
SBPASE	AT3G55800	35188.2	0.237995	0.0971256	-2.45039	0.0142702	0.0489972		SBPASE	AT3G55800	18950.2	0.294757	0.0834912	3.5304	0.000414938	0.00400285
RBCS1A	AT1G67090	331084	0.26094	0.113302	-2.30305	0.021276	0.0676363		RBCS1A	AT1G67090	264515	0.280511	0.0812396	3.45288	0.000554628	0.00506901
GAPB	AT1G42970	84173.4	0.231037	0.112523	-2.05324	0.0400493	0.111001		GAPB	AT1G42970	38689.1	0.517229	0.104091	4.96902	6.72935e-07	1.43527e-05
PGK2	AT1G56190	6895.66	-0.107428	0.0997542	1.07692	0.281515	0.463308		PGK2	AT1G56190	3894.74	0.295859	0.0729065	4.05806	4.94827e-05	0.00064445
FBA1	AT2G21330	60848.6	0.0861679	0.088983	-0.968364	0.332863	0.518208		FBA1	AT2G21330	22728.1	0.460369	0.118571	3.88264	0.000103329	0.00122131
PGK1	AT3G12780	35990.3	-0.0527254	0.0900836	0.585294	0.55835	0.718165		PGK1	AT3G12780	24125.2	0.306178	0.0797411	3.83965	0.00012321	0.00141535
TIM	AT2G21170	10949.2	-0.0230538	0.0800933	0.287837	0.773472	0.872061		TIM	AT2G21170	8613.72	0.16313	0.0524487	3.11028	0.00186913	0.0136185
RPE	AT5G61410	19918	0.124642	0.100297	-1.24273	0.213966	0.381188		RPE	AT5G61410	12421.9	0.166317	0.0757608	2.19529	0.0281428	0.113806
NA	AT1G63290	436.208	-0.0693927	0.0856645	0.810052	0.41791	0.599674		NA	AT1G63290	599.298	0.142679	0.0826877	1.72551	0.0844354	0.246934
RBCS2B	AT5G38420	116131	-0.138993	0.104585	1.32899	0.183851	0.342655		RBCS2B	AT5G38420	55322.5	-0.168204	0.107645	-1.56259	0.11815	0.309337
FBA7	AT4G26520	1657.72	0.138107	0.0912435	-1.51361	0.130124	0.266663		FBA7	AT4G26520	893.33	0.143959	0.106428	1.35264	0.17617	0.397427
RBCS3B	AT5G38410	196891	-0.148276	0.118452	1.25178	0.210649	0.376817		RBCS3B	AT5G38410	147937	-0.0979448	0.0984587	-0.994781	0.319843	0.566405
FBA4	AT5G03690	201.488	-0.0211931	0.130578	0.162303	0.871067	0.929914		FBA4	AT5G03690	208.557	-0.0823137	0.134965	-0.60989	0.541934	0.751358
RBCS1B	AT5G38430	38818.8	-0.0893224	0.140002	0.638006	0.52347	0.689745		RBCS1B	AT5G38430	25861.2	-0.0404952	0.117867	-0.343568	0.731171	0.870585
PDE345	AT2G01140	1488.74	0.0413194	0.0869075	-0.475441	0.634472	0.778122		PDE345	AT2G01140	2633.33	-0.0106744	0.0725624	-0.147106	0.883048	0.94981
GAPCP-1	AT1G79530	58.1422	-0.265799	0.227264	1.16956	0.242177	0.417103		GAPCP-1	AT1G79530	549.273	-0.0183111	0.167676	-0.109206	0.913039	0.963923
