# Supplementary material for: Rewiring of primary metabolism for ammonium recycling under short-term low CO2 treatment – its implication for C4 evolution
Source: Front Plant Sci. 2024 Aug 1;15:1322261. doi: 10.3389/fpls.2024.1322261 (PMC11324553; doi:10.3389/fpls.2024.1322261)
Supplement: Supplementary file 3 [file DataSheet_2.xlsx]

## Sheet: GO-LC_up_regulated_genes
Table S3: GO terms enriched in the A. thaliana low CO2 up-regulated genes (p-value<0.05).
GO term	Ontology	Description	Number in input list	Number in BG/Ref	p-value	FDR	Enrich Factor
GO:0019320	P	hexose catabolic process	6	6	0.00039	0.015	1
GO:0009423	P	chorismate biosynthetic process	8	9	6.9e-05	0.0033	0.888889
GO:0016120	P	carotene biosynthetic process	6	7	0.00067	0.024	0.857143
GO:0071484	P	cellular response to light intensity	8	10	0.00011	0.0051	0.8
GO:0046417	P	chorismate metabolic process	10	13	2e-05	0.001	0.769231
GO:0046365	P	monosaccharide catabolic process	6	8	0.0011	0.036	0.75
GO:0016119	P	carotene metabolic process	8	12	0.00028	0.011	0.666667
GO:0043155	P	negative regulation of photosynthesis, light reaction	9	14	0.00014	0.006	0.642857
GO:0016122	P	xanthophyll metabolic process	9	14	0.00014	0.006	0.642857
GO:0010205	P	photoinhibition	9	14	0.00014	0.006	0.642857
GO:0048564	P	photosystem I assembly	7	11	0.00082	0.028	0.636364
GO:0042360	P	vitamin E metabolic process	7	11	0.00082	0.028	0.636364
GO:0010189	P	vitamin E biosynthetic process	7	11	0.00082	0.028	0.636364
GO:0009269	P	response to desiccation	14	24	4.7e-06	0.00029	0.583333
GO:0005978	P	glycogen biosynthetic process	7	12	0.0012	0.039	0.583333
GO:0005986	P	sucrose biosynthetic process	11	19	5.2e-05	0.0025	0.578947
GO:0043650	P	dicarboxylic acid biosynthetic process	9	16	0.00029	0.012	0.5625
GO:0006112	P	energy reserve metabolic process	10	18	0.00015	0.0063	0.555556
GO:0005977	P	glycogen metabolic process	10	18	0.00015	0.0063	0.555556
GO:0006833	P	water transport	11	20	7.3e-05	0.0033	0.55
GO:0006094	P	gluconeogenesis	11	20	7.3e-05	0.0033	0.55
GO:0042044	P	fluid transport	11	20	7.3e-05	0.0033	0.55
GO:1905156	P	negative regulation of photosynthesis	9	17	0.00041	0.016	0.529412
GO:0010380	P	regulation of chlorophyll biosynthetic process	10	19	0.0002	0.0085	0.526316
GO:0006006	P	glucose metabolic process	21	40	8e-08	7.5e-06	0.525
GO:0042548	P	regulation of photosynthesis, light reaction	13	26	3.5e-05	0.0018	0.5
GO:0046364	P	monosaccharide biosynthetic process	13	26	3.5e-05	0.0018	0.5
GO:0019319	P	hexose biosynthetic process	12	24	7e-05	0.0033	0.5
GO:1901463	P	regulation of tetrapyrrole biosynthetic process	10	20	0.00028	0.011	0.5
GO:0006612	P	protein targeting to membrane	14	29	2.4e-05	0.0012	0.482759
GO:0016108	P	tetraterpenoid metabolic process	20	42	5.4e-07	4e-05	0.47619
GO:0016116	P	carotenoid metabolic process	20	42	5.4e-07	4e-05	0.47619
GO:0046351	P	disaccharide biosynthetic process	20	42	5.4e-07	4e-05	0.47619
GO:0005983	P	starch catabolic process	8	17	0.0015	0.048	0.470588
GO:0043467	P	regulation of generation of precursor metabolites and energy	13	28	6.4e-05	0.0031	0.464286
GO:0019252	P	starch biosynthetic process	16	35	1.1e-05	0.00061	0.457143
GO:0010207	P	photosystem II assembly	10	22	0.00051	0.019	0.454545
GO:0072525	P	pyridine-containing compound biosynthetic process	10	22	0.00051	0.019	0.454545
GO:0016117	P	carotenoid biosynthetic process	15	34	2.8e-05	0.0014	0.441176
GO:0016109	P	tetraterpenoid biosynthetic process	15	34	2.8e-05	0.0014	0.441176
GO:0030048	P	actin filament-based movement	9	21	0.0013	0.043	0.428571
GO:0019685	P	photosynthesis, dark reaction	9	21	0.0013	0.043	0.428571
GO:0009644	P	response to high light intensity	32	76	2.7e-09	3.9e-07	0.421053
GO:0005985	P	sucrose metabolic process	16	38	2.4e-05	0.0013	0.421053
GO:0015977	P	carbon fixation	10	24	0.00086	0.029	0.416667
GO:0010025	P	wax biosynthetic process	10	24	0.00086	0.029	0.416667
GO:0042181	P	ketone biosynthetic process	12	29	0.00028	0.011	0.413793
GO:0009631	P	cold acclimation	19	46	5.4e-06	0.00033	0.413043
GO:0009668	P	plastid membrane organization	16	39	3.1e-05	0.0016	0.410256
GO:0005982	P	starch metabolic process	27	66	7.3e-08	6.9e-06	0.409091
GO:1901401	P	regulation of tetrapyrrole metabolic process	11	27	0.00056	0.02	0.407407
GO:0019318	P	hexose metabolic process	29	72	3.2e-08	3.4e-06	0.402778
GO:0090056	P	regulation of chlorophyll metabolic process	10	25	0.0011	0.037	0.4
GO:0010166	P	wax metabolic process	10	25	0.0011	0.037	0.4
GO:0010027	P	thylakoid membrane organization	15	38	7.8e-05	0.0035	0.394737
GO:0005984	P	disaccharide metabolic process	26	66	2.3e-07	1.9e-05	0.393939
GO:1901663	P	quinone biosynthetic process	11	28	0.00071	0.025	0.392857
GO:1901661	P	quinone metabolic process	11	28	0.00071	0.025	0.392857
GO:0010109	P	regulation of photosynthesis	15	39	9.9e-05	0.0045	0.384615
GO:0006757	P	ATP generation from ADP	27	71	2.4e-07	2e-05	0.380282
GO:0006096	P	glycolytic process	27	71	2.4e-07	2e-05	0.380282
GO:0009225	P	nucleotide-sugar metabolic process	20	53	9.2e-06	0.00053	0.377358
GO:0015994	P	chlorophyll metabolic process	32	85	2.3e-08	2.6e-06	0.376471
GO:0009767	P	photosynthetic electron transport chain	21	56	6e-06	0.00036	0.375
GO:0019684	P	photosynthesis, light reaction	50	134	3.9e-12	7.7e-10	0.373134
GO:0009135	P	purine nucleoside diphosphate metabolic process	27	73	3.7e-07	2.9e-05	0.369863
GO:0009179	P	purine ribonucleoside diphosphate metabolic process	27	73	3.7e-07	2.9e-05	0.369863
GO:0046031	P	ADP metabolic process	27	73	3.7e-07	2.9e-05	0.369863
GO:0009185	P	ribonucleoside diphosphate metabolic process	27	73	3.7e-07	2.9e-05	0.369863
GO:0044724	P	single-organism carbohydrate catabolic process	35	95	8.1e-09	1e-06	0.368421
GO:0009687	P	abscisic acid metabolic process	11	30	0.0011	0.037	0.366667
GO:0009765	P	photosynthesis, light harvesting	16	44	0.0001	0.0045	0.363636
GO:0009073	P	aromatic amino acid family biosynthetic process	17	47	6.5e-05	0.0031	0.361702
GO:0046939	P	nucleotide phosphorylation	28	78	3.7e-07	2.9e-05	0.358974
GO:0010256	P	endomembrane system organization	20	56	1.8e-05	0.00095	0.357143
GO:0006165	P	nucleoside diphosphate phosphorylation	27	76	7.1e-07	5e-05	0.355263
GO:0015991	P	ATP hydrolysis coupled proton transport	11	31	0.0014	0.045	0.354839
GO:0090662	P	ATP hydrolysis coupled transmembrane transport	11	31	0.0014	0.045	0.354839
GO:0009642	P	response to light intensity	51	144	1.1e-11	2.1e-09	0.354167
GO:0006778	P	porphyrin-containing compound metabolic process	34	97	3.5e-08	3.6e-06	0.350515
GO:0009072	P	aromatic amino acid family metabolic process	22	63	9.2e-06	0.00053	0.349206
GO:0018298	P	protein-chromophore linkage	16	46	0.00015	0.0065	0.347826
GO:0033013	P	tetrapyrrole metabolic process	34	98	4.3e-08	4.3e-06	0.346939
GO:0009658	P	chloroplast organization	52	150	1.4e-11	2.5e-09	0.346667
GO:0009132	P	nucleoside diphosphate metabolic process	28	81	6.9e-07	4.9e-05	0.345679
GO:0015995	P	chlorophyll biosynthetic process	21	61	1.7e-05	0.00093	0.344262
GO:0072524	P	pyridine-containing compound metabolic process	43	125	9.4e-10	1.4e-07	0.344
GO:0015979	P	photosynthesis	86	253	8.6e-18	3e-15	0.339921
GO:0006779	P	porphyrin-containing compound biosynthetic process	23	68	8.9e-06	0.00052	0.338235
GO:0009657	P	plastid organization	69	207	3.2e-14	7.7e-12	0.333333
GO:0072657	P	protein localization to membrane	16	48	0.00023	0.0094	0.333333
GO:0090150	P	establishment of protein localization to membrane	16	48	0.00023	0.0094	0.333333
GO:0046496	P	nicotinamide nucleotide metabolic process	38	115	2.1e-08	2.4e-06	0.330435
GO:0006090	P	pyruvate metabolic process	30	91	6.4e-07	4.6e-05	0.32967
GO:0009110	P	vitamin biosynthetic process	27	82	2.3e-06	0.00015	0.329268
GO:0045489	P	pectin biosynthetic process	14	43	0.00067	0.024	0.325581
GO:0019362	P	pyridine nucleotide metabolic process	38	117	3.1e-08	3.3e-06	0.324786
GO:0033014	P	tetrapyrrole biosynthetic process	23	71	1.6e-05	0.00086	0.323944
GO:0005996	P	monosaccharide metabolic process	32	99	4e-07	3e-05	0.323232
GO:0006733	P	oxidoreduction coenzyme metabolic process	42	130	6.7e-09	8.6e-07	0.323077
GO:0010114	P	response to red light	21	65	3.8e-05	0.0019	0.323077
GO:0009312	P	oligosaccharide biosynthetic process	21	65	3.8e-05	0.0019	0.323077
GO:0006766	P	vitamin metabolic process	27	84	3.4e-06	0.00022	0.321429
GO:0010119	P	regulation of stomatal movement	21	67	5.4e-05	0.0026	0.313433
GO:0051186	P	cofactor metabolic process	120	389	2.1e-21	1.6e-18	0.308483
GO:0009108	P	coenzyme biosynthetic process	41	134	3.5e-08	3.6e-06	0.30597
GO:0051188	P	cofactor biosynthetic process	70	229	6.5e-13	1.4e-10	0.305677
GO:0080167	P	response to karrikin	39	128	8.3e-08	7.6e-06	0.304688
GO:0046148	P	pigment biosynthetic process	45	148	9.2e-09	1.1e-06	0.304054
GO:0042440	P	pigment metabolic process	55	181	2.2e-10	3.5e-08	0.303867
GO:0006732	P	coenzyme metabolic process	80	264	2.2e-14	5.6e-12	0.30303
GO:0009250	P	glucan biosynthetic process	36	120	3.5e-07	2.8e-05	0.3
GO:0009414	P	response to water deprivation	103	347	1.3e-17	4.5e-15	0.29683
GO:0009415	P	response to water	105	355	8e-18	2.9e-15	0.295775
GO:0006091	P	generation of precursor metabolites and energy	107	364	5.6e-18	2.1e-15	0.293956
GO:0009409	P	response to cold	112	384	1.5e-18	6e-16	0.291667
GO:0043038	P	amino acid activation	16	55	0.00079	0.027	0.290909
GO:0043039	P	tRNA aminoacylation	16	55	0.00079	0.027	0.290909
GO:0006418	P	tRNA aminoacylation for protein translation	16	55	0.00079	0.027	0.290909
GO:0042364	P	water-soluble vitamin biosynthetic process	20	69	0.00019	0.0081	0.289855
GO:0034637	P	cellular carbohydrate biosynthetic process	63	219	7.5e-11	1.2e-08	0.287671
GO:0046686	P	response to cadmium ion	98	343	6.4e-16	1.9e-13	0.285714
GO:0010118	P	stomatal movement	31	109	5.5e-06	0.00034	0.284404
GO:0046034	P	ATP metabolic process	42	148	1.4e-07	1.2e-05	0.283784
GO:0006767	P	water-soluble vitamin metabolic process	20	71	0.00027	0.011	0.28169
GO:0016051	P	carbohydrate biosynthetic process	95	342	7.6e-15	2e-12	0.277778
GO:0010224	P	response to UV-B	20	72	0.00031	0.012	0.277778
GO:0071482	P	cellular response to light stimulus	36	130	1.7e-06	0.00011	0.276923
GO:0044275	P	cellular carbohydrate catabolic process	18	65	0.00063	0.023	0.276923
GO:0010029	P	regulation of seed germination	21	76	0.00024	0.0097	0.276316
GO:0009167	P	purine ribonucleoside monophosphate metabolic process	48	174	3.8e-08	3.8e-06	0.275862
GO:0009126	P	purine nucleoside monophosphate metabolic process	48	174	3.8e-08	3.8e-06	0.275862
GO:0009161	P	ribonucleoside monophosphate metabolic process	52	191	1.5e-08	1.8e-06	0.272251
GO:0006897	P	endocytosis	19	70	0.00055	0.02	0.271429
GO:0009205	P	purine ribonucleoside triphosphate metabolic process	42	155	4e-07	3e-05	0.270968
GO:0009123	P	nucleoside monophosphate metabolic process	53	196	1.4e-08	1.6e-06	0.270408
GO:0022900	P	electron transport chain	30	112	2e-05	0.0011	0.267857
GO:0043648	P	dicarboxylic acid metabolic process	19	71	0.00064	0.023	0.267606
GO:0009144	P	purine nucleoside triphosphate metabolic process	42	157	5.3e-07	3.9e-05	0.267516
GO:0071478	P	cellular response to radiation	36	135	3.5e-06	0.00022	0.266667
GO:0006972	P	hyperosmotic response	20	75	0.00048	0.018	0.266667
GO:1900140	P	regulation of seedling development	21	79	0.00037	0.014	0.265823
GO:0042278	P	purine nucleoside metabolic process	53	200	2.4e-08	2.7e-06	0.265
GO:0009266	P	response to temperature stimulus	147	559	2.2e-20	1.5e-17	0.26297
GO:0007623	P	circadian rhythm	35	134	7e-06	0.00041	0.261194
GO:0009199	P	ribonucleoside triphosphate metabolic process	43	165	7e-07	5e-05	0.260606
GO:0010035	P	response to inorganic substance	241	926	2.5e-32	4.6e-29	0.260259
GO:0009637	P	response to blue light	21	81	0.00049	0.018	0.259259
GO:0046128	P	purine ribonucleoside metabolic process	51	197	8.1e-08	7.5e-06	0.258883
GO:0071489	P	cellular response to red or far red light	22	85	0.00037	0.014	0.258824
GO:0000271	P	polysaccharide biosynthetic process	52	202	7.1e-08	6.8e-06	0.257426
GO:0015992	P	proton transport	19	74	0.00097	0.032	0.256757
GO:0006818	P	hydrogen transport	19	74	0.00097	0.032	0.256757
GO:0009640	P	photomorphogenesis	22	86	0.00042	0.016	0.255814
GO:0009141	P	nucleoside triphosphate metabolic process	43	170	1.4e-06	9.3e-05	0.252941
GO:0009150	P	purine ribonucleotide metabolic process	51	202	1.6e-07	1.4e-05	0.252475
GO:0006073	P	cellular glucan metabolic process	55	218	5.4e-08	5.2e-06	0.252294
GO:0044042	P	glucan metabolic process	55	218	5.4e-08	5.2e-06	0.252294
GO:0006163	P	purine nucleotide metabolic process	51	204	2e-07	1.7e-05	0.25
GO:0009311	P	oligosaccharide metabolic process	27	108	0.00014	0.006	0.25
GO:0072521	P	purine-containing compound metabolic process	58	233	3.5e-08	3.6e-06	0.248927
GO:0009259	P	ribonucleotide metabolic process	55	221	7.9e-08	7.4e-06	0.248869
GO:0044802	P	single-organism membrane organization	38	153	7.8e-06	0.00046	0.248366
GO:0009639	P	response to red or far red light	55	222	8.9e-08	8.1e-06	0.247748
GO:0006633	P	fatty acid biosynthetic process	39	158	6.7e-06	0.0004	0.246835
GO:0048511	P	rhythmic process	36	146	1.5e-05	0.00084	0.246575
GO:0019693	P	ribose phosphate metabolic process	60	245	3.4e-08	3.5e-06	0.244898
GO:0044723	P	single-organism carbohydrate metabolic process	150	613	2.3e-18	8.8e-16	0.244698
GO:0006970	P	response to osmotic stress	155	636	8.4e-19	3.6e-16	0.243711
GO:0044283	P	small molecule biosynthetic process	159	653	3.2e-19	1.5e-16	0.243492
GO:0010038	P	response to metal ion	117	481	1.9e-14	4.8e-12	0.243243
GO:0015711	P	organic anion transport	25	103	0.00035	0.014	0.242718
GO:0006913	P	nucleocytoplasmic transport	25	103	0.00035	0.014	0.242718
GO:0046942	P	carboxylic acid transport	25	103	0.00035	0.014	0.242718
GO:0051169	P	nuclear transport	25	103	0.00035	0.014	0.242718
GO:0071214	P	cellular response to abiotic stimulus	49	202	7.4e-07	5.1e-05	0.242574
GO:0009651	P	response to salt stress	139	574	8.6e-17	2.8e-14	0.24216
GO:0010017	P	red or far-red light signaling pathway	20	83	0.0014	0.045	0.240964
GO:0006721	P	terpenoid metabolic process	33	137	5e-05	0.0025	0.240876
GO:0009743	P	response to carbohydrate	32	133	6.6e-05	0.0031	0.240602
GO:0033692	P	cellular polysaccharide biosynthetic process	41	171	7.3e-06	0.00043	0.239766
GO:0009117	P	nucleotide metabolic process	72	302	4e-09	5.5e-07	0.238411
GO:0009119	P	ribonucleoside metabolic process	54	227	3.5e-07	2.8e-05	0.237885
GO:0009737	P	response to abscisic acid	137	578	6.2e-16	1.9e-13	0.237024
GO:0006753	P	nucleoside phosphate metabolic process	72	305	5.6e-09	7.4e-07	0.236066
GO:0044262	P	cellular carbohydrate metabolic process	96	407	1.8e-11	3.1e-09	0.235872
GO:0097305	P	response to alcohol	137	583	1.1e-15	3.1e-13	0.234991
GO:0009116	P	nucleoside metabolic process	60	258	1.6e-07	1.4e-05	0.232558
GO:0006720	P	isoprenoid metabolic process	40	172	1.7e-05	0.00092	0.232558
GO:0072330	P	monocarboxylic acid biosynthetic process	58	251	3e-07	2.5e-05	0.231076
GO:0030029	P	actin filament-based process	24	104	0.00084	0.028	0.230769
GO:0009735	P	response to cytokinin	56	244	5.7e-07	4.2e-05	0.229508
GO:0043623	P	cellular protein complex assembly	45	197	7.8e-06	0.00046	0.228426
GO:0044264	P	cellular polysaccharide metabolic process	62	273	2e-07	1.7e-05	0.227106
GO:0061024	P	membrane organization	48	212	4.9e-06	0.0003	0.226415
GO:0009411	P	response to UV	26	115	0.00068	0.024	0.226087
GO:0009636	P	response to toxic substance	23	102	0.0014	0.044	0.22549
GO:0032787	P	monocarboxylic acid metabolic process	108	481	1.3e-11	2.4e-09	0.224532
GO:0019752	P	carboxylic acid metabolic process	193	864	1.5e-19	8.3e-17	0.22338
GO:0019637	P	organophosphate metabolic process	117	524	2.5e-12	5.1e-10	0.223282
GO:0016052	P	carbohydrate catabolic process	57	257	1.2e-06	8e-05	0.22179
GO:0055086	P	nucleobase-containing small molecule metabolic process	82	370	6.1e-09	8e-07	0.221622
GO:0016311	P	dephosphorylation	35	158	0.00013	0.0056	0.221519
GO:1902580	P	single-organism cellular localization	38	172	7e-05	0.0033	0.22093
GO:0009416	P	response to light stimulus	164	744	2.5e-16	7.8e-14	0.22043
GO:0006820	P	anion transport	50	227	6e-06	0.00036	0.220264
GO:0006470	P	protein dephosphorylation	25	114	0.0012	0.04	0.219298
GO:0006413	P	translational initiation	25	114	0.0012	0.04	0.219298
GO:1901605	P	alpha-amino acid metabolic process	53	242	3.7e-06	0.00023	0.219008
GO:1902582	P	single-organism intracellular transport	36	165	0.00013	0.0058	0.218182
GO:1901657	P	glycosyl compound metabolic process	71	326	1.1e-07	9.9e-06	0.217791
GO:0009628	P	response to abiotic stimulus	440	2022	3.4e-42	1.8e-38	0.217606
GO:0009314	P	response to radiation	166	772	1.1e-15	3.1e-13	0.215026
GO:0090351	P	seedling development	38	177	0.00012	0.0052	0.214689
GO:0008299	P	isoprenoid biosynthetic process	33	154	0.00033	0.013	0.214286
GO:1901617	P	organic hydroxy compound biosynthetic process	32	150	0.00043	0.016	0.213333
GO:0006461	P	protein complex assembly	61	287	1.7e-06	0.00011	0.212544
GO:0006520	P	cellular amino acid metabolic process	68	320	4.4e-07	3.3e-05	0.2125
GO:0046394	P	carboxylic acid biosynthetic process	93	438	3.8e-09	5.4e-07	0.212329
GO:0043436	P	oxoacid metabolic process	206	973	1.4e-18	6e-16	0.211716
GO:0009408	P	response to heat	42	199	7.4e-05	0.0034	0.211055
GO:0070271	P	protein complex biogenesis	62	294	1.7e-06	0.00011	0.210884
GO:0044711	P	single-organism biosynthetic process	361	1735	5.1e-31	6.9e-28	0.208069
GO:1901135	P	carbohydrate derivative metabolic process	134	645	5.4e-12	1e-09	0.207752
GO:0006082	P	organic acid metabolic process	228	1099	1.5e-19	8.3e-17	0.207461
GO:0006399	P	tRNA metabolic process	28	135	0.0014	0.044	0.207407
GO:0033993	P	response to lipid	160	772	5.4e-14	1.2e-11	0.207254
GO:0044281	P	small molecule metabolic process	328	1597	2.7e-27	3.3e-24	0.205385
GO:0009845	P	seed germination	33	161	0.00064	0.023	0.204969
GO:0000302	P	response to reactive oxygen species	34	166	0.00054	0.02	0.204819
GO:0071822	P	protein complex subunit organization	69	338	1.3e-06	8.7e-05	0.204142
GO:0044282	P	small molecule catabolic process	33	162	0.0007	0.025	0.203704
GO:0015672	P	monovalent inorganic cation transport	37	182	0.00036	0.014	0.203297
GO:0001101	P	response to acid chemical	239	1181	2.7e-19	1.4e-16	0.202371
GO:0016053	P	organic acid biosynthetic process	107	531	3.2e-09	4.6e-07	0.201507
GO:0005976	P	polysaccharide metabolic process	87	432	9.4e-08	8.4e-06	0.201389
GO:0008610	P	lipid biosynthetic process	105	522	4.8e-09	6.5e-07	0.201149
GO:0042742	P	defense response to bacterium	71	354	1.6e-06	0.0001	0.200565
GO:0034220	P	ion transmembrane transport	51	255	4.6e-05	0.0023	0.2
GO:0055082	P	cellular chemical homeostasis	32	163	0.0014	0.045	0.196319
GO:1901700	P	response to oxygen-containing compound	304	1557	2.6e-22	2.3e-19	0.195247
GO:0071215	P	cellular response to abscisic acid stimulus	52	267	7.1e-05	0.0033	0.194757
GO:0097306	P	cellular response to alcohol	52	267	7.1e-05	0.0033	0.194757
GO:0006631	P	fatty acid metabolic process	49	252	0.00012	0.0051	0.194444
GO:0006979	P	response to oxidative stress	88	453	3.1e-07	2.5e-05	0.19426
GO:0044255	P	cellular lipid metabolic process	125	649	1.7e-09	2.5e-07	0.192604
GO:0006605	P	protein targeting	40	209	0.00061	0.022	0.191388
GO:0051641	P	cellular localization	114	601	1.8e-08	2.1e-06	0.189684
GO:0009738	P	abscisic acid-activated signaling pathway	46	243	0.00031	0.012	0.1893
GO:0009611	P	response to wounding	41	217	0.00066	0.023	0.18894
GO:0065003	P	macromolecular complex assembly	80	424	2.8e-06	0.00018	0.188679
GO:0051649	P	establishment of localization in cell	92	488	5.3e-07	3.9e-05	0.188525
GO:0090407	P	organophosphate biosynthetic process	55	293	0.0001	0.0046	0.187713
GO:0016192	P	vesicle-mediated transport	74	397	9.2e-06	0.00053	0.186398
GO:0005975	P	carbohydrate metabolic process	213	1144	5.2e-14	1.2e-11	0.186189
GO:0046907	P	intracellular transport	88	473	1.5e-06	0.0001	0.186047
GO:0006811	P	ion transport	119	645	3.4e-08	3.5e-06	0.184496
GO:0009617	P	response to bacterium	81	441	5.8e-06	0.00035	0.183673
GO:0042221	P	response to chemical	524	2853	4.3e-33	9.2e-30	0.183666
GO:0034622	P	cellular macromolecular complex assembly	67	365	3.6e-05	0.0018	0.183562
GO:0055085	P	transmembrane transport	122	667	3.4e-08	3.6e-06	0.182909
GO:0070727	P	cellular macromolecule localization	80	441	9.7e-06	0.00055	0.181406
GO:0033365	P	protein localization to organelle	40	221	0.0015	0.048	0.180995
GO:0044712	P	single-organism catabolic process	105	585	6.6e-07	4.7e-05	0.179487
GO:0022607	P	cellular component assembly	105	586	7.1e-07	5e-05	0.179181
GO:0044710	P	single-organism metabolic process	704	3970	2.3e-41	8.4e-38	0.17733
GO:0019725	P	cellular homeostasis	55	314	0.00047	0.018	0.175159
GO:0006886	P	intracellular protein transport	61	350	0.00027	0.011	0.174286
GO:0009725	P	response to hormone	283	1631	6.4e-15	1.7e-12	0.173513
GO:0006629	P	lipid metabolic process	171	994	3.3e-09	4.7e-07	0.172032
GO:0051179	P	localization	433	2517	4.2e-22	3.5e-19	0.17203
GO:0051234	P	establishment of localization	413	2406	6.6e-21	4.7e-18	0.171654
GO:0034613	P	cellular protein localization	70	410	0.00017	0.0072	0.170732
GO:0006810	P	transport	408	2391	3e-20	1.9e-17	0.17064
GO:0055114	P	oxidation-reduction process	267	1566	2.3e-13	5.1e-11	0.170498
GO:0009719	P	response to endogenous stimulus	293	1732	3.2e-14	7.7e-12	0.169169
GO:0071702	P	organic substance transport	208	1234	2.9e-10	4.6e-08	0.168558
GO:0010033	P	response to organic substance	340	2023	4.7e-16	1.4e-13	0.168067
GO:0044765	P	single-organism transport	168	1004	2.4e-08	2.7e-06	0.167331
GO:1901137	P	carbohydrate derivative biosynthetic process	55	329	0.0012	0.04	0.167173
GO:1902578	P	single-organism localization	172	1040	3.4e-08	3.5e-06	0.165385
GO:0071229	P	cellular response to acid chemical	80	485	0.00016	0.0069	0.164948
GO:0045184	P	establishment of protein localization	109	661	1.2e-05	0.00067	0.164902
GO:0006793	P	phosphorus metabolic process	288	1751	9.9e-13	2.1e-10	0.164477
GO:0015031	P	protein transport	107	653	1.8e-05	0.00097	0.163859
GO:0071396	P	cellular response to lipid	67	409	0.00062	0.022	0.163814
GO:0033036	P	macromolecule localization	163	996	1.4e-07	1.2e-05	0.163655
GO:1901575	P	organic substance catabolic process	204	1249	4.1e-09	5.7e-07	0.163331
GO:0008104	P	protein localization	116	715	1.2e-05	0.00068	0.162238
GO:0009793	P	embryo development ending in seed dormancy	77	478	0.0004	0.015	0.161088
GO:1901701	P	cellular response to oxygen-containing compound	102	635	5.6e-05	0.0027	0.16063
GO:0009790	P	embryo development	91	571	0.00018	0.0073	0.15937
GO:0006796	P	phosphate-containing compound metabolic process	276	1735	7.1e-11	1.2e-08	0.159078
GO:0048316	P	seed development	105	661	6.5e-05	0.0031	0.15885
GO:0006996	P	organelle organization	212	1335	1.5e-08	1.8e-06	0.158801
GO:0010154	P	fruit development	110	702	7.2e-05	0.0033	0.156695
GO:0009056	P	catabolic process	224	1430	1.5e-08	1.8e-06	0.156643
GO:0009791	P	post-embryonic development	245	1576	5.6e-09	7.4e-07	0.155457
GO:0006950	P	response to stress	544	3506	3.4e-19	1.6e-16	0.155163
GO:0016043	P	cellular component organization	381	2456	2.3e-13	5.1e-11	0.15513
GO:0050896	P	response to stimulus	949	6250	3.4e-33	9.2e-30	0.15184
GO:0043933	P	macromolecular complex subunit organization	113	745	0.00018	0.0075	0.151678
GO:0044265	P	cellular macromolecule catabolic process	82	541	0.0013	0.042	0.151571
GO:0044248	P	cellular catabolic process	154	1024	2e-05	0.001	0.150391
GO:0044085	P	cellular component biogenesis	164	1095	1.3e-05	0.00072	0.149772
GO:0044763	P	single-organism cellular process	984	6591	3.6e-32	5.6e-29	0.149294
GO:0048608	P	reproductive structure development	188	1265	4.7e-06	0.00029	0.148617
GO:0061458	P	reproductive system development	188	1265	4.7e-06	0.00029	0.148617
GO:0044707	P	single-multicellular organism process	422	2875	1.2e-11	2.3e-09	0.146783
GO:0016310	P	phosphorylation	184	1254	1.1e-05	0.00064	0.14673
GO:0071554	P	cell wall organization or biogenesis	103	704	0.001	0.033	0.146307
GO:0007275	P	multicellular organism development	411	2811	3.8e-11	6.5e-09	0.146211
GO:0009057	P	macromolecule catabolic process	109	747	0.00079	0.027	0.145917
GO:0044699	P	single-organism process	1369	9448	4.2e-44	4.5e-40	0.144898
GO:0032502	P	developmental process	468	3233	4.6e-12	9e-10	0.144757
GO:0032870	P	cellular response to hormone stimulus	127	879	0.00044	0.016	0.144482
GO:0048856	P	anatomical structure development	454	3146	1.6e-11	2.7e-09	0.14431
GO:0032501	P	multicellular organismal process	437	3032	4.8e-11	7.9e-09	0.144129
GO:0071840	P	cellular component organization or biogenesis	405	2812	3.1e-10	4.7e-08	0.144026
GO:0070887	P	cellular response to chemical stimulus	169	1176	6.8e-05	0.0032	0.143707
GO:0044767	P	single-organism developmental process	449	3131	4.6e-11	7.7e-09	0.143405
GO:0003006	P	developmental process involved in reproduction	214	1496	9.8e-06	0.00056	0.143048
GO:0071310	P	cellular response to organic substance	146	1023	0.00027	0.011	0.142717
GO:0071495	P	cellular response to endogenous stimulus	127	890	0.00067	0.024	0.142697
GO:0033554	P	cellular response to stress	122	858	0.00094	0.032	0.142191
GO:0048731	P	system development	271	1929	2.2e-06	0.00014	0.140487
GO:0000003	P	reproduction	239	1721	1.8e-05	0.00097	0.138873
GO:0022414	P	reproductive process	238	1715	2e-05	0.001	0.138776
GO:0044702	P	single organism reproductive process	206	1544	0.00048	0.018	0.13342
GO:1901360	P	organic cyclic compound metabolic process	621	4700	1.4e-09	2.1e-07	0.132128
GO:0006725	P	cellular aromatic compound metabolic process	602	4588	7e-09	9e-07	0.131212
GO:0051716	P	cellular response to stimulus	372	2856	1.7e-05	0.00091	0.130252
GO:0044237	P	cellular metabolic process	1280	9879	8.1e-20	4.9e-17	0.129568
GO:0046483	P	heterocycle metabolic process	573	4433	1.2e-07	1.1e-05	0.129258
GO:0008152	P	metabolic process	1543	12035	1.7e-24	1.7e-21	0.128209
GO:0071704	P	organic substance metabolic process	1359	10672	7.2e-19	3.2e-16	0.127343
GO:0009987	P	cellular process	1621	12771	1.5e-24	1.6e-21	0.126928
GO:1901576	P	organic substance biosynthetic process	749	5913	1.4e-08	1.6e-06	0.12667
GO:0009058	P	biosynthetic process	789	6255	8.8e-09	1.1e-06	0.126139
GO:0006464	P	cellular protein modification process	268	2126	0.0015	0.048	0.126058
GO:0036211	P	protein modification process	268	2126	0.0015	0.048	0.126058
GO:1901362	P	organic cyclic compound biosynthetic process	392	3174	0.0005	0.019	0.123503
GO:0044238	P	primary metabolic process	1220	9890	3.7e-12	7.5e-10	0.123357
GO:0044249	P	cellular biosynthetic process	721	5870	2.1e-06	0.00014	0.122828
GO:0006139	P	nucleobase-containing compound metabolic process	510	4178	0.00017	0.0072	0.122068
GO:0050789	P	regulation of biological process	631	5306	0.00031	0.012	0.118922
GO:0050308	F	sugar-phosphatase activity	8	12	0.00028	0.011	0.666667
GO:0019203	F	carbohydrate phosphatase activity	16	29	1.7e-06	0.00013	0.551724
GO:0004176	F	ATP-dependent peptidase activity	13	24	1.9e-05	0.0011	0.541667
GO:0004222	F	metalloendopeptidase activity	23	50	1.3e-07	1.1e-05	0.46
GO:0016168	F	chlorophyll binding	17	40	1.2e-05	0.00077	0.425
GO:0004298	F	threonine-type endopeptidase activity	10	25	0.0011	0.038	0.4
GO:0070003	F	threonine-type peptidase activity	10	25	0.0011	0.038	0.4
GO:0008514	F	organic anion transmembrane transporter activity	20	57	2.2e-05	0.0011	0.350877
GO:0008237	F	metallopeptidase activity	29	85	5.5e-07	4.4e-05	0.341176
GO:0008378	F	galactosyltransferase activity	13	39	0.00086	0.03	0.333333
GO:0016620	F	oxidoreductase activity, acting on the aldehyde or oxo group of donors, NAD or NADP as acceptor	16	49	0.00028	0.011	0.326531
GO:0016903	F	oxidoreductase activity, acting on the aldehyde or oxo group of donors	23	74	2.7e-05	0.0014	0.310811
GO:0051537	F	2 iron, 2 sulfur cluster binding	18	58	0.0002	0.0084	0.310345
GO:0050661	F	NADP binding	17	57	0.00043	0.017	0.298246
GO:0016627	F	oxidoreductase activity, acting on the CH-CH group of donors	21	81	0.00049	0.018	0.259259
GO:0051540	F	metal cluster binding	32	131	5.1e-05	0.0025	0.244275
GO:0051536	F	iron-sulfur cluster binding	32	131	5.1e-05	0.0025	0.244275
GO:0003779	F	actin binding	29	120	0.00013	0.0058	0.241667
GO:0035251	F	UDP-glucosyltransferase activity	33	137	5e-05	0.0025	0.240876
GO:0004175	F	endopeptidase activity	54	225	2.8e-07	2.3e-05	0.24
GO:0008509	F	anion transmembrane transporter activity	39	164	1.4e-05	0.00084	0.237805
GO:0016616	F	oxidoreductase activity, acting on the CH-OH group of donors, NAD or NADP as acceptor	34	143	4.8e-05	0.0024	0.237762
GO:0016791	F	phosphatase activity	77	327	1.9e-09	2e-07	0.235474
GO:0005342	F	organic acid transmembrane transporter activity	24	102	0.00066	0.023	0.235294
GO:0046943	F	carboxylic acid transmembrane transporter activity	24	102	0.00066	0.023	0.235294
GO:0042578	F	phosphoric ester hydrolase activity	86	391	3.6e-09	3.7e-07	0.219949
GO:0016830	F	carbon-carbon lyase activity	25	115	0.0014	0.046	0.217391
GO:0046527	F	glucosyltransferase activity	34	158	0.00025	0.01	0.21519
GO:0004721	F	phosphoprotein phosphatase activity	43	203	5.7e-05	0.0026	0.211823
GO:0016887	F	ATPase activity	111	530	2.4e-10	2.9e-08	0.209434
GO:0005525	F	GTP binding	59	282	3.8e-06	0.00027	0.20922
GO:0016874	F	ligase activity	53	258	1.8e-05	0.001	0.205426
GO:0008194	F	UDP-glycosyltransferase activity	55	273	2e-05	0.0011	0.201465
GO:0017111	F	nucleoside-triphosphatase activity	154	766	1.3e-12	1.7e-10	0.201044
GO:0016462	F	pyrophosphatase activity	162	809	4.4e-13	6.6e-11	0.200247
GO:0050662	F	coenzyme binding	56	281	2.2e-05	0.0011	0.199288
GO:0016818	F	hydrolase activity, acting on acid anhydrides, in phosphorus-containing anhydrides	162	817	8.7e-13	1.2e-10	0.198286
GO:0016817	F	hydrolase activity, acting on acid anhydrides	163	826	1e-12	1.4e-10	0.197337
GO:0016853	F	isomerase activity	52	264	5.5e-05	0.0026	0.19697
GO:0016614	F	oxidoreductase activity, acting on CH-OH group of donors	42	214	0.00029	0.012	0.196262
GO:0019001	F	guanyl nucleotide binding	59	301	2e-05	0.0011	0.196013
GO:0032561	F	guanyl ribonucleotide binding	59	301	2e-05	0.0011	0.196013
GO:0003729	F	mRNA binding	66	337	7e-06	0.00047	0.195846
GO:0044822	F	poly(A) RNA binding	66	337	7e-06	0.00047	0.195846
GO:0016758	F	transferase activity, transferring hexosyl groups	73	382	5e-06	0.00035	0.191099
GO:0048037	F	cofactor binding	85	451	1.4e-06	0.00011	0.18847
GO:0042623	F	ATPase activity, coupled	73	389	8.6e-06	0.00056	0.187661
GO:0008092	F	cytoskeletal protein binding	49	270	0.00047	0.018	0.181481
GO:0019899	F	enzyme binding	48	265	0.00055	0.02	0.181132
GO:0070011	F	peptidase activity, acting on L-amino acid peptides	82	458	1.2e-05	0.00072	0.179039
GO:0015291	F	secondary active transmembrane transporter activity	59	338	0.00032	0.013	0.174556
GO:0016757	F	transferase activity, transferring glycosyl groups	114	654	7.9e-07	6.1e-05	0.174312
GO:0005215	F	transporter activity	240	1406	3.8e-12	4.7e-10	0.170697
GO:0035639	F	purine ribonucleoside triphosphate binding	425	2515	2e-20	2.8e-17	0.168986
GO:0004871	F	signal transducer activity	68	406	0.00034	0.013	0.167488
GO:0015075	F	ion transmembrane transporter activity	105	629	1.1e-05	0.00071	0.166932
GO:0022804	F	active transmembrane transporter activity	99	595	2.2e-05	0.0011	0.166387
GO:0005524	F	ATP binding	372	2248	1.2e-16	2.3e-14	0.16548
GO:0016829	F	lyase activity	67	406	0.00052	0.019	0.165025
GO:0022891	F	substrate-specific transmembrane transporter activity	150	916	4.3e-07	3.5e-05	0.163755
GO:0022892	F	substrate-specific transporter activity	171	1045	6.9e-08	6.6e-06	0.163636
GO:0032549	F	ribonucleoside binding	427	2617	3.7e-18	1.2e-15	0.163164
GO:0001882	F	nucleoside binding	427	2618	3.9e-18	1.2e-15	0.163102
GO:0001883	F	purine nucleoside binding	426	2612	4.4e-18	1.2e-15	0.163093
GO:0032550	F	purine ribonucleoside binding	426	2612	4.4e-18	1.2e-15	0.163093
GO:0032555	F	purine ribonucleotide binding	426	2631	1.3e-17	2.9e-15	0.161916
GO:0017076	F	purine nucleotide binding	426	2633	1.5e-17	2.9e-15	0.161793
GO:0032553	F	ribonucleotide binding	431	2664	9.1e-18	2.3e-15	0.161787
GO:0097367	F	carbohydrate derivative binding	434	2696	1.5e-17	2.9e-15	0.160979
GO:0022857	F	transmembrane transporter activity	184	1146	7.1e-08	6.6e-06	0.160558
GO:0016491	F	oxidoreductase activity	247	1547	5.7e-10	6.6e-08	0.159664
GO:0008233	F	peptidase activity	86	544	0.00033	0.013	0.158088
GO:0032559	F	adenyl ribonucleotide binding	373	2364	5.3e-14	8.8e-12	0.157783
GO:0030554	F	adenyl nucleotide binding	373	2366	5.9e-14	9.3e-12	0.15765
GO:0000166	F	nucleotide binding	527	3370	3.6e-19	1.5e-16	0.15638
GO:1901265	F	nucleoside phosphate binding	527	3370	3.6e-19	1.5e-16	0.15638
GO:0036094	F	small molecule binding	536	3434	2.3e-19	1.5e-16	0.156086
GO:0005515	F	protein binding	570	3669	2.8e-20	2.8e-17	0.155356
GO:0016787	F	hydrolase activity	496	3279	1.2e-15	2.1e-13	0.151266
GO:0003824	F	catalytic activity	1344	9101	4e-47	1.2e-43	0.147676
GO:0016773	F	phosphotransferase activity, alcohol group as acceptor	156	1072	7.6e-05	0.0033	0.145522
GO:0016788	F	hydrolase activity, acting on ester bonds	161	1131	0.00015	0.0065	0.142352
GO:0016740	F	transferase activity	518	3791	7.7e-10	8.6e-08	0.136639
GO:0043167	F	ion binding	515	3821	5e-09	5e-07	0.134781
GO:0043169	F	cation binding	488	3678	8.4e-08	7.7e-06	0.132681
GO:0046872	F	metal ion binding	486	3673	1.2e-07	1.1e-05	0.132317
GO:0016772	F	transferase activity, transferring phosphorus-containing groups	219	1657	0.0005	0.019	0.132167
GO:0005488	F	binding	1512	12081	3.1e-19	1.5e-16	0.125155
GO:1901363	F	heterocyclic compound binding	904	7718	5.7e-05	0.0026	0.117129
GO:0097159	F	organic cyclic compound binding	905	7737	6.7e-05	0.003	0.11697
GO:0009501	C	amyloplast	7	13	0.0017	0.029	0.538462
GO:0019773	C	proteasome core complex, alpha-subunit complex	7	13	0.0017	0.029	0.538462
GO:0005839	C	proteasome core complex	11	25	0.00033	0.0065	0.44
GO:0010287	C	plastoglobule	35	80	2.2e-10	6.1e-09	0.4375
GO:0009528	C	plastid inner membrane	35	82	3.7e-10	1e-08	0.426829
GO:0009706	C	chloroplast inner membrane	33	79	1.8e-09	4.7e-08	0.417722
GO:0010319	C	stromule	15	37	6.2e-05	0.0013	0.405405
GO:0009504	C	cell plate	13	33	0.00024	0.0047	0.393939
GO:0005838	C	proteasome regulatory particle	12	31	0.00046	0.0087	0.387097
GO:0022624	C	proteasome accessory complex	12	31	0.00046	0.0087	0.387097
GO:0000502	C	proteasome complex	26	69	4.6e-07	1.1e-05	0.376812
GO:0009523	C	photosystem II	25	71	2e-06	4.8e-05	0.352113
GO:0031969	C	chloroplast membrane	90	259	4.7e-19	1.8e-17	0.34749
GO:0042170	C	plastid membrane	91	265	5.6e-19	2.1e-17	0.343396
GO:0030120	C	vesicle coat	12	35	0.0011	0.02	0.342857
GO:0009535	C	chloroplast thylakoid membrane	132	400	1.3e-25	6e-24	0.33
GO:0055035	C	plastid thylakoid membrane	132	401	1.6e-25	7e-24	0.329177
GO:0042651	C	thylakoid membrane	138	421	1.7e-26	8.7e-25	0.327791
GO:0034357	C	photosynthetic membrane	138	422	2e-26	1e-24	0.327014
GO:0009526	C	plastid envelope	223	707	3.4e-40	3.1e-38	0.315417
GO:0009941	C	chloroplast envelope	217	688	4.1e-39	3.3e-37	0.315407
GO:0044436	C	thylakoid part	145	463	3.8e-26	1.8e-24	0.313175
GO:0009534	C	chloroplast thylakoid	159	508	1.5e-28	8.9e-27	0.312992
GO:0031976	C	plastid thylakoid	159	509	1.8e-28	1e-26	0.312377
GO:0005798	C	Golgi-associated vesicle	12	39	0.0023	0.038	0.307692
GO:0009579	C	thylakoid	177	584	2.8e-30	1.7e-28	0.303082
GO:0044434	C	chloroplast part	418	1419	3e-69	9.2e-67	0.294574
GO:0009521	C	photosystem	28	96	1e-05	0.00024	0.291667
GO:0030117	C	membrane coat	14	48	0.0016	0.028	0.291667
GO:0048475	C	coated membrane	14	48	0.0016	0.028	0.291667
GO:0044435	C	plastid part	421	1455	6.5e-68	1.7e-65	0.289347
GO:0031984	C	organelle subcompartment	233	817	3e-36	1.9e-34	0.28519
GO:0005741	C	mitochondrial outer membrane	14	51	0.0026	0.041	0.27451
GO:0031968	C	organelle outer membrane	28	105	4.1e-05	0.00091	0.266667
GO:0009570	C	chloroplast stroma	197	740	1.5e-27	8.3e-26	0.266216
GO:0019867	C	outer membrane	28	107	5.4e-05	0.0012	0.261682
GO:0031975	C	envelope	305	1170	4.7e-41	4.6e-39	0.260684
GO:0031967	C	organelle envelope	305	1170	4.7e-41	4.6e-39	0.260684
GO:0009532	C	plastid stroma	200	774	1.4e-26	7.3e-25	0.258398
GO:0005802	C	trans-Golgi network	66	256	1.3e-09	3.4e-08	0.257812
GO:0015629	C	actin cytoskeleton	18	73	0.0019	0.032	0.246575
GO:0030136	C	clathrin-coated vesicle	17	69	0.0025	0.041	0.246377
GO:0030135	C	coated vesicle	24	98	0.00041	0.0079	0.244898
GO:0098791	C	Golgi subcompartment	72	303	4.5e-09	1.1e-07	0.237624
GO:0009524	C	phragmoplast	21	91	0.0017	0.029	0.230769
GO:0005768	C	endosome	93	405	1.2e-10	3.6e-09	0.22963
GO:0019866	C	organelle inner membrane	84	371	1.7e-09	4.5e-08	0.226415
GO:0044431	C	Golgi apparatus part	127	567	2.4e-13	7.6e-12	0.223986
GO:0031090	C	organelle membrane	394	1760	5.9e-40	5e-38	0.223864
GO:0005829	C	cytosol	444	1993	7.8e-45	8.6e-43	0.22278
GO:0098805	C	whole membrane	206	925	1.1e-20	4.4e-19	0.222703
GO:0044437	C	vacuolar part	161	725	2.6e-16	9e-15	0.222069
GO:0005774	C	vacuolar membrane	159	720	6.2e-16	2.1e-14	0.220833
GO:0031977	C	thylakoid lumen	21	96	0.003	0.046	0.21875
GO:0098588	C	bounding membrane of organelle	264	1213	4.5e-25	2e-23	0.217642
GO:0000139	C	Golgi membrane	80	374	3.5e-08	8.7e-07	0.213904
GO:0098797	C	plasma membrane protein complex	22	103	0.0031	0.048	0.213592
GO:0005635	C	nuclear envelope	26	122	0.0014	0.025	0.213115
GO:0005794	C	Golgi apparatus	242	1182	4.5e-20	1.7e-18	0.204738
GO:0005773	C	vacuole	277	1359	1.2e-22	5.1e-21	0.203826
GO:0031988	C	membrane-bounded vesicle	31	155	0.0013	0.023	0.2
GO:0016023	C	cytoplasmic, membrane-bounded vesicle	30	151	0.0017	0.029	0.198675
GO:0009507	C	chloroplast	821	4148	1.1e-67	2.4e-65	0.197927
GO:0009536	C	plastid	829	4213	1.9e-67	3.6e-65	0.196772
GO:0044446	C	intracellular organelle part	938	4882	1.1e-73	5.4e-71	0.192134
GO:0044422	C	organelle part	939	4894	1.6e-73	6.1e-71	0.191868
GO:0044429	C	mitochondrial part	90	486	1.3e-06	3.2e-05	0.185185
GO:0009506	C	plasmodesma	165	899	1.1e-10	3.2e-09	0.183537
GO:0055044	C	symplast	165	899	1.1e-10	3.2e-09	0.183537
GO:0005911	C	cell-cell junction	165	901	1.2e-10	3.5e-09	0.18313
GO:0030054	C	cell junction	165	901	1.2e-10	3.5e-09	0.18313
GO:0031966	C	mitochondrial membrane	66	362	4.9e-05	0.0011	0.18232
GO:0044430	C	cytoskeletal part	55	302	0.0002	0.0042	0.182119
GO:0098796	C	membrane protein complex	108	597	3.3e-07	8.1e-06	0.180905
GO:0005740	C	mitochondrial envelope	68	376	4.7e-05	0.001	0.180851
GO:0005856	C	cytoskeleton	68	380	6.3e-05	0.0013	0.178947
GO:0012505	C	endomembrane system	383	2143	5.5e-22	2.3e-20	0.178721
GO:0005743	C	mitochondrial inner membrane	48	287	0.0024	0.038	0.167247
GO:0048046	C	apoplast	79	486	0.00027	0.0053	0.162551
GO:0005886	C	plasma membrane	580	3735	1.2e-20	4.9e-19	0.155288
GO:0044444	C	cytoplasmic part	1692	10923	2.9e-85	2.2e-82	0.154902
GO:0044459	C	plasma membrane part	66	428	0.0026	0.041	0.154206
GO:0043234	C	protein complex	279	1834	3e-09	7.6e-08	0.152126
GO:0016020	C	membrane	1291	8532	1e-49	1.2e-47	0.151313
GO:0071944	C	cell periphery	633	4309	1e-17	3.7e-16	0.146902
GO:0005783	C	endoplasmic reticulum	131	895	0.00022	0.0045	0.146369
GO:1902494	C	catalytic complex	104	711	0.00096	0.018	0.146273
GO:0005737	C	cytoplasm	1957	13406	4.7e-87	7.3e-84	0.145979
GO:0044425	C	membrane part	824	5962	3e-17	1e-15	0.138209
GO:0031224	C	intrinsic component of membrane	748	5540	2.1e-13	6.7e-12	0.135018
GO:0016021	C	integral component of membrane	717	5324	1.3e-12	4.2e-11	0.134673
GO:0032991	C	macromolecular complex	349	2658	1.7e-05	0.0004	0.131302
GO:0043227	C	membrane-bounded organelle	2241	18217	1.4e-38	1.1e-36	0.123017
GO:0043231	C	intracellular membrane-bounded organelle	2239	18205	2.2e-38	1.6e-36	0.122988
GO:0044424	C	intracellular part	2541	20693	5.6e-60	7.2e-58	0.122795
GO:0005622	C	intracellular	2544	20721	3.4e-60	4.7e-58	0.122774
GO:0043226	C	organelle	2266	18527	1.2e-37	8.2e-36	0.122308
GO:0043229	C	intracellular organelle	2264	18517	2e-37	1.3e-35	0.122266
GO:0044464	C	cell part	2706	22662	4.1e-63	7.1e-61	0.119407
GO:0005623	C	cell	2706	22664	4.8e-63	7.3e-61	0.119396

## Sheet: GO-LC_down_regulated_genes
Table S3: GO terms enriched in the A. thaliana low CO2 down-regulated genes (p-value<0.05).
GO term	Ontology	Description	Number in input list	Number in BG/Ref	p-value	FDR	Enrich Factor
GO:0044273	P	sulfur compound catabolic process	15	34	1.9e-05	0.0038	0.441176
GO:2000022	P	regulation of jasmonic acid mediated signaling pathway	11	26	0.00032	0.039	0.423077
GO:0019761	P	glucosinolate biosynthetic process	15	44	0.0002	0.027	0.340909
GO:0019758	P	glycosinolate biosynthetic process	15	44	0.0002	0.027	0.340909
GO:0019757	P	glycosinolate metabolic process	28	99	8.6e-06	0.002	0.282828
GO:0019760	P	glucosinolate metabolic process	28	99	8.6e-06	0.002	0.282828
GO:0006575	P	cellular modified amino acid metabolic process	19	69	0.0003	0.038	0.275362
GO:0006694	P	steroid biosynthetic process	22	82	0.00014	0.022	0.268293
GO:1901607	P	alpha-amino acid biosynthetic process	41	154	3.1e-07	0.00012	0.266234
GO:0009741	P	response to brassinosteroid	25	95	6.9e-05	0.011	0.263158
GO:0044272	P	sulfur compound biosynthetic process	27	113	0.00014	0.022	0.238938
GO:0008202	P	steroid metabolic process	26	110	0.00022	0.029	0.236364
GO:0009734	P	auxin-activated signaling pathway	43	190	6.1e-06	0.0015	0.226316
GO:0071365	P	cellular response to auxin stimulus	46	206	4e-06	0.0011	0.223301
GO:0009611	P	response to wounding	46	217	1.3e-05	0.0027	0.211982
GO:0009739	P	response to gibberellin	32	152	0.00028	0.035	0.210526
GO:0071407	P	cellular response to organic cyclic compound	39	187	7.6e-05	0.012	0.208556
GO:1901605	P	alpha-amino acid metabolic process	50	242	1e-05	0.0023	0.206612
GO:0010817	P	regulation of hormone levels	51	251	1.2e-05	0.0026	0.203187
GO:0009753	P	response to jasmonic acid	45	225	5.4e-05	0.0092	0.2
GO:0031669	P	cellular response to nutrient levels	34	170	0.00041	0.048	0.2
GO:0006790	P	sulfur compound metabolic process	57	286	6.5e-06	0.0016	0.199301
GO:0040008	P	regulation of growth	53	276	3.2e-05	0.0062	0.192029
GO:0016053	P	organic acid biosynthetic process	93	531	1.5e-06	0.00048	0.175141
GO:0009755	P	hormone-mediated signaling pathway	143	821	3.5e-09	2.2e-06	0.174178
GO:0014070	P	response to organic cyclic compound	70	405	4.1e-05	0.0076	0.17284
GO:0009733	P	response to auxin	70	407	4.7e-05	0.0084	0.17199
GO:0071495	P	cellular response to endogenous stimulus	153	890	2.1e-09	1.6e-06	0.17191
GO:0071310	P	cellular response to organic substance	175	1023	2e-10	2.1e-07	0.171065
GO:0032870	P	cellular response to hormone stimulus	150	879	4.7e-09	2.8e-06	0.170648
GO:0070887	P	cellular response to chemical stimulus	194	1176	2.9e-10	2.8e-07	0.164966
GO:0009725	P	response to hormone	265	1631	5.4e-13	8.5e-10	0.162477
GO:0044283	P	small molecule biosynthetic process	106	653	6.1e-06	0.0015	0.162328
GO:0071396	P	cellular response to lipid	66	409	0.00037	0.044	0.161369
GO:0006082	P	organic acid metabolic process	177	1099	8.4e-09	4.4e-06	0.161056
GO:0044712	P	single-organism catabolic process	94	585	2.8e-05	0.0056	0.160684
GO:0010033	P	response to organic substance	325	2023	3.4e-15	6.4e-12	0.160652
GO:0009719	P	response to endogenous stimulus	277	1732	7.5e-13	1e-09	0.159931
GO:0048583	P	regulation of response to stimulus	90	565	5.5e-05	0.0092	0.159292
GO:1901701	P	cellular response to oxygen-containing compound	101	635	2.1e-05	0.0042	0.159055
GO:0043436	P	oxoacid metabolic process	153	973	3.2e-07	0.00012	0.157246
GO:0071555	P	cell wall organization	81	518	0.00021	0.029	0.156371
GO:0019752	P	carboxylic acid metabolic process	133	864	4.9e-06	0.0013	0.153935
GO:0042221	P	response to chemical	438	2853	2.3e-17	7.3e-14	0.153523
GO:0040007	P	growth	104	678	5.7e-05	0.0095	0.153392
GO:0044281	P	small molecule metabolic process	244	1597	9.2e-10	7.9e-07	0.152786
GO:0045229	P	external encapsulating structure organization	84	551	0.00033	0.04	0.15245
GO:1901700	P	response to oxygen-containing compound	234	1557	7.3e-09	4.1e-06	0.150289
GO:0006629	P	lipid metabolic process	147	994	1e-05	0.0023	0.147887
GO:0009314	P	response to radiation	113	772	0.00015	0.023	0.146373
GO:0071554	P	cell wall organization or biogenesis	103	704	0.00029	0.037	0.146307
GO:0001101	P	response to acid chemical	172	1181	4.1e-06	0.0011	0.145639
GO:0009628	P	response to abiotic stimulus	294	2022	1.5e-09	1.2e-06	0.145401
GO:0009416	P	response to light stimulus	107	744	0.00039	0.046	0.143817
GO:0009056	P	catabolic process	202	1430	3.6e-06	0.001	0.141259
GO:0007154	P	cell communication	311	2223	1.7e-08	8.2e-06	0.139901
GO:0009605	P	response to external stimulus	220	1582	3.5e-06	0.001	0.139064
GO:0044248	P	cellular catabolic process	142	1024	0.00021	0.029	0.138672
GO:1901575	P	organic substance catabolic process	173	1249	4.7e-05	0.0084	0.138511
GO:0007165	P	signal transduction	268	1965	1.1e-06	0.0004	0.136387
GO:0051716	P	cellular response to stimulus	389	2856	3.5e-09	2.2e-06	0.136204
GO:0044710	P	single-organism metabolic process	540	3970	1.5e-12	1.8e-09	0.13602
GO:0050896	P	response to stimulus	849	6250	1.3e-20	6.3e-17	0.13584
GO:0044700	P	single organism signaling	271	1995	1.3e-06	0.00045	0.13584
GO:0023052	P	signaling	271	1997	1.4e-06	0.00046	0.135704
GO:0009607	P	response to biotic stimulus	168	1253	0.00025	0.033	0.134078
GO:0044711	P	single-organism biosynthetic process	229	1735	4.8e-05	0.0084	0.131988
GO:0055114	P	oxidation-reduction process	206	1566	0.00014	0.021	0.131545
GO:0044763	P	single-organism cellular process	856	6591	5.6e-16	1.3e-12	0.129874
GO:0006796	P	phosphate-containing compound metabolic process	224	1735	0.00019	0.027	0.129107
GO:0006950	P	response to stress	451	3506	1e-07	4.6e-05	0.128637
GO:0006793	P	phosphorus metabolic process	225	1751	0.00023	0.03	0.128498
GO:0044699	P	single-organism process	1197	9448	6.1e-21	5.7e-17	0.126693
GO:0006464	P	cellular protein modification process	268	2126	0.00018	0.026	0.126058
GO:0036211	P	protein modification process	268	2126	0.00018	0.026	0.126058
GO:0050789	P	regulation of biological process	650	5306	6.8e-08	3.2e-05	0.122503
GO:0050794	P	regulation of cellular process	584	4857	3.5e-06	0.001	0.120239
GO:0065007	P	biological regulation	726	6062	2.2e-07	9.5e-05	0.119762
GO:0008152	P	metabolic process	1342	12035	4.5e-07	0.00017	0.111508
GO:0009987	P	cellular process	1415	12771	5.7e-07	0.00021	0.110798
GO:0071704	P	organic substance metabolic process	1178	10672	3.3e-05	0.0062	0.110382
GO:0010181	F	FMN binding	12	35	0.0008	0.05	0.342857
GO:0015295	F	solute:proton symporter activity	23	97	0.00047	0.044	0.237113
GO:0015294	F	solute:cation symporter activity	30	128	8.5e-05	0.013	0.234375
GO:0015293	F	symporter activity	40	171	6.5e-06	0.0024	0.233918
GO:0005402	F	cation:sugar symporter activity	22	95	0.00081	0.05	0.231579
GO:0005351	F	sugar:proton symporter activity	22	95	0.00081	0.05	0.231579
GO:0004553	F	hydrolase activity, hydrolyzing O-glycosyl compounds	74	405	4.8e-06	0.0021	0.182716
GO:0016798	F	hydrolase activity, acting on glycosyl bonds	80	438	2e-06	0.0013	0.182648
GO:0030246	F	carbohydrate binding	55	303	8.7e-05	0.013	0.181518
GO:0008092	F	cytoskeletal protein binding	47	270	0.00061	0.045	0.174074
GO:0042578	F	phosphoric ester hydrolase activity	63	391	0.00051	0.045	0.161125
GO:0046983	F	protein dimerization activity	91	567	3.9e-05	0.0092	0.160494
GO:0048037	F	cofactor binding	71	451	0.00042	0.041	0.157428
GO:0008324	F	cation transmembrane transporter activity	73	464	0.00036	0.036	0.157328
GO:0022804	F	active transmembrane transporter activity	88	595	0.00058	0.045	0.147899
GO:0004674	F	protein serine/threonine kinase activity	110	767	0.00036	0.036	0.143416
GO:0022857	F	transmembrane transporter activity	163	1146	2.3e-05	0.0066	0.142234
GO:0005515	F	protein binding	500	3669	1e-11	1.3e-08	0.136277
GO:0016788	F	hydrolase activity, acting on ester bonds	154	1131	0.00024	0.027	0.136163
GO:0016491	F	oxidoreductase activity	205	1547	9.8e-05	0.013	0.132515
GO:0005215	F	transporter activity	186	1406	0.00022	0.026	0.13229
GO:0016787	F	hydrolase activity	426	3279	9.3e-08	8e-05	0.129918
GO:0016301	F	kinase activity	185	1436	0.00073	0.048	0.12883
GO:0003824	F	catalytic activity	1164	9101	1.7e-21	4.4e-18	0.127898
GO:0005524	F	ATP binding	285	2248	7.8e-05	0.013	0.126779
GO:0032559	F	adenyl ribonucleotide binding	297	2364	9.7e-05	0.013	0.125635
GO:0030554	F	adenyl nucleotide binding	297	2366	0.0001	0.013	0.125528
GO:0097367	F	carbohydrate derivative binding	336	2696	5.7e-05	0.011	0.124629
GO:0032553	F	ribonucleotide binding	329	2664	0.00013	0.016	0.123498
GO:0016740	F	transferase activity	467	3791	4.8e-06	0.0021	0.123186
GO:0036094	F	small molecule binding	419	3434	3.6e-05	0.0092	0.122015
GO:0035639	F	purine ribonucleoside triphosphate binding	306	2515	0.00053	0.045	0.12167
GO:0000166	F	nucleotide binding	410	3370	5.6e-05	0.011	0.121662
GO:1901265	F	nucleoside phosphate binding	410	3370	5.6e-05	0.011	0.121662
GO:0001883	F	purine nucleoside binding	316	2612	0.0006	0.045	0.12098
GO:0032550	F	purine ribonucleoside binding	316	2612	0.0006	0.045	0.12098
GO:0032555	F	purine ribonucleotide binding	318	2631	0.00061	0.045	0.120867
GO:0017076	F	purine nucleotide binding	318	2633	0.00064	0.046	0.120775
GO:0032549	F	ribonucleoside binding	316	2617	0.00067	0.047	0.120749
GO:0001882	F	nucleoside binding	316	2618	0.00069	0.047	0.120703
GO:0043167	F	ion binding	450	3821	0.00031	0.034	0.11777
GO:0005488	F	binding	1327	12081	1.3e-05	0.0042	0.109842
GO:0009505	C	plant-type cell wall	88	323	2.4e-14	4.3e-12	0.272446
GO:0030312	C	external encapsulating structure	147	706	2.5e-14	4.3e-12	0.208215
GO:0005618	C	cell wall	147	706	2.5e-14	4.3e-12	0.208215
GO:0005773	C	vacuole	224	1359	1.2e-11	1.8e-09	0.164827
GO:0009506	C	plasmodesma	146	899	1.1e-07	1.2e-05	0.162403
GO:0055044	C	symplast	146	899	1.1e-07	1.2e-05	0.162403
GO:0005911	C	cell-cell junction	146	901	1.3e-07	1.2e-05	0.162042
GO:0030054	C	cell junction	146	901	1.3e-07	1.2e-05	0.162042
GO:0071944	C	cell periphery	670	4309	8.2e-29	9.9e-26	0.155489
GO:0005886	C	plasma membrane	561	3735	1.2e-20	7.3e-18	0.150201
GO:0005576	C	extracellular region	372	2954	9.7e-06	0.00083	0.125931
GO:0016020	C	membrane	1017	8532	2.6e-10	3.5e-08	0.119198
GO:0031224	C	intrinsic component of membrane	646	5540	3e-05	0.0024	0.116606
GO:0016021	C	integral component of membrane	613	5324	0.00018	0.014	0.115139
GO:0044425	C	membrane part	678	5962	0.00025	0.018	0.11372
GO:0044464	C	cell part	2450	22662	1.5e-17	4.7e-15	0.10811
GO:0005623	C	cell	2450	22664	1.6e-17	4.7e-15	0.108101

## Sheet: GO-NH4+_up_regulated_genes
Table S3: GO terms enriched in the A. thalianaNH4+ up-regulated genes (p-value<0.05).
GO term	Ontology	Description	Number in input list	Number in BG/Ref	p-value	FDR	Enrich Factor
GO:0050896	P	response to stimulus	393	4057	2.6e-36	9.8e-33	0.0968696
GO:0006950	P	response to stress	264	2320	1.3e-33	2.5e-30	0.113793
GO:0034641	P	cellular nitrogen compound metabolic process	100	506	4.9e-28	6.3e-25	0.197628
GO:0042180	P	cellular ketone metabolic process	129	882	7.5e-25	7.2e-22	0.146259
GO:0043436	P	oxoacid metabolic process	125	859	6.1e-24	3.7e-21	0.145518
GO:0006082	P	organic acid metabolic process	125	860	6.7e-24	3.7e-21	0.145349
GO:0019752	P	carboxylic acid metabolic process	125	859	6.1e-24	3.7e-21	0.145518
GO:0044262	P	cellular carbohydrate metabolic process	80	417	5.7e-22	2.7e-19	0.191847
GO:0042221	P	response to chemical stimulus	213	2085	1.1e-21	4.7e-19	0.102158
GO:0009628	P	response to abiotic stimulus	166	1471	8.4e-21	3.2e-18	0.112848
GO:0008152	P	metabolic process	709	10614	1.5e-19	5.2e-17	0.0667986
GO:0010035	P	response to inorganic substance	58	279	1.1e-17	3.6e-15	0.207885
GO:0005975	P	carbohydrate metabolic process	109	866	6.8e-17	2e-14	0.125866
GO:0044106	P	cellular amine metabolic process	71	438	3.2e-16	8.7e-14	0.1621
GO:0019748	P	secondary metabolic process	75	489	6.5e-16	1.7e-13	0.153374
GO:0046394	P	carboxylic acid biosynthetic process	66	417	9.7e-15	2.2e-12	0.158273
GO:0016053	P	organic acid biosynthetic process	66	417	9.7e-15	2.2e-12	0.158273
GO:0006519	P	cellular amino acid and derivative metabolic process	88	682	2e-14	4.2e-12	0.129032
GO:0044272	P	sulfur compound biosynthetic process	33	115	6.3e-14	1.3e-11	0.286957
GO:0009308	P	amine metabolic process	72	521	2.5e-13	4.8e-11	0.138196
GO:0006790	P	sulfur metabolic process	44	220	3e-13	5.4e-11	0.2
GO:0016137	P	glycoside metabolic process	30	104	7.6e-13	1.3e-10	0.288462
GO:0006520	P	cellular amino acid metabolic process	63	430	8.2e-13	1.4e-10	0.146512
GO:0009266	P	response to temperature stimulus	67	485	1.7e-12	2.8e-10	0.138144
GO:0044271	P	cellular nitrogen compound biosynthetic process	59	394	2e-12	3e-10	0.149746
GO:0016138	P	glycoside biosynthetic process	26	79	2.1e-12	3.2e-10	0.329114
GO:0016144	P	S-glycoside biosynthetic process	20	41	2.5e-12	3.3e-10	0.487805
GO:0019758	P	glycosinolate biosynthetic process	20	41	2.5e-12	3.3e-10	0.487805
GO:0019761	P	glucosinolate biosynthetic process	20	41	2.5e-12	3.3e-10	0.487805
GO:0016143	P	S-glycoside metabolic process	23	62	5.4e-12	6.5e-10	0.370968
GO:0019757	P	glycosinolate metabolic process	23	62	5.4e-12	6.5e-10	0.370968
GO:0019760	P	glucosinolate metabolic process	23	62	5.4e-12	6.5e-10	0.370968
GO:0032787	P	monocarboxylic acid metabolic process	59	408	7e-12	8.2e-10	0.144608
GO:0034637	P	cellular carbohydrate biosynthetic process	37	177	7.3e-12	8.3e-10	0.20904
GO:0006979	P	response to oxidative stress	51	332	2.7e-11	3e-09	0.153614
GO:0016051	P	carbohydrate biosynthetic process	45	277	7.8e-11	8.4e-09	0.162455
GO:0010038	P	response to metal ion	41	238	1.1e-10	1.2e-08	0.172269
GO:0044237	P	cellular metabolic process	548	8722	6.3e-10	6.4e-08	0.0628296
GO:0009409	P	response to cold	47	328	1.2e-09	1.2e-07	0.143293
GO:0009309	P	amine biosynthetic process	38	229	1.3e-09	1.3e-07	0.165939
GO:0006970	P	response to osmotic stress	53	408	2.5e-09	2.3e-07	0.129902
GO:0006629	P	lipid metabolic process	85	841	4.3e-09	3.9e-07	0.10107
GO:0009607	P	response to biotic stimulus	70	638	5.2e-09	4.5e-07	0.109718
GO:0009987	P	cellular process	697	11684	5.1e-09	4.5e-07	0.0596542
GO:0015979	P	photosynthesis	30	162	8e-09	6.8e-07	0.185185
GO:0044248	P	cellular catabolic process	77	746	1e-08	8.4e-07	0.103217
GO:0051707	P	response to other organism	66	599	1.2e-08	9.7e-07	0.110184
GO:0051186	P	cofactor metabolic process	43	308	1.2e-08	9.7e-07	0.13961
GO:0006066	P	alcohol metabolic process	39	270	2.5e-08	2e-06	0.144444
GO:0018130	P	heterocycle biosynthetic process	25	123	2.8e-08	2.2e-06	0.203252
GO:0006091	P	generation of precursor metabolites and energy	40	285	3.4e-08	2.5e-06	0.140351
GO:0009414	P	response to water deprivation	35	229	3.7e-08	2.7e-06	0.152838
GO:0046395	P	carboxylic acid catabolic process	22	98	4.2e-08	2.9e-06	0.22449
GO:0016054	P	organic acid catabolic process	22	98	4.2e-08	2.9e-06	0.22449
GO:0009611	P	response to wounding	32	197	4.1e-08	2.9e-06	0.162437
GO:0008610	P	lipid biosynthetic process	52	439	5.4e-08	3.7e-06	0.118451
GO:0016052	P	carbohydrate catabolic process	25	128	5.6e-08	3.8e-06	0.195312
GO:0009415	P	response to water	35	240	1e-07	6.9e-06	0.145833
GO:0009063	P	cellular amino acid catabolic process	15	47	1.3e-07	8.6e-06	0.319149
GO:0044275	P	cellular carbohydrate catabolic process	24	125	1.4e-07	8.6e-06	0.192
GO:0009605	P	response to external stimulus	50	429	1.5e-07	9.4e-06	0.11655
GO:0044255	P	cellular lipid metabolic process	64	618	1.6e-07	9.7e-06	0.10356
GO:0009651	P	response to salt stress	45	366	1.6e-07	9.7e-06	0.122951
GO:0046686	P	response to cadmium ion	29	178	1.6e-07	9.7e-06	0.162921
GO:0005996	P	monosaccharide metabolic process	28	168	1.7e-07	1e-05	0.166667
GO:0009791	P	post-embryonic development	70	705	1.8e-07	1.1e-05	0.0992908
GO:0046483	P	heterocycle metabolic process	52	460	2e-07	1.1e-05	0.113043
GO:0008652	P	cellular amino acid biosynthetic process	31	202	2e-07	1.1e-05	0.153465
GO:0006631	P	fatty acid metabolic process	33	225	2.1e-07	1.2e-05	0.146667
GO:0009310	P	amine catabolic process	15	49	2.1e-07	1.2e-05	0.306122
GO:0009657	P	plastid organization	23	119	2.2e-07	1.2e-05	0.193277
GO:0022900	P	electron transport chain	19	88	5.7e-07	3.1e-05	0.215909
GO:0051188	P	cofactor biosynthetic process	29	191	6e-07	3.1e-05	0.151832
GO:0009753	P	response to jasmonic acid stimulus	31	215	6.7e-07	3.5e-05	0.144186
GO:0009642	P	response to light intensity	19	90	7.7e-07	3.9e-05	0.211111
GO:0009719	P	response to endogenous stimulus	92	1068	8.7e-07	4.4e-05	0.0861423
GO:0009416	P	response to light stimulus	60	596	8.9e-07	4.4e-05	0.100671
GO:0009314	P	response to radiation	61	613	1e-06	5e-05	0.0995106
GO:0006006	P	glucose metabolic process	18	86	1.7e-06	8.1e-05	0.209302
GO:0019318	P	hexose metabolic process	22	126	1.8e-06	8.6e-05	0.174603
GO:0009737	P	response to abscisic acid stimulus	43	378	1.9e-06	9.1e-05	0.113757
GO:0009067	P	aspartate family amino acid biosynthetic process	13	45	2.3e-06	0.00011	0.288889
GO:0046164	P	alcohol catabolic process	18	89	2.5e-06	0.00012	0.202247
GO:0006576	P	cellular biogenic amine metabolic process	15	62	2.6e-06	0.00012	0.241935
GO:0009767	P	photosynthetic electron transport chain	13	46	2.8e-06	0.00013	0.282609
GO:0006811	P	ion transport	46	427	3.3e-06	0.00015	0.107728
GO:0006333	P	chromatin assembly or disassembly	17	82	3.6e-06	0.00016	0.207317
GO:0006972	P	hyperosmotic response	15	64	3.7e-06	0.00016	0.234375
GO:0006334	P	nucleosome assembly	14	56	4e-06	0.00017	0.25
GO:0034728	P	nucleosome organization	14	56	4e-06	0.00017	0.25
GO:0006007	P	glucose catabolic process	17	83	4.1e-06	0.00017	0.204819
GO:0051704	P	multi-organism process	70	776	4.2e-06	0.00018	0.0902062
GO:0042440	P	pigment metabolic process	22	134	4.3e-06	0.00018	0.164179
GO:0019320	P	hexose catabolic process	17	84	4.7e-06	0.00019	0.202381
GO:0046365	P	monosaccharide catabolic process	17	84	4.7e-06	0.00019	0.202381
GO:0009644	P	response to high light intensity	14	57	4.8e-06	0.00019	0.245614
GO:0055114	P	oxidation reduction	28	203	4.9e-06	0.00019	0.137931
GO:0005982	P	starch metabolic process	12	41	5.1e-06	0.0002	0.292683
GO:0031497	P	chromatin assembly	14	60	8e-06	0.00031	0.233333
GO:0065004	P	protein-DNA complex assembly	14	60	8e-06	0.00031	0.233333
GO:0065003	P	macromolecular complex assembly	28	210	8.7e-06	0.00033	0.133333
GO:0009853	P	photorespiration	13	52	8.9e-06	0.00033	0.25
GO:0044238	P	primary metabolic process	527	8995	9.8e-06	0.00037	0.0585881
GO:0042538	P	hyperosmotic salinity response	13	54	1.3e-05	0.00046	0.240741
GO:0046148	P	pigment biosynthetic process	19	112	1.3e-05	0.00046	0.169643
GO:0010033	P	response to organic substance	104	1342	1.3e-05	0.00047	0.0774963
GO:0006812	P	cation transport	39	357	1.3e-05	0.00047	0.109244
GO:0006720	P	isoprenoid metabolic process	24	168	1.3e-05	0.00048	0.142857
GO:0009658	P	chloroplast organization	15	73	1.4e-05	0.00051	0.205479
GO:0006323	P	DNA packaging	14	64	1.5e-05	0.00053	0.21875
GO:0010876	P	lipid localization	9	24	1.5e-05	0.00053	0.375
GO:0006721	P	terpenoid metabolic process	20	126	1.8e-05	0.00062	0.15873
GO:0000302	P	response to reactive oxygen species	16	85	2e-05	0.00067	0.188235
GO:0006090	P	pyruvate metabolic process	9	25	2e-05	0.00067	0.36
GO:0006096	P	glycolysis	13	57	2.1e-05	0.00069	0.22807
GO:0043933	P	macromolecular complex subunit organization	29	235	2.2e-05	0.00074	0.123404
GO:0006633	P	fatty acid biosynthetic process	21	140	2.4e-05	0.00078	0.15
GO:0006996	P	organelle organization	58	640	2.4e-05	0.00078	0.090625
GO:0030001	P	metal ion transport	28	224	2.5e-05	0.00081	0.125
GO:0033554	P	cellular response to stress	41	399	2.9e-05	0.00094	0.102757
GO:0016108	P	tetraterpenoid metabolic process	11	42	3e-05	0.00094	0.261905
GO:0016116	P	carotenoid metabolic process	11	42	3e-05	0.00094	0.261905
GO:0015674	P	di-, tri-valent inorganic cation transport	11	43	3.6e-05	0.0011	0.255814
GO:0008299	P	isoprenoid biosynthetic process	20	135	4.3e-05	0.0013	0.148148
GO:0050801	P	ion homeostasis	17	103	4.8e-05	0.0015	0.165049
GO:0019684	P	photosynthesis, light reaction	17	103	4.8e-05	0.0015	0.165049
GO:0006952	P	defense response	65	766	5.1e-05	0.0015	0.0848564
GO:0043094	P	cellular metabolic compound salvage	14	73	5.4e-05	0.0016	0.191781
GO:0015672	P	monovalent inorganic cation transport	18	115	5.5e-05	0.0016	0.156522
GO:0010043	P	response to zinc ion	6	10	5.8e-05	0.0017	0.6
GO:0016114	P	terpenoid biosynthetic process	16	94	5.8e-05	0.0017	0.170213
GO:0034614	P	cellular response to reactive oxygen species	6	10	5.8e-05	0.0017	0.6
GO:0034622	P	cellular macromolecular complex assembly	25	200	6.6e-05	0.0019	0.125
GO:0055066	P	di-, tri-valent inorganic cation homeostasis	13	65	6.8e-05	0.0019	0.2
GO:0022607	P	cellular component assembly	30	265	7e-05	0.002	0.113208
GO:0015994	P	chlorophyll metabolic process	13	66	7.7e-05	0.0022	0.19697
GO:0031407	P	oxylipin metabolic process	10	39	8e-05	0.0022	0.25641
GO:0010439	P	regulation of glucosinolate biosynthetic process	5	6	8.4e-05	0.0023	0.833333
GO:0016119	P	carotene metabolic process	7	17	8.6e-05	0.0024	0.411765
GO:0009058	P	biosynthetic process	312	5118	8.6e-05	0.0024	0.0609613
GO:0034599	P	cellular response to oxidative stress	6	11	8.5e-05	0.0024	0.545455
GO:0006778	P	porphyrin metabolic process	15	89	0.00011	0.0029	0.168539
GO:0031163	P	metallo-sulfur cluster assembly	8	25	0.00011	0.0031	0.32
GO:0016226	P	iron-sulfur cluster assembly	8	25	0.00011	0.0031	0.32
GO:0042214	P	terpene metabolic process	11	50	0.00012	0.0031	0.22
GO:0016109	P	tetraterpenoid biosynthetic process	9	33	0.00012	0.0031	0.272727
GO:0006575	P	cellular amino acid derivative metabolic process	33	315	0.00012	0.0031	0.104762
GO:0016117	P	carotenoid biosynthetic process	9	33	0.00012	0.0031	0.272727
GO:0009066	P	aspartate family amino acid metabolic process	15	90	0.00012	0.0031	0.166667
GO:0055080	P	cation homeostasis	15	90	0.00012	0.0031	0.166667
GO:0009064	P	glutamine family amino acid metabolic process	10	42	0.00013	0.0034	0.238095
GO:0043255	P	regulation of carbohydrate biosynthetic process	5	7	0.00014	0.0035	0.714286
GO:0034621	P	cellular macromolecular complex subunit organization	26	224	0.00014	0.0036	0.116071
GO:0009694	P	jasmonic acid metabolic process	9	34	0.00015	0.0037	0.264706
GO:0019252	P	starch biosynthetic process	7	19	0.00015	0.0037	0.368421
GO:0042401	P	cellular biogenic amine biosynthetic process	11	52	0.00016	0.0039	0.211538
GO:0033013	P	tetrapyrrole metabolic process	15	93	0.00017	0.004	0.16129
GO:0010675	P	regulation of cellular carbohydrate metabolic process	6	13	0.00017	0.0042	0.461538
GO:0042762	P	regulation of sulfur metabolic process	6	13	0.00017	0.0042	0.461538
GO:0042542	P	response to hydrogen peroxide	11	53	0.00018	0.0044	0.207547
GO:0051716	P	cellular response to stimulus	67	840	0.00021	0.005	0.0797619
GO:0043155	P	negative regulation of photosynthesis, light reaction	5	8	0.00022	0.0051	0.625
GO:0010205	P	photoinhibition	5	8	0.00022	0.0051	0.625
GO:0006873	P	cellular ion homeostasis	15	96	0.00023	0.0053	0.15625
GO:0055082	P	cellular chemical homeostasis	15	97	0.00025	0.0058	0.154639
GO:0006814	P	sodium ion transport	7	21	0.00025	0.0058	0.333333
GO:0009725	P	response to hormone stimulus	75	982	0.0003	0.007	0.0763747
GO:0006109	P	regulation of carbohydrate metabolic process	6	15	0.00032	0.0073	0.4
GO:0044249	P	cellular biosynthetic process	296	4925	0.00033	0.0075	0.0601015
GO:0009110	P	vitamin biosynthetic process	13	78	0.00033	0.0075	0.166667
GO:0009408	P	response to heat	20	161	0.00037	0.0082	0.124224
GO:0030005	P	cellular di-, tri-valent inorganic cation homeostasis	11	59	0.00041	0.0091	0.186441
GO:0016122	P	xanthophyll metabolic process	6	16	0.00042	0.0093	0.375
GO:0042592	P	homeostatic process	24	216	0.00045	0.0099	0.111111
GO:0016120	P	carotene biosynthetic process	5	10	0.00046	0.01	0.5
GO:0042398	P	cellular amino acid derivative biosynthetic process	25	233	0.00055	0.012	0.107296
GO:0006807	P	nitrogen compound metabolic process	234	3826	0.00063	0.013	0.0611605
GO:0030003	P	cellular cation homeostasis	13	84	0.00062	0.013	0.154762
GO:0046246	P	terpene biosynthetic process	8	34	0.00067	0.014	0.235294
GO:0019438	P	aromatic compound biosynthetic process	25	237	0.00069	0.015	0.105485
GO:0010109	P	regulation of photosynthesis	6	18	0.0007	0.015	0.333333
GO:0006073	P	cellular glucan metabolic process	13	87	0.00084	0.018	0.149425
GO:0006546	P	glycine catabolic process	5	12	0.00088	0.018	0.416667
GO:0009071	P	serine family amino acid catabolic process	5	12	0.00088	0.018	0.416667
GO:0019725	P	cellular homeostasis	20	174	0.00089	0.018	0.114943
GO:0006081	P	cellular aldehyde metabolic process	7	27	0.00089	0.018	0.259259
GO:0048878	P	chemical homeostasis	17	136	0.00092	0.019	0.125
GO:0006800	P	oxygen and reactive oxygen species metabolic process	11	66	0.00093	0.019	0.166667
GO:0051276	P	chromosome organization	23	216	0.00099	0.02	0.106481
GO:0044042	P	glucan metabolic process	13	89	0.001	0.02	0.146067
GO:0042742	P	defense response to bacterium	20	177	0.0011	0.022	0.112994
GO:0006813	P	potassium ion transport	8	37	0.0011	0.022	0.216216
GO:0006775	P	fat-soluble vitamin metabolic process	6	20	0.0011	0.022	0.3
GO:0042362	P	fat-soluble vitamin biosynthetic process	6	20	0.0011	0.022	0.3
GO:0042435	P	indole derivative biosynthetic process	9	47	0.0011	0.022	0.191489
GO:0019288	P	isopentenyl diphosphate biosynthetic process, mevalonate-independent pathway	5	13	0.0012	0.023	0.384615
GO:0009617	P	response to bacterium	25	247	0.0012	0.023	0.101215
GO:0006536	P	glutamate metabolic process	5	13	0.0012	0.023	0.384615
GO:0019682	P	glyceraldehyde-3-phosphate metabolic process	5	13	0.0012	0.023	0.384615
GO:0046700	P	heterocycle catabolic process	8	38	0.0013	0.024	0.210526
GO:0009695	P	jasmonic acid biosynthetic process	7	29	0.0013	0.024	0.241379
GO:0009631	P	cold acclimation	7	29	0.0013	0.024	0.241379
GO:0009991	P	response to extracellular stimulus	15	117	0.0014	0.027	0.128205
GO:0009684	P	indoleacetic acid biosynthetic process	5	14	0.0015	0.029	0.357143
GO:0016311	P	dephosphorylation	13	94	0.0016	0.029	0.138298
GO:0009411	P	response to UV	12	83	0.0017	0.031	0.144578
GO:0009683	P	indoleacetic acid metabolic process	5	15	0.002	0.036	0.333333
GO:0042548	P	regulation of photosynthesis, light reaction	5	15	0.002	0.036	0.333333
GO:0006732	P	coenzyme metabolic process	20	188	0.0021	0.038	0.106383
GO:0031408	P	oxylipin biosynthetic process	7	32	0.0021	0.038	0.21875
GO:0031668	P	cellular response to extracellular stimulus	13	98	0.0022	0.04	0.132653
GO:0042434	P	indole derivative metabolic process	9	53	0.0024	0.042	0.169811
GO:0042430	P	indole and derivative metabolic process	9	53	0.0024	0.042	0.169811
GO:0009404	P	toxin metabolic process	9	53	0.0024	0.042	0.169811
GO:0009407	P	toxin catabolic process	9	53	0.0024	0.042	0.169811
GO:0015977	P	carbon fixation	5	16	0.0025	0.044	0.3125
GO:0009069	P	serine family amino acid metabolic process	9	54	0.0027	0.047	0.166667
GO:0005976	P	polysaccharide metabolic process	17	152	0.0027	0.047	0.111842
GO:0003824	F	catalytic activity	796	9638	2.5e-55	3.6e-52	0.0825897
GO:0016491	F	oxidoreductase activity	194	1463	4.6e-32	3.3e-29	0.132604
GO:0016614	F	oxidoreductase activity, acting on CH-OH group of donors	39	188	2.5e-12	1.2e-09	0.207447
GO:0016616	F	oxidoreductase activity, acting on the CH-OH group of donors, NAD or NADP as acceptor	33	145	1.4e-11	5.1e-09	0.227586
GO:0016787	F	hydrolase activity	259	3468	9.1e-11	2.6e-08	0.0746828
GO:0022857	F	transmembrane transporter activity	104	1128	7.5e-09	1.8e-06	0.0921986
GO:0022804	F	active transmembrane transporter activity	69	664	4.6e-08	9.6e-06	0.103916
GO:0016853	F	isomerase activity	37	265	1.2e-07	2.2e-05	0.139623
GO:0015291	F	secondary active transmembrane transporter activity	43	345	2.1e-07	3.5e-05	0.124638
GO:0005215	F	transporter activity	119	1477	5.5e-07	8e-05	0.0805687
GO:0016829	F	lyase activity	48	430	8.1e-07	0.00011	0.111628
GO:0016903	F	oxidoreductase activity, acting on the aldehyde or oxo group of donors	18	84	1.2e-06	0.00015	0.214286
GO:0016835	F	carbon-oxygen lyase activity	25	163	3e-06	0.00033	0.153374
GO:0015075	F	ion transmembrane transporter activity	62	655	3.7e-06	0.00039	0.0946565
GO:0016740	F	transferase activity	221	3321	8.7e-06	0.00084	0.0665462
GO:0008324	F	cation transmembrane transporter activity	50	503	9.6e-06	0.00087	0.0994036
GO:0022891	F	substrate-specific transmembrane transporter activity	77	908	1.1e-05	0.00089	0.0848018
GO:0008237	F	metallopeptidase activity	17	90	1.1e-05	0.00089	0.188889
GO:0019825	F	oxygen binding	31	255	1.6e-05	0.0012	0.121569
GO:0015297	F	antiporter activity	24	170	1.6e-05	0.0012	0.141176
GO:0016620	F	oxidoreductase activity, acting on the aldehyde or oxo group of donors, NAD or NADP as acceptor	13	56	1.8e-05	0.0012	0.232143
GO:0016209	F	antioxidant activity	22	150	2.1e-05	0.0014	0.146667
GO:0016836	F	hydro-lyase activity	17	97	2.5e-05	0.0016	0.175258
GO:0048037	F	cofactor binding	29	246	4.8e-05	0.0029	0.117886
GO:0016774	F	phosphotransferase activity, carboxyl group as acceptor	6	11	8.5e-05	0.005	0.545455
GO:0022892	F	substrate-specific transporter activity	82	1059	0.00011	0.0061	0.0774315
GO:0016860	F	intramolecular oxidoreductase activity	12	60	0.00013	0.0069	0.2
GO:0016861	F	intramolecular oxidoreductase activity, interconverting aldoses and ketoses	7	22	0.00032	0.016	0.318182
GO:0022890	F	inorganic cation transmembrane transporter activity	25	228	0.00041	0.021	0.109649
GO:0016627	F	oxidoreductase activity, acting on the CH-CH group of donors	14	93	0.0005	0.023	0.150538
GO:0008168	F	methyltransferase activity	28	273	0.00052	0.023	0.102564
GO:0003684	F	damaged DNA binding	8	32	0.00047	0.023	0.25
GO:0050662	F	coenzyme binding	22	191	0.00049	0.023	0.115183
GO:0016741	F	transferase activity, transferring one-carbon groups	28	275	0.00057	0.025	0.101818
GO:0046873	F	metal ion transmembrane transporter activity	20	168	0.0006	0.025	0.119048
GO:0015038	F	glutathione disulfide oxidoreductase activity	5	11	0.00065	0.026	0.454545
GO:0015037	F	peptide disulfide oxidoreductase activity	5	11	0.00065	0.026	0.454545
GO:0016765	F	transferase activity, transferring alkyl or aryl (other than methyl) groups	19	158	0.00072	0.028	0.120253
GO:0030414	F	peptidase inhibitor activity	9	44	0.00076	0.028	0.204545
GO:0008483	F	transaminase activity	12	76	0.00085	0.031	0.157895
GO:0008943	F	glyceraldehyde-3-phosphate dehydrogenase activity	5	12	0.00088	0.031	0.416667
GO:0016769	F	transferase activity, transferring nitrogenous groups	12	77	0.00094	0.033	0.155844
GO:0008187	F	poly-pyrimidine tract binding	7	28	0.0011	0.033	0.25
GO:0016788	F	hydrolase activity, acting on ester bonds	85	1200	0.0011	0.033	0.0708333
GO:0051536	F	iron-sulfur cluster binding	8	37	0.0011	0.033	0.216216
GO:0051540	F	metal cluster binding	8	37	0.0011	0.033	0.216216
GO:0008266	F	poly(U) RNA binding	7	28	0.0011	0.033	0.25
GO:0004364	F	glutathione transferase activity	10	57	0.0011	0.033	0.175439
GO:0003727	F	single-stranded RNA binding	8	37	0.0011	0.033	0.216216
GO:0016791	F	phosphatase activity	36	407	0.0012	0.033	0.0884521
GO:0016651	F	oxidoreductase activity, acting on NADH or NADPH	14	103	0.0012	0.035	0.135922
GO:0016628	F	oxidoreductase activity, acting on the CH-CH group of donors, NAD or NADP as acceptor	7	29	0.0013	0.036	0.241379
GO:0016615	F	malate dehydrogenase activity	6	22	0.0017	0.046	0.272727
GO:0042578	F	phosphoric ester hydrolase activity	40	481	0.0018	0.049	0.0831601
GO:0009536	C	plastid	451	2965	7e-96	4.1e-93	0.152108
GO:0009507	C	chloroplast	412	2740	2.6e-85	7.5e-83	0.150365
GO:0005737	C	cytoplasm	703	6822	1.4e-83	2.6e-81	0.103049
GO:0044444	C	cytoplasmic part	661	6289	1.3e-80	1.9e-78	0.105104
GO:0043227	C	membrane-bounded organelle	714	7622	3.2e-68	3.7e-66	0.0936762
GO:0043231	C	intracellular membrane-bounded organelle	712	7615	1.2e-67	1.2e-65	0.0934997
GO:0044424	C	intracellular part	807	9302	1.7e-65	1.4e-63	0.0867555
GO:0005622	C	intracellular	825	9671	2.6e-64	1.9e-62	0.0853066
GO:0043229	C	intracellular organelle	731	8149	8.2e-63	5.3e-61	0.0897043
GO:0043226	C	organelle	731	8155	1.1e-62	6.3e-61	0.0896383
GO:0044435	C	plastid part	176	867	2.8e-50	1.5e-48	0.202999
GO:0044464	C	cell part	1071	15217	7.2e-48	3.2e-46	0.0703818
GO:0005623	C	cell	1071	15217	7.2e-48	3.2e-46	0.0703818
GO:0044434	C	chloroplast part	159	746	9.5e-48	3.9e-46	0.213137
GO:0044422	C	organelle part	269	2562	3.9e-29	1.4e-27	0.104996
GO:0044446	C	intracellular organelle part	269	2561	3.7e-29	1.4e-27	0.105037
GO:0009579	C	thylakoid	84	376	8.2e-27	2.8e-25	0.223404
GO:0009534	C	chloroplast thylakoid	72	290	1.8e-25	5.7e-24	0.248276
GO:0031976	C	plastid thylakoid	72	293	3e-25	9.1e-24	0.245734
GO:0031984	C	organelle subcompartment	72	295	4.2e-25	1.2e-23	0.244068
GO:0044436	C	thylakoid part	72	307	3.1e-24	8.7e-23	0.234528
GO:0031090	C	organelle membrane	121	842	8.5e-23	2.2e-21	0.143705
GO:0042651	C	thylakoid membrane	62	244	1.4e-22	3.6e-21	0.254098
GO:0034357	C	photosynthetic membrane	65	273	2.7e-22	6e-21	0.238095
GO:0009535	C	chloroplast thylakoid membrane	60	231	2.7e-22	6e-21	0.25974
GO:0055035	C	plastid thylakoid membrane	60	231	2.7e-22	6e-21	0.25974
GO:0031975	C	envelope	97	595	7.6e-22	1.6e-20	0.163025
GO:0031967	C	organelle envelope	97	595	7.6e-22	1.6e-20	0.163025
GO:0005739	C	mitochondrion	152	1276	4.3e-21	8.7e-20	0.119122
GO:0009526	C	plastid envelope	69	331	8e-21	1.5e-19	0.208459
GO:0009570	C	chloroplast stroma	59	249	2.8e-20	5.2e-19	0.236948
GO:0009532	C	plastid stroma	65	322	4.5e-19	8.1e-18	0.201863
GO:0009941	C	chloroplast envelope	54	265	3.1e-16	5.4e-15	0.203774
GO:0016020	C	membrane	299	4068	1.3e-11	2.1e-10	0.0735005
GO:0005773	C	vacuole	56	383	1.6e-11	2.7e-10	0.146214
GO:0044429	C	mitochondrial part	40	274	1.3e-08	2.1e-07	0.145985
GO:0010287	C	plastoglobule	20	81	4.5e-08	7e-07	0.246914
GO:0010319	C	stromule	15	49	2.1e-07	3.2e-06	0.306122
GO:0048046	C	apoplast	29	182	2.5e-07	3.7e-06	0.159341
GO:0032993	C	protein-DNA complex	14	44	3.6e-07	5.2e-06	0.318182
GO:0000786	C	nucleosome	13	37	3.7e-07	5.3e-06	0.351351
GO:0031977	C	thylakoid lumen	20	95	4.1e-07	5.7e-06	0.210526
GO:0005576	C	extracellular region	36	285	1.5e-06	2.1e-05	0.126316
GO:0019866	C	organelle inner membrane	31	230	2.4e-06	3.2e-05	0.134783
GO:0031978	C	plastid thylakoid lumen	18	89	2.5e-06	3.2e-05	0.202247
GO:0009543	C	chloroplast thylakoid lumen	18	89	2.5e-06	3.2e-05	0.202247
GO:0000785	C	chromatin	16	71	2.7e-06	3.4e-05	0.225352
GO:0070469	C	respiratory chain	20	115	5.5e-06	6.6e-05	0.173913
GO:0005740	C	mitochondrial envelope	29	223	9.3e-06	0.00011	0.130045
GO:0005694	C	chromosome	25	177	1.1e-05	0.00012	0.141243
GO:0045271	C	respiratory chain complex I	15	72	1.3e-05	0.00014	0.208333
GO:0030964	C	NADH dehydrogenase complex	15	72	1.3e-05	0.00014	0.208333
GO:0031966	C	mitochondrial membrane	27	210	2.2e-05	0.00024	0.128571
GO:0044427	C	chromosomal part	20	133	3.6e-05	0.00039	0.150376
GO:0009528	C	plastid inner membrane	12	57	8.3e-05	0.00088	0.210526
GO:0005618	C	cell wall	39	403	0.00014	0.0015	0.0967742
GO:0042579	C	microbody	21	163	0.00017	0.0017	0.128834
GO:0005777	C	peroxisome	21	163	0.00017	0.0017	0.128834
GO:0030312	C	external encapsulating structure	39	407	0.00017	0.0017	0.0958231
GO:0009706	C	chloroplast inner membrane	11	53	0.00018	0.0018	0.207547
GO:0031980	C	mitochondrial lumen	11	54	0.00021	0.002	0.203704
GO:0005759	C	mitochondrial matrix	11	54	0.00021	0.002	0.203704
GO:0042170	C	plastid membrane	16	117	0.00054	0.005	0.136752
GO:0009523	C	photosystem II	9	45	0.00087	0.0078	0.2
GO:0031969	C	chloroplast membrane	14	99	0.00087	0.0078	0.141414
GO:0030095	C	chloroplast photosystem II	7	29	0.0013	0.011	0.241379
GO:0005743	C	mitochondrial inner membrane	19	172	0.0018	0.015	0.110465
GO:0044439	C	peroxisomal part	6	23	0.002	0.017	0.26087
GO:0044438	C	microbody part	6	23	0.002	0.017	0.26087
GO:0009521	C	photosystem	10	66	0.0029	0.024	0.151515
GO:0044437	C	vacuolar part	13	104	0.0035	0.029	0.125
GO:0070013	C	intracellular organelle lumen	42	539	0.0043	0.034	0.0779221
GO:0043233	C	organelle lumen	42	539	0.0043	0.034	0.0779221
GO:0031974	C	membrane-enclosed lumen	42	546	0.0052	0.041	0.0769231
GO:0005778	C	peroxisomal membrane	5	21	0.0066	0.049	0.238095
GO:0005774	C	vacuolar membrane	12	100	0.0066	0.049	0.12
GO:0031903	C	microbody membrane	5	21	0.0066	0.049	0.238095
GO:0009654	C	oxygen evolving complex	5	21	0.0066	0.049	0.238095

## Sheet: GO-NH4+_down_regulated_genes
Table S3: GO terms enriched in the A. thaliana NH4+ down-regulated genes (p-value<0.05).
GO term	Ontology	Description	Number in input list	Number in BG/Ref	p-value	FDR	Enrich factor
GO:0050896	P	response to stimulus	337	4057	1.9e-16	6e-13	0.0830663
GO:0006468	P	protein amino acid phosphorylation	114	946	1e-14	1.7e-11	0.120507
GO:0016310	P	phosphorylation	119	1079	6.6e-13	7.1e-10	0.110287
GO:0009725	P	response to hormone stimulus	110	982	2.1e-12	1.4e-09	0.112016
GO:0040007	P	growth	56	340	2.2e-12	1.4e-09	0.164706
GO:0010033	P	response to organic substance	136	1342	3.9e-12	2.1e-09	0.101341
GO:0065008	P	regulation of biological quality	83	665	9.4e-12	4.3e-09	0.124812
GO:0006796	P	phosphate metabolic process	122	1178	1.5e-11	5.1e-09	0.103565
GO:0006793	P	phosphorus metabolic process	122	1179	1.6e-11	5.1e-09	0.103478
GO:0009719	P	response to endogenous stimulus	114	1068	1.3e-11	5.1e-09	0.106742
GO:0008361	P	regulation of cell size	47	274	3.8e-11	1.1e-08	0.171533
GO:0032535	P	regulation of cellular component size	47	277	5.2e-11	1.3e-08	0.169675
GO:0090066	P	regulation of anatomical structure size	47	277	5.2e-11	1.3e-08	0.169675
GO:0065007	P	biological regulation	317	4188	7.8e-11	1.8e-08	0.0756925
GO:0016049	P	cell growth	45	265	1.3e-10	2.8e-08	0.169811
GO:0042221	P	response to chemical stimulus	181	2085	1.9e-10	3.7e-08	0.0868106
GO:0043687	P	post-translational protein modification	121	1248	7.5e-10	1.4e-07	0.0969551
GO:0048589	P	developmental growth	41	242	9e-10	1.6e-07	0.169421
GO:0051179	P	localization	159	1922	4.9e-08	8.3e-06	0.0827263
GO:0009664	P	plant-type cell wall organization	20	79	7.7e-08	1.2e-05	0.253165
GO:0006464	P	protein modification process	128	1474	9.6e-08	1.4e-05	0.0868385
GO:0010876	P	lipid localization	12	24	9.1e-08	1.4e-05	0.5
GO:0006810	P	transport	150	1846	3.2e-07	4.5e-05	0.0812568
GO:0009826	P	unidimensional cell growth	30	186	3.9e-07	4.9e-05	0.16129
GO:0051234	P	establishment of localization	150	1851	3.7e-07	4.9e-05	0.0810373
GO:0060560	P	developmental growth involved in morphogenesis	30	186	3.9e-07	4.9e-05	0.16129
GO:0016051	P	carbohydrate biosynthetic process	38	277	4.9e-07	5.9e-05	0.137184
GO:0009733	P	response to auxin stimulus	44	360	1.1e-06	0.00013	0.122222
GO:0009791	P	post-embryonic development	70	705	1.3e-06	0.00015	0.0992908
GO:0043412	P	macromolecule modification	133	1636	1.5e-06	0.00016	0.0812958
GO:0005976	P	polysaccharide metabolic process	25	152	2.6e-06	0.00027	0.164474
GO:0042545	P	cell wall modification	22	123	3.1e-06	0.00031	0.178862
GO:0051704	P	multi-organism process	73	776	4.7e-06	0.00046	0.0940722
GO:0044042	P	glucan metabolic process	18	89	5.5e-06	0.00052	0.202247
GO:0051707	P	response to other organism	60	599	5.8e-06	0.00054	0.100167
GO:0048869	P	cellular developmental process	54	520	6.6e-06	0.00059	0.103846
GO:0009741	P	response to brassinosteroid stimulus	14	56	7.6e-06	0.00067	0.25
GO:0006950	P	response to stress	172	2320	8.2e-06	0.0007	0.0741379
GO:0006955	P	immune response	42	367	8.5e-06	0.0007	0.114441
GO:0002376	P	immune system process	42	368	9e-06	0.00073	0.11413
GO:0009607	P	response to biotic stimulus	62	638	9.7e-06	0.00075	0.0971787
GO:0005975	P	carbohydrate metabolic process	78	866	9.6e-06	0.00075	0.0900693
GO:0000902	P	cell morphogenesis	33	259	1.1e-05	0.00082	0.127413
GO:0045087	P	innate immune response	40	347	1.2e-05	0.00087	0.115274
GO:0015833	P	peptide transport	15	68	1.3e-05	0.00094	0.220588
GO:0006857	P	oligopeptide transport	15	68	1.3e-05	0.00094	0.220588
GO:0050794	P	regulation of cellular process	234	3375	1.5e-05	0.001	0.0693333
GO:0009987	P	cellular process	701	11684	1.7e-05	0.0011	0.0599966
GO:0007166	P	cell surface receptor linked signaling pathway	25	172	1.8e-05	0.0012	0.145349
GO:0009250	P	glucan biosynthetic process	13	54	2.3e-05	0.0015	0.240741
GO:0032870	P	cellular response to hormone stimulus	37	321	2.5e-05	0.0015	0.115265
GO:0009755	P	hormone-mediated signaling pathway	37	321	2.5e-05	0.0015	0.115265
GO:0034637	P	cellular carbohydrate biosynthetic process	25	177	2.7e-05	0.0016	0.141243
GO:0000271	P	polysaccharide biosynthetic process	19	112	2.7e-05	0.0016	0.169643
GO:0033692	P	cellular polysaccharide biosynthetic process	17	92	2.8e-05	0.0016	0.184783
GO:0051716	P	cellular response to stimulus	74	840	3.1e-05	0.0018	0.0880952
GO:0006694	P	steroid biosynthetic process	13	56	3.1e-05	0.0018	0.232143
GO:0008202	P	steroid metabolic process	16	84	3.4e-05	0.0019	0.190476
GO:0050789	P	regulation of biological process	250	3697	3.7e-05	0.002	0.0676224
GO:0009620	P	response to fungus	23	158	3.7e-05	0.002	0.14557
GO:0044264	P	cellular polysaccharide metabolic process	20	127	4.4e-05	0.0023	0.15748
GO:0070887	P	cellular response to chemical stimulus	46	452	4.8e-05	0.0025	0.10177
GO:0006073	P	cellular glucan metabolic process	16	87	4.9e-05	0.0025	0.183908
GO:0050832	P	defense response to fungus	18	108	5.4e-05	0.0027	0.166667
GO:0033037	P	polysaccharide localization	8	21	6.2e-05	0.003	0.380952
GO:0052545	P	callose localization	8	21	6.2e-05	0.003	0.380952
GO:0048583	P	regulation of response to stimulus	25	188	6.5e-05	0.0031	0.132979
GO:0032989	P	cellular component morphogenesis	33	289	7.8e-05	0.0037	0.114187
GO:0006952	P	defense response	67	766	8.8e-05	0.0041	0.0874674
GO:0030243	P	cellulose metabolic process	7	17	0.00012	0.0056	0.411765
GO:0007242	P	intracellular signaling cascade	59	659	0.00013	0.0058	0.0895296
GO:0052542	P	callose deposition during defense response	7	19	0.00021	0.0094	0.368421
GO:0052543	P	callose deposition in cell wall	7	19	0.00021	0.0094	0.368421
GO:0044262	P	cellular carbohydrate metabolic process	41	417	0.00023	0.01	0.0983213
GO:0006629	P	lipid metabolic process	70	841	0.00024	0.01	0.0832342
GO:0032502	P	developmental process	161	2304	0.00025	0.011	0.0698785
GO:0009628	P	response to abiotic stimulus	110	1471	0.00026	0.011	0.0747791
GO:0052386	P	cell wall thickening	7	20	0.00028	0.011	0.35
GO:0009617	P	response to bacterium	28	247	0.00029	0.012	0.11336
GO:0007167	P	enzyme linked receptor protein signaling pathway	19	140	0.00037	0.015	0.135714
GO:0007169	P	transmembrane receptor protein tyrosine kinase signaling pathway	19	140	0.00037	0.015	0.135714
GO:0016128	P	phytosteroid metabolic process	7	22	0.00044	0.017	0.318182
GO:0016131	P	brassinosteroid metabolic process	7	22	0.00044	0.017	0.318182
GO:0022622	P	root system development	28	255	0.00046	0.017	0.109804
GO:0048364	P	root development	28	255	0.00046	0.017	0.109804
GO:0042592	P	homeostatic process	25	216	0.00045	0.017	0.115741
GO:0033036	P	macromolecule localization	43	462	0.00048	0.018	0.0930736
GO:0012501	P	programmed cell death	27	244	0.00052	0.019	0.110656
GO:0009651	P	response to salt stress	36	366	0.00054	0.019	0.0983607
GO:0008219	P	cell death	30	286	0.00059	0.021	0.104895
GO:0016265	P	death	30	286	0.00059	0.021	0.104895
GO:0043401	P	steroid hormone mediated signaling pathway	9	40	0.00062	0.021	0.225
GO:0009742	P	brassinosteroid mediated signaling pathway	9	40	0.00062	0.021	0.225
GO:0048545	P	response to steroid hormone stimulus	9	40	0.00062	0.021	0.225
GO:0009739	P	response to gibberellin stimulus	20	159	0.00064	0.022	0.125786
GO:0016126	P	sterol biosynthetic process	8	32	0.00068	0.023	0.25
GO:0009825	P	multidimensional cell growth	10	50	0.0007	0.023	0.2
GO:0016129	P	phytosteroid biosynthetic process	6	17	0.00073	0.023	0.352941
GO:0052544	P	callose deposition in cell wall during defense response	6	17	0.00073	0.023	0.352941
GO:0016132	P	brassinosteroid biosynthetic process	6	17	0.00073	0.023	0.352941
GO:0052482	P	cell wall thickening during defense response	6	17	0.00073	0.023	0.352941
GO:0051169	P	nuclear transport	12	71	0.00081	0.025	0.169014
GO:0006913	P	nucleocytoplasmic transport	12	71	0.00081	0.025	0.169014
GO:0080134	P	regulation of response to stress	13	83	0.00094	0.029	0.156627
GO:0009653	P	anatomical structure morphogenesis	53	637	0.0013	0.04	0.0832025
GO:0016125	P	sterol metabolic process	8	36	0.0013	0.04	0.222222
GO:0034050	P	host programmed cell death induced by symbiont	10	55	0.0013	0.04	0.181818
GO:0009626	P	plant-type hypersensitive response	10	55	0.0013	0.04	0.181818
GO:0070298	P	negative regulation of two-component signal transduction system (phosphorelay)	5	13	0.0015	0.043	0.384615
GO:0009416	P	response to light stimulus	50	596	0.0015	0.043	0.0838926
GO:0031347	P	regulation of defense response	11	66	0.0015	0.043	0.166667
GO:0010105	P	negative regulation of ethylene mediated signaling pathway	5	13	0.0015	0.043	0.384615
GO:0021700	P	developmental maturation	10	56	0.0015	0.043	0.178571
GO:0006970	P	response to osmotic stress	37	408	0.0017	0.048	0.0906863
GO:0048767	P	root hair elongation	7	29	0.0017	0.048	0.241379
GO:0048856	P	anatomical structure development	120	1726	0.0017	0.048	0.0695249
GO:0019725	P	cellular homeostasis	20	174	0.0017	0.048	0.114943
GO:0044238	P	primary metabolic process	529	8995	0.0018	0.049	0.0588105
GO:0016740	F	transferase activity	303	3321	6.6e-20	8.6e-17	0.0912376
GO:0003824	F	catalytic activity	688	9638	3.7e-19	2.4e-16	0.0713841
GO:0016301	F	kinase activity	170	1641	1.1e-15	4.8e-13	0.103595
GO:0016772	F	transferase activity, transferring phosphorus-containing groups	182	1887	4.5e-14	1.5e-11	0.0964494
GO:0005215	F	transporter activity	149	1477	4.8e-13	1.3e-10	0.10088
GO:0004672	F	protein kinase activity	106	953	7.9e-12	1.7e-09	0.111228
GO:0022892	F	substrate-specific transporter activity	113	1059	1.7e-11	3.1e-09	0.106704
GO:0004674	F	protein serine/threonine kinase activity	81	681	1.4e-10	2.2e-08	0.118943
GO:0016773	F	phosphotransferase activity, alcohol group as acceptor	116	1154	2.5e-10	3.6e-08	0.10052
GO:0016758	F	transferase activity, transferring hexosyl groups	50	340	1.1e-09	1.4e-07	0.147059
GO:0022857	F	transmembrane transporter activity	109	1128	6.3e-09	7.4e-07	0.0966312
GO:0022891	F	substrate-specific transmembrane transporter activity	92	908	1.3e-08	1.4e-06	0.101322
GO:0016757	F	transferase activity, transferring glycosyl groups	64	544	1.7e-08	1.7e-06	0.117647
GO:0000166	F	nucleotide binding	182	2267	3.6e-08	3.3e-06	0.0802823
GO:0032555	F	purine ribonucleotide binding	139	1631	7.4e-08	6e-06	0.0852238
GO:0032553	F	ribonucleotide binding	139	1631	7.4e-08	6e-06	0.0852238
GO:0017076	F	purine nucleotide binding	144	1713	9.1e-08	6.9e-06	0.084063
GO:0005516	F	calmodulin binding	34	231	4.6e-07	3.3e-05	0.147186
GO:0022804	F	active transmembrane transporter activity	68	664	7.1e-07	4.8e-05	0.10241
GO:0015075	F	ion transmembrane transporter activity	67	655	8.8e-07	5.7e-05	0.10229
GO:0046527	F	glucosyltransferase activity	24	136	1.4e-06	8.6e-05	0.176471
GO:0016798	F	hydrolase activity, acting on glycosyl bonds	56	526	2.3e-06	0.00013	0.106464
GO:0060089	F	molecular transducer activity	48	422	2.3e-06	0.00013	0.113744
GO:0004871	F	signal transducer activity	48	422	2.3e-06	0.00013	0.113744
GO:0008194	F	UDP-glycosyltransferase activity	31	219	3e-06	0.00016	0.141553
GO:0005488	F	binding	685	11258	3.7e-06	0.00019	0.0608456
GO:0016759	F	cellulose synthase activity	12	39	5.8e-06	0.00028	0.307692
GO:0005524	F	ATP binding	113	1377	6.2e-06	0.00029	0.0820625
GO:0032559	F	adenyl ribonucleotide binding	113	1384	7.7e-06	0.00034	0.0816474
GO:0001882	F	nucleoside binding	118	1465	8.6e-06	0.00035	0.0805461
GO:0001883	F	purine nucleoside binding	118	1465	8.6e-06	0.00035	0.0805461
GO:0030554	F	adenyl nucleotide binding	118	1465	8.6e-06	0.00035	0.0805461
GO:0016762	F	xyloglucan:xyloglucosyl transferase activity	9	22	1.4e-05	0.00054	0.409091
GO:0016787	F	hydrolase activity	239	3468	1.8e-05	0.00068	0.0689158
GO:0047262	F	polygalacturonate 4-alpha-galacturonosyltransferase activity	10	30	2e-05	0.00073	0.333333
GO:0015035	F	protein disulfide oxidoreductase activity	12	46	2.4e-05	0.00085	0.26087
GO:0005515	F	protein binding	204	2944	5.7e-05	0.002	0.0692935
GO:0008794	F	arsenate reductase (glutaredoxin) activity	7	15	6.6e-05	0.0021	0.466667
GO:0030613	F	oxidoreductase activity, acting on phosphorus or arsenic in donors	7	15	6.6e-05	0.0021	0.466667
GO:0030614	F	oxidoreductase activity, acting on phosphorus or arsenic in donors, with disulfide as acceptor	7	15	6.6e-05	0.0021	0.466667
GO:0004872	F	receptor activity	27	212	6.6e-05	0.0021	0.127358
GO:0004713	F	protein tyrosine kinase activity	26	203	8.2e-05	0.0026	0.128079
GO:0030611	F	arsenate reductase activity	7	16	9.1e-05	0.0027	0.4375
GO:0015112	F	nitrate transmembrane transporter activity	7	16	9.1e-05	0.0027	0.4375
GO:0042285	F	xylosyltransferase activity	6	11	0.00012	0.0034	0.545455
GO:0008509	F	anion transmembrane transporter activity	18	120	0.00018	0.005	0.15
GO:0015036	F	disulfide oxidoreductase activity	12	60	0.00021	0.0059	0.2
GO:0005200	F	structural constituent of cytoskeleton	9	35	0.00027	0.0073	0.257143
GO:0015198	F	oligopeptide transporter activity	7	21	0.00035	0.0091	0.333333
GO:0015197	F	peptide transporter activity	7	21	0.00035	0.0091	0.333333
GO:0015171	F	amino acid transmembrane transporter activity	12	64	0.00036	0.0091	0.1875
GO:0015291	F	secondary active transmembrane transporter activity	35	345	0.00038	0.0096	0.101449
GO:0005199	F	structural constituent of cell wall	9	39	0.00053	0.013	0.230769
GO:0005342	F	organic acid transmembrane transporter activity	13	78	0.00056	0.013	0.166667
GO:0046943	F	carboxylic acid transmembrane transporter activity	13	78	0.00056	0.013	0.166667
GO:0008324	F	cation transmembrane transporter activity	45	503	0.00077	0.018	0.0894632
GO:0005275	F	amine transmembrane transporter activity	13	81	0.00077	0.018	0.160494
GO:0015294	F	solute:cation symporter activity	20	163	0.00084	0.019	0.122699
GO:0009055	F	electron carrier activity	30	294	0.00088	0.019	0.102041
GO:0015293	F	symporter activity	20	164	0.0009	0.019	0.121951
GO:0042562	F	hormone binding	6	18	0.00093	0.02	0.333333
GO:0019001	F	guanyl nucleotide binding	26	249	0.0014	0.028	0.104418
GO:0032561	F	guanyl ribonucleotide binding	26	249	0.0014	0.028	0.104418
GO:0017111	F	nucleoside-triphosphatase activity	63	792	0.0014	0.028	0.0795455
GO:0005525	F	GTP binding	26	249	0.0014	0.028	0.104418
GO:0004553	F	hydrolase activity, hydrolyzing O-glycosyl compounds	42	476	0.0014	0.028	0.0882353
GO:0004888	F	transmembrane receptor activity	20	171	0.0014	0.028	0.116959
GO:0016462	F	pyrophosphatase activity	65	832	0.0017	0.033	0.078125
GO:0016887	F	ATPase activity	42	482	0.0018	0.034	0.0871369
GO:0016818	F	hydrolase activity, acting on acid anhydrides, in phosphorus-containing anhydrides	65	837	0.002	0.036	0.0776583
GO:0016817	F	hydrolase activity, acting on acid anhydrides	65	839	0.0021	0.038	0.0774732
GO:0008168	F	methyltransferase activity	27	273	0.0023	0.042	0.0989011
GO:0016741	F	transferase activity, transferring one-carbon groups	27	275	0.0025	0.045	0.0981818
GO:0015144	F	carbohydrate transmembrane transporter activity	18	156	0.0027	0.048	0.115385
GO:0005886	C	plasma membrane	239	1456	2.5e-49	1.2e-46	0.164148
GO:0016020	C	membrane	433	4068	1.8e-43	4.4e-41	0.106441
GO:0044464	C	cell part	1064	15217	2.9e-32	3.6e-30	0.0699218
GO:0005623	C	cell	1064	15217	2.9e-32	3.6e-30	0.0699218
GO:0031224	C	intrinsic to membrane	99	806	2.2e-13	2.1e-11	0.122829
GO:0005618	C	cell wall	64	403	2.6e-13	2.1e-11	0.158809
GO:0030312	C	external encapsulating structure	64	407	3.8e-13	2.7e-11	0.157248
GO:0009505	C	plant-type cell wall	47	254	3.8e-12	2.3e-10	0.185039
GO:0005773	C	vacuole	51	383	1.4e-08	7.8e-07	0.133159
GO:0005794	C	Golgi apparatus	43	293	1.6e-08	8e-07	0.146758
GO:0005730	C	nucleolus	35	209	1.9e-08	8.7e-07	0.167464
GO:0031225	C	anchored to membrane	40	272	4.8e-08	2e-06	0.147059
GO:0044425	C	membrane part	117	1360	5.3e-07	2e-05	0.0860294
GO:0031981	C	nuclear lumen	44	374	2.8e-06	9.8e-05	0.117647
GO:0016021	C	integral to membrane	43	395	2e-05	0.00066	0.108861
GO:0031226	C	intrinsic to plasma membrane	15	74	3.2e-05	0.00098	0.202703
GO:0044459	C	plasma membrane part	28	222	5.7e-05	0.0017	0.126126
GO:0046658	C	anchored to plasma membrane	10	36	7.2e-05	0.002	0.277778
GO:0044428	C	nuclear part	50	543	0.00022	0.0058	0.092081
GO:0045298	C	tubulin complex	6	13	0.00023	0.0058	0.461538
GO:0070013	C	intracellular organelle lumen	49	539	0.00033	0.0075	0.0909091
GO:0043233	C	organelle lumen	49	539	0.00033	0.0075	0.0909091
GO:0031974	C	membrane-enclosed lumen	49	546	0.00044	0.0094	0.0897436
GO:0044448	C	cell cortex part	10	52	0.00092	0.019	0.192308
GO:0000145	C	exocyst	8	34	0.00096	0.019	0.235294
GO:0005938	C	cell cortex	10	54	0.0012	0.022	0.185185

## Sheet: KEGG-LC_up_regulated_genes
Category	Trem	Count	%	P-Valve	Benjamini
KEGG_PATHWAY	Metabolic pathways	467	15.8	2.5e-10	1.6e-08	9.60206
KEGG_PATHWAY	Biosynthesis of secondary metabolites	284	9.6	1.3e-11	1.7e-09	10.8861
KEGG_PATHWAY	Carbon metabolism	68	2.3	0.00011	0.0018	3.95861
KEGG_PATHWAY	Biosynthesis of amino acids	62	2.1	0.00013	0.0019	3.88606
KEGG_PATHWAY	Biosynthesis of cofactors	57	1.9	0.001	0.0093	3
KEGG_PATHWAY	Starch and sucrose metabolism	48	1.6	7.2e-05	0.0013	4.14267
KEGG_PATHWAY	Glycolysis / Gluconeogenesis	43	1.5	1.5e-07	6.5e-06	6.82391
KEGG_PATHWAY	Amino sugar and nucleotide sugar metabolism	37	1.3	0.00068	0.0073	3.16749
KEGG_PATHWAY	Endocytosis	36	1.2	0.024	0.14	1.61979
KEGG_PATHWAY	Biosynthesis of nucleotide sugars	34	1.1	1.7e-05	0.00044	4.76955
KEGG_PATHWAY	mRNA surveillance pathway	27	0.9	0.055	0.24	1.25964
KEGG_PATHWAY	Proteasome	24	0.8	3e-05	0.00065	4.52288
KEGG_PATHWAY	Carbon fixation in photosynthetic organisms	24	0.8	0.00027	0.0032	3.56864
KEGG_PATHWAY	Phagosome	23	0.8	0.0093	0.067	2.03152
KEGG_PATHWAY	Pyruvate metabolism	24	0.8	0.03	0.16	1.52288
KEGG_PATHWAY	Phenylalanine, tyrosine and tryptophan biosynthesis	21	0.7	0.00024	0.0031	3.61979
KEGG_PATHWAY	Inositol phosphate metabolism	22	0.7	0.011	0.072	1.95861
KEGG_PATHWAY	Phosphatidylinositol signaling system	20	0.7	0.031	0.16	1.50864
KEGG_PATHWAY	Glyoxylate and dicarboxylate metabolism	20	0.7	0.035	0.17	1.45593
KEGG_PATHWAY	Purine metabolism	21	0.7	0.054	0.24	1.26761
KEGG_PATHWAY	Peroxisome	21	0.7	0.06	0.25	1.22185
KEGG_PATHWAY	Carotenoid biosynthesis	17	0.6	1.4e-06	4.4e-05	5.85387
KEGG_PATHWAY	Pentose phosphate pathway	19	0.6	0.003	0.024	2.52288
KEGG_PATHWAY	Arginine and proline metabolism	17	0.6	0.0083	0.063	2.08092
KEGG_PATHWAY	Glycine, serine and threonine metabolism	18	0.6	0.046	0.22	1.33724
KEGG_PATHWAY	Circadian rhythm - plant	15	0.5	0.0019	0.016	2.72125
KEGG_PATHWAY	Porphyrin metabolism	16	0.5	0.016	0.1	1.79588
KEGG_PATHWAY	Fructose and mannose metabolism	16	0.5	0.068	0.27	1.16749
KEGG_PATHWAY	Citrate cycle (TCA cycle)	16	0.5	0.076	0.3	1.11919
KEGG_PATHWAY	Fatty acid elongation	12	0.4	0.021	0.13	1.67778
KEGG_PATHWAY	Selenocompound metabolism	10	0.3	0.00081	0.008	3.09151
KEGG_PATHWAY	Nicotinate and nicotinamide metabolism	8	0.3	0.022	0.13	1.65758
KEGG_PATHWAY	Photosynthesis - antenna proteins	8	0.3	0.049	0.23	1.3098
KEGG_PATHWAY	Riboflavin metabolism	7	0.2	0.086	0.33	1.0655

## Sheet: KEGG-LC_down_regulated_genes
Category	Trem	Count	%	P-Valve	Benjamini
KEGG_PATHWAY	Metabolic pathways	346	12.2	1.5e-06	0.00018
KEGG_PATHWAY	Biosynthesis of secondary metabolites	203	7.1	2.8e-06	0.00018
KEGG_PATHWAY	Plant hormone signal transduction	59	2.1	5.2e-05	0.0022
KEGG_PATHWAY	alpha-Linolenic acid metabolism	14	0.5	0.0012	0.037
KEGG_PATHWAY	Steroid biosynthesis	12	0.4	0.0025	0.064
KEGG_PATHWAY	Sulfur metabolism	13	0.5	0.0031	0.065
KEGG_PATHWAY	Glycosaminoglycan degradation	6	0.2	0.0038	0.069
KEGG_PATHWAY	2-Oxocarboxylic acid metabolism	18	0.6	0.0059	0.094
KEGG_PATHWAY	Arachidonic acid metabolism	8	0.3	0.0068	0.096
KEGG_PATHWAY	Glucosinolate biosynthesis	9	0.3	0.0092	0.11
KEGG_PATHWAY	Biosynthesis of amino acids	43	1.5	0.0099	0.11
KEGG_PATHWAY	Carbon metabolism	47	1.7	0.01	0.11
KEGG_PATHWAY	Brassinosteroid biosynthesis	5	0.2	0.016	0.16
KEGG_PATHWAY	Glycine, serine and threonine metabolism	16	0.6	0.018	0.16
KEGG_PATHWAY	beta-Alanine metabolism	12	0.4	0.021	0.18
KEGG_PATHWAY	Sphingolipid metabolism	9	0.3	0.032	0.26
KEGG_PATHWAY	Cysteine and methionine metabolism	23	0.8	0.039	0.27
KEGG_PATHWAY	Tryptophan metabolism	14	0.5	0.039	0.27
KEGG_PATHWAY	Valine, leucine and isoleucine degradation	12	0.4	0.043	0.27
KEGG_PATHWAY	MAPK signaling pathway - plant	25	0.9	0.043	0.27
KEGG_PATHWAY	Propanoate metabolism	10	0.4	0.052	0.31
KEGG_PATHWAY	Peroxisome	17	0.6	0.059	0.34
KEGG_PATHWAY	Glutathione metabolism	19	0.7	0.066	0.36
KEGG_PATHWAY	Other glycan degradation	6	0.2	0.07	0.37
KEGG_PATHWAY	Galactose metabolism	12	0.4	0.076	0.38
KEGG_PATHWAY	Linoleic acid metabolism	4	0.1	0.084	0.41
KEGG_PATHWAY	Vitamin B6 metabolism	5	0.2	0.097	0.46

## Sheet: KEGG-NH4+_up_regulated_genes
Category	Trem	Count	%	P-Valve	Benjamini
KEGG_PATHWAY	Metabolic pathways	401	21.1	9e-40	1.1e-37
KEGG_PATHWAY	Biosynthesis of secondary metabolites	257	13.5	3.2e-32	2e-30
KEGG_PATHWAY	Carbon metabolism	70	3.7	1.4e-12	5.8e-11
KEGG_PATHWAY	Biosynthesis of amino acids	64	3.4	5.4e-12	1.6e-10
KEGG_PATHWAY	Glucosinolate biosynthesis	16	0.8	5.6e-09	1.4e-07
KEGG_PATHWAY	2-Oxocarboxylic acid metabolism	27	1.4	1.4e-08	3e-07
KEGG_PATHWAY	Carbon fixation in photosynthetic organisms	25	1.3	6.5e-08	1.2e-06
KEGG_PATHWAY	Cysteine and methionine metabolism	34	1.8	3.7e-07	5.7e-06
KEGG_PATHWAY	Glyoxylate and dicarboxylate metabolism	23	1.2	1.2e-05	0.00016
KEGG_PATHWAY	Glycolysis / Gluconeogenesis	30	1.6	1.3e-05	0.00016
KEGG_PATHWAY	Glutathione metabolism	27	1.4	1.8e-05	0.0002
KEGG_PATHWAY	Glycine, serine and threonine metabolism	20	1.1	8.6e-05	0.00088
KEGG_PATHWAY	Starch and sucrose metabolism	35	1.8	0.00021	0.0019
KEGG_PATHWAY	Arginine biosynthesis	13	0.7	0.00022	0.0019
KEGG_PATHWAY	Valine, leucine and isoleucine degradation	16	0.8	0.00023	0.0019
KEGG_PATHWAY	Nitrogen metabolism	14	0.7	0.00036	0.0028
KEGG_PATHWAY	Pyruvate metabolism	23	1.2	0.00042	0.0031
KEGG_PATHWAY	Porphyrin metabolism	15	0.8	0.00098	0.0067
KEGG_PATHWAY	alpha-Linolenic acid metabolism	13	0.7	0.0013	0.0086
KEGG_PATHWAY	Biosynthesis of cofactors	41	2.2	0.0018	0.011
KEGG_PATHWAY	Ascorbate and aldarate metabolism	16	0.8	0.002	0.012
KEGG_PATHWAY	Fatty acid metabolism	17	0.9	0.0023	0.013
KEGG_PATHWAY	Carotenoid biosynthesis	10	0.5	0.0024	0.013
KEGG_PATHWAY	Fatty acid degradation	13	0.7	0.003	0.016
KEGG_PATHWAY	Arginine and proline metabolism	14	0.7	0.0036	0.017
KEGG_PATHWAY	Sulfur metabolism	12	0.6	0.0036	0.017
KEGG_PATHWAY	Valine, leucine and isoleucine biosynthesis	8	0.4	0.0046	0.021
KEGG_PATHWAY	Alanine, aspartate and glutamate metabolism	13	0.7	0.0062	0.027
KEGG_PATHWAY	Tryptophan metabolism	15	0.8	0.0065	0.027
KEGG_PATHWAY	Tyrosine metabolism	11	0.6	0.0093	0.038
KEGG_PATHWAY	Pentose phosphate pathway	13	0.7	0.017	0.069
KEGG_PATHWAY	Propanoate metabolism	10	0.5	0.026	0.1
KEGG_PATHWAY	Citrate cycle (TCA cycle)	13	0.7	0.036	0.13
KEGG_PATHWAY	Selenocompound metabolism	6	0.3	0.036	0.13
KEGG_PATHWAY	Biosynthesis of various plant secondary metabolites	13	0.7	0.04	0.14
KEGG_PATHWAY	Peroxisome	16	0.8	0.044	0.15
KEGG_PATHWAY	Histidine metabolism	6	0.3	0.045	0.15
KEGG_PATHWAY	Homologous recombination	12	0.6	0.05	0.16
KEGG_PATHWAY	Ubiquinone and other terpenoid-quinone biosynthesis	9	0.5	0.05	0.16
KEGG_PATHWAY	Thiamine metabolism	6	0.3	0.065	0.2
KEGG_PATHWAY	Lysine biosynthesis	5	0.3	0.067	0.2
KEGG_PATHWAY	Purine metabolism	15	0.8	0.075	0.22
KEGG_PATHWAY	Isoquinoline alkaloid biosynthesis	6	0.3	0.077	0.22
KEGG_PATHWAY	Fatty acid biosynthesis	9	0.5	0.081	0.23
KEGG_PATHWAY	Folate biosynthesis	7	0.4	0.093	0.25

## Sheet: KEGG-NH4+_down_regulated_genes
Category	Trem	Count	%	P-Valve	Benjamini
KEGG_PATHWAY	Plant-pathogen interaction	45	2.2	5.5e-10	6.3e-08
KEGG_PATHWAY	Ribosome biogenesis in eukaryotes	28	1.4	5.8e-09	3.3e-07
KEGG_PATHWAY	Plant hormone signal transduction	52	2.6	4.3e-08	1.6e-06
KEGG_PATHWAY	MAPK signaling pathway - plant	26	1.3	9.2e-05	0.0026
KEGG_PATHWAY	Phagosome	17	0.8	0.00077	0.018
KEGG_PATHWAY	Nitrogen metabolism	9	0.4	0.019	0.37
KEGG_PATHWAY	Steroid biosynthesis	8	0.4	0.022	0.37
KEGG_PATHWAY	Fatty acid elongation	7	0.3	0.065	0.92
KEGG_PATHWAY	Fatty acid degradation	8	0.4	0.079	0.92
KEGG_PATHWAY	Glycerolipid metabolism	10	0.5	0.08	0.92
