# Supplementary material for: Rewiring of primary metabolism for ammonium recycling under short-term low CO2 treatment – its implication for C4 evolution
Source: Front Plant Sci. 2024 Aug 1;15:1322261. doi: 10.3389/fpls.2024.1322261 (PMC11324553; doi:10.3389/fpls.2024.1322261)
Supplement: Supplementary file 4 [file DataSheet_3.xlsx]

## Sheet: CO-upregualted genes
LC/NC	GeneID	baseMean	log2FoldChange	lfcSE	stat	pvalue	padj		NH4+/GM	baseMean	log2FoldChange	lfcSE	stat	pvalue	padj
AT1G01250	AT1G01250	196.735	1.36464	0.242889	-5.61839	1.9275e-08	4.11527e-07		AT1G01250	32.9193	0.912827	0.32844	2.77928	0.00544791	0.0322052
AT1G01470	AT1G01470	2620.18	1.73468	0.204906	-8.46571	2.54602e-17	2.80747e-15		AT1G01470	880.058	0.441344	0.114132	3.86694	0.000110208	0.00129091
AT1G02205	AT1G02205	1733.01	3.1358	0.325721	-9.62726	6.13408e-22	1.48319e-19		AT1G02205	985.251	0.635549	0.144351	4.4028	1.06862e-05	0.00016705
AT1G02820	AT1G02820	2264.69	1.84731	0.200781	-9.20063	3.55868e-20	6.26484e-18		AT1G02820	146.154	0.75571	0.276797	2.73019	0.00632971	0.0364764
AT1G03250	AT1G03250	609.857	0.584849	0.121611	-4.80917	1.51559e-06	2.00636e-05		AT1G03250	469.06	0.233896	0.0779699	2.99982	0.00270136	0.0184258
AT1G04690	AT1G04690	1499.42	0.425826	0.0851014	-5.00375	5.62245e-07	8.36449e-06		AT1G04690	1326.71	0.240241	0.0643665	3.7324	0.000189667	0.00205955
AT1G05140	AT1G05140	1762.61	0.417385	0.0872669	-4.78286	1.72822e-06	2.25072e-05		AT1G05140	933.055	0.241634	0.0864384	2.79545	0.00518274	0.0309894
AT1G05680	AT1G05680	50.4232	2.48437	0.345142	-7.19812	6.10497e-13	3.19064e-11		AT1G05680	87.6772	1.9909	0.598464	3.32668	0.000878867	0.00739073
AT1G06550	AT1G06550	710.931	0.379071	0.0925698	-4.09498	4.2221e-05	0.000368405		AT1G06550	781.824	0.364654	0.0855274	4.26359	2.01168e-05	0.000293348
AT1G06690	AT1G06690	3100.87	1.06164	0.123009	-8.63063	6.10158e-18	7.65329e-16		AT1G06690	1215.84	0.521337	0.0820443	6.35434	2.09323e-10	8.90179e-09
AT1G07110	AT1G07110	4009.09	0.546157	0.114618	-4.76502	1.88832e-06	2.42616e-05		AT1G07110	2826.05	0.308548	0.0820006	3.76275	0.000168052	0.00185973
AT1G07180	AT1G07180	4699.55	0.902577	0.098085	-9.20199	3.5138e-20	6.24057e-18		AT1G07180	1630.93	0.476454	0.101004	4.71716	2.39155e-06	4.47755e-05
AT1G07430	AT1G07430	88.6621	2.44836	0.322571	-7.59016	3.19506e-14	2.06844e-12		AT1G07430	21.2641	2.01509	0.440368	4.57592	4.74142e-06	8.15196e-05
AT1G09310	AT1G09310	31202.6	0.693434	0.144183	-4.8094	1.51382e-06	2.00534e-05		AT1G09310	13601	0.434874	0.105691	4.11457	3.87894e-05	0.000522153
AT1G09490	AT1G09490	1121.49	0.421083	0.120844	-3.48452	0.000493015	0.0030416		AT1G09490	549.539	0.322825	0.102967	3.13523	0.00171718	0.0127295
AT1G09500	AT1G09500	164.077	0.919086	0.313601	-2.93075	0.00338142	0.015219		AT1G09500	85.0791	2.19373	0.208471	10.5229	6.77195e-26	1.51735e-23
AT1G10090	AT1G10090	845.934	0.458038	0.109239	-4.193	2.75295e-05	0.000254252		AT1G10090	492.673	0.215405	0.0815365	2.64183	0.00824596	0.0450877
AT1G10370	AT1G10370	2741.94	1.10386	0.109467	-10.084	6.50193e-24	2.21165e-21		AT1G10370	729.725	0.534295	0.129201	4.13539	3.54349e-05	0.000483241
AT1G10900	AT1G10900	2913.01	0.95203	0.115027	-8.27659	1.26751e-16	1.23483e-14		AT1G10900	984.284	0.356899	0.0733879	4.86319	1.1551e-06	2.3369e-05
AT1G10930	AT1G10930	468.214	0.690257	0.121735	-5.67018	1.42652e-08	3.16733e-07		AT1G10930	538.759	0.383678	0.0913462	4.20026	2.66606e-05	0.000374867
AT1G11210	AT1G11210	53.0684	1.86259	0.324653	-5.73716	9.6279e-09	2.2184e-07		AT1G11210	34.907	1.01325	0.284106	3.56644	0.000361861	0.00356692
AT1G12050	AT1G12050	1102.37	0.333687	0.10305	-3.23812	0.00120319	0.00647018		AT1G12050	854.621	0.225347	0.0779045	2.8926	0.00382063	0.02428
AT1G12800	AT1G12800	8821.83	0.385738	0.0745307	-5.17556	2.27233e-07	3.77825e-06		AT1G12800	6504.15	0.343754	0.0633247	5.42844	5.68501e-08	1.5365e-06
AT1G12900	AT1G12900	58575	0.480742	0.092464	-5.19924	2.0011e-07	3.36913e-06		AT1G12900	35933.2	0.274077	0.0921529	2.97415	0.00293797	0.0196601
AT1G13440	AT1G13440	25942	0.45954	0.0980176	-4.68834	2.75432e-06	3.37669e-05		AT1G13440	18039	0.4936	0.0799896	6.1708	6.79443e-10	2.70712e-08
AT1G13930	AT1G13930	24318.6	1.51971	0.124909	-12.1665	4.68637e-34	6.27005e-31		AT1G13930	10678.6	0.329939	0.117566	2.80642	0.00500959	0.0301792
AT1G15060	AT1G15060	950.218	0.464051	0.143314	-3.23799	0.00120373	0.00647141		AT1G15060	553.795	0.461993	0.08824	5.23564	1.64418e-07	4.01659e-06
AT1G15710	AT1G15710	448.402	0.409397	0.142639	-2.87016	0.0041026	0.0178214		AT1G15710	258.679	0.42899	0.117374	3.6549	0.000257286	0.00267594
AT1G16020	AT1G16020	559.942	0.356038	0.100326	-3.5488	0.000386985	0.00248128		AT1G16020	324.607	0.331867	0.10425	3.18338	0.00145566	0.0111807
AT1G17050	AT1G17050	2418.79	0.95993	0.131217	-7.3156	2.5624e-13	1.41277e-11		AT1G17050	867.388	0.556107	0.112719	4.93358	8.07355e-07	1.67566e-05
AT1G17220	AT1G17220	15172	0.664715	0.0878515	-7.56636	3.83839e-14	2.44548e-12		AT1G17220	8989.43	0.267329	0.0571756	4.67558	2.93121e-06	5.33455e-05
AT1G17290	AT1G17290	3267.97	0.503628	0.121124	-4.15796	3.21101e-05	0.000289756		AT1G17290	2029.18	0.19509	0.0622221	3.13538	0.00171633	0.0127295
AT1G18060	AT1G18060	4103.43	0.27207	0.0953301	-2.85398	0.00431755	0.0186143		AT1G18060	2149.04	0.376321	0.0942384	3.99329	6.51629e-05	0.000821952
AT1G18265	AT1G18265	201.992	1.05921	0.254088	-4.1687	3.06346e-05	0.000278571		AT1G18265	56.9943	1.08682	0.253068	4.29457	1.75034e-05	0.000259604
AT1G18660	AT1G18660	1379.14	0.47117	0.103823	-4.53822	5.67308e-06	6.3819e-05		AT1G18660	935.68	0.267495	0.0837008	3.19585	0.00139422	0.0108123
AT1G18870	AT1G18870	297.205	1.60588	0.143929	-11.1575	6.58497e-29	3.88688e-26		AT1G18870	155.975	0.838268	0.184586	4.54134	5.58984e-06	9.41642e-05
AT1G19140	AT1G19140	566.021	0.489916	0.122771	-3.99049	6.59372e-05	0.000541889		AT1G19140	395.119	0.52458	0.112966	4.64371	3.42206e-06	6.13673e-05
AT1G19650	AT1G19650	896.845	0.548489	0.14229	-3.85474	0.000115855	0.000882051		AT1G19650	460.461	0.572804	0.127011	4.50988	6.48634e-06	0.000107272
AT1G19920	AT1G19920	2524.27	0.399754	0.094801	-4.21677	2.47827e-05	0.000232848		AT1G19920	1588.17	0.375917	0.0749481	5.0157	5.28413e-07	1.16151e-05
AT1G19970	AT1G19970	123.732	0.674988	0.217476	-3.10374	0.00191093	0.00949291		AT1G19970	103.873	0.484834	0.165601	2.92773	0.00341449	0.0222208
AT1G20030	AT1G20030	117.514	1.86102	0.230743	-8.06534	7.30332e-16	6.37262e-14		AT1G20030	177.328	0.846323	0.172624	4.9027	9.45287e-07	1.93117e-05
AT1G20160	AT1G20160	1065.65	0.816791	0.208794	-3.91195	9.15536e-05	0.00072111		AT1G20160	255.649	0.651827	0.144762	4.50274	6.70822e-06	0.000110728
AT1G20490	AT1G20490	195.505	0.447436	0.169349	-2.64209	0.00823954	0.0316175		AT1G20490	110.967	0.81031	0.160984	5.03347	4.81669e-07	1.0655e-05
AT1G20650	AT1G20650	1089.25	0.296719	0.0983894	-3.01576	0.00256333	0.0121303		AT1G20650	711.314	0.416746	0.127506	3.26843	0.00108145	0.00873801
AT1G20693	AT1G20693	2346.67	0.497628	0.181178	-2.74663	0.00602109	0.0244659		AT1G20693	2387.61	0.581383	0.0830409	7.00116	2.53855e-12	1.39573e-10
AT1G20696	AT1G20696	1498.97	0.44009	0.124999	-3.52075	0.000430327	0.00271665		AT1G20696	1668.7	0.287147	0.0726569	3.95209	7.74714e-05	0.000949617
AT1G21400	AT1G21400	904.527	0.899846	0.264325	-3.40432	0.000663287	0.00392786		AT1G21400	488.016	0.864724	0.130632	6.61952	3.6036e-11	1.69126e-09
AT1G21410	AT1G21410	414.875	0.510554	0.172968	-2.95173	0.00316001	0.0144362		AT1G21410	262.029	0.848117	0.132526	6.39964	1.55744e-10	6.74716e-09
AT1G22850	AT1G22850	5378.79	0.601384	0.123414	-4.87292	1.09962e-06	1.50636e-05		AT1G22850	1849.2	0.201332	0.0755761	2.66397	0.0077225	0.0428552
AT1G23190	AT1G23190	2408.27	0.787793	0.101935	-7.7284	1.0891e-14	7.80614e-13		AT1G23190	1432.3	0.365406	0.0800062	4.56722	4.94232e-06	8.44165e-05
AT1G23740	AT1G23740	11306.9	0.396654	0.114606	-3.46101	0.000538145	0.00327969		AT1G23740	4555.81	0.560781	0.106513	5.26492	1.40248e-07	3.49581e-06
AT1G26160	AT1G26160	453.846	0.450798	0.0920371	-4.898	9.68146e-07	1.34742e-05		AT1G26160	452.889	0.324177	0.0845541	3.83395	0.000126101	0.00144458
AT1G27480	AT1G27480	1325.49	0.302924	0.091008	-3.32854	0.000873035	0.00492023		AT1G27480	672.111	0.307807	0.0805243	3.82254	0.000132084	0.00150075
AT1G27760	AT1G27760	1185.47	0.802811	0.118428	-6.77891	1.21087e-11	4.97704e-10		AT1G27760	768.378	0.274904	0.0816255	3.36787	0.000757509	0.00658256
AT1G28150	AT1G28150	506.832	0.289587	0.112639	-2.57092	0.0101428	0.0374206		AT1G28150	633.819	0.36364	0.0890684	4.0827	4.45151e-05	0.000587093
AT1G28610	AT1G28610	968.612	0.533361	0.130284	-4.09383	4.24298e-05	0.000370067		AT1G28610	323.652	0.442591	0.140921	3.1407	0.00168544	0.0125558
AT1G29670	AT1G29670	3526.4	0.745817	0.106714	-6.98897	2.7692e-12	1.28349e-10		AT1G29670	1623.05	0.224525	0.0773849	2.9014	0.00371501	0.023744
AT1G30260	AT1G30260	321.244	0.504081	0.148676	-3.39047	0.000697729	0.00407886		AT1G30260	61.4538	0.915792	0.236262	3.87617	0.000106113	0.00124926
AT1G30610	AT1G30610	798.912	0.299868	0.108915	-2.75324	0.00590082	0.0240259		AT1G30610	852.791	0.295563	0.0934373	3.16322	0.00156034	0.0118363
AT1G31190	AT1G31190	1285.65	0.409457	0.100143	-4.08871	4.33778e-05	0.000377678		AT1G31190	881.268	0.259476	0.0929952	2.79021	0.00526743	0.031316
AT1G33110	AT1G33110	1208.58	0.313044	0.112885	-2.77313	0.00555198	0.0228348		AT1G33110	740.316	0.846769	0.151239	5.59886	2.1576e-08	6.33242e-07
AT1G34570	AT1G34570	610.844	0.3203	0.128134	-2.49974	0.0124285	0.0438748		AT1G34570	305.873	0.465429	0.118228	3.93671	8.26061e-05	0.0010037
AT1G35720	AT1G35720	3699.13	0.935312	0.17122	-5.46265	4.69086e-08	9.18448e-07		AT1G35720	2699.27	0.343006	0.124452	2.75613	0.00584892	0.0342167
AT1G44000	AT1G44000	3837.6	0.366004	0.0689908	-5.30511	1.12606e-07	2.03228e-06		AT1G44000	2637.3	0.222196	0.0786471	2.82523	0.00472466	0.0288818
AT1G44575	AT1G44575	52563.2	0.662715	0.0969265	-6.8373	8.07023e-12	3.41691e-10		AT1G44575	30640.4	0.275228	0.0880133	3.12712	0.00176528	0.0130113
AT1G46554	AT1G46554	105.716	0.72948	0.212993	-3.42491	0.00061501	0.00367778		AT1G46554	66.2442	0.593503	0.195184	3.04073	0.00236003	0.0165028
AT1G47510	AT1G47510	200.503	0.907234	0.288377	-3.146	0.0016552	0.00844175		AT1G47510	11.1056	1.45127	0.52109	2.78507	0.00535154	0.031726
AT1G48100	AT1G48100	150.25	1.24633	0.204893	-6.08287	1.18051e-09	3.27233e-08		AT1G48100	69.0977	1.58242	0.264125	5.99119	2.0831e-09	7.49699e-08
AT1G51140	AT1G51140	794.009	0.921481	0.15347	-6.00432	1.92133e-09	5.09367e-08		AT1G51140	322.951	1.06641	0.143223	7.44583	9.6337e-14	6.41364e-12
AT1G52890	AT1G52890	150.305	1.38955	0.316443	-4.39114	1.12756e-05	0.000116464		AT1G52890	10.7386	1.42203	0.535415	2.65594	0.00790874	0.0436447
AT1G53240	AT1G53240	7277.42	0.378802	0.116861	-3.24147	0.00118913	0.00640489		AT1G53240	4997.75	0.28599	0.0484818	5.89892	3.65886e-09	1.2665e-07
AT1G53670	AT1G53670	3208.13	0.644766	0.106149	-6.07417	1.24628e-09	3.44242e-08		AT1G53670	1532.73	0.703945	0.101474	6.93722	3.99898e-12	2.10964e-10
AT1G54100	AT1G54100	1499.25	0.736857	0.219717	-3.35367	0.000797478	0.00457143		AT1G54100	1249.5	0.513283	0.092983	5.52018	3.38647e-08	9.56195e-07
AT1G55110	AT1G55110	548.186	0.676514	0.178354	-3.79309	0.000148787	0.00109254		AT1G55110	298.47	0.867439	0.1129	7.68323	1.55121e-14	1.14624e-12
AT1G57590	AT1G57590	414.815	1.58294	0.36276	-4.36361	1.27932e-05	0.000130262		AT1G57590	68.7723	1.12253	0.259611	4.32392	1.53282e-05	0.00023062
AT1G57770	AT1G57770	2119.06	0.558326	0.096698	-5.77392	7.74497e-09	1.82007e-07		AT1G57770	1246.55	0.25532	0.0917514	2.78274	0.00539027	0.0319098
AT1G58270	AT1G58270	661.105	1.18542	0.349086	-3.39578	0.000684325	0.00402512		AT1G58270	1584.87	0.241233	0.070223	3.43524	0.000592033	0.00536616
AT1G58280	AT1G58280	505.259	0.589029	0.192363	-3.06206	0.00219816	0.0106506		AT1G58280	215.984	0.454961	0.131907	3.44909	0.000562474	0.00512723
AT1G58360	AT1G58360	1602	0.609611	0.151488	-4.02415	5.7182e-05	0.000478959		AT1G58360	910.911	0.405786	0.077322	5.248	1.53759e-07	3.78726e-06
AT1G58520	AT1G58520	2867.77	0.815935	0.157857	-5.16882	2.3558e-07	3.90731e-06		AT1G58520	459.908	0.674046	0.164747	4.0914	4.2878e-05	0.000570193
AT1G60190	AT1G60190	255.466	1.91733	0.353182	-5.42873	5.6756e-08	1.09103e-06		AT1G60190	24.0969	1.51697	0.527732	2.87451	0.00404653	0.0255134
AT1G62710	AT1G62710	280.878	0.681328	0.19212	-3.54637	0.000390575	0.0025011		AT1G62710	152.861	1.13936	0.171152	6.65697	2.79527e-11	1.33903e-09
AT1G62750	AT1G62750	21930.6	0.506855	0.0958422	-5.28843	1.23369e-07	2.193e-06		AT1G62750	11909.1	0.324817	0.0794672	4.08743	4.36172e-05	0.000577637
AT1G64110	AT1G64110	14.7455	2.54318	0.37361	-6.80705	9.96179e-12	4.13919e-10		AT1G64110	30.1304	1.47034	0.438809	3.35075	0.000805936	0.0068913
AT1G64660	AT1G64660	289.523	0.94023	0.199701	-4.70818	2.49932e-06	3.0886e-05		AT1G64660	283.616	1.0648	0.138302	7.69906	1.37067e-14	1.01644e-12
AT1G64860	AT1G64860	6718.27	0.564761	0.0929789	-6.07408	1.24702e-09	3.44242e-08		AT1G64860	3241.01	0.203857	0.0755118	2.69968	0.00694072	0.0392591
AT1G64900	AT1G64900	3501.23	0.501733	0.130952	-3.83141	0.000127408	0.000955516		AT1G64900	992.84	0.644481	0.116738	5.52077	3.37514e-08	9.54289e-07
AT1G64950	AT1G64950	1407.81	0.615514	0.111208	-5.5348	3.11588e-08	6.36789e-07		AT1G64950	679.774	0.647815	0.0962027	6.73385	1.65226e-11	8.13944e-10
AT1G64970	AT1G64970	1192.73	0.670121	0.130456	-5.13677	2.79505e-07	4.53101e-06		AT1G64970	445.816	0.402567	0.12674	3.17632	0.00149158	0.0114192
AT1G65580	AT1G65580	1144.87	0.269712	0.0956528	-2.81969	0.00480694	0.0203053		AT1G65580	1046.68	0.196009	0.071159	2.75453	0.00587772	0.0343281
AT1G65690	AT1G65690	29.9178	0.889568	0.337365	-2.63681	0.00836893	0.0319977		AT1G65690	37.3666	1.16373	0.298776	3.89499	9.82015e-05	0.00116866
AT1G67300	AT1G67300	485.809	0.540606	0.154355	-3.50234	0.000461183	0.0028708		AT1G67300	417.468	0.320681	0.0929501	3.45004	0.000560514	0.00511607
AT1G68660	AT1G68660	2733.02	0.437045	0.120256	-3.6343	0.000278738	0.00187529		AT1G68660	1351.6	0.319561	0.106718	2.99443	0.00274955	0.0186751
AT1G69260	AT1G69260	120.84	2.3473	0.32651	-7.18906	6.52411e-13	3.38327e-11		AT1G69260	78.1638	1.87718	0.253833	7.39534	1.41048e-13	9.12784e-12
AT1G69295	AT1G69295	749.009	0.298048	0.117839	-2.52928	0.0114298	0.0410863		AT1G69295	611.77	0.365068	0.088408	4.12936	3.63775e-05	0.000494155
AT1G69480	AT1G69480	82.589	2.87301	0.297902	-9.64414	5.20469e-22	1.32219e-19		AT1G69480	34.9212	1.0237	0.301226	3.39844	0.000677722	0.00598914
AT1G69830	AT1G69830	5357.06	0.349517	0.0750792	-4.65531	3.235e-06	3.91103e-05		AT1G69830	3936.35	0.191996	0.0672245	2.85605	0.00428952	0.026789
AT1G70480	AT1G70480	373.775	0.397419	0.125315	-3.17137	0.00151721	0.00785777		AT1G70480	451.664	0.302573	0.114984	2.63144	0.00850235	0.0461531
AT1G70610	AT1G70610	2385.99	1.21736	0.101847	-11.9528	6.27983e-33	7.00167e-30		AT1G70610	901.578	0.27459	0.101008	2.71851	0.00655772	0.0374736
AT1G70730	AT1G70730	4463.65	0.614236	0.110426	-5.56241	2.66081e-08	5.51082e-07		AT1G70730	1792.74	0.454988	0.0864237	5.26462	1.40478e-07	3.49735e-06
AT1G72770	AT1G72770	1098.05	0.519516	0.188596	-2.75465	0.00587546	0.0239275		AT1G72770	692.106	0.759282	0.100406	7.56213	3.96521e-14	2.78205e-12
AT1G73390	AT1G73390	1686.13	1.45696	0.176783	-8.2415	1.70072e-16	1.60243e-14		AT1G73390	473.881	0.565889	0.103418	5.47184	4.45382e-08	1.23088e-06
AT1G73480	AT1G73480	3467.98	1.04958	0.186878	-5.61641	1.94968e-08	4.15374e-07		AT1G73480	959.735	1.76404	0.182688	9.65603	4.63489e-22	7.72655e-20
AT1G73920	AT1G73920	2095.72	0.483896	0.127505	-3.79512	0.00014757	0.00108483		AT1G73920	1589.19	0.411612	0.0719368	5.72185	1.0537e-08	3.34202e-07
AT1G73990	AT1G73990	2290.98	0.786938	0.0880812	-8.93423	4.10013e-19	6.28134e-17		AT1G73990	1408.4	0.423012	0.0606483	6.97484	3.06215e-12	1.65738e-10
AT1G74470	AT1G74470	51585.5	0.232267	0.0745247	-3.11664	0.00182923	0.00916855		AT1G74470	36278.9	0.263009	0.0747878	3.51674	0.000436889	0.00416827
AT1G75210	AT1G75210	1605.55	0.399623	0.0941092	-4.24638	2.17256e-05	0.00020822		AT1G75210	1015.79	0.222137	0.0637469	3.48467	0.000492741	0.00459623
AT1G76050	AT1G76050	551.308	0.227434	0.0824058	-2.75993	0.00578138	0.0236272		AT1G76050	483	0.273636	0.0993392	2.75456	0.0058771	0.0343281
AT1G76570	AT1G76570	812.638	0.66575	0.144359	-4.61178	3.99244e-06	4.70765e-05		AT1G76570	264.191	0.509355	0.141773	3.59275	0.000327201	0.00328431
AT1G77090	AT1G77090	2226.64	0.456014	0.106371	-4.28701	1.81095e-05	0.000177201		AT1G77090	1192.65	0.327857	0.0751142	4.36478	1.27248e-05	0.000194827
AT1G77450	AT1G77450	115.143	0.83668	0.263427	-3.17614	0.00149249	0.00774577		AT1G77450	98.2727	0.884682	0.183252	4.82767	1.38141e-06	2.74412e-05
AT1G77590	AT1G77590	1316.5	0.276445	0.104504	-2.64531	0.0081615	0.0314262		AT1G77590	1401.69	0.432303	0.06593	6.55699	5.49039e-11	2.52558e-09
AT1G77600	AT1G77600	600.587	0.637862	0.096204	-6.63031	3.34977e-11	1.27565e-09		AT1G77600	441.394	0.30975	0.0962396	3.21854	0.00128847	0.0100974
AT1G77760	AT1G77760	2418.63	0.869336	0.18792	-4.6261	3.7262e-06	4.43394e-05		AT1G77760	5124.06	1.8166	0.278952	6.51221	7.40521e-11	3.34729e-09
AT1G77800	AT1G77800	1840.16	0.285627	0.100195	-2.85071	0.00436217	0.0187783		AT1G77800	1399.75	0.179735	0.0634305	2.83358	0.00460303	0.0282944
AT1G77930	AT1G77930	1582.46	0.364505	0.121543	-2.99897	0.00270893	0.0127052		AT1G77930	926.111	0.193772	0.0730151	2.65386	0.00795759	0.0438446
AT1G78070	AT1G78070	2251.76	1.09953	0.158669	-6.92969	4.21759e-12	1.88935e-10		AT1G78070	361.517	0.653704	0.159396	4.10113	4.11139e-05	0.000549539
AT1G78140	AT1G78140	1290.74	0.595172	0.109888	-5.41615	6.08944e-08	1.15838e-06		AT1G78140	799.665	0.35995	0.0845949	4.25499	2.09061e-05	0.000303583
AT1G78210	AT1G78210	389.412	0.975211	0.146251	-6.66804	2.59234e-11	1.0063e-09		AT1G78210	386.273	0.266692	0.0926542	2.87836	0.00399746	0.0252574
AT1G78610	AT1G78610	577.186	0.501968	0.107541	-4.66768	3.04624e-06	3.70067e-05		AT1G78610	500.843	0.264698	0.0870408	3.04109	0.00235727	0.016489
AT1G78820	AT1G78820	1306.84	0.579443	0.109428	-5.29522	1.18876e-07	2.12631e-06		AT1G78820	749.954	0.368238	0.113693	3.23888	0.00120001	0.00951512
AT1G79270	AT1G79270	1575.68	0.822295	0.179544	-4.57991	4.65181e-06	5.36535e-05		AT1G79270	543.314	0.407037	0.143782	2.83094	0.00464114	0.0284795
AT1G79410	AT1G79410	236.866	1.03478	0.178129	-5.80917	6.27839e-09	1.49467e-07		AT1G79410	121.539	0.713834	0.160972	4.43453	9.22738e-06	0.000147003
AT1G79520	AT1G79520	1223.91	1.10574	0.202986	-5.44735	5.11252e-08	9.92293e-07		AT1G79520	269.994	0.92146	0.161413	5.70871	1.13838e-08	3.55112e-07
AT1G79610	AT1G79610	284.686	0.367745	0.139998	-2.62679	0.00861955	0.0327873		AT1G79610	257.536	0.4221	0.107792	3.91589	9.00712e-05	0.00108054
AT1G80030	AT1G80030	2301.6	0.315389	0.0878047	-3.59194	0.00032823	0.00215622		AT1G80030	1679.07	0.35874	0.0737358	4.86521	1.14337e-06	2.31541e-05
AT1G80110	AT1G80110	52.3449	0.97176	0.25454	-3.81771	0.000134698	0.00100157		AT1G80110	39.3854	0.691451	0.249043	2.77643	0.00549595	0.0324616
AT2G01590	AT2G01590	1631.3	0.394987	0.0809984	-4.87648	1.07997e-06	1.48147e-05		AT2G01590	890.854	0.255931	0.09378	2.72905	0.00635166	0.0365725
AT2G04842	AT2G04842	3780.11	0.276054	0.0872077	-3.16547	0.0015483	0.00798994		AT2G04842	2350.35	0.221122	0.0609955	3.62522	0.000288712	0.00294333
AT2G05620	AT2G05620	4458.91	0.267856	0.105264	-2.54461	0.01094	0.0397157		AT2G05620	2362.78	0.292482	0.101993	2.86766	0.00413523	0.0260136
AT2G15620	AT2G15620	7838.67	0.460574	0.176587	-2.6082	0.00910203	0.0342782		AT2G15620	6207.53	0.580086	0.06529	8.88475	6.40651e-19	7.80695e-17
AT2G15970	AT2G15970	5362.5	1.06669	0.0999737	-10.6697	1.41078e-26	6.29175e-24		AT2G15970	2578.03	0.389656	0.100956	3.85967	0.000113538	0.00132026
AT2G16365	AT2G16365	882.16	0.760068	0.134015	-5.67151	1.41544e-08	3.15277e-07		AT2G16365	467.408	0.272796	0.0818607	3.33244	0.000860886	0.00728641
AT2G16990	AT2G16990	159.627	0.501703	0.147599	-3.3991	0.000676087	0.00398485		AT2G16990	117.063	1.0552	0.161069	6.55126	5.70546e-11	2.61298e-09
AT2G18230	AT2G18230	606.444	1.08077	0.195834	-5.5188	3.41314e-08	6.89811e-07		AT2G18230	279.034	0.324345	0.119209	2.72081	0.00651229	0.0372606
AT2G18790	AT2G18790	1809.18	0.252774	0.081988	-3.08306	0.00204882	0.0100606		AT2G18790	1540.1	0.298937	0.0936454	3.19222	0.00141182	0.0108921
AT2G18940	AT2G18940	616.843	0.407816	0.113305	-3.59928	0.000319097	0.00210587		AT2G18940	657.607	0.432862	0.0797952	5.42466	5.80659e-08	1.5653e-06
AT2G20020	AT2G20020	1103.03	0.283352	0.0981336	-2.88741	0.00388428	0.0170487		AT2G20020	917.116	0.291986	0.0932341	3.13175	0.00173768	0.0128632
AT2G20290	AT2G20290	568.618	0.43629	0.123767	-3.5251	0.000423328	0.00268514		AT2G20290	390.977	0.310703	0.0947806	3.27813	0.00104498	0.00848943
AT2G21300	AT2G21300	918.802	0.532066	0.0892962	-5.95844	2.54664e-09	6.56079e-08		AT2G21300	1152.47	0.17515	0.0672788	2.60334	0.00923191	0.0493268
AT2G21320	AT2G21320	712.339	0.59234	0.130244	-4.54793	5.4177e-06	6.13291e-05		AT2G21320	188.541	0.933622	0.18909	4.93745	7.9151e-07	1.64606e-05
AT2G21380	AT2G21380	2247.05	0.486051	0.0846583	-5.74133	9.39358e-09	2.16689e-07		AT2G21380	1340.56	0.198251	0.0674034	2.94127	0.00326874	0.02146
AT2G21590	AT2G21590	143.044	0.513736	0.192238	-2.6724	0.00753119	0.0293996		AT2G21590	141.776	0.471822	0.156929	3.0066	0.00264191	0.0180914
AT2G21860	AT2G21860	1605.69	0.742271	0.0812472	-9.13595	6.48347e-20	1.10268e-17		AT2G21860	957.837	0.401947	0.0817412	4.91732	8.77376e-07	1.80838e-05
AT2G21960	AT2G21960	2618.67	0.315176	0.0926785	-3.40075	0.000672022	0.00396904		AT2G21960	1665.34	0.24374	0.0829852	2.93715	0.00331243	0.0216854
AT2G22190	AT2G22190	746.412	0.712034	0.119743	-5.94637	2.74149e-09	7.00877e-08		AT2G22190	343.294	0.373551	0.107922	3.4613	0.000537567	0.00494125
AT2G22360	AT2G22360	1814.82	0.851338	0.132435	-6.42832	1.29019e-10	4.51095e-09		AT2G22360	733.61	0.298258	0.0841357	3.54496	0.000392679	0.00382366
AT2G22900	AT2G22900	229.984	0.36879	0.131156	-2.81184	0.00492594	0.0207294		AT2G22900	288.816	0.426319	0.137179	3.10775	0.00188515	0.0136956
AT2G23120	AT2G23120	2019.44	0.718039	0.0763611	-9.4032	5.2928e-21	1.06221e-18		AT2G23120	2782.27	0.405546	0.0867699	4.67382	2.95655e-06	5.36426e-05
AT2G23150	AT2G23150	177.846	0.744623	0.155667	-4.78342	1.72339e-06	2.2459e-05		AT2G23150	212.017	0.486937	0.126112	3.86114	0.000112859	0.00131474
AT2G24230	AT2G24230	220.85	0.451645	0.17175	-2.62966	0.00854706	0.0325671		AT2G24230	225.875	0.365958	0.109347	3.34676	0.00081763	0.00697697
AT2G24820	AT2G24820	2087.75	0.483733	0.107018	-4.52009	6.18122e-06	6.88789e-05		AT2G24820	1021.29	0.314007	0.11938	2.63032	0.00853049	0.0462443
AT2G25320	AT2G25320	716.586	0.288803	0.105236	-2.74433	0.00606348	0.0246083		AT2G25320	577.186	0.219681	0.0731429	3.00345	0.00266933	0.0182492
AT2G25690	AT2G25690	139.49	0.538609	0.138293	-3.89469	9.83229e-05	0.000765713		AT2G25690	100.702	0.68407	0.157208	4.35136	1.35293e-05	0.000206084
AT2G26280	AT2G26280	1923.19	0.223622	0.0659778	-3.38934	0.0007006	0.00409445		AT2G26280	1643.27	0.253524	0.0851996	2.97564	0.00292377	0.0195839
AT2G26690	AT2G26690	2654.33	0.395671	0.0978652	-4.04302	5.2766e-05	0.000446819		AT2G26690	1317.69	0.527176	0.111022	4.7484	2.05035e-06	3.90916e-05
AT2G26800	AT2G26800	1215.93	0.300303	0.0974126	-3.08279	0.00205068	0.010065		AT2G26800	890.088	0.215422	0.0783631	2.74902	0.00597729	0.0348113
AT2G26980	AT2G26980	1010.02	0.240745	0.0910995	-2.64266	0.00822577	0.0315707		AT2G26980	1602.48	0.956063	0.0820006	11.6592	2.05933e-31	6.70506e-29
AT2G27150	AT2G27150	711.136	0.821406	0.131004	-6.27007	3.60882e-10	1.1194e-08		AT2G27150	423.459	0.474263	0.0939656	5.0472	4.48334e-07	1.00348e-05
AT2G27950	AT2G27950	1014.85	0.757938	0.113436	-6.68165	2.36262e-11	9.22478e-10		AT2G27950	791.259	0.186251	0.065805	2.83035	0.00464965	0.0285053
AT2G30150	AT2G30150	582.014	0.421816	0.124823	-3.37931	0.000726688	0.00422599		AT2G30150	379.525	0.286885	0.0927853	3.09192	0.00198866	0.014339
AT2G31400	AT2G31400	6236.48	0.275144	0.0937962	-2.93342	0.00335248	0.0151184		AT2G31400	7002.39	0.30944	0.0520565	5.94431	2.77626e-09	9.7888e-08
AT2G31570	AT2G31570	859.466	0.434548	0.11257	-3.86026	0.000113265	0.000863973		AT2G31570	900.675	0.18663	0.0635004	2.93903	0.00329241	0.0215882
AT2G32290	AT2G32290	705.714	0.675886	0.192709	-3.50729	0.000452697	0.00282851		AT2G32290	73.976	0.641277	0.242109	2.64872	0.0080798	0.0443071
AT2G32430	AT2G32430	162.659	0.4986	0.160072	-3.11484	0.00184044	0.00922014		AT2G32430	120.329	0.418642	0.152879	2.73838	0.00617429	0.0357786
AT2G32530	AT2G32530	563.6	0.907182	0.202178	-4.48705	7.22164e-06	7.90245e-05		AT2G32530	224.457	1.34414	0.171766	7.82543	5.05925e-15	4.02384e-13
AT2G32640	AT2G32640	1260.78	0.384802	0.080722	-4.767	1.86989e-06	2.40557e-05		AT2G32640	769.1	0.32022	0.0789202	4.05751	4.95982e-05	0.000645267
AT2G33380	AT2G33380	1156.7	0.947635	0.248275	-3.81688	0.000135149	0.00100389		AT2G33380	191.535	1.83201	0.268023	6.83527	8.18496e-12	4.18035e-10
AT2G34460	AT2G34460	2858.82	0.450974	0.116353	-3.87591	0.000106228	0.000821218		AT2G34460	1324.47	0.454763	0.097101	4.6834	2.82152e-06	5.16651e-05
AT2G35130	AT2G35130	965.719	0.437078	0.0913134	-4.78657	1.69652e-06	2.21663e-05		AT2G35130	500.551	0.344956	0.0996516	3.46162	0.000536931	0.00493976
AT2G35490	AT2G35490	3683.95	0.275124	0.0878761	-3.13082	0.00174318	0.00882093		AT2G35490	2272.84	0.267079	0.0537014	4.97341	6.57866e-07	1.4089e-05
AT2G35840	AT2G35840	3078.09	0.937445	0.156179	-6.00236	1.94466e-09	5.14873e-08		AT2G35840	1405.17	0.281164	0.103123	2.72649	0.00640116	0.0367459
AT2G35960	AT2G35960	1547.06	0.324615	0.110605	-2.9349	0.0033366	0.0150612		AT2G35960	677.702	0.695321	0.133046	5.22618	1.7305e-07	4.18332e-06
AT2G36390	AT2G36390	1537.62	0.434734	0.0942695	-4.6116	3.99572e-06	4.70876e-05		AT2G36390	1344.72	0.414091	0.0882484	4.69234	2.70097e-06	4.98519e-05
AT2G36530	AT2G36530	7286.77	0.559801	0.127057	-4.40592	1.05334e-05	0.000109759		AT2G36530	9139.8	0.184383	0.046339	3.97899	6.92073e-05	0.000865112
AT2G36590	AT2G36590	162.119	1.92705	0.196967	-9.7836	1.3241e-22	3.52628e-20		AT2G36590	48.9738	0.841703	0.240174	3.50456	0.000457368	0.00433014
AT2G36630	AT2G36630	1264.52	0.714192	0.126371	-5.65156	1.58997e-08	3.46461e-07		AT2G36630	538.088	0.578582	0.129923	4.45328	8.45694e-06	0.000136082
AT2G36750	AT2G36750	31.998	1.26125	0.371626	-3.39387	0.000689115	0.004045		AT2G36750	19.229	2.10604	0.483322	4.35743	1.316e-05	0.0002009
AT2G36835	AT2G36835	1502.55	0.390468	0.119517	-3.26705	0.00108674	0.00591531		AT2G36835	663.723	0.290317	0.0942177	3.08135	0.00206068	0.0147815
AT2G36870	AT2G36870	1647.58	0.533569	0.12689	-4.20497	2.61113e-05	0.000243169		AT2G36870	421.688	0.482048	0.143602	3.35683	0.000788419	0.00678327
AT2G37240	AT2G37240	2093.25	1.02621	0.143589	-7.14688	8.87706e-13	4.51022e-11		AT2G37240	752.768	0.740148	0.109492	6.75985	1.3813e-11	6.86959e-10
AT2G37450	AT2G37450	919.621	0.382871	0.100647	-3.80409	0.000142328	0.00105052		AT2G37450	811.211	0.308628	0.100807	3.06158	0.00220169	0.015568
AT2G37630	AT2G37630	454.671	0.304355	0.112094	-2.71517	0.00662409	0.0264344		AT2G37630	854.645	0.212754	0.0714576	2.97735	0.00290753	0.0195002
AT2G37760	AT2G37760	728.563	1.43904	0.268239	-5.36476	8.10578e-08	1.49655e-06		AT2G37760	249.836	0.794664	0.155385	5.11417	3.15123e-07	7.27443e-06
AT2G37770	AT2G37770	232.286	2.08954	0.380195	-5.49596	3.88591e-08	7.73673e-07		AT2G37770	42.5376	3.38385	0.401835	8.42101	3.73253e-17	3.86957e-15
AT2G37870	AT2G37870	67.373	1.31399	0.331324	-3.96588	7.3127e-05	0.000593204		AT2G37870	20.8994	2.87493	0.615126	4.67373	2.95784e-06	5.36426e-05
AT2G38210	AT2G38210	404.847	0.673869	0.13569	-4.96624	6.8265e-07	9.94923e-06		AT2G38210	131.755	1.42937	0.244981	5.8346	5.39202e-09	1.8181e-07
AT2G38540	AT2G38540	19617.6	0.852733	0.185869	-4.58783	4.47875e-06	5.20765e-05		AT2G38540	13699.6	0.790871	0.0975388	8.10827	5.13459e-16	4.65194e-14
AT2G39450	AT2G39450	1087.71	0.822078	0.16633	-4.94245	7.71453e-07	1.10738e-05		AT2G39450	666.283	0.465514	0.0739739	6.29295	3.11484e-10	1.29555e-08
AT2G39800	AT2G39800	9782.38	1.36709	0.191067	-7.15506	8.3637e-13	4.26018e-11		AT2G39800	4486.9	2.31143	0.123021	18.789	9.29958e-79	3.22974e-75
AT2G40400	AT2G40400	4684.63	0.758089	0.122625	-6.18218	6.32239e-10	1.86594e-08		AT2G40400	1976.27	0.665761	0.0702834	9.47253	2.73137e-21	4.15447e-19
AT2G41190	AT2G41190	656.412	2.74784	0.257848	-10.6568	1.62051e-26	7.06999e-24		AT2G41190	111.41	1.45632	0.170228	8.55508	1.17789e-17	1.27838e-15
AT2G41380	AT2G41380	43.4187	1.43594	0.327434	-4.38545	1.15746e-05	0.000119307		AT2G41380	108.5	2.0077	0.309926	6.47799	9.2954e-11	4.12122e-09
AT2G41540	AT2G41540	383.544	0.505822	0.120021	-4.21443	2.50407e-05	0.000234602		AT2G41540	591.94	0.276664	0.0873212	3.16835	0.00153305	0.0116675
AT2G41680	AT2G41680	5051.94	0.44041	0.0947643	-4.64742	3.36109e-06	4.04399e-05		AT2G41680	4305.69	0.257126	0.0571418	4.49979	6.80194e-06	0.000112047
AT2G42200	AT2G42200	202.298	0.61434	0.134726	-4.55992	5.11729e-06	5.83185e-05		AT2G42200	145.104	0.611454	0.164312	3.72129	0.000198205	0.00213667
AT2G42530	AT2G42530	944.364	3.01499	0.23724	-12.7086	5.29499e-37	1.18068e-33		AT2G42530	295.413	0.849845	0.233694	3.63658	0.000276282	0.00283884
AT2G42540	AT2G42540	8816.82	1.8384	0.334336	-5.49866	3.82692e-08	7.64964e-07		AT2G42540	676.392	2.25728	0.178385	12.654	1.06286e-36	4.92176e-34
AT2G42770	AT2G42770	1060.34	0.39946	0.108883	-3.6687	0.00024379	0.00167441		AT2G42770	1301.16	0.319311	0.0693191	4.6064	4.09701e-06	7.14423e-05
AT2G43445	AT2G43445	47.7161	0.611919	0.21588	-2.83453	0.00458927	0.0195421		AT2G43445	75.2287	0.99991	0.185056	5.40328	6.54334e-08	1.74584e-06
AT2G44310	AT2G44310	764.039	0.435172	0.104029	-4.18317	2.87473e-05	0.000264041		AT2G44310	554.48	0.36976	0.0823529	4.48995	7.12413e-06	0.0001166
AT2G44620	AT2G44620	946.308	0.255105	0.0831772	-3.06701	0.00216213	0.0105243		AT2G44620	1125.39	0.282578	0.063209	4.47054	7.80237e-06	0.000126624
AT2G45280	AT2G45280	54.5852	0.523751	0.193563	-2.70584	0.00681319	0.0270868		AT2G45280	80.3178	0.562273	0.172186	3.2655	0.00109271	0.00881531
AT2G45600	AT2G45600	257.942	0.560595	0.206672	-2.71249	0.00667792	0.0266228		AT2G45600	170.51	0.838273	0.181209	4.62601	3.72785e-06	6.59991e-05
AT2G45630	AT2G45630	194.42	0.438158	0.15733	-2.78495	0.00535354	0.0222168		AT2G45630	152.887	0.438798	0.128044	3.42694	0.000610417	0.0054993
AT2G45660	AT2G45660	1859.64	0.8327	0.191773	-4.34212	1.41117e-05	0.000142962		AT2G45660	962.51	0.458865	0.109389	4.19479	2.73128e-05	0.00038172
AT2G45770	AT2G45770	993.821	0.25525	0.0760175	-3.35778	0.000785719	0.00451771		AT2G45770	1361.94	0.204796	0.0644869	3.17578	0.00149436	0.0114318
AT2G45990	AT2G45990	738.38	0.694064	0.0995888	-6.9693	3.18524e-12	1.46616e-10		AT2G45990	531.909	0.275463	0.09407	2.92828	0.00340843	0.0221884
AT2G46370	AT2G46370	1306.17	0.222477	0.0714683	-3.11294	0.00185233	0.00926582		AT2G46370	836.414	0.192934	0.0707616	2.72653	0.00640039	0.0367459
AT2G46680	AT2G46680	462.276	1.27817	0.33441	-3.82216	0.00013229	0.000985866		AT2G46680	344.618	0.964865	0.143317	6.73237	1.66922e-11	8.20358e-10
AT2G46735	AT2G46735	380.189	0.471138	0.145251	-3.24362	0.0011802	0.00636192		AT2G46735	196.57	0.513909	0.155315	3.30882	0.000936908	0.00776678
AT2G46790	AT2G46790	1520.82	0.621267	0.121841	-5.09899	3.41478e-07	5.39616e-06		AT2G46790	504.902	0.319643	0.117054	2.73074	0.00631921	0.0364544
AT2G46915	AT2G46915	1699.43	0.737147	0.0950597	-7.75456	8.86487e-15	6.42271e-13		AT2G46915	752.412	0.381798	0.103775	3.67907	0.000234082	0.00246586
AT2G47490	AT2G47490	878.984	0.448314	0.093045	-4.81824	1.44827e-06	1.92741e-05		AT2G47490	493.981	0.233497	0.0885005	2.63837	0.00833054	0.0454191
AT3G01060	AT3G01060	5765.12	0.386425	0.109043	-3.54377	0.000394442	0.00252264		AT3G01060	2113.83	0.548516	0.0924875	5.9307	3.01646e-09	1.05998e-07
AT3G01180	AT3G01180	2524.37	0.403227	0.124985	-3.2262	0.00125444	0.00669912		AT3G01180	1279.25	0.395042	0.105009	3.762	0.000168562	0.00186438
AT3G01280	AT3G01280	2057.17	0.185121	0.0741729	-2.4958	0.0125674	0.0442775		AT3G01280	2008.22	0.261128	0.051819	5.03924	4.6739e-07	1.03943e-05
AT3G02830	AT3G02830	3160.25	0.323231	0.105577	-3.06155	0.00220193	0.0106663		AT3G02830	1345.81	0.42352	0.106671	3.97034	7.17707e-05	0.000891806
AT3G03250	AT3G03250	3769.13	0.873277	0.107403	-8.13088	4.26199e-16	3.87031e-14		AT3G03250	1889.56	0.196959	0.0730543	2.69607	0.00701633	0.0395901
AT3G03710	AT3G03710	1831.63	0.313796	0.0903093	-3.47468	0.000511459	0.00313323		AT3G03710	2201.52	0.217285	0.0725564	2.99471	0.00274707	0.0186704
AT3G03770	AT3G03770	1646.05	0.61598	0.122043	-5.04724	4.4823e-07	6.84592e-06		AT3G03770	756.308	0.584159	0.126458	4.61939	3.84877e-06	6.78517e-05
AT3G03780	AT3G03780	17123	0.723114	0.138887	-5.20647	1.92463e-07	3.25952e-06		AT3G03780	5130.84	0.661076	0.109648	6.02908	1.64896e-09	6.1032e-08
AT3G04120	AT3G04120	9218.05	0.321548	0.107381	-2.99445	0.00274936	0.0128498		AT3G04120	8761.23	0.292084	0.064467	4.53075	5.8774e-06	9.83721e-05
AT3G04790	AT3G04790	3851.91	0.466811	0.112384	-4.1537	3.27141e-05	0.000294017		AT3G04790	2440.61	0.30122	0.0833262	3.61495	0.000300402	0.00304021
AT3G04870	AT3G04870	3801.38	0.835658	0.109555	-7.62775	2.38887e-14	1.57188e-12		AT3G04870	2331.67	0.338963	0.0802865	4.22192	2.42229e-05	0.000346435
AT3G05030	AT3G05030	1452.11	0.950069	0.152949	-6.21168	5.24216e-10	1.5868e-08		AT3G05030	291.14	0.542335	0.137521	3.94367	8.02449e-05	0.000978434
AT3G05500	AT3G05500	385.614	0.964643	0.127049	-7.5927	3.13318e-14	2.04155e-12		AT3G05500	463.764	0.324342	0.087809	3.69372	0.000220994	0.00234952
AT3G05640	AT3G05640	1343.42	2.04419	0.175782	-11.6291	2.93127e-31	2.80131e-28		AT3G05640	229.352	1.18875	0.12543	9.47738	2.60751e-21	4.02484e-19
AT3G05880	AT3G05880	325.01	0.636163	0.157945	-4.02775	5.63135e-05	0.000473264		AT3G05880	1014.06	0.356151	0.124509	2.86044	0.00423048	0.0265047
AT3G06010	AT3G06010	639.932	0.48307	0.0956768	-5.04898	4.44168e-07	6.79872e-06		AT3G06010	679.801	0.276655	0.0805667	3.43386	0.000595053	0.00538649
AT3G06510	AT3G06510	4765.12	0.766039	0.143246	-5.34774	8.90614e-08	1.63829e-06		AT3G06510	1757.19	0.471891	0.0959776	4.91668	8.8024e-07	1.81249e-05
AT3G06980	AT3G06980	2664.06	0.31832	0.121403	-2.622	0.00874142	0.0331378		AT3G06980	2418.09	0.277118	0.0691028	4.01022	6.06609e-05	0.000773121
AT3G07480	AT3G07480	1084.8	0.192184	0.0732858	-2.6224	0.00873139	0.0331248		AT3G07480	1318.4	0.189156	0.069295	2.72973	0.00633868	0.0365078
AT3G07720	AT3G07720	618.427	0.813586	0.125975	-6.45833	1.05867e-10	3.76043e-09		AT3G07720	388.813	0.266212	0.0977054	2.72464	0.00643712	0.0369014
AT3G08590	AT3G08590	3539.24	0.631756	0.0978033	-6.45945	1.05081e-10	3.73915e-09		AT3G08590	1806.14	0.647082	0.0867679	7.45762	8.80991e-14	5.96042e-12
AT3G09415	AT3G09415	64.6949	1.12556	0.266803	-4.2187	2.45714e-05	0.000231187		AT3G09415	49.764	1.08855	0.235764	4.61713	3.89077e-06	6.83607e-05
AT3G10080	AT3G10080	285.064	0.384367	0.107474	-3.57637	0.000348393	0.00226789		AT3G10080	256.627	0.446081	0.124274	3.58949	0.000331327	0.00331773
AT3G10230	AT3G10230	2426.81	0.423408	0.0993631	-4.26122	2.03316e-05	0.000196549		AT3G10230	1114.43	0.237336	0.0887909	2.67298	0.00751806	0.0419554
AT3G10340	AT3G10340	157.474	1.35116	0.208457	-6.48168	9.07051e-11	3.26815e-09		AT3G10340	262.869	0.432982	0.136998	3.1605	0.00157496	0.0119212
AT3G10670	AT3G10670	1732.04	0.405289	0.0874146	-4.6364	3.54537e-06	4.24789e-05		AT3G10670	1270.37	0.326239	0.0773184	4.21943	2.44925e-05	0.000349093
AT3G10840	AT3G10840	812.466	0.858633	0.100964	-8.50432	1.82661e-17	2.09476e-15		AT3G10840	465.754	0.531899	0.0885303	6.00811	1.87703e-09	6.82441e-08
AT3G11090	AT3G11090	486.745	0.31079	0.119468	-2.60145	0.00928301	0.0348356		AT3G11090	220.887	0.650578	0.117226	5.54978	2.86022e-08	8.22087e-07
AT3G11945	AT3G11945	1565.74	0.423133	0.0792226	-5.34107	9.24017e-08	1.6889e-06		AT3G11945	1030.82	0.209963	0.0782121	2.68454	0.00726297	0.040772
AT3G12490	AT3G12490	778.766	0.400451	0.120152	-3.33287	0.000859542	0.00486194		AT3G12490	863.586	0.316111	0.0825667	3.82855	0.000128898	0.00147177
AT3G14440	AT3G14440	267.182	0.864073	0.281475	-3.0698	0.00214201	0.0104492		AT3G14440	86.7577	1.23974	0.29545	4.1961	2.71556e-05	0.000380033
AT3G14650	AT3G14650	3339.65	0.280368	0.0955362	-2.93468	0.00333893	0.0150684		AT3G14650	2087.51	0.202774	0.072796	2.78551	0.00534438	0.0317012
AT3G14660	AT3G14660	2302.54	0.323385	0.0771439	-4.19197	2.76543e-05	0.000255287		AT3G14660	2243.56	0.416928	0.0699145	5.9634	2.47035e-09	8.78451e-08
AT3G14690	AT3G14690	2746.12	0.9629	0.137645	-6.99555	2.64225e-12	1.23607e-10		AT3G14690	1465.76	0.412318	0.0877694	4.69774	2.6306e-06	4.88125e-05
AT3G15020	AT3G15020	403.226	0.477779	0.13329	-3.58451	0.000337708	0.00221124		AT3G15020	446.309	0.449329	0.0991725	4.53078	5.87649e-06	9.83721e-05
AT3G15030	AT3G15030	826.217	0.648949	0.130097	-4.98821	6.09418e-07	8.99957e-06		AT3G15030	710.954	0.405109	0.106724	3.79584	0.000147142	0.0016467
AT3G15354	AT3G15354	1857.69	0.328288	0.105448	-3.11328	0.00185022	0.00925755		AT3G15354	885.669	0.403806	0.114527	3.52585	0.000422124	0.0040573
AT3G16520	AT3G16520	4089.11	0.266325	0.0927446	-2.8716	0.00408406	0.0177563		AT3G16520	2517.03	0.250869	0.0743417	3.37454	0.000739386	0.00645244
AT3G17070	AT3G17070	427.374	0.55916	0.180991	-3.08944	0.00200532	0.0098833		AT3G17070	156.954	0.674681	0.15379	4.38703	1.14911e-05	0.000177767
AT3G17640	AT3G17640	491.325	0.530126	0.124797	-4.24789	2.1579e-05	0.000207111		AT3G17640	157.66	0.441805	0.148005	2.98507	0.00283516	0.0191442
AT3G17930	AT3G17930	2140.36	0.475034	0.0958171	-4.95772	7.13266e-07	1.03578e-05		AT3G17930	1323.56	0.316842	0.0772108	4.1036	4.06768e-05	0.000545096
AT3G18440	AT3G18440	492.159	0.641474	0.144134	-4.45055	8.56496e-06	9.12389e-05		AT3G18440	349.124	0.37553	0.0987801	3.80168	0.00014372	0.0016136
AT3G19170	AT3G19170	15257.2	0.564694	0.0742108	-7.60932	2.75536e-14	1.80122e-12		AT3G19170	8274.13	0.230475	0.0751394	3.0673	0.00216005	0.0153412
AT3G20720	AT3G20720	865.626	0.442095	0.0842523	-5.24728	1.54362e-07	2.67751e-06		AT3G20720	569.902	0.237501	0.0841994	2.8207	0.00479186	0.0291967
AT3G21110	AT3G21110	441.692	0.630775	0.125553	-5.02396	5.06179e-07	7.60936e-06		AT3G21110	468.848	0.313138	0.102313	3.06057	0.00220915	0.0156101
AT3G21660	AT3G21660	14.4979	1.57983	0.347376	-4.54791	5.41813e-06	6.13291e-05		AT3G21660	6.75112	2.40538	0.743554	3.23498	0.00121651	0.00963135
AT3G21670	AT3G21670	3632.86	0.447886	0.100639	-4.45044	8.56959e-06	9.12389e-05		AT3G21670	1153.86	0.928407	0.140263	6.61905	3.61522e-11	1.6929e-09
AT3G23070	AT3G23070	1114.84	0.326567	0.074082	-4.40818	1.04243e-05	0.000108861		AT3G23070	1229.5	0.407546	0.095811	4.25364	2.10319e-05	0.000304772
AT3G23400	AT3G23400	7841.93	0.364861	0.0941776	-3.87418	0.000106983	0.000826418		AT3G23400	3549.26	0.279418	0.0953338	2.93095	0.00337932	0.0220401
AT3G24170	AT3G24170	3466.63	1.02742	0.126196	-8.1415	3.90426e-16	3.56157e-14		AT3G24170	2496.33	0.335292	0.0887407	3.77834	0.00015788	0.00175649
AT3G24460	AT3G24460	1628.56	0.714198	0.243406	-2.93419	0.00334425	0.015089		AT3G24460	152.491	0.807726	0.231369	3.49107	0.000481092	0.0045117
AT3G25740	AT3G25740	469.343	0.353064	0.117097	-3.01514	0.00256864	0.0121466		AT3G25740	191.64	0.394394	0.123643	3.18978	0.00142381	0.0109724
AT3G26290	AT3G26290	3180.72	0.461065	0.137503	-3.35313	0.000799045	0.00457682		AT3G26290	1065.86	0.381842	0.0773148	4.9388	7.86049e-07	1.63797e-05
AT3G26310	AT3G26310	641.785	0.465718	0.122958	-3.78761	0.000152106	0.00111409		AT3G26310	287.472	0.333675	0.114498	2.91424	0.00356551	0.0230168
AT3G27240	AT3G27240	1337.95	0.402389	0.123429	-3.26008	0.00111379	0.00604618		AT3G27240	1327.32	0.262067	0.0801395	3.27014	0.00107495	0.00869555
AT3G27250	AT3G27250	492.484	1.71129	0.361763	-4.73042	2.24056e-06	2.81212e-05		AT3G27250	42.3957	3.48645	0.389433	8.95263	3.47113e-19	4.27996e-17
AT3G27350	AT3G27350	678.103	0.52623	0.141988	-3.70617	0.00021042	0.00147561		AT3G27350	452.25	0.466792	0.134349	3.47447	0.00051186	0.00474895
AT3G27820	AT3G27820	5366.57	0.532205	0.116225	-4.5791	4.66972e-06	5.38291e-05		AT3G27820	2256.68	0.303967	0.0777329	3.9104	9.21427e-05	0.00110285
AT3G29575	AT3G29575	561.906	2.52916	0.272957	-9.26578	1.93659e-20	3.59864e-18		AT3G29575	219.708	1.33054	0.165553	8.03695	9.21024e-16	7.99679e-14
AT3G30300	AT3G30300	1037.69	0.319997	0.107066	-2.98877	0.002801	0.0130516		AT3G30300	976.407	0.41564	0.068648	6.05466	1.40715e-09	5.28326e-08
AT3G44020	AT3G44020	506.537	0.441024	0.116216	-3.79487	0.00014772	0.00108553		AT3G44020	323.757	0.391169	0.125055	3.12797	0.00176017	0.0129973
AT3G44100	AT3G44100	924.134	0.584368	0.135025	-4.32785	1.5057e-05	0.000151165		AT3G44100	550.454	0.32679	0.0931647	3.50766	0.000452074	0.00428758
AT3G44880	AT3G44880	1859.09	0.587074	0.160216	-3.66426	0.000248056	0.0016979		AT3G44880	1069.5	0.345865	0.0972755	3.55552	0.00037723	0.00370265
AT3G44990	AT3G44990	5050.92	0.894477	0.200227	-4.46732	7.92038e-06	8.55051e-05		AT3G44990	913.557	0.572491	0.169778	3.37201	0.000746219	0.00649701
AT3G45600	AT3G45600	828.612	0.473342	0.117067	-4.04335	5.26935e-05	0.000446393		AT3G45600	396.589	0.613313	0.133257	4.60248	4.17489e-06	7.2618e-05
AT3G46980	AT3G46980	733.26	0.419659	0.0943227	-4.44919	8.61965e-06	9.16735e-05		AT3G46980	491.86	0.255984	0.0871405	2.9376	0.0033076	0.0216605
AT3G47520	AT3G47520	1565.32	0.477054	0.137974	-3.45757	0.000545071	0.00331385		AT3G47520	1554.52	0.189118	0.0552121	3.42529	0.000614135	0.00552324
AT3G48200	AT3G48200	4835.94	0.319556	0.108655	-2.94101	0.00327143	0.0148438		AT3G48200	2011.18	0.391891	0.0981051	3.9946	6.48038e-05	0.000818414
AT3G48240	AT3G48240	131.65	1.29924	0.259209	-5.01234	5.37726e-07	8.05345e-06		AT3G48240	18.1653	1.19182	0.389831	3.05726	0.00223367	0.0157354
AT3G48350	AT3G48350	88.3899	0.760515	0.307925	-2.46981	0.0135187	0.0468982		AT3G48350	297.953	0.616394	0.10948	5.63018	1.80024e-08	5.36674e-07
AT3G48460	AT3G48460	1289.8	0.985118	0.166279	-5.92448	3.13291e-09	7.8988e-08		AT3G48460	313.442	0.555018	0.153887	3.60666	0.000310162	0.00312834
AT3G48690	AT3G48690	2145.19	0.427178	0.110346	-3.87125	0.000108277	0.000833213		AT3G48690	1155.3	0.533627	0.110241	4.84056	1.29474e-06	2.59172e-05
AT3G48990	AT3G48990	3412.23	0.501267	0.156772	-3.19742	0.00138662	0.0072734		AT3G48990	3948.9	0.916753	0.0985526	9.30217	1.37603e-20	1.88643e-18
AT3G50380	AT3G50380	1379.27	0.345075	0.0788933	-4.37395	1.2202e-05	0.000125132		AT3G50380	1156.31	0.219017	0.0752608	2.9101	0.00361313	0.0232737
AT3G50970	AT3G50970	183.452	3.5762	0.193414	-18.4899	2.48998e-76	4.99714e-72		AT3G50970	325.934	1.11334	0.398954	2.79063	0.00526048	0.0312836
AT3G51250	AT3G51250	876.826	0.561111	0.146292	-3.83555	0.000125282	0.000940976		AT3G51250	628.698	0.260082	0.076483	3.40052	0.000672585	0.00596296
AT3G51895	AT3G51895	2637.81	0.509256	0.0924392	-5.50909	3.60694e-08	7.24602e-07		AT3G51895	707.077	1.13553	0.151951	7.473	7.8385e-14	5.32048e-12
AT3G52180	AT3G52180	1492.2	0.391477	0.158578	-2.46867	0.0135616	0.0470064		AT3G52180	798.465	0.368164	0.0906348	4.06206	4.8641e-05	0.000636672
AT3G52640	AT3G52640	685.687	0.45329	0.0990208	-4.57772	4.70068e-06	5.41199e-05		AT3G52640	572.319	0.275406	0.077995	3.53107	0.000413886	0.0039947
AT3G52880	AT3G52880	7491.17	0.350018	0.075678	-4.6251	3.74426e-06	4.44636e-05		AT3G52880	5581.69	0.265218	0.0722772	3.66946	0.000243065	0.00254778
AT3G54390	AT3G54390	183.067	0.513208	0.179672	-2.85635	0.00428538	0.0185073		AT3G54390	166.927	0.590071	0.136724	4.31578	1.59041e-05	0.00023894
AT3G54660	AT3G54660	8166.94	0.848041	0.126459	-6.70606	1.99954e-11	7.91496e-10		AT3G54660	4456.67	0.384531	0.0661278	5.81497	6.06443e-09	2.01227e-07
AT3G54900	AT3G54900	4021.14	0.352296	0.0833336	-4.22754	2.36265e-05	0.000223239		AT3G54900	2155.46	0.295579	0.0790075	3.74115	0.000183183	0.00199809
AT3G55120	AT3G55120	199.941	0.65477	0.200802	-3.26078	0.00111108	0.00603633		AT3G55120	252.372	0.436747	0.133649	3.26786	0.00108364	0.00875227
AT3G55440	AT3G55440	8059.82	0.188746	0.0740709	-2.54817	0.0108288	0.0394275		AT3G55440	8414.7	0.336559	0.0621104	5.41873	6.00255e-08	1.61187e-06
AT3G55610	AT3G55610	2268.83	0.418874	0.111223	-3.76609	0.000165823	0.00119968		AT3G55610	2240.31	0.298363	0.0938845	3.17798	0.00148303	0.0113615
AT3G55800	AT3G55800	35188.2	0.237995	0.0971256	-2.45039	0.0142702	0.0489972		AT3G55800	18950.2	0.294757	0.0834912	3.5304	0.000414938	0.00400285
AT3G56080	AT3G56080	1141.42	0.675837	0.161604	-4.18205	2.88898e-05	0.000264986		AT3G56080	410.869	0.426931	0.139597	3.05831	0.00222588	0.015707
AT3G56140	AT3G56140	2215.25	0.452466	0.145685	-3.10579	0.00189771	0.00945277		AT3G56140	1300.3	0.226641	0.0632506	3.58322	0.000339381	0.00337245
AT3G56940	AT3G56940	46062.7	0.479379	0.0666671	-7.19064	6.44899e-13	3.35297e-11		AT3G56940	24251.7	0.225657	0.078055	2.891	0.00384019	0.0243935
AT3G57180	AT3G57180	594.551	0.374512	0.110073	-3.40239	0.000667985	0.00394985		AT3G57180	597.268	0.296092	0.0879423	3.36689	0.000760205	0.00660048
AT3G57540	AT3G57540	193.587	0.740465	0.260076	-2.84711	0.00441186	0.0189475		AT3G57540	77.2183	0.845493	0.208876	4.04783	5.16948e-05	0.000667007
AT3G58560	AT3G58560	1423.9	0.42596	0.0675597	-6.30495	2.88295e-10	9.08286e-09		AT3G58560	1187.46	0.283536	0.0694077	4.08508	4.40618e-05	0.000582588
AT3G60520	AT3G60520	170.139	0.788184	0.159774	-4.93312	8.09246e-07	1.15428e-05		AT3G60520	98.9874	0.630825	0.172613	3.65455	0.00025763	0.00267667
AT3G60750	AT3G60750	52234.7	0.482015	0.0891812	-5.4049	6.48457e-08	1.22196e-06		AT3G60750	33666.1	0.302144	0.0588927	5.13042	2.89093e-07	6.70838e-06
AT3G61220	AT3G61220	1888.74	0.462151	0.11176	-4.13522	3.54618e-05	0.000316303		AT3G61220	722.469	0.524336	0.1426	3.67698	0.000236012	0.00248248
AT3G61490	AT3G61490	82.6464	1.13261	0.23503	-4.81899	1.44287e-06	1.92278e-05		AT3G61490	179.807	0.860336	0.129077	6.66531	2.64102e-11	1.26806e-09
AT3G62700	AT3G62700	4599.16	0.640018	0.0946255	-6.7637	1.34512e-11	5.46463e-10		AT3G62700	2426	0.387903	0.0604752	6.41425	1.41521e-10	6.15661e-09
AT3G62740	AT3G62740	21.5479	0.724734	0.287656	-2.51945	0.0117539	0.042003		AT3G62740	196.555	0.725514	0.222796	3.25641	0.00112833	0.00905272
AT3G63520	AT3G63520	9024.47	0.529689	0.12749	-4.15475	3.25639e-05	0.00029306		AT3G63520	4090.68	0.377685	0.06811	5.54521	2.93595e-08	8.41532e-07
AT4G00370	AT4G00370	2710.1	0.641665	0.0838569	-7.6519	1.98032e-14	1.3292e-12		AT4G00370	1606.7	0.376811	0.0781287	4.82296	1.41442e-06	2.79637e-05
AT4G01050	AT4G01050	14632	0.255556	0.0547582	-4.66699	3.05647e-06	3.70861e-05		AT4G01050	11033.5	0.242507	0.0663582	3.65451	0.000257674	0.00267667
AT4G01870	AT4G01870	244.939	0.973195	0.168338	-5.78121	7.41657e-09	1.7511e-07		AT4G01870	555.073	2.6072	0.168632	15.4609	6.36708e-54	8.84515e-51
AT4G01883	AT4G01883	1308.16	0.707689	0.11409	-6.20292	5.5424e-10	1.66015e-08		AT4G01883	653.143	0.339679	0.103119	3.29406	0.000987512	0.00812708
AT4G02280	AT4G02280	154.437	1.51968	0.237903	-6.38781	1.68278e-10	5.68546e-09		AT4G02280	98.5063	1.25314	0.20916	5.9913	2.08169e-09	7.49699e-08
AT4G02890	AT4G02890	3816.17	0.390085	0.104665	-3.72699	0.000193781	0.00137601		AT4G02890	2238.32	0.271881	0.0958743	2.83581	0.00457101	0.0281688
AT4G03200	AT4G03200	1562.12	0.613732	0.12111	-5.06755	4.0296e-07	6.25867e-06		AT4G03200	865.821	0.353645	0.0787357	4.49155	7.07066e-06	0.000115923
AT4G04020	AT4G04020	17581	1.15541	0.138688	-8.33097	8.01824e-17	8.00587e-15		AT4G04020	1616.65	0.565013	0.107943	5.23437	1.6555e-07	4.03949e-06
AT4G06534	AT4G06534	233.385	1.60399	0.223365	-7.18104	6.91837e-13	3.57847e-11		AT4G06534	85.211	1.02492	0.212432	4.82472	1.40203e-06	2.77979e-05
AT4G06536	AT4G06536	89.4361	1.52842	0.219654	-6.95831	3.44391e-12	1.57439e-10		AT4G06536	40.1874	1.08951	0.314601	3.46315	0.000533889	0.00492047
AT4G09350	AT4G09350	1269.44	0.648399	0.117146	-5.53496	3.11305e-08	6.36789e-07		AT4G09350	413.318	0.412613	0.130158	3.1701	0.00152388	0.0116105
AT4G09650	AT4G09650	30742.4	0.260997	0.0730917	-3.57082	0.000355868	0.00230682		AT4G09650	18565.8	0.248714	0.0745824	3.33476	0.000853736	0.0072465
AT4G11330	AT4G11330	366.104	0.44455	0.177492	-2.50463	0.0122581	0.0433876		AT4G11330	279.885	0.423054	0.107103	3.94998	7.8157e-05	0.000956333
AT4G11600	AT4G11600	1410.74	1.08072	0.168358	-6.41914	1.37048e-10	4.75028e-09		AT4G11600	1186.46	0.576925	0.119607	4.82351	1.41054e-06	2.79135e-05
AT4G12000	AT4G12000	273.684	0.781538	0.146276	-5.34291	9.14671e-08	1.67334e-06		AT4G12000	79.688	0.698674	0.209927	3.32817	0.000874174	0.00736001
AT4G12320	AT4G12320	5225.89	0.71125	0.134313	-5.29548	1.18706e-07	2.12516e-06		AT4G12320	938.22	0.332754	0.109218	3.04669	0.00231377	0.0162283
AT4G13800	AT4G13800	756.665	1.35066	0.196002	-6.89106	5.53772e-12	2.43187e-10		AT4G13800	94.7466	1.1939	0.210101	5.6825	1.32739e-08	4.07251e-07
AT4G14690	AT4G14690	179.944	4.77214	0.290522	-16.4261	1.24446e-60	1.24875e-56		AT4G14690	53.2613	1.23301	0.287675	4.28612	1.81819e-05	0.000267945
AT4G15450	AT4G15450	517.529	0.579469	0.0942679	-6.14704	7.89412e-10	2.28281e-08		AT4G15450	254.625	0.690693	0.153628	4.49587	6.92855e-06	0.000113862
AT4G15490	AT4G15490	1281.26	1.34524	0.170712	-7.88017	3.26943e-15	2.56306e-13		AT4G15490	288.949	0.967565	0.121666	7.95265	1.82566e-15	1.52783e-13
AT4G15550	AT4G15550	1056.46	0.338169	0.0978581	-3.45571	0.000548842	0.00333375		AT4G15550	351.244	0.599434	0.173705	3.45088	0.000558768	0.00510237
AT4G16146	AT4G16146	188.809	1.76923	0.179133	-9.8766	5.25893e-23	1.50774e-20		AT4G16146	46.3661	0.902009	0.339096	2.66004	0.00781315	0.0432661
AT4G16690	AT4G16690	407.83	0.816659	0.172227	-4.74176	2.11872e-06	2.67594e-05		AT4G16690	170.065	0.61308	0.155771	3.93578	8.2926e-05	0.00100641
AT4G16880	AT4G16880	1234.16	0.383078	0.107424	-3.56603	0.000362429	0.0023433		AT4G16880	462.991	0.591998	0.0896346	6.60458	3.98651e-11	1.85841e-09
AT4G17340	AT4G17340	7800.58	1.07752	0.164512	-6.54984	5.75991e-11	2.12492e-09		AT4G17340	2010.19	0.375671	0.107412	3.49748	0.000469668	0.00442448
AT4G17550	AT4G17550	603.776	1.51419	0.176554	-8.57633	9.79513e-18	1.17712e-15		AT4G17550	256.238	0.442375	0.131065	3.37524	0.00073751	0.006441
AT4G18270	AT4G18270	474.993	1.35889	0.123089	-11.0399	2.45328e-28	1.36764e-25		AT4G18270	216.081	0.705497	0.129868	5.43241	5.55976e-08	1.5046e-06
AT4G19710	AT4G19710	2210.28	0.509192	0.0836025	-6.09062	1.12471e-09	3.14809e-08		AT4G19710	1674.4	0.334386	0.0775721	4.31065	1.62778e-05	0.000243152
AT4G21470	AT4G21470	523.901	0.383956	0.108876	-3.52654	0.000421035	0.00267143		AT4G21470	446.866	0.243975	0.0834871	2.92231	0.00347443	0.0225475
AT4G21570	AT4G21570	943.028	0.604483	0.14256	-4.24019	2.23328e-05	0.000213427		AT4G21570	545.613	0.442654	0.0984405	4.49667	6.90275e-06	0.000113528
AT4G21580	AT4G21580	662.625	0.399537	0.116325	-3.43468	0.00059326	0.00356792		AT4G21580	591.546	0.217256	0.0787962	2.75719	0.00583006	0.0341159
AT4G21940	AT4G21940	153.902	0.75299	0.162622	-4.63031	3.65111e-06	4.35378e-05		AT4G21940	64.4482	0.78915	0.220126	3.585	0.000337079	0.00336003
AT4G22220	AT4G22220	2084.35	0.237747	0.0811021	-2.93146	0.00337376	0.015193		AT4G22220	1595.68	0.30471	0.0693094	4.39638	1.10071e-05	0.000171424
AT4G22240	AT4G22240	5327.6	1.00247	0.127464	-7.86469	3.70013e-15	2.88941e-13		AT4G22240	2226.09	0.491101	0.097321	5.0462	4.50695e-07	1.00768e-05
AT4G22970	AT4G22970	92.7748	0.481034	0.186725	-2.57616	0.00999031	0.0370092		AT4G22970	186.595	0.341709	0.121888	2.80347	0.00505559	0.0303948
AT4G23020	AT4G23020	437.776	0.557539	0.158516	-3.51724	0.00043606	0.0027468		AT4G23020	152.521	0.867547	0.141759	6.11986	9.36601e-10	3.63443e-08
AT4G23500	AT4G23500	454.27	0.96615	0.162794	-5.93479	2.94215e-09	7.4459e-08		AT4G23500	401.358	0.703035	0.120589	5.83001	5.54253e-09	1.86282e-07
AT4G23940	AT4G23940	1322.49	0.413208	0.0904438	-4.56867	4.90817e-06	5.63191e-05		AT4G23940	1392.56	0.347539	0.077197	4.50197	6.73256e-06	0.000110991
AT4G24620	AT4G24620	3925.85	0.532303	0.0954394	-5.5774	2.44146e-08	5.11993e-07		AT4G24620	2554.23	0.232359	0.0631342	3.6804	0.000232865	0.00245445
AT4G24930	AT4G24930	1791.76	0.557748	0.135174	-4.12616	3.6887e-05	0.000327705		AT4G24930	1416.52	0.315168	0.0664808	4.74074	2.12938e-06	4.04485e-05
AT4G24960	AT4G24960	601.262	1.73037	0.161024	-10.7461	6.18483e-27	2.88659e-24		AT4G24960	328.864	0.65492	0.103833	6.30745	2.83662e-10	1.18932e-08
AT4G24972	AT4G24972	518.066	0.346277	0.139629	-2.47998	0.013139	0.0458666		AT4G24972	326.168	0.64222	0.106696	6.01917	1.75317e-09	6.43177e-08
AT4G25450	AT4G25450	1228.29	0.580601	0.118626	-4.89437	9.86207e-07	1.36781e-05		AT4G25450	918.587	0.466587	0.090471	5.15731	2.50527e-07	5.90552e-06
AT4G25480	AT4G25480	112.883	1.63399	0.172598	-9.46706	2.87839e-21	6.08068e-19		AT4G25480	16.6651	1.76211	0.543595	3.24159	0.00118866	0.00944673
AT4G25520	AT4G25520	555.605	0.250274	0.0970081	-2.57993	0.00988208	0.0366858		AT4G25520	518.604	0.263327	0.095615	2.75403	0.00588664	0.0343698
AT4G25670	AT4G25670	655.166	0.382674	0.113875	-3.36048	0.000778083	0.00448331		AT4G25670	440.027	0.241611	0.0867551	2.78498	0.00535314	0.031726
AT4G26080	AT4G26080	1547.17	1.19554	0.155322	-7.69717	1.39112e-14	9.7617e-13		AT4G26080	818.586	0.32408	0.102662	3.15676	0.00159534	0.0120404
AT4G26530	AT4G26530	25465	0.460054	0.159166	-2.8904	0.00384747	0.0169185		AT4G26530	9712.81	0.41525	0.133273	3.11578	0.00183457	0.0134277
AT4G26700	AT4G26700	2747.28	0.822148	0.0733713	-11.2053	3.84048e-29	2.40858e-26		AT4G26700	1341.73	0.255302	0.0650653	3.92379	8.71669e-05	0.00105176
AT4G27520	AT4G27520	9046.33	1.56124	0.14206	-10.99	4.26953e-28	2.19705e-25		AT4G27520	4399.54	0.667849	0.052159	12.8041	1.55528e-37	7.53695e-35
AT4G27560	AT4G27560	429.073	0.593931	0.206172	-2.88076	0.00396721	0.0173715		AT4G27560	429.629	0.267668	0.100858	2.65392	0.00795638	0.0438446
AT4G27700	AT4G27700	6131.97	0.42508	0.0844458	-5.03376	4.80951e-07	7.28468e-06		AT4G27700	3530.13	0.402566	0.070387	5.71933	1.06944e-08	3.37142e-07
AT4G27830	AT4G27830	1035.69	0.96977	0.16493	-5.87988	4.10557e-09	1.0085e-07		AT4G27830	473.657	0.560151	0.0892186	6.27841	3.42054e-10	1.41143e-08
AT4G28080	AT4G28080	21310.7	0.274248	0.0713737	-3.84243	0.000121824	0.00091982		AT4G28080	12976.7	0.251624	0.0708921	3.54939	0.000386128	0.00376515
AT4G28660	AT4G28660	4131.28	0.517283	0.106918	-4.83811	1.3108e-06	1.76317e-05		AT4G28660	2770.99	0.540692	0.095021	5.69024	1.2686e-08	3.92212e-07
AT4G28730	AT4G28730	587.222	0.372339	0.116144	-3.20583	0.00134673	0.00709383		AT4G28730	313.223	0.407887	0.102618	3.97482	7.04338e-05	0.000878336
AT4G29590	AT4G29590	1337.49	0.695637	0.109317	-6.36349	1.97222e-10	6.54223e-09		AT4G29590	671.431	0.317496	0.0880639	3.6053	0.000311797	0.00314331
AT4G30650	AT4G30650	811.683	1.3075	0.181761	-7.19351	6.31481e-13	3.29174e-11		AT4G30650	480.206	0.87374	0.123244	7.0895	1.34601e-12	7.64258e-11
AT4G30950	AT4G30950	10934.6	0.38703	0.0883765	-4.37933	1.19042e-05	0.00012239		AT4G30950	8854.37	0.24895	0.0800216	3.11104	0.00186433	0.0135883
AT4G31560	AT4G31560	925.604	0.305343	0.0945987	-3.22777	0.00124759	0.00667177		AT4G31560	663.444	0.4039	0.0988622	4.08548	4.39859e-05	0.000581954
AT4G31990	AT4G31990	2883.89	0.240612	0.0957995	-2.51162	0.0120179	0.0427333		AT4G31990	3065.49	0.205426	0.0465167	4.41619	1.00457e-05	0.000158106
AT4G32770	AT4G32770	2360.3	1.11209	0.142073	-7.82759	4.97294e-15	3.79475e-13		AT4G32770	737.006	0.541278	0.113059	4.78758	1.68808e-06	3.28749e-05
AT4G32920	AT4G32920	552.246	0.514048	0.163811	-3.13805	0.00170077	0.00863463		AT4G32920	415.741	0.638708	0.114628	5.57199	2.51844e-08	7.32949e-07
AT4G33550	AT4G33550	127.91	1.42205	0.251175	-5.66159	1.49979e-08	3.30761e-07		AT4G33550	56.0029	1.67183	0.361767	4.6213	3.81337e-06	6.73986e-05
AT4G34000	AT4G34000	1837.21	0.745847	0.229927	-3.24384	0.00117931	0.00635881		AT4G34000	1105.11	1.03315	0.0852645	12.117	8.58724e-34	3.19537e-31
AT4G34190	AT4G34190	5865.96	0.346341	0.0974375	-3.55449	0.000378715	0.00243526		AT4G34190	4006.91	0.435805	0.0870192	5.00814	5.49577e-07	1.20043e-05
AT4G34240	AT4G34240	3130.48	0.847056	0.110442	-7.66969	1.72416e-14	1.17795e-12		AT4G34240	1291	0.300629	0.080789	3.72116	0.000198308	0.00213668
AT4G34350	AT4G34350	14247.3	0.516929	0.0838187	-6.16723	6.94978e-10	2.03911e-08		AT4G34350	7945.73	0.230737	0.0873991	2.64004	0.00828972	0.0452676
AT4G34540	AT4G34540	173.084	0.587114	0.191923	-3.05912	0.0022199	0.0107456		AT4G34540	136.182	0.416815	0.141564	2.94436	0.00323623	0.0212801
AT4G34650	AT4G34650	274.835	0.804926	0.192673	-4.17767	2.94506e-05	0.000269269		AT4G34650	137.779	0.708775	0.15544	4.5598	5.12025e-06	8.71382e-05
AT4G34730	AT4G34730	1497.13	0.375701	0.0712302	-5.27447	1.33142e-07	2.34801e-06		AT4G34730	1558.17	0.272342	0.0916822	2.9705	0.0029732	0.0198639
AT4G34830	AT4G34830	3971.48	0.326062	0.0931691	-3.49968	0.00046581	0.00289512		AT4G34830	2562.01	0.247286	0.0680134	3.63584	0.000277079	0.00284562
AT4G35000	AT4G35000	5183.8	0.462376	0.0754271	-6.1301	8.78254e-10	2.51436e-08		AT4G35000	3232.45	0.294669	0.0784518	3.75605	0.000172618	0.00190449
AT4G35090	AT4G35090	42775.2	0.681387	0.157261	-4.33284	1.47201e-05	0.000148526		AT4G35090	15169.4	0.586114	0.109751	5.34042	9.27323e-08	2.38562e-06
AT4G35250	AT4G35250	6416.97	0.418168	0.102975	-4.06087	4.88892e-05	0.000418404		AT4G35250	3993.74	0.303528	0.0990246	3.06517	0.00217544	0.0154243
AT4G35290	AT4G35290	503.433	0.316898	0.109013	-2.90697	0.00364949	0.0161753		AT4G35290	145.867	0.81666	0.14237	5.73618	9.68339e-09	3.08065e-07
AT4G35300	AT4G35300	1472.18	0.753037	0.136323	-5.52392	3.31512e-08	6.71353e-07		AT4G35300	1194.3	0.242532	0.0693321	3.49812	0.000468559	0.00441602
AT4G36390	AT4G36390	2342.55	0.289473	0.0716231	-4.04161	5.30846e-05	0.000449327		AT4G36390	1650.11	0.384713	0.0728003	5.2845	1.26052e-07	3.16904e-06
AT4G37000	AT4G37000	2098	0.307154	0.119148	-2.57791	0.00993998	0.0368719		AT4G37000	924.313	0.355016	0.0947368	3.7474	0.000178679	0.00196171
AT4G37180	AT4G37180	675.236	0.669616	0.214054	-3.12826	0.00175846	0.00888482		AT4G37180	568.977	0.907124	0.124988	7.25766	3.93841e-13	2.39967e-11
AT4G37270	AT4G37270	1727.61	0.366057	0.0954201	-3.83627	0.000124917	0.000938583		AT4G37270	1170.87	0.308282	0.0718845	4.28857	1.79827e-05	0.000265574
AT4G37680	AT4G37680	1350.58	0.495424	0.117782	-4.20627	2.59619e-05	0.00024211		AT4G37680	506.101	0.300847	0.101465	2.96504	0.00302643	0.0201592
AT4G38100	AT4G38100	357.667	0.591576	0.193486	-3.05745	0.00223226	0.0107924		AT4G38100	410.741	0.310505	0.0940542	3.30134	0.000962251	0.00794114
AT4G38810	AT4G38810	1757.46	0.715777	0.0942874	-7.59144	3.1637e-14	2.05476e-12		AT4G38810	806.097	0.470352	0.0855028	5.50101	3.77612e-08	1.05762e-06
AT4G39330	AT4G39330	5352.88	1.32583	0.165897	-7.99189	1.32886e-15	1.11585e-13		AT4G39330	3119.06	0.69351	0.115808	5.98846	2.11839e-09	7.59775e-08
AT4G39730	AT4G39730	3850.79	0.918154	0.161987	-5.66806	1.4442e-08	3.19907e-07		AT4G39730	1409.29	0.898825	0.11584	7.75922	8.54523e-15	6.54653e-13
AT4G39800	AT4G39800	8370.83	0.481975	0.159289	-3.02579	0.00247985	0.0118046		AT4G39800	4477.77	0.649147	0.124744	5.20385	1.95197e-07	4.66458e-06
AT5G01260	AT5G01260	577.817	0.646686	0.131437	-4.92013	8.64862e-07	1.22232e-05		AT5G01260	232.094	0.38081	0.122538	3.10768	0.00188563	0.0136956
AT5G01410	AT5G01410	10235.2	0.877281	0.136578	-6.42329	1.33362e-10	4.64659e-09		AT5G01410	3550.51	0.273179	0.104952	2.6029	0.00924393	0.0493783
AT5G01790	AT5G01790	467.908	0.42467	0.151501	-2.80308	0.00506178	0.0212254		AT5G01790	150.21	0.684758	0.174003	3.93532	8.30862e-05	0.00100777
AT5G02480	AT5G02480	2436.2	0.340189	0.105019	-3.2393	0.00119824	0.00644533		AT5G02480	2100.11	0.824902	0.0638537	12.9186	3.53404e-38	1.99033e-35
AT5G02830	AT5G02830	2323.26	0.686287	0.0923053	-7.43497	1.04594e-13	6.11984e-12		AT5G02830	866.437	0.54003	0.0905896	5.96128	2.50274e-09	8.8845e-08
AT5G03190	AT5G03190	553.135	0.722605	0.150935	-4.78753	1.68847e-06	2.20899e-05		AT5G03190	246.274	0.428122	0.13224	3.23745	0.00120603	0.00955565
AT5G03395	AT5G03395	257.335	1.09352	0.202826	-5.39139	6.99133e-08	1.30885e-06		AT5G03395	31.9464	0.861702	0.299293	2.87912	0.00398786	0.0252197
AT5G03880	AT5G03880	5231.65	0.238007	0.0904907	-2.63018	0.008534	0.0325235		AT5G03880	2852.37	0.274503	0.0891456	3.07926	0.00207512	0.0148698
AT5G03900	AT5G03900	1600.64	0.474423	0.0839364	-5.65218	1.58429e-08	3.45961e-07		AT5G03900	1316.22	0.178579	0.065405	2.73035	0.00632665	0.0364764
AT5G04140	AT5G04140	60094.2	0.284044	0.104141	-2.7275	0.0063816	0.0256196		AT5G04140	28771.3	0.332078	0.0867497	3.828	0.00012919	0.00147426
AT5G04440	AT5G04440	1636.45	0.364968	0.0968193	-3.76958	0.000163524	0.00118604		AT5G04440	844.364	0.211848	0.0758489	2.79303	0.00522164	0.0311416
AT5G04940	AT5G04940	367.065	0.495904	0.0901308	-5.50205	3.75396e-08	7.51878e-07		AT5G04940	356.802	0.307049	0.10087	3.04402	0.00233443	0.0163512
AT5G05270	AT5G05270	269.989	1.24652	0.263767	-4.72584	2.29161e-06	2.86366e-05		AT5G05270	472.554	0.555605	0.192317	2.88901	0.0038646	0.0244923
AT5G05740	AT5G05740	2080.48	0.218913	0.0790354	-2.7698	0.00560899	0.0230292		AT5G05740	2246.29	0.219948	0.0721022	3.05051	0.00228457	0.0160722
AT5G06060	AT5G06060	1368.41	0.620346	0.0856617	-7.24181	4.4274e-13	2.37576e-11		AT5G06060	1010.33	0.364159	0.0774203	4.70367	2.5553e-06	4.74998e-05
AT5G06220	AT5G06220	3064.73	1.01417	0.109319	-9.27722	1.73955e-20	3.26272e-18		AT5G06220	1519.48	0.312531	0.0802681	3.89359	9.87708e-05	0.00117409
AT5G08050	AT5G08050	4739.17	0.363867	0.0968227	-3.75807	0.000171227	0.001233		AT5G08050	3726.39	0.382506	0.0722482	5.29434	1.19448e-07	3.03175e-06
AT5G08415	AT5G08415	599.594	0.372308	0.0896958	-4.15078	3.31344e-05	0.000297262		AT5G08415	662.618	0.341204	0.0735442	4.63944	3.49358e-06	6.24175e-05
AT5G08570	AT5G08570	2191.93	0.371344	0.12884	-2.88221	0.003949	0.0172965		AT5G08570	1305.16	0.507334	0.0723988	7.0075	2.42619e-12	1.34137e-10
AT5G08650	AT5G08650	6182.59	0.288688	0.0853604	-3.38199	0.000719632	0.00419103		AT5G08650	4123.09	0.211546	0.0752248	2.81219	0.00492054	0.0298151
AT5G08690	AT5G08690	4349.03	0.320422	0.13037	-2.4578	0.0139792	0.0482041		AT5G08690	5444.06	0.139202	0.0510318	2.72776	0.00637668	0.0366659
AT5G08710	AT5G08710	371.816	0.613678	0.119414	-5.13908	2.7608e-07	4.48635e-06		AT5G08710	296.434	0.339805	0.0951148	3.57257	0.000353492	0.00349434
AT5G08740	AT5G08740	1290.54	0.587127	0.0794939	-7.38581	1.5153e-13	8.73865e-12		AT5G08740	816.238	0.353318	0.0710797	4.97073	6.67026e-07	1.42413e-05
AT5G09760	AT5G09760	415.303	0.287626	0.112221	-2.56303	0.0103764	0.0381469		AT5G09760	477.294	0.328321	0.0840028	3.90845	9.28897e-05	0.00111071
AT5G10470	AT5G10470	4185.93	0.6181	0.100868	-6.12779	8.91061e-10	2.54377e-08		AT5G10470	1845.12	0.268733	0.0952347	2.8218	0.00477555	0.0291262
AT5G12150	AT5G12150	4871.87	0.541271	0.0952659	-5.68169	1.33372e-08	2.99418e-07		AT5G12150	2846.14	0.289687	0.0534283	5.42197	5.89443e-08	1.58488e-06
AT5G12860	AT5G12860	10492.7	0.446909	0.11607	-3.85034	0.000117954	0.000895997		AT5G12860	7889.56	0.264445	0.0510004	5.18516	2.15834e-07	5.14593e-06
AT5G13370	AT5G13370	614.775	0.626771	0.0826367	-7.58465	3.33377e-14	2.14021e-12		AT5G13370	268.564	1.28992	0.117668	10.9624	5.79488e-28	1.52853e-25
AT5G14640	AT5G14640	665.087	1.43348	0.160905	-8.90885	5.15662e-19	7.723e-17		AT5G14640	584.749	0.534018	0.0929103	5.74768	9.04786e-09	2.90507e-07
AT5G14660	AT5G14660	1385.02	0.218427	0.0803991	-2.71678	0.00659198	0.0263273		AT5G14660	1201.61	0.411285	0.0702899	5.85126	4.87855e-09	1.653e-07
AT5G14740	AT5G14740	57450.6	0.201372	0.0701541	-2.87042	0.00409924	0.0178107		AT5G14740	24422.6	0.332926	0.0790518	4.21149	2.53691e-05	0.000359865
AT5G15450	AT5G15450	6068.68	0.972209	0.129603	-7.50141	6.31337e-14	3.82789e-12		AT5G15450	2013.09	0.660399	0.0830935	7.94766	1.90075e-15	1.57174e-13
AT5G15910	AT5G15910	503.63	0.757761	0.136068	-5.56898	2.56242e-08	5.3401e-07		AT5G15910	421.715	0.275207	0.0981643	2.80353	0.0050546	0.0303948
AT5G15950	AT5G15950	3356.47	0.693373	0.161018	-4.30619	1.66089e-05	0.000164361		AT5G15950	483.351	0.40519	0.129219	3.13568	0.00171458	0.0127238
AT5G15970	AT5G15970	3152.15	1.8816	0.241107	-7.80401	5.99724e-15	4.43565e-13		AT5G15970	1780.04	1.0995	0.282661	3.88983	0.000100313	0.00118972
AT5G16970	AT5G16970	1621.91	0.344665	0.0898186	-3.83734	0.000124375	0.000935111		AT5G16970	1346.42	0.810834	0.0890817	9.10213	8.85751e-20	1.15358e-17
AT5G16980	AT5G16980	146.881	1.03457	0.254139	-4.07088	4.68364e-05	0.000403936		AT5G16980	118.434	1.81321	0.178734	10.1448	3.49644e-24	7.00566e-22
AT5G16990	AT5G16990	818.286	0.559402	0.130427	-4.28902	1.79466e-05	0.000175951		AT5G16990	379.381	0.504831	0.125179	4.03287	5.50994e-05	0.000709179
AT5G17310	AT5G17310	1911.14	0.330946	0.129195	-2.56161	0.010419	0.0382543		AT5G17310	975.249	0.415957	0.12492	3.32978	0.000869144	0.00733842
AT5G17560	AT5G17560	1162.09	0.404872	0.108816	-3.72069	0.000198678	0.00140446		AT5G17560	841.539	0.271744	0.0884882	3.07096	0.00213374	0.0151906
AT5G17780	AT5G17780	105.919	1.32901	0.251605	-5.28214	1.27687e-07	2.25974e-06		AT5G17780	26.3322	1.25986	0.360384	3.49587	0.000472512	0.00444324
AT5G17790	AT5G17790	547.233	0.358789	0.112818	-3.18025	0.00147148	0.00764856		AT5G17790	442.934	0.320952	0.0824867	3.89096	9.98484e-05	0.00118555
AT5G17860	AT5G17860	389.588	0.709496	0.212345	-3.34125	0.000834034	0.00474709		AT5G17860	105.96	3.2909	0.224282	14.6731	9.59156e-49	9.08495e-46
AT5G19220	AT5G19220	1548.37	0.395673	0.129467	-3.05616	0.00224189	0.0108259		AT5G19220	838.034	0.305922	0.11062	2.76552	0.00568316	0.0334158
AT5G19440	AT5G19440	611.293	0.550855	0.147051	-3.74602	0.000179661	0.00128956		AT5G19440	866.305	0.331733	0.0975927	3.39915	0.000675951	0.0059788
AT5G19850	AT5G19850	1257.29	1.09846	0.146523	-7.49688	6.53562e-14	3.93884e-12		AT5G19850	380.002	0.574357	0.131835	4.35663	1.32079e-05	0.000201483
AT5G20070	AT5G20070	1291.47	0.681188	0.0844459	-8.06656	7.23059e-16	6.33671e-14		AT5G20070	966.713	0.262626	0.0790602	3.32185	0.000894224	0.00748949
AT5G20140	AT5G20140	1341.68	0.231042	0.0892428	-2.58891	0.00962805	0.0359222		AT5G20140	882.085	0.281029	0.0943699	2.97795	0.00290181	0.0194681
AT5G20220	AT5G20220	212.009	1.044	0.172013	-6.06928	1.28481e-09	3.52253e-08		AT5G20220	93.8011	0.426901	0.160911	2.65302	0.00797748	0.0439193
AT5G20380	AT5G20380	1729.42	1.18631	0.123257	-9.62464	6.29283e-22	1.50346e-19		AT5G20380	710.098	0.332147	0.0967416	3.43335	0.000596182	0.00539203
AT5G21060	AT5G21060	570.25	0.210953	0.0828144	-2.5473	0.0108559	0.0395045		AT5G21060	580.905	0.211515	0.0814239	2.59769	0.0093852	0.0499282
AT5G23120	AT5G23120	7712.29	0.325267	0.0841082	-3.86724	0.000110074	0.000845114		AT5G23120	5578.55	0.282631	0.076208	3.70868	0.000208344	0.00222983
AT5G23140	AT5G23140	494.23	0.237418	0.0947215	-2.50649	0.0121937	0.0432279		AT5G23140	620.72	0.229942	0.0750451	3.06405	0.00218359	0.015461
AT5G23890	AT5G23890	1935.03	0.420016	0.102444	-4.09997	4.13201e-05	0.000361804		AT5G23890	1934.95	0.251767	0.0509517	4.94129	7.76066e-07	1.62203e-05
AT5G23940	AT5G23940	39.8379	0.859361	0.251184	-3.42124	0.000623355	0.00372103		AT5G23940	1764.88	0.346029	0.101603	3.4057	0.000659946	0.00586687
AT5G24300	AT5G24300	5101.08	0.24794	0.0880119	-2.81712	0.00484562	0.0204343		AT5G24300	3510.12	0.275192	0.0635621	4.3295	1.49451e-05	0.000225508
AT5G25220	AT5G25220	1191.32	0.431925	0.118946	-3.63127	0.000282031	0.00189554		AT5G25220	788.235	0.261996	0.0830097	3.15621	0.00159834	0.0120587
AT5G25360	AT5G25360	574.974	0.427082	0.110027	-3.88162	0.000103764	0.000804032		AT5G25360	471.915	0.242503	0.0772908	3.13754	0.00170371	0.0126521
AT5G26200	AT5G26200	159.71	0.311899	0.127596	-2.44443	0.0145082	0.0496868		AT5G26200	113.095	1.17535	0.159977	7.34702	2.02674e-13	1.2955e-11
AT5G28030	AT5G28030	772.01	1.74237	0.232651	-7.48919	6.92981e-14	4.15148e-12		AT5G28030	115.449	0.479863	0.172235	2.7861	0.00533464	0.0316705
AT5G33320	AT5G33320	2364.67	0.300437	0.0766171	-3.92127	8.80827e-05	0.000696906		AT5G33320	2327.59	0.172196	0.053441	3.22217	0.00127224	0.0099928
AT5G35180	AT5G35180	1901.8	0.625496	0.109102	-5.73314	9.8588e-09	2.26639e-07		AT5G35180	1449.54	0.526912	0.0651644	8.0859	6.1709e-16	5.51885e-14
AT5G37360	AT5G37360	4440.96	0.461691	0.114983	-4.01531	5.93683e-05	0.000494793		AT5G37360	1804.82	0.266918	0.0839418	3.1798	0.00147376	0.0112947
AT5G38520	AT5G38520	4886.15	0.684159	0.124784	-5.48276	4.18743e-08	8.3041e-07		AT5G38520	2562.36	0.437029	0.0998582	4.3765	1.20602e-05	0.000185332
AT5G39040	AT5G39040	721.081	0.472192	0.094284	-5.00819	5.4944e-07	8.1983e-06		AT5G39040	595.636	0.253854	0.0760413	3.33837	0.000842714	0.00716462
AT5G39590	AT5G39590	1216.85	0.361111	0.130988	-2.75684	0.00583637	0.0238021		AT5G39590	1140.39	0.468685	0.0793002	5.91026	3.41573e-09	1.18826e-07
AT5G40800	AT5G40800	27.4305	2.35461	0.376791	-6.2491	4.12831e-10	1.26877e-08		AT5G40800	13.4998	2.05726	0.572401	3.59408	0.000325535	0.00326916
AT5G41480	AT5G41480	247.13	0.3447	0.115934	-2.97325	0.0029466	0.0136225		AT5G41480	244.115	0.271636	0.104576	2.59748	0.00939094	0.049946
AT5G42070	AT5G42070	1177.28	0.340153	0.0992922	-3.42577	0.000613048	0.00367043		AT5G42070	825.045	0.283024	0.0994267	2.84656	0.00441946	0.0274167
AT5G42270	AT5G42270	22075.5	0.888551	0.0991426	-8.96236	3.17816e-19	4.94438e-17		AT5G42270	11986.2	0.335343	0.0758474	4.42129	9.81134e-06	0.000154728
AT5G42310	AT5G42310	2043.25	0.716461	0.100321	-7.1417	9.2184e-13	4.67182e-11		AT5G42310	988.14	0.254093	0.0833715	3.04771	0.00230589	0.0161957
AT5G42390	AT5G42390	8578.53	0.429589	0.085203	-5.04195	4.60811e-07	7.02204e-06		AT5G42390	5313.65	0.247966	0.0677889	3.65791	0.000254278	0.00265331
AT5G42480	AT5G42480	951.581	0.299952	0.0781305	-3.83912	0.000123476	0.000929151		AT5G42480	830.136	0.259346	0.0811702	3.19509	0.00139789	0.0108367
AT5G42740	AT5G42740	1693.47	0.291137	0.104	-2.79939	0.00511991	0.0214468		AT5G42740	1306.18	0.39807	0.0606043	6.56835	5.08754e-11	2.34545e-09
AT5G43150	AT5G43150	1527.26	0.542034	0.180935	-2.99574	0.00273779	0.0128136		AT5G43150	503.738	0.460614	0.13604	3.38587	0.000709534	0.00623325
AT5G45170	AT5G45170	1547.76	0.278285	0.106854	-2.60434	0.00920503	0.034588		AT5G45170	993.737	0.226734	0.072047	3.14703	0.00164937	0.0123454
AT5G45300	AT5G45300	433.022	0.425113	0.111427	-3.81516	0.000136095	0.0010101		AT5G45300	335.491	0.294074	0.100161	2.93601	0.00332461	0.0217582
AT5G46570	AT5G46570	421.453	0.350617	0.124359	-2.81939	0.00481156	0.0203205		AT5G46570	349.865	0.270652	0.0896812	3.01793	0.00254509	0.0175553
AT5G46800	AT5G46800	3295.86	0.90579	0.127066	-7.12852	1.01452e-12	5.09012e-11		AT5G46800	1833.87	0.338567	0.116681	2.90164	0.00371216	0.023742
AT5G47110	AT5G47110	5663.34	0.319293	0.0761784	-4.19139	2.77256e-05	0.000255828		AT5G47110	4264.4	0.163371	0.0621057	2.63054	0.00852504	0.0462443
AT5G47560	AT5G47560	3456.27	0.778501	0.173108	-4.49721	6.88517e-06	7.57761e-05		AT5G47560	2285.6	0.571802	0.120278	4.75402	1.99416e-06	3.82095e-05
AT5G48880	AT5G48880	2008.65	0.601641	0.136706	-4.40098	1.07765e-05	0.000111943		AT5G48880	878.922	0.412855	0.0897143	4.60188	4.18688e-06	7.27659e-05
AT5G50100	AT5G50100	1359.47	0.958033	0.141926	-6.75024	1.47599e-11	5.98417e-10		AT5G50100	509.515	0.37413	0.116652	3.20723	0.00134019	0.0104478
AT5G50340	AT5G50340	346.474	0.453772	0.112925	-4.01836	5.86045e-05	0.000489037		AT5G50340	318.15	0.381502	0.108136	3.528	0.000418713	0.00403381
AT5G50350	AT5G50350	140.032	0.441266	0.147267	-2.99636	0.00273222	0.0127935		AT5G50350	262.47	0.280609	0.0991091	2.83132	0.00463567	0.0284698
AT5G50850	AT5G50850	2650.68	0.327081	0.079518	-4.1133	3.90041e-05	0.000344228		AT5G50850	2649.36	0.183979	0.0593024	3.10238	0.00191969	0.0138946
AT5G52050	AT5G52050	38.4862	1.05431	0.272912	-3.86319	0.000111917	0.000856011		AT5G52050	54.0073	1.1071	0.271272	4.08116	4.48114e-05	0.000590626
AT5G52310	AT5G52310	6453.54	2.98886	0.321315	-9.30196	1.37875e-20	2.63525e-18		AT5G52310	662.512	1.29053	0.165137	7.81487	5.50195e-15	4.34279e-13
AT5G52920	AT5G52920	2658.68	0.36224	0.124603	-2.90715	0.00364742	0.0161697		AT5G52920	3880.85	0.222473	0.0626709	3.54986	0.000385441	0.00376022
AT5G53050	AT5G53050	624.462	0.327629	0.0929549	-3.5246	0.000424124	0.00268679		AT5G53050	294.21	0.376851	0.102972	3.65974	0.000252467	0.00263675
AT5G53120	AT5G53120	1547.75	1.0169	0.176531	-5.76044	8.38931e-09	1.95093e-07		AT5G53120	526.308	0.446582	0.0929947	4.80223	1.56911e-06	3.07882e-05
AT5G53580	AT5G53580	1804.7	0.245454	0.0800655	-3.06566	0.00217187	0.0105589		AT5G53580	999.273	0.352302	0.101698	3.46421	0.000531792	0.00490548
AT5G53970	AT5G53970	902.153	0.759507	0.162696	-4.66827	3.03744e-06	3.69445e-05		AT5G53970	515.945	0.408491	0.117228	3.48459	0.00049289	0.00459623
AT5G54470	AT5G54470	204.089	0.965431	0.141079	-6.8432	7.74426e-12	3.28583e-10		AT5G54470	87.8283	0.616072	0.183809	3.3517	0.000803166	0.00687326
AT5G55070	AT5G55070	1344.39	0.345667	0.0847148	-4.08035	4.4967e-05	0.000389656		AT5G55070	1161.96	0.282749	0.0729079	3.87817	0.000105246	0.00124115
AT5G56210	AT5G56210	446.968	0.365459	0.146205	-2.49963	0.0124323	0.0438805		AT5G56210	355.814	0.334397	0.107593	3.10798	0.00188374	0.0136914
AT5G57030	AT5G57030	3286.07	0.362157	0.0880948	-4.11099	3.93966e-05	0.00034712		AT5G57030	1942.53	0.240155	0.0679425	3.53469	0.000408258	0.00395164
AT5G57050	AT5G57050	473.368	1.34097	0.179178	-7.48397	7.21114e-14	4.30715e-12		AT5G57050	207.757	0.496226	0.149098	3.32818	0.000874163	0.00736001
AT5G57330	AT5G57330	1512.91	0.423284	0.118991	-3.55727	0.000374728	0.00241382		AT5G57330	1090.11	0.256425	0.0647247	3.96178	7.43925e-05	0.00091673
AT5G57930	AT5G57930	3817.5	0.265834	0.0820131	-3.24136	0.00118962	0.00640583		AT5G57930	1987.02	0.258842	0.0675689	3.83079	0.000127734	0.00145928
AT5G57960	AT5G57960	1046.86	0.539228	0.089667	-6.01368	1.81363e-09	4.84013e-08		AT5G57960	653.087	0.24552	0.0903155	2.71847	0.0065585	0.0374736
AT5G59130	AT5G59130	3748.84	1.23524	0.144985	-8.51977	1.59869e-17	1.85457e-15		AT5G59130	578.71	0.469543	0.150988	3.10981	0.0018721	0.0136259
AT5G59220	AT5G59220	51.1778	2.1686	0.325319	-6.66608	2.62732e-11	1.01791e-09		AT5G59220	90.8412	1.91632	0.2593	7.39035	1.46441e-13	9.44747e-12
AT5G59310	AT5G59310	19.6612	1.32619	0.379352	-3.49593	0.000472417	0.00293164		AT5G59310	31.9556	3.36933	0.539482	6.24549	4.22465e-10	1.71605e-08
AT5G59320	AT5G59320	441.696	1.13014	0.35724	-3.16353	0.0015587	0.00802504		AT5G59320	69.5644	1.75522	0.313844	5.59265	2.23633e-08	6.54502e-07
AT5G59350	AT5G59350	363.397	0.799627	0.114115	-7.00721	2.43122e-12	1.15896e-10		AT5G59350	232.213	0.427048	0.130016	3.28458	0.00102135	0.00834949
AT5G59480	AT5G59480	674.262	1.08914	0.108633	-10.0259	1.1731e-23	3.62199e-21		AT5G59480	393.157	0.651214	0.0889556	7.32066	2.46753e-13	1.55814e-11
AT5G60680	AT5G60680	652.208	0.434028	0.157383	-2.75779	0.00581937	0.0237521		AT5G60680	839.459	0.507212	0.102095	4.96803	6.76377e-07	1.43967e-05
AT5G61820	AT5G61820	1750.56	1.43006	0.198084	-7.21947	5.21911e-13	2.77096e-11		AT5G61820	763.5	1.37005	0.162146	8.44946	2.9265e-17	3.09555e-15
AT5G61960	AT5G61960	1800.05	0.30458	0.0612604	-4.97189	6.63032e-07	9.68441e-06		AT5G61960	1354.93	0.223931	0.0655049	3.41853	0.000629592	0.00564277
AT5G63100	AT5G63100	232.812	0.559825	0.132049	-4.23954	2.2398e-05	0.000213877		AT5G63100	184.814	0.382984	0.118157	3.2413	0.00118985	0.00945255
AT5G63780	AT5G63780	2003.42	0.376655	0.133064	-2.83062	0.00464575	0.0197575		AT5G63780	669.534	0.293261	0.0983282	2.98247	0.00285933	0.0192762
AT5G63790	AT5G63790	466.76	0.896796	0.128853	-6.95982	3.40705e-12	1.5611e-10		AT5G63790	430.451	0.622944	0.134037	4.64755	3.35908e-06	6.02898e-05
AT5G64050	AT5G64050	1433.37	0.452963	0.0754246	-6.0055	1.90741e-09	5.07017e-08		AT5G64050	1899.97	0.243145	0.0696628	3.49031	0.000482469	0.00452258
AT5G64170	AT5G64170	3836.68	0.445334	0.11522	-3.86508	0.000111052	0.000850779		AT5G64170	1576.28	0.314295	0.0879791	3.57238	0.000353748	0.00349509
AT5G64460	AT5G64460	1628.43	0.200545	0.0768251	-2.61042	0.00904324	0.034076		AT5G64460	1197.64	0.323885	0.0932163	3.47455	0.00051171	0.00474895
AT5G65460	AT5G65460	853.136	0.368122	0.107941	-3.4104	0.000648682	0.00385274		AT5G65460	760.612	0.248696	0.0731412	3.40021	0.00067333	0.00596296
AT5G65840	AT5G65840	2500.81	0.453079	0.133417	-3.39596	0.000683873	0.00402364		AT5G65840	886.44	0.414258	0.130821	3.16661	0.00154226	0.0117205
AT5G65990	AT5G65990	685.42	0.872564	0.128604	-6.78489	1.16175e-11	4.7875e-10		AT5G65990	456.95	0.309701	0.102812	3.0123	0.00259272	0.0178307
AT5G66120	AT5G66120	2237.5	0.326493	0.0791438	-4.12532	3.70227e-05	0.000328765		AT5G66120	1646.77	0.20883	0.0667767	3.12728	0.00176432	0.0130097
AT5G66400	AT5G66400	1140.66	1.58506	0.166639	-9.51195	1.87119e-21	4.21943e-19		AT5G66400	256.45	1.0416	0.137469	7.57699	3.53674e-14	2.50676e-12
AT5G66530	AT5G66530	1435.09	0.376774	0.093422	-4.03303	5.50621e-05	0.000464498		AT5G66530	1636.11	0.227117	0.0641311	3.54145	0.000397934	0.00386859
AT5G66720	AT5G66720	979.758	0.303639	0.0736763	-4.12126	3.76802e-05	0.00033357		AT5G66720	929.214	0.34745	0.0748776	4.64023	3.48016e-06	6.23021e-05
AT5G67030	AT5G67030	21325.3	0.613007	0.12636	-4.85127	1.22674e-06	1.659e-05		AT5G67030	9712.66	0.41087	0.09862	4.16619	3.0973e-05	0.000427891

## Sheet: CO-downregulated genes
LC/NC	GeneID	baseMean	log2FoldChange	lfcSE	stat	pvalue	padj		NH4+/GM	baseMean	log2FoldChange	lfcSE	stat	pvalue	padj
AT1G01140	AT1G01140	1274.71	-0.455002	0.144744	3.14349	0.00166945	0.0085079		AT1G01140	1111.7	-0.392521	0.114507	-3.42793	0.000608212	0.00548417
AT1G01190	AT1G01190	203.909	-1.54112	0.312603	4.92996	8.22471e-07	1.16982e-05		AT1G01190	97.6073	-0.656049	0.202866	-3.2339	0.00122112	0.0096568
AT1G01300	AT1G01300	552.003	-0.569888	0.161038	3.53883	0.0004019	0.00256625		AT1G01300	1081.19	-0.489588	0.0730714	-6.70014	2.08226e-11	1.01379e-09
AT1G01430	AT1G01430	1043.54	-0.683067	0.0907144	7.52986	5.07945e-14	3.12698e-12		AT1G01430	1164.99	-0.286609	0.105769	-2.70976	0.00673316	0.0382826
AT1G02300	AT1G02300	299.173	-1.20035	0.211752	5.66869	1.43897e-08	3.19102e-07		AT1G02300	501.222	-0.22989	0.0839836	-2.73732	0.00619412	0.0358536
AT1G02640	AT1G02640	104.737	-0.881209	0.185891	4.74047	2.13227e-06	2.68713e-05		AT1G02640	1215.4	-1.31169	0.114579	-11.4479	2.40841e-30	6.97035e-28
AT1G03090	AT1G03090	454.106	-0.879603	0.263799	3.33437	0.000854923	0.00484236		AT1G03090	1082.17	-0.247145	0.0900599	-2.74423	0.00606522	0.0352638
AT1G03457	AT1G03457	22.9402	-1.18853	0.280451	4.23793	2.25595e-05	0.000214979		AT1G03457	207.603	-0.725433	0.143956	-5.03926	4.67329e-07	1.03943e-05
AT1G03850	AT1G03850	12.753	-1.47534	0.352857	4.18113	2.90067e-05	0.000265937		AT1G03850	127.297	-0.833999	0.23727	-3.51499	0.000439778	0.00418834
AT1G03870	AT1G03870	436.174	-1.52086	0.165986	9.16258	5.0669e-20	8.76618e-18		AT1G03870	2126.85	-1.68756	0.16862	-10.008	1.40498e-23	2.71083e-21
AT1G04040	AT1G04040	95.7307	-1.95641	0.234071	8.35818	6.36936e-17	6.48867e-15		AT1G04040	362.855	-1.11073	0.107128	-10.3682	3.4593e-25	7.13712e-23
AT1G05810	AT1G05810	78.3981	-0.607871	0.183641	3.31011	0.000932593	0.00520618		AT1G05810	168.348	-1.26393	0.136991	-9.22637	2.79952e-20	3.78808e-18
AT1G06160	AT1G06160	19.0305	-1.72821	0.374613	4.61331	3.96298e-06	4.68117e-05		AT1G06160	37.3763	-1.47751	0.332862	-4.4388	9.04634e-06	0.000144561
AT1G06640	AT1G06640	919.471	-1.29594	0.313255	4.13702	3.51851e-05	0.000314354		AT1G06640	1682.85	-0.425792	0.114308	-3.72496	0.000195344	0.00211206
AT1G08300	AT1G08300	82.3289	-1.12363	0.235782	4.76556	1.88332e-06	2.42129e-05		AT1G08300	89.7631	-0.701817	0.170948	-4.10544	4.03541e-05	0.000541119
AT1G08900	AT1G08900	518.99	-0.70424	0.141128	4.99009	6.0351e-07	8.91888e-06		AT1G08900	507.283	-0.387684	0.1018	-3.80828	0.000139936	0.00157707
AT1G08930	AT1G08930	435.727	-1.60688	0.210136	7.64685	2.05961e-14	1.36869e-12		AT1G08930	1800.88	-1.48532	0.127268	-11.6708	1.79784e-31	5.94657e-29
AT1G09070	AT1G09070	1321.8	-0.628762	0.0763857	8.23141	1.85015e-16	1.72701e-14		AT1G09070	2083.32	-0.285301	0.0995409	-2.86617	0.0041547	0.0261006
AT1G09430	AT1G09430	794.29	-0.572834	0.130087	4.40348	1.06528e-05	0.000110888		AT1G09430	1221.5	-0.42838	0.0746556	-5.73808	9.57555e-09	3.051e-07
AT1G09460	AT1G09460	6.82434	-1.13534	0.375628	3.0225	0.00250698	0.0119168		AT1G09460	109.216	-0.525758	0.176762	-2.97438	0.00293581	0.0196519
AT1G09750	AT1G09750	1646.33	-0.542405	0.157861	3.43596	0.000590455	0.00355211		AT1G09750	4260.36	-0.328711	0.108828	-3.02047	0.00252381	0.017449
AT1G10990	AT1G10990	7.81585	-1.9799	0.380316	5.20593	1.9303e-07	3.26637e-06		AT1G10990	48.2723	-1.49577	0.265913	-5.62504	1.85468e-08	5.51323e-07
AT1G11350	AT1G11350	515.776	-1.09515	0.131555	8.32466	8.45725e-17	8.36101e-15		AT1G11350	738.317	-0.594468	0.0914691	-6.49912	8.07911e-11	3.60844e-09
AT1G11360	AT1G11360	300.395	-0.424392	0.12728	3.33431	0.000855116	0.00484236		AT1G11360	543.146	-0.424847	0.0755665	-5.62216	1.88587e-08	5.59e-07
AT1G11380	AT1G11380	81.9231	-0.584317	0.167326	3.49209	0.000479259	0.00296859		AT1G11380	251.999	-0.806578	0.134008	-6.01888	1.75631e-09	6.43198e-08
AT1G12220	AT1G12220	254.275	-0.450653	0.122979	3.66448	0.00024784	0.00169758		AT1G12220	174.923	-0.392706	0.138291	-2.83972	0.00451538	0.0278835
AT1G12320	AT1G12320	98.9773	-0.567542	0.210371	2.69781	0.00697967	0.0275901		AT1G12320	133.3	-0.88732	0.144581	-6.13718	8.40005e-10	3.29023e-08
AT1G12430	AT1G12430	297.48	-0.562722	0.112457	5.00389	5.61848e-07	8.36449e-06		AT1G12430	582.812	-0.339784	0.0878688	-3.86694	0.000110208	0.00129091
AT1G13110	AT1G13110	1518.49	-0.952234	0.145768	6.53255	6.46592e-11	2.37229e-09		AT1G13110	1596.87	-0.551003	0.138985	-3.96448	7.35558e-05	0.000908569
AT1G13640	AT1G13640	423.497	-0.391106	0.109434	3.5739	0.000351705	0.002285		AT1G13640	663.405	-0.322357	0.0833452	-3.86774	0.000109851	0.00128816
AT1G14210	AT1G14210	158.944	-0.969399	0.164322	5.89938	3.64874e-09	9.06269e-08		AT1G14210	365.984	-0.671346	0.119702	-5.60848	2.04114e-08	6.02453e-07
AT1G14280	AT1G14280	1116.53	-0.514595	0.0872027	5.90114	3.61006e-09	8.98886e-08		AT1G14280	1144.1	-0.481915	0.123072	-3.91573	9.01301e-05	0.00108063
AT1G14290	AT1G14290	339.096	-0.384838	0.135164	2.84719	0.00441068	0.0189465		AT1G14290	608.702	-0.457314	0.0871396	-5.24806	1.53708e-07	3.78726e-06
AT1G14380	AT1G14380	318.235	-0.439709	0.141039	3.11765	0.00182299	0.0091418		AT1G14380	510.006	-0.277463	0.0924354	-3.0017	0.0026848	0.0183249
AT1G14430	AT1G14430	18.8128	-0.968548	0.364281	2.65879	0.00784218	0.0303714		AT1G14430	196.523	-0.814356	0.165495	-4.92074	8.6216e-07	1.77878e-05
AT1G15125	AT1G15125	135.372	-1.5821	0.371546	4.25815	2.06128e-05	0.000199075		AT1G15125	534.596	-3.36336	0.357995	-9.395	5.72196e-21	8.28015e-19
AT1G15175	AT1G15175	85.97	-1.14031	0.210926	5.40621	6.43712e-08	1.21416e-06		AT1G15175	105.653	-0.611201	0.209172	-2.922	0.00347793	0.0225633
AT1G15400	AT1G15400	357.919	-0.625403	0.136235	4.59061	4.41947e-06	5.1417e-05		AT1G15400	474.871	-0.297012	0.0890896	-3.33385	0.000856515	0.00725531
AT1G15670	AT1G15670	17.4095	-0.955459	0.363799	2.62633	0.00863099	0.0328034		AT1G15670	192.011	-1.23569	0.143942	-8.58459	9.11625e-18	9.99813e-16
AT1G15830	AT1G15830	581.885	-0.622692	0.12176	5.11408	3.15267e-07	5.04835e-06		AT1G15830	649.642	-0.654994	0.0931636	-7.03058	2.0567e-12	1.14592e-10
AT1G16390	AT1G16390	44.7852	-1.16733	0.344026	3.39315	0.000690935	0.00405122		AT1G16390	254.514	-1.04496	0.1262	-8.28023	1.22938e-16	1.2199e-14
AT1G18210	AT1G18210	189.593	-0.317126	0.127947	2.47856	0.0131913	0.0459932		AT1G18210	579.394	-0.484883	0.11546	-4.19956	2.67432e-05	0.000375522
AT1G18570	AT1G18570	81.6222	-0.658056	0.228952	2.87421	0.00405037	0.017648		AT1G18570	147.689	-0.544547	0.180098	-3.02361	0.00249777	0.0173059
AT1G18640	AT1G18640	277.331	-0.312483	0.107673	2.90216	0.00370605	0.0163861		AT1G18640	572.395	-0.705488	0.0835043	-8.44852	2.95013e-17	3.10478e-15
AT1G18740	AT1G18740	308.491	-0.320982	0.1216	2.63965	0.00829917	0.0318037		AT1G18740	473.447	-0.522531	0.145528	-3.59059	0.000329925	0.00330528
AT1G19360	AT1G19360	180.343	-0.414893	0.122719	3.38085	0.000722616	0.00420571		AT1G19360	230.198	-0.380039	0.10949	-3.47099	0.000518549	0.00480032
AT1G19510	AT1G19510	36.6605	-1.00765	0.326426	3.08692	0.00202244	0.00994326		AT1G19510	46.4799	-1.13364	0.27395	-4.13812	3.50171e-05	0.000478482
AT1G19770	AT1G19770	731.02	-0.533967	0.12348	4.32432	1.53006e-05	0.000153304		AT1G19770	835.78	-0.872187	0.112614	-7.74496	9.56114e-15	7.27136e-13
AT1G20010	AT1G20010	1808.49	-0.643256	0.142929	4.50052	6.77867e-06	7.47479e-05		AT1G20010	3427.67	-0.447532	0.0813692	-5.50001	3.79764e-08	1.06222e-06
AT1G20620	AT1G20620	27446.4	-1.66175	0.198834	8.35748	6.40706e-17	6.49411e-15		AT1G20620	38679.8	-0.290658	0.0575636	-5.04934	4.4334e-07	9.93368e-06
AT1G21270	AT1G21270	1466.88	-1.03332	0.193077	5.35183	8.7071e-08	1.60314e-06		AT1G21270	961.148	-0.839581	0.122285	-6.86577	6.61325e-12	3.42803e-10
AT1G21920	AT1G21920	689.069	-0.603699	0.223259	2.70403	0.00685037	0.0271969		AT1G21920	941.269	-0.448542	0.100429	-4.46627	7.95958e-06	0.000129075
AT1G22330	AT1G22330	91.2674	-1.60112	0.327787	4.88465	1.03615e-06	1.42889e-05		AT1G22330	528.594	-0.697975	0.188393	-3.70489	0.000211479	0.0022599
AT1G22400	AT1G22400	56.3433	-0.878593	0.24781	3.54542	0.000391982	0.00250771		AT1G22400	453.163	-1.49029	0.188688	-7.89816	2.83041e-15	2.31295e-13
AT1G22530	AT1G22530	120.118	-1.19533	0.229871	5.20001	1.99278e-07	3.35795e-06		AT1G22530	2245.58	-1.76404	0.320231	-5.50864	3.6162e-08	1.01693e-06
AT1G22550	AT1G22550	45.579	-1.26874	0.271823	4.66752	3.04854e-06	3.70122e-05		AT1G22550	289.314	-0.408921	0.107682	-3.79749	0.000146167	0.00163754
AT1G23020	AT1G23020	399.645	-1.08306	0.346901	3.12209	0.00179573	0.00904128		AT1G23020	621.749	-0.928395	0.115829	-8.01524	1.09922e-15	9.38756e-14
AT1G23030	AT1G23030	185.445	-0.486661	0.154079	3.15851	0.00158577	0.00813932		AT1G23030	992.38	-1.42531	0.1785	-7.98491	1.40628e-15	1.1864e-13
AT1G23480	AT1G23480	250.201	-1.38614	0.164663	8.41803	3.82873e-17	4.15345e-15		AT1G23480	731.013	-0.919895	0.123383	-7.45563	8.94416e-14	6.03166e-12
AT1G25230	AT1G25230	357.1	-1.89445	0.341955	5.54006	3.02373e-08	6.19849e-07		AT1G25230	852.188	-0.336166	0.102916	-3.26642	0.00108917	0.00879357
AT1G25275	AT1G25275	629.783	-1.23225	0.154426	7.97957	1.46839e-15	1.21773e-13		AT1G25275	2139.76	-0.329784	0.0707274	-4.66275	3.12017e-06	5.63905e-05
AT1G25530	AT1G25530	36.67	-0.878587	0.31125	2.82277	0.00476103	0.0201326		AT1G25530	160.531	-1.00444	0.17786	-5.64738	1.62914e-08	4.90578e-07
AT1G25560	AT1G25560	212.84	-0.61551	0.23386	2.63195	0.00848957	0.0323899		AT1G25560	407.274	-0.397563	0.104078	-3.81985	0.000133533	0.00151391
AT1G26670	AT1G26670	792.861	-0.665054	0.20184	3.29495	0.000984388	0.00543635		AT1G26670	699.564	-0.305476	0.0992245	-3.07863	0.00207954	0.0148912
AT1G26960	AT1G26960	46.5344	-0.865944	0.216167	4.00591	6.17801e-05	0.000513189		AT1G26960	71.5989	-0.647956	0.212717	-3.04609	0.00231841	0.0162499
AT1G27020	AT1G27020	7.16753	-0.965534	0.37289	2.58932	0.00961648	0.035899		AT1G27020	165.5	-2.8379	0.220328	-12.8803	5.80758e-38	3.10303e-35
AT1G28660	AT1G28660	49.1525	-1.48529	0.227451	6.53015	6.57056e-11	2.4019e-09		AT1G28660	211.353	-1.36961	0.14462	-9.47039	2.78809e-21	4.21001e-19
AT1G28670	AT1G28670	507.401	-0.75122	0.124304	6.04343	1.50873e-09	4.09171e-08		AT1G28670	635.964	-0.481482	0.100311	-4.7999	1.58745e-06	3.11187e-05
AT1G29340	AT1G29340	754.183	-0.200104	0.0742465	2.69512	0.00703622	0.027759		AT1G29340	786.934	-0.187853	0.0663521	-2.83115	0.00463808	0.0284762
AT1G29430	AT1G29430	285.902	-0.68493	0.201789	3.39428	0.000688084	0.00404179		AT1G29430	260.361	-0.450104	0.140974	-3.19282	0.00140891	0.010892
AT1G30200	AT1G30200	576.792	-0.282778	0.0935085	3.02409	0.00249383	0.0118655		AT1G30200	739.861	-0.488593	0.0912132	-5.3566	8.48037e-08	2.20067e-06
AT1G30420	AT1G30420	147.385	-0.389826	0.148665	2.62217	0.00873719	0.0331343		AT1G30420	226.417	-0.394647	0.143814	-2.74415	0.00606683	0.0352638
AT1G31540	AT1G31540	1084.21	-0.494906	0.13611	3.63609	0.000276811	0.00186483		AT1G31540	390.107	-0.411115	0.117335	-3.50377	0.000458723	0.00433903
AT1G32170	AT1G32170	28.3293	-0.900859	0.280785	3.20835	0.00133497	0.00704671		AT1G32170	192.797	-0.562609	0.172394	-3.26351	0.00110041	0.00886709
AT1G32190	AT1G32190	31.2319	-0.718591	0.279298	2.57285	0.0100865	0.0372791		AT1G32190	151.956	-0.515445	0.157042	-3.28221	0.00102997	0.00840019
AT1G33080	AT1G33080	152.738	-0.613253	0.19395	3.16191	0.00156739	0.00806357		AT1G33080	157.574	-0.420224	0.154212	-2.72498	0.00643048	0.0368735
AT1G33240	AT1G33240	1642.7	-0.381889	0.079537	4.8014	1.57558e-06	2.08165e-05		AT1G33240	2140.79	-0.456686	0.107778	-4.2373	2.26225e-05	0.000325783
AT1G33770	AT1G33770	66.1235	-1.02802	0.279846	3.67351	0.000239244	0.00164487		AT1G33770	83.1191	-2.49083	0.217195	-11.4682	1.9063e-30	5.59487e-28
AT1G34300	AT1G34300	229.881	-0.44447	0.141795	3.13461	0.00172085	0.00872553		AT1G34300	276.963	-0.362811	0.104061	-3.48653	0.000489324	0.00457038
AT1G36940	AT1G36940	11.4176	-1.05218	0.360236	2.92082	0.00349113	0.0156009		AT1G36940	44.0098	-1.10713	0.277636	-3.98771	6.67144e-05	0.000837972
AT1G44770	AT1G44770	626.862	-0.54232	0.148288	3.65722	0.000254968	0.00173927		AT1G44770	707.704	-0.318134	0.0839598	-3.78913	0.000151179	0.00168915
AT1G47840	AT1G47840	20.3169	-0.984009	0.312586	3.14796	0.00164415	0.00839175		AT1G47840	104.489	-0.763969	0.217028	-3.52013	0.00043133	0.00412485
AT1G49240	AT1G49240	2000.1	-0.418015	0.0927359	4.50759	6.55681e-06	7.24607e-05		AT1G49240	2816.16	-0.207811	0.0697642	-2.97877	0.0028941	0.0194289
AT1G49730	AT1G49730	396.133	-0.955472	0.186835	5.11398	3.15443e-07	5.04835e-06		AT1G49730	960.699	-0.437439	0.107104	-4.08426	4.42176e-05	0.000583908
AT1G50430	AT1G50430	979.127	-0.215688	0.0853679	2.52657	0.0115181	0.0413196		AT1G50430	1331.22	-0.209711	0.0665651	-3.15047	0.00163008	0.0122538
AT1G50460	AT1G50460	440.899	-0.767349	0.221994	3.45663	0.00054698	0.00332345		AT1G50460	524.113	-0.677988	0.131092	-5.17183	2.31807e-07	5.49533e-06
AT1G50590	AT1G50590	27.189	-0.73256	0.276722	2.64727	0.00811439	0.0312568		AT1G50590	57.3699	-0.712536	0.265748	-2.68124	0.00733494	0.0410875
AT1G52200	AT1G52200	20.8621	-1.33444	0.349143	3.82204	0.000132351	0.000985949		AT1G52200	207.434	-1.01123	0.203041	-4.98043	6.3443e-07	1.36318e-05
AT1G52290	AT1G52290	405.925	-0.693105	0.167886	4.12842	3.6526e-05	0.000324674		AT1G52290	397.521	-1.10523	0.10318	-10.7117	8.97174e-27	2.1006e-24
AT1G53390	AT1G53390	533.756	-0.613791	0.110875	5.53588	3.09661e-08	6.34142e-07		AT1G53390	676.256	-0.2243	0.07192	-3.11875	0.00181623	0.0133122
AT1G53440	AT1G53440	357.076	-1.21215	0.186195	6.5101	7.51025e-11	2.73545e-09		AT1G53440	601.445	-0.625094	0.0855513	-7.30666	2.73858e-13	1.70858e-11
AT1G53730	AT1G53730	493.999	-0.302219	0.11361	2.66014	0.00781083	0.0302792		AT1G53730	858.869	-0.919082	0.0879052	-10.4554	1.38444e-25	3.03674e-23
AT1G55200	AT1G55200	41.0746	-1.36361	0.253035	5.38903	7.08408e-08	1.32251e-06		AT1G55200	144.449	-0.565405	0.160035	-3.53302	0.000410848	0.00397459
AT1G55360	AT1G55360	1145.07	-1.01499	0.156902	6.46896	9.86778e-11	3.53636e-09		AT1G55360	1765.82	-0.277019	0.0792841	-3.494	0.000475833	0.00446681
AT1G55380	AT1G55380	15.5994	-1.18801	0.318149	3.73413	0.000188361	0.00134193		AT1G55380	21.7349	-0.90225	0.335508	-2.68921	0.00716217	0.0403148
AT1G56140	AT1G56140	173.934	-0.878182	0.15812	5.55389	2.79373e-08	5.75641e-07		AT1G56140	385.945	-0.57114	0.115068	-4.96352	6.9228e-07	1.47051e-05
AT1G56280	AT1G56280	4836.71	-0.454937	0.123409	3.68642	0.000227429	0.00157443		AT1G56280	4190.01	-0.282014	0.0683688	-4.1249	3.70903e-05	0.000503058
AT1G56340	AT1G56340	1950.21	-0.454778	0.141028	3.22474	0.00126085	0.00672266		AT1G56340	3380.9	-0.222912	0.0655564	-3.4003	0.000673113	0.00596296
AT1G56720	AT1G56720	288.182	-0.563292	0.17508	3.21733	0.00129387	0.0068677		AT1G56720	546.796	-0.407923	0.0942462	-4.32827	1.50283e-05	0.000226598
AT1G57980	AT1G57980	113.271	-0.57022	0.22694	2.51265	0.0119827	0.0426235		AT1G57980	202.654	-1.01486	0.139849	-7.2568	3.96344e-13	2.40787e-11
AT1G57990	AT1G57990	134.612	-1.11895	0.249255	4.4892	7.14926e-06	7.83608e-05		AT1G57990	919.166	-1.83156	0.12154	-15.0695	2.56916e-51	2.81769e-48
AT1G58110	AT1G58110	427.605	-0.345478	0.100658	3.4322	0.000598697	0.00359954		AT1G58110	426.296	-0.31195	0.0992735	-3.14233	0.00167607	0.0125093
AT1G58370	AT1G58370	139.334	-1.06337	0.249955	4.25427	2.09735e-05	0.000201976		AT1G58370	318.366	-1.0255	0.126565	-8.10254	5.38239e-16	4.85534e-14
AT1G59870	AT1G59870	4769.38	-0.503904	0.206193	2.44385	0.0145314	0.0497407		AT1G59870	7348.44	-1.03862	0.126847	-8.18795	2.65716e-16	2.49414e-14
AT1G60060	AT1G60060	21.9654	-1.41083	0.333375	4.23194	2.31683e-05	0.000219634		AT1G60060	70.2717	-1.40709	0.212996	-6.60616	3.94414e-11	1.84278e-09
AT1G61667	AT1G61667	24.8523	-0.825905	0.320103	2.58012	0.00987646	0.0366727		AT1G61667	93.1675	-0.684763	0.203188	-3.37009	0.000751429	0.00653245
AT1G61900	AT1G61900	323.433	-0.698226	0.104117	6.70618	1.99781e-11	7.91496e-10		AT1G61900	674.881	-0.354227	0.0996008	-3.55646	0.000375879	0.00369287
AT1G62790	AT1G62790	117.15	-0.430208	0.161411	2.66529	0.00769211	0.0298998		AT1G62790	602.506	-0.795735	0.10279	-7.74137	9.8352e-15	7.42558e-13
AT1G63260	AT1G63260	110.712	-0.743108	0.23194	3.20388	0.00135587	0.00713077		AT1G63260	359.32	-0.97626	0.134251	-7.27189	3.54489e-13	2.16623e-11
AT1G63300	AT1G63300	83.1032	-0.580322	0.227991	2.54537	0.0109162	0.0396664		AT1G63300	240.604	-0.324035	0.114418	-2.83202	0.00462545	0.0284154
AT1G64170	AT1G64170	20.5774	-1.09955	0.365454	3.00871	0.00262359	0.0123656		AT1G64170	108.458	-0.708639	0.202675	-3.49643	0.000471525	0.00443796
AT1G66930	AT1G66930	2.54778	-0.910971	0.346905	2.62599	0.0086397	0.0328266		AT1G66930	15.032	-1.53502	0.444346	-3.45457	0.000551167	0.0050418
AT1G66940	AT1G66940	199.5	-2.32341	0.260827	8.90786	5.2027e-19	7.73429e-17		AT1G66940	509.445	-0.892905	0.108444	-8.23383	1.81328e-16	1.74125e-14
AT1G67560	AT1G67560	640.145	-0.630074	0.0917161	6.86983	6.42804e-12	2.78027e-10		AT1G67560	761.658	-0.435059	0.0788782	-5.51558	3.4764e-08	9.8026e-07
AT1G68585	AT1G68585	75.9367	-0.906461	0.200043	4.53133	5.8613e-06	6.56563e-05		AT1G68585	93.1784	-0.83503	0.17565	-4.75393	1.995e-06	3.82095e-05
AT1G68600	AT1G68600	575.037	-0.9712	0.145322	6.68307	2.33989e-11	9.15385e-10		AT1G68600	347.341	-1.78478	0.226043	-7.89574	2.88609e-15	2.34923e-13
AT1G68840	AT1G68840	481.216	-1.16712	0.243355	4.79597	1.61886e-06	2.13042e-05		AT1G68840	1235.68	-0.70938	0.166973	-4.24847	2.15234e-05	0.000310599
AT1G69160	AT1G69160	550.458	-0.359221	0.139803	2.56948	0.0101851	0.0375467		AT1G69160	800.242	-0.705509	0.129625	-5.44268	5.2484e-08	1.42962e-06
AT1G70280	AT1G70280	663.121	-0.425563	0.102996	4.13186	3.59842e-05	0.000320394		AT1G70280	799.738	-0.389283	0.0839096	-4.63932	3.4956e-06	6.24175e-05
AT1G70520	AT1G70520	397.576	-0.5538	0.15381	3.60054	0.000317551	0.00209912		AT1G70520	526.785	-0.341627	0.109513	-3.1195	0.00181158	0.0132838
AT1G71400	AT1G71400	15.1532	-1.01133	0.346577	2.91805	0.0035223	0.0157192		AT1G71400	74.222	-0.979624	0.277074	-3.53561	0.000406835	0.00394308
AT1G72150	AT1G72150	4887.99	-0.636996	0.222187	2.86694	0.00414457	0.0179571		AT1G72150	12706.2	-0.677786	0.102899	-6.58689	4.49143e-11	2.08447e-09
AT1G72300	AT1G72300	525.617	-0.366717	0.132017	2.77781	0.00547274	0.0226086		AT1G72300	379.364	-0.417403	0.0891105	-4.68411	2.81185e-06	5.15333e-05
AT1G72416	AT1G72416	77.222	-0.616567	0.195922	3.147	0.00164958	0.00841519		AT1G72416	188.852	-1.72956	0.166126	-10.4111	2.20608e-25	4.59702e-23
AT1G72430	AT1G72430	833.549	-0.704893	0.112361	6.27349	3.53041e-10	1.09678e-08		AT1G72430	911.476	-0.859577	0.17162	-5.00862	5.4823e-07	1.19874e-05
AT1G72450	AT1G72450	1397.36	-0.575042	0.166079	3.46246	0.000535256	0.00326407		AT1G72450	785.535	-0.542419	0.120816	-4.48964	7.13429e-06	0.0001166
AT1G72630	AT1G72630	202.737	-0.476923	0.135896	3.50946	0.000449016	0.00281164		AT1G72630	286.778	-0.502796	0.112302	-4.47718	7.56356e-06	0.000123036
AT1G74740	AT1G74740	71.8545	-0.599972	0.191928	3.12602	0.00177188	0.00893912		AT1G74740	201.899	-0.403558	0.143522	-2.81183	0.00492609	0.0298401
AT1G75220	AT1G75220	959.312	-0.838379	0.125569	6.67665	2.4446e-11	9.52635e-10		AT1G75220	1679.77	-0.65636	0.059219	-11.0836	1.50683e-28	4.07785e-26
AT1G75380	AT1G75380	6109.91	-1.3501	0.240059	5.62403	1.86553e-08	3.99992e-07		AT1G75380	6056.36	-0.720886	0.092302	-7.81009	5.71494e-15	4.49389e-13
AT1G75960	AT1G75960	117.007	-1.74041	0.202694	8.5864	8.97364e-18	1.09812e-15		AT1G75960	284.923	-0.794604	0.118105	-6.72796	1.72063e-11	8.41654e-10
AT1G76890	AT1G76890	327.464	-0.695128	0.118366	5.87271	4.28734e-09	1.0493e-07		AT1G76890	554.693	-0.330003	0.0920488	-3.58509	0.000336963	0.00336003
AT1G77630	AT1G77630	133.24	-0.575751	0.225876	2.54897	0.0108042	0.039359		AT1G77630	280.062	-0.353321	0.123783	-2.85437	0.0043122	0.0268954
AT1G78240	AT1G78240	686.427	-0.420123	0.121714	3.45172	0.000557016	0.00337421		AT1G78240	1072.6	-0.272761	0.0784377	-3.47742	0.000506257	0.00470745
AT1G78260	AT1G78260	15.6493	-1.56762	0.362733	4.3217	1.54828e-05	0.000155052		AT1G78260	211.878	-0.454165	0.137611	-3.30035	0.000965658	0.00796611
AT1G78830	AT1G78830	1088.86	-0.837667	0.188221	4.45043	8.5697e-06	9.12389e-05		AT1G78830	2476.84	-1.11078	0.089675	-12.3868	3.08201e-35	1.23505e-32
AT1G79380	AT1G79380	1060.64	-0.409229	0.0968966	4.22336	2.40689e-05	0.000226791		AT1G79380	1006.9	-0.332075	0.0620384	-5.35273	8.6638e-08	2.24269e-06
AT2G01340	AT2G01340	45.7464	-1.20348	0.302521	3.97818	6.94435e-05	0.000567221		AT2G01340	109.179	-0.578853	0.17654	-3.27888	0.0010422	0.00847858
AT2G01420	AT2G01420	1103.89	-0.998289	0.154083	6.47891	9.239e-11	3.32289e-09		AT2G01420	2213.52	-0.299448	0.0712132	-4.20495	2.61145e-05	0.000368931
AT2G02020	AT2G02020	317.553	-1.05367	0.12732	8.27575	1.27654e-16	1.23763e-14		AT2G02020	191.253	-0.725663	0.126102	-5.75459	8.68532e-09	2.80162e-07
AT2G03530	AT2G03530	519.459	-0.763572	0.193253	3.95116	7.77742e-05	0.00062509		AT2G03530	377.053	-0.872039	0.0932322	-9.35341	8.48699e-21	1.19495e-18
AT2G03980	AT2G03980	557.207	-0.579261	0.208818	2.774	0.00553711	0.0227947		AT2G03980	294.816	-0.300169	0.112759	-2.66204	0.0077669	0.0430673
AT2G06925	AT2G06925	143.04	-0.64114	0.239017	2.6824	0.00730956	0.0286683		AT2G06925	569.113	-0.684873	0.11106	-6.1667	6.97293e-10	2.76766e-08
AT2G14900	AT2G14900	33.3326	-1.35762	0.310909	4.3666	1.26198e-05	0.000128823		AT2G14900	161.272	-0.550619	0.1302	-4.22903	2.34702e-05	0.000336826
AT2G15790	AT2G15790	186.735	-0.476622	0.145517	3.27538	0.00105522	0.00576877		AT2G15790	225.924	-0.732184	0.150944	-4.85072	1.23017e-06	2.47914e-05
AT2G15880	AT2G15880	123.923	-1.54743	0.370935	4.17171	3.02322e-05	0.000275411		AT2G15880	927.972	-0.517724	0.141628	-3.65551	0.000256668	0.00267191
AT2G16060	AT2G16060	14.4565	-0.90845	0.364039	2.49547	0.0125789	0.0443043		AT2G16060	55.0557	-0.8816	0.267917	-3.29057	0.000999834	0.0082058
AT2G16280	AT2G16280	1000.04	-0.269942	0.0859412	3.14101	0.00168367	0.00856949		AT2G16280	1915.79	-0.710449	0.0862708	-8.23511	1.79392e-16	1.73064e-14
AT2G16380	AT2G16380	367.014	-1.16929	0.15524	7.53216	4.99088e-14	3.08191e-12		AT2G16380	385.646	-0.928214	0.126853	-7.31722	2.53158e-13	1.58418e-11
AT2G16650	AT2G16650	85.4939	-0.610988	0.244599	2.49792	0.0124926	0.0440525		AT2G16650	173.098	-0.605467	0.124968	-4.84496	1.26638e-06	2.54472e-05
AT2G17550	AT2G17550	129.648	-1.0582	0.196158	5.39461	6.86739e-08	1.28805e-06		AT2G17550	299.083	-0.502645	0.134388	-3.74025	0.000183834	0.00200247
AT2G17705	AT2G17705	78.5367	-1.13141	0.183899	6.15234	7.63478e-10	2.21458e-08		AT2G17705	118.182	-0.648668	0.151053	-4.29432	1.75231e-05	0.000259706
AT2G17710	AT2G17710	51.1359	-0.592955	0.224775	2.63799	0.00833996	0.0319295		AT2G17710	208.574	-1.38796	0.153706	-9.02999	1.71694e-19	2.14237e-17
AT2G18300	AT2G18300	1792.06	-0.634039	0.186377	3.40192	0.000669154	0.00395443		AT2G18300	2402.68	-0.577909	0.105107	-5.49829	3.83487e-08	1.07119e-06
AT2G18328	AT2G18328	603.86	-0.542442	0.166726	3.25349	0.00113996	0.00616819		AT2G18328	414.489	-1.19735	0.13033	-9.18708	4.03655e-20	5.35755e-18
AT2G18440	AT2G18440	2246.1	-0.732424	0.0829497	8.82974	1.04922e-18	1.49339e-16		AT2G18440	2523.68	-0.175388	0.0604874	-2.89958	0.00373663	0.0238464
AT2G18910	AT2G18910	260.36	-0.356966	0.117924	3.02709	0.00246922	0.0117624		AT2G18910	388.198	-0.649008	0.111898	-5.80001	6.63096e-09	2.17943e-07
AT2G21220	AT2G21220	2.53351	-0.90112	0.331865	2.71532	0.00662114	0.0264332		AT2G21220	13.7802	-1.58526	0.539412	-2.93887	0.0032941	0.0215925
AT2G21650	AT2G21650	287.374	-1.60389	0.291098	5.5098	3.59246e-08	7.22416e-07		AT2G21650	350.793	-2.43417	0.161752	-15.0488	3.51637e-51	3.66371e-48
AT2G22810	AT2G22810	41.8558	-1.43354	0.375581	3.81686	0.000135159	0.00100389		AT2G22810	38.7245	-1.22166	0.357807	-3.41429	0.000639481	0.00571355
AT2G22860	AT2G22860	13.0008	-1.06183	0.37124	2.86022	0.00423343	0.0183026		AT2G22860	18.666	-1.4657	0.447042	-3.27866	0.001043	0.00847858
AT2G23690	AT2G23690	16.5798	-1.14552	0.321967	3.55788	0.000373859	0.00241021		AT2G23690	68.4307	-1.05582	0.325215	-3.24651	0.00116827	0.00932024
AT2G23790	AT2G23790	308.915	-0.766097	0.188954	4.0544	5.02636e-05	0.000429068		AT2G23790	524.303	-0.294529	0.101504	-2.90166	0.00371193	0.023742
AT2G26110	AT2G26110	336.721	-0.653956	0.135246	4.83532	1.32934e-06	1.78452e-05		AT2G26110	470.203	-0.378344	0.120069	-3.15105	0.00162686	0.012234
AT2G26975	AT2G26975	574.346	-0.33178	0.0896669	3.70014	0.000215483	0.00150366		AT2G26975	457.244	-0.26888	0.0961481	-2.79652	0.00516569	0.0309079
AT2G30010	AT2G30010	224.105	-2.5503	0.270689	9.42154	4.44513e-21	9.01105e-19		AT2G30010	1354.2	-1.18297	0.0781068	-15.1456	8.10419e-52	9.38195e-49
AT2G30600	AT2G30600	1237.21	-1.05866	0.256725	4.12369	3.72844e-05	0.000330504		AT2G30600	3948.9	-1.06964	0.111172	-9.62155	6.48447e-22	1.07241e-19
AT2G30930	AT2G30930	179.608	-1.15705	0.21486	5.38513	7.23928e-08	1.34898e-06		AT2G30930	746.737	-0.783825	0.157382	-4.98039	6.34556e-07	1.36318e-05
AT2G30990	AT2G30990	278.78	-0.887148	0.159375	5.56643	2.60014e-08	5.4131e-07		AT2G30990	384.759	-0.786627	0.0974352	-8.07333	6.84071e-16	6.06582e-14
AT2G31090	AT2G31090	80.2251	-0.47324	0.169793	2.78715	0.00531733	0.0220985		AT2G31090	179.389	-0.673325	0.119903	-5.61559	1.95898e-08	5.79848e-07
AT2G31110	AT2G31110	161.366	-0.981251	0.170288	5.7623	8.29776e-09	1.93272e-07		AT2G31110	294.045	-1.32164	0.108043	-12.2325	2.08383e-34	8.04128e-32
AT2G31730	AT2G31730	27.2673	-1.32481	0.295319	4.48604	7.25586e-06	7.93558e-05		AT2G31730	127.498	-1.13026	0.187839	-6.01715	1.77511e-09	6.48943e-08
AT2G31800	AT2G31800	760.559	-0.681434	0.16776	4.06195	4.8664e-05	0.00041701		AT2G31800	1071.71	-0.230919	0.0677978	-3.40599	0.000659238	0.00586308
AT2G31810	AT2G31810	806.871	-0.727871	0.179659	4.0514	5.09123e-05	0.0004335		AT2G31810	2110.54	-0.464044	0.0614923	-7.54637	4.4757e-14	3.11922e-12
AT2G32487	AT2G32487	81.474	-1.44457	0.303616	4.75788	1.95636e-06	2.50416e-05		AT2G32487	54.2956	-0.725656	0.269372	-2.69388	0.00706252	0.0398292
AT2G34010	AT2G34010	66.9423	-0.608726	0.210214	2.89574	0.0037827	0.0166773		AT2G34010	72.4661	-1.14325	0.245715	-4.65274	3.27555e-06	5.89939e-05
AT2G34470	AT2G34470	516.663	-0.562913	0.151591	3.71336	0.000204529	0.00144011		AT2G34470	511.695	-0.385906	0.100592	-3.83634	0.000124883	0.00143141
AT2G34510	AT2G34510	567.248	-0.847015	0.124267	6.81611	9.35381e-12	3.91903e-10		AT2G34510	1552.13	-0.363943	0.137376	-2.64925	0.00806708	0.044249
AT2G34680	AT2G34680	1395.92	-0.349932	0.0924687	3.78434	0.000154119	0.00112678		AT2G34680	2196.31	-0.273389	0.0552369	-4.9494	7.44445e-07	1.56379e-05
AT2G35880	AT2G35880	445.81	-0.646777	0.132431	4.88389	1.04011e-06	1.43267e-05		AT2G35880	1274.09	-0.699875	0.110285	-6.34608	2.20875e-10	9.35484e-09
AT2G36050	AT2G36050	24.9198	-2.05792	0.344239	5.97816	2.25667e-09	5.9279e-08		AT2G36050	217.803	-0.50444	0.187631	-2.68847	0.00717798	0.0403602
AT2G37480	AT2G37480	963.653	-0.342483	0.125422	2.73064	0.00632112	0.0254327		AT2G37480	1281.4	-0.218975	0.0635823	-3.44396	0.000573253	0.00521408
AT2G38310	AT2G38310	327.393	-1.43671	0.149136	9.63355	5.76986e-22	1.42957e-19		AT2G38310	1395.93	-1.81383	0.1093	-16.5949	7.58523e-62	1.29992e-58
AT2G39180	AT2G39180	40.9137	-0.668584	0.227768	2.93537	0.00333146	0.0150516		AT2G39180	124.067	-1.04982	0.173875	-6.03776	1.56268e-09	5.81486e-08
AT2G39210	AT2G39210	283.989	-0.66374	0.213687	3.10613	0.00189553	0.00944659		AT2G39210	160.115	-0.796942	0.182273	-4.37225	1.22972e-05	0.000188696
AT2G39300	AT2G39300	19.0298	-0.826363	0.286385	2.8855	0.0039079	0.0171314		AT2G39300	72.3002	-0.57804	0.196743	-2.93804	0.00330291	0.0216419
AT2G39400	AT2G39400	206.333	-0.734965	0.263329	2.79105	0.0052538	0.0218934		AT2G39400	376.497	-0.489608	0.138035	-3.54698	0.000389672	0.00379616
AT2G41430	AT2G41430	4519.48	-0.460521	0.177093	2.60045	0.0093102	0.034918		AT2G41430	10656.8	-0.535835	0.0569931	-9.40175	5.36632e-21	7.87489e-19
AT2G41990	AT2G41990	4.73476	-1.07606	0.372237	2.89078	0.00384282	0.0169126		AT2G41990	236.646	-1.10084	0.141562	-7.77636	7.46423e-15	5.76073e-13
AT2G42040	AT2G42040	137.033	-2.08986	0.212209	9.84813	6.98277e-23	1.97376e-20		AT2G42040	392.594	-1.01372	0.107461	-9.43342	3.96918e-21	5.86594e-19
AT2G42490	AT2G42490	1209.31	-0.273587	0.0933673	2.93022	0.00338722	0.0152315		AT2G42490	1851.82	-0.544068	0.0643096	-8.46014	2.67062e-17	2.83931e-15
AT2G42610	AT2G42610	219.868	-0.790615	0.248273	3.18446	0.00145023	0.00755967		AT2G42610	355.574	-0.514052	0.116172	-4.42491	9.64815e-06	0.000152425
AT2G42870	AT2G42870	24.8968	-1.19334	0.37656	3.16905	0.0015294	0.00790865		AT2G42870	194.254	-0.39575	0.151868	-2.60589	0.00916366	0.0489873
AT2G44500	AT2G44500	57.277	-0.965442	0.251335	3.84126	0.000122406	0.000923176		AT2G44500	431.61	-1.60723	0.154213	-10.4222	1.96436e-25	4.20533e-23
AT2G44740	AT2G44740	55.4898	-1.51791	0.339652	4.46902	7.85794e-06	8.5014e-05		AT2G44740	146.448	-0.83944	0.164967	-5.08852	3.60875e-07	8.26275e-06
AT2G45170	AT2G45170	301.254	-1.43921	0.280517	5.13055	2.889e-07	4.66823e-06		AT2G45170	797.784	-0.671571	0.0815479	-8.2353	1.79108e-16	1.73064e-14
AT2G45180	AT2G45180	11674.3	-1.06425	0.122567	8.68297	3.85567e-18	5.02464e-16		AT2G45180	22412.4	-1.27177	0.0756443	-16.8125	1.9773e-63	3.74572e-60
AT2G45400	AT2G45400	62.8447	-2.06671	0.25671	8.05075	8.22911e-16	7.08798e-14		AT2G45400	332.607	-0.626533	0.129334	-4.84432	1.27049e-06	2.55053e-05
AT2G45510	AT2G45510	70.6213	-1.48507	0.253671	5.85431	4.78992e-09	1.16098e-07		AT2G45510	145.909	-0.488978	0.17078	-2.86321	0.00419377	0.0263144
AT2G46225	AT2G46225	224.32	-0.523237	0.127461	4.10508	4.0417e-05	0.000354669		AT2G46225	274.389	-0.695124	0.106596	-6.5211	6.97919e-11	3.16157e-09
AT2G46250	AT2G46250	380.755	-1.76216	0.153514	11.4788	1.6862e-30	1.25334e-27		AT2G46250	412.717	-0.521737	0.108753	-4.79746	1.6069e-06	3.14705e-05
AT2G46330	AT2G46330	527.611	-0.964603	0.156728	6.15465	7.52434e-10	2.19167e-08		AT2G46330	2142.82	-0.988169	0.122138	-8.09059	5.93751e-16	5.33301e-14
AT2G46490	AT2G46490	281.212	-0.846456	0.119943	7.05717	1.69933e-12	8.27764e-11		AT2G46490	628.583	-0.528807	0.0772301	-6.84716	7.53308e-12	3.87591e-10
AT2G47420	AT2G47420	267.141	-0.385119	0.146941	2.62092	0.00876939	0.0332125		AT2G47420	416.011	-0.297141	0.089203	-3.33107	0.00086514	0.00731647
AT2G48010	AT2G48010	101.402	-0.561567	0.20137	2.78873	0.00529146	0.0220227		AT2G48010	184.836	-0.348238	0.121046	-2.8769	0.00401601	0.0253593
AT3G01450	AT3G01450	93.9906	-0.505697	0.184168	2.74584	0.0060356	0.024515		AT3G01450	104.764	-0.479274	0.16355	-2.93044	0.00338478	0.0220619
AT3G01860	AT3G01860	330.608	-0.430341	0.113543	3.79012	0.000150572	0.00110366		AT3G01860	445.726	-0.330929	0.0857779	-3.85797	0.000114333	0.00132876
AT3G02170	AT3G02170	497.857	-1.07435	0.215434	4.98689	6.13579e-07	9.04105e-06		AT3G02170	844.195	-0.366609	0.116443	-3.14839	0.00164174	0.0123088
AT3G02600	AT3G02600	445.211	-0.282539	0.0873968	3.23283	0.00122572	0.00657553		AT3G02600	849.318	-0.229669	0.0768817	-2.9873	0.00281449	0.0190369
AT3G03020	AT3G03020	124.052	-0.47809	0.14856	3.21817	0.00129009	0.00685307		AT3G03020	154.042	-0.591938	0.149618	-3.95634	7.61074e-05	0.000936202
AT3G03870	AT3G03870	405.839	-0.655773	0.211524	3.10022	0.00193374	0.00957618		AT3G03870	341.624	-0.385459	0.123113	-3.13093	0.00174254	0.0128899
AT3G04210	AT3G04210	1091.52	-1.16505	0.229472	5.07711	3.83225e-07	5.98984e-06		AT3G04210	865.759	-1.88944	0.146801	-12.8707	6.57616e-38	3.4079e-35
AT3G04740	AT3G04740	557.057	-0.255396	0.0949409	2.69005	0.00714413	0.0281073		AT3G04740	744.553	-0.221317	0.0693216	-3.19262	0.00140989	0.010892
AT3G05150	AT3G05150	2.94364	-0.981459	0.363664	2.6988	0.00695892	0.0275363		AT3G05150	24.6078	-1.11605	0.429462	-2.59872	0.0093572	0.0498302
AT3G05160	AT3G05160	481.97	-0.909686	0.146573	6.20637	5.42214e-10	1.63389e-08		AT3G05160	773.583	-0.263443	0.0699155	-3.76802	0.000164547	0.00182384
AT3G05320	AT3G05320	67.2649	-0.754536	0.202489	3.72631	0.000194306	0.00137791		AT3G05320	100.249	-1.7388	0.202598	-8.58251	9.28234e-18	1.0127e-15
AT3G05690	AT3G05690	81.8094	-0.880678	0.207286	4.24862	2.15089e-05	0.000206537		AT3G05690	252.088	-0.431524	0.122719	-3.51635	0.000437529	0.00416883
AT3G05970	AT3G05970	533.434	-0.427196	0.094624	4.51467	6.3415e-06	7.03525e-05		AT3G05970	981.543	-0.226636	0.0692794	-3.27133	0.00107042	0.00867244
AT3G06070	AT3G06070	283.923	-0.943596	0.283049	3.33368	0.000857037	0.00485187		AT3G06070	660.73	-0.869334	0.154303	-5.63393	1.7615e-08	5.25875e-07
AT3G06450	AT3G06450	256.167	-0.394662	0.146251	2.69854	0.00696452	0.0275519		AT3G06450	587.687	-0.268317	0.0787321	-3.40798	0.000654462	0.00582807
AT3G07010	AT3G07010	386.604	-1.37684	0.28052	4.90817	9.19307e-07	1.28748e-05		AT3G07010	780.099	-0.326703	0.0886704	-3.68447	0.000229178	0.00242121
AT3G07460	AT3G07460	1078.08	-0.361403	0.089302	4.04698	5.18829e-05	0.000440829		AT3G07460	1536.97	-0.967789	0.133647	-7.2414	4.44079e-13	2.67448e-11
AT3G07540	AT3G07540	317.943	-0.60152	0.160085	3.7575	0.000171618	0.00123537		AT3G07540	560.032	-0.347331	0.104759	-3.31552	0.000914725	0.00763052
AT3G10520	AT3G10520	1128.93	-1.13684	0.11999	9.4745	2.68045e-21	5.7843e-19		AT3G10520	1380.11	-0.351237	0.102443	-3.42861	0.00060667	0.00547671
AT3G12145	AT3G12145	199.063	-1.80976	0.249459	7.25476	4.02362e-13	2.17655e-11		AT3G12145	385.911	-0.501663	0.118716	-4.22573	2.38167e-05	0.000341095
AT3G12610	AT3G12610	540.359	-0.90793	0.225387	4.02831	5.6179e-05	0.00047253		AT3G12610	1064.14	-0.530165	0.0970322	-5.46381	4.66031e-08	1.28116e-06
AT3G13750	AT3G13750	3994.27	-0.670849	0.223953	2.99549	0.00274002	0.0128191		AT3G13750	15570.9	-1.20109	0.119115	-10.0835	6.53801e-24	1.27326e-21
AT3G14020	AT3G14020	98.8569	-0.44334	0.153236	2.89318	0.00381357	0.0168023		AT3G14020	152.854	-0.741448	0.177145	-4.18555	2.84479e-05	0.00039652
AT3G14240	AT3G14240	1057.31	-0.931245	0.154548	6.02559	1.68494e-09	4.52072e-08		AT3G14240	2023	-0.313363	0.0582716	-5.37763	7.54718e-08	1.9832e-06
AT3G14310	AT3G14310	1158.08	-1.98756	0.215805	9.20998	3.26183e-20	5.84479e-18		AT3G14310	4356.83	-0.904878	0.0660974	-13.6901	1.16406e-42	8.66309e-40
AT3G15356	AT3G15356	232.185	-1.31014	0.35311	3.71028	0.000207028	0.00145325		AT3G15356	462.228	-0.953011	0.213917	-4.45506	8.38712e-06	0.000135376
AT3G15630	AT3G15630	20.414	-1.20194	0.36874	3.25959	0.00111572	0.00605501		AT3G15630	203.324	-0.924209	0.151443	-6.10267	1.04309e-09	4.02518e-08
AT3G16180	AT3G16180	63.3839	-1.11998	0.251652	4.45049	8.56748e-06	9.12389e-05		AT3G16180	225.965	-0.72584	0.118204	-6.14058	8.22207e-10	3.23267e-08
AT3G16530	AT3G16530	180.986	-1.77814	0.378663	4.69585	2.65502e-06	3.26693e-05		AT3G16530	185.32	-0.701915	0.195826	-3.58438	0.000337885	0.00336239
AT3G16660	AT3G16660	484.821	-0.488202	0.199641	2.4454	0.0144691	0.0495784		AT3G16660	1301.3	-0.816554	0.0750752	-10.8765	1.49214e-27	3.70158e-25
AT3G16850	AT3G16850	1493.53	-0.548659	0.105834	5.18415	2.17004e-07	3.62619e-06		AT3G16850	1921.9	-0.322209	0.0955175	-3.3733	0.000742743	0.00647856
AT3G16857	AT3G16857	490.771	-0.538234	0.187713	2.86733	0.00413956	0.0179432		AT3G16857	1049.25	-0.320701	0.073577	-4.35871	1.30829e-05	0.000200015
AT3G18830	AT3G18830	474.86	-0.403447	0.106015	3.80558	0.000141474	0.00104538		AT3G18830	808.27	-0.509363	0.105922	-4.80887	1.51789e-06	2.98676e-05
AT3G19130	AT3G19130	290.514	-0.431407	0.120532	3.57918	0.000344668	0.00224646		AT3G19130	577.909	-0.510549	0.0969514	-5.26603	1.39405e-07	3.48312e-06
AT3G19190	AT3G19190	465.828	-0.466184	0.14638	3.18475	0.00144881	0.00755424		AT3G19190	747.639	-0.251689	0.0781933	-3.2188	0.00128727	0.0100971
AT3G19400	AT3G19400	284.571	-0.706689	0.124732	5.66567	1.46449e-08	3.23605e-07		AT3G19400	286.658	-0.304596	0.110444	-2.75791	0.00581717	0.0340634
AT3G19820	AT3G19820	2087.8	-0.95625	0.196429	4.86817	1.12634e-06	1.53459e-05		AT3G19820	6840.27	-0.357255	0.050673	-7.0502	1.78656e-12	1.00076e-10
AT3G19850	AT3G19850	452.48	-1.22925	0.209446	5.86908	4.38213e-09	1.06859e-07		AT3G19850	457.873	-0.845536	0.140671	-6.01073	1.84694e-09	6.74018e-08
AT3G20395	AT3G20395	4.77601	-0.96443	0.369905	2.60724	0.00912762	0.0343617		AT3G20395	43.5084	-0.728695	0.264005	-2.76016	0.00577737	0.0338742
AT3G21530	AT3G21530	33.5205	-0.683546	0.27311	2.50283	0.0123206	0.0435579		AT3G21530	216.005	-0.755899	0.140373	-5.38491	7.24801e-08	1.91182e-06
AT3G21560	AT3G21560	135.444	-0.720265	0.222748	3.23355	0.00122264	0.00656131		AT3G21560	399.039	-0.343645	0.107021	-3.21101	0.0013227	0.0103346
AT3G22750	AT3G22750	134.972	-0.374011	0.145957	2.56248	0.0103928	0.0381862		AT3G22750	377.922	-1.73408	0.190273	-9.11364	7.96614e-20	1.04401e-17
AT3G23480	AT3G23480	489.833	-0.633829	0.156051	4.06169	4.87189e-05	0.000417302		AT3G23480	270.762	-0.377542	0.107861	-3.50026	0.000464801	0.00438854
AT3G23550	AT3G23550	39.5665	-1.32121	0.360893	3.66095	0.000251281	0.00171704		AT3G23550	93.3782	-1.21931	0.25897	-4.70832	2.49767e-06	4.65532e-05
AT3G23690	AT3G23690	488.389	-0.354061	0.107061	3.30711	0.000942625	0.00525437		AT3G23690	689.416	-0.372209	0.080746	-4.60963	4.03385e-06	7.05771e-05
AT3G25070	AT3G25070	384.185	-0.888365	0.15933	5.57561	2.46659e-08	5.16322e-07		AT3G25070	379.141	-0.391777	0.117786	-3.32619	0.000880418	0.00739466
AT3G26200	AT3G26200	42.401	-3.33178	0.359051	9.2794	1.7043e-20	3.22676e-18		AT3G26200	106.098	-1.85752	0.21507	-8.63682	5.78007e-18	6.51054e-16
AT3G26810	AT3G26810	547.849	-0.323086	0.109905	2.93969	0.00328538	0.0149038		AT3G26810	701.71	-0.370322	0.0767163	-4.82716	1.38494e-06	2.7485e-05
AT3G26932	AT3G26932	184.389	-0.454585	0.143333	3.17152	0.00151642	0.00785571		AT3G26932	285.192	-0.318186	0.107152	-2.96948	0.002983	0.0199166
AT3G27770	AT3G27770	765.942	-0.586377	0.141871	4.13316	3.57807e-05	0.000318723		AT3G27770	1196.79	-0.561786	0.078116	-7.19169	6.39947e-13	3.78842e-11
AT3G28180	AT3G28180	928.751	-0.286741	0.106532	2.69159	0.00711116	0.0279996		AT3G28180	1277.96	-0.633084	0.163017	-3.88354	0.000102946	0.00121747
AT3G28650	AT3G28650	33.6094	-1.5544	0.273628	5.68069	1.34149e-08	3.00472e-07		AT3G28650	64.9514	-0.618826	0.217294	-2.84787	0.00440124	0.0273526
AT3G28940	AT3G28940	1936.96	-0.528024	0.160367	3.2926	0.000992641	0.00546838		AT3G28940	1526.37	-0.350175	0.0977019	-3.58412	0.000338217	0.00336409
AT3G29670	AT3G29670	231.008	-0.812823	0.221999	3.66139	0.000250852	0.00171469		AT3G29670	158.83	-0.888498	0.167966	-5.28974	1.22488e-07	3.10135e-06
AT3G29810	AT3G29810	62.7792	-0.72912	0.260788	2.79583	0.00517665	0.0216393		AT3G29810	84.4531	-1.22528	0.242467	-5.05338	4.34059e-07	9.76774e-06
AT3G30180	AT3G30180	182.002	-0.972024	0.214791	4.52543	6.02718e-06	6.73119e-05		AT3G30180	374.159	-0.633371	0.153751	-4.11945	3.7978e-05	0.000513887
AT3G30775	AT3G30775	287.478	-0.823654	0.271138	3.03777	0.00238339	0.0114158		AT3G30775	1643.94	-1.71157	0.164305	-10.417	2.07356e-25	4.36452e-23
AT3G42800	AT3G42800	7.80985	-1.01207	0.379941	2.66376	0.0077272	0.030013		AT3G42800	39.6971	-0.995562	0.345553	-2.88107	0.00396329	0.02509
AT3G43270	AT3G43270	302.354	-0.391214	0.137145	2.85256	0.00433682	0.0186892		AT3G43270	179.227	-0.442824	0.139627	-3.17149	0.00151659	0.0115634
AT3G43800	AT3G43800	353.535	-0.678431	0.129628	5.23366	1.66188e-07	2.87024e-06		AT3G43800	620.615	-0.447294	0.107822	-4.14845	3.34729e-05	0.000459492
AT3G45160	AT3G45160	491.971	-0.957118	0.195164	4.90417	9.38254e-07	1.31036e-05		AT3G45160	715.058	-0.303109	0.0708854	-4.27605	1.90241e-05	0.000279172
AT3G47360	AT3G47360	69.762	-0.568752	0.185726	3.06232	0.00219626	0.0106491		AT3G47360	132.21	-0.638108	0.165493	-3.8558	0.00011535	0.00133834
AT3G47570	AT3G47570	148.23	-0.843811	0.165684	5.09289	3.52644e-07	5.56384e-06		AT3G47570	193.997	-0.578027	0.144687	-3.99502	6.4689e-05	0.000817458
AT3G48195	AT3G48195	214.333	-0.369936	0.13628	2.71453	0.00663697	0.0264701		AT3G48195	264.095	-0.326143	0.107929	-3.02184	0.00251247	0.0173936
AT3G50500	AT3G50500	836.032	-0.668656	0.141921	4.71148	2.45925e-06	3.0447e-05		AT3G50500	1452.73	-0.187618	0.0705999	-2.65748	0.00787265	0.0435031
AT3G50740	AT3G50740	661.57	-1.03618	0.219345	4.72396	2.31296e-06	2.88495e-05		AT3G50740	852.413	-0.492311	0.145463	-3.38445	0.000713216	0.00626032
AT3G51910	AT3G51910	4.58008	-1.63676	0.379055	4.318	1.5745e-05	0.000157364		AT3G51910	116.537	-1.27915	0.219463	-5.82857	5.59043e-09	1.87289e-07
AT3G52500	AT3G52500	1047.68	-0.83658	0.154125	5.42792	5.70149e-08	1.09391e-06		AT3G52500	1619.46	-0.313983	0.0774365	-4.05472	5.01954e-05	0.000651696
AT3G53800	AT3G53800	561.491	-0.600519	0.158174	3.79656	0.000146717	0.00108094		AT3G53800	897.327	-0.609928	0.121952	-5.00138	5.69217e-07	1.23588e-05
AT3G54620	AT3G54620	611.037	-0.371444	0.109395	3.39543	0.0006852	0.00402909		AT3G54620	955.637	-0.423768	0.105912	-4.00115	6.30349e-05	0.000799952
AT3G54880	AT3G54880	145.089	-0.514786	0.184001	2.79773	0.00514632	0.0215439		AT3G54880	510.463	-0.46149	0.0857339	-5.38282	7.33278e-08	1.93174e-06
AT3G56060	AT3G56060	472.22	-1.05132	0.137427	7.64997	2.01022e-14	1.34261e-12		AT3G56060	558.13	-0.724237	0.138291	-5.23703	1.63178e-07	3.99566e-06
AT3G56200	AT3G56200	375.684	-0.56358	0.146473	3.84768	0.000119241	0.000904404		AT3G56200	275.196	-1.22758	0.16727	-7.3389	2.15351e-13	1.37232e-11
AT3G56480	AT3G56480	116.165	-0.876875	0.173386	5.05737	4.25072e-07	6.56214e-06		AT3G56480	405.278	-0.272899	0.102317	-2.66718	0.00764898	0.0425606
AT3G57330	AT3G57330	1054.1	-0.875559	0.158415	5.527	3.25755e-08	6.61698e-07		AT3G57330	963.862	-0.377959	0.0932667	-4.05245	5.06836e-05	0.000656709
AT3G58120	AT3G58120	166.457	-1.09	0.363833	2.99589	0.00273645	0.0128103		AT3G58120	1597.63	-0.8016	0.305656	-2.62256	0.00872715	0.0470886
AT3G58620	AT3G58620	159.744	-0.350401	0.125799	2.7854	0.00534621	0.0222001		AT3G58620	567.776	-0.59187	0.134233	-4.40926	1.03724e-05	0.000162633
AT3G59010	AT3G59010	127.634	-1.01944	0.185415	5.49813	3.8383e-08	7.66476e-07		AT3G59010	189.582	-0.855495	0.185807	-4.60421	4.14036e-06	7.21308e-05
AT3G59310	AT3G59310	127.834	-0.908181	0.18488	4.91228	9.00241e-07	1.26697e-05		AT3G59310	147.099	-0.478841	0.1394	-3.43501	0.000592543	0.00536844
AT3G60130	AT3G60130	263.109	-1.96954	0.218108	9.03011	1.71494e-19	2.77557e-17		AT3G60130	687.239	-0.686398	0.07953	-8.63068	6.09878e-18	6.83261e-16
AT3G61950	AT3G61950	41.9957	-1.00666	0.271743	3.70446	0.000211844	0.00148446		AT3G61950	97.5541	-0.652911	0.172446	-3.78618	0.000152978	0.00170834
AT3G62110	AT3G62110	509.665	-0.687778	0.124463	5.52598	3.27657e-08	6.64218e-07		AT3G62110	805.248	-0.429372	0.111724	-3.84315	0.000121467	0.00139847
AT3G62150	AT3G62150	57.5882	-2.22231	0.265292	8.37685	5.43633e-17	5.65293e-15		AT3G62150	670.862	-2.71186	0.277917	-9.75783	1.70776e-22	3.06779e-20
AT3G62420	AT3G62420	372.173	-0.272724	0.0969206	2.81389	0.00489463	0.0206193		AT3G62420	1150.81	-0.390181	0.136056	-2.86779	0.00413349	0.0260136
AT3G63310	AT3G63310	468.413	-0.316524	0.111338	2.84292	0.00447023	0.0191408		AT3G63310	531.874	-0.287397	0.0896418	-3.20606	0.00134566	0.0104825
AT4G00300	AT4G00300	397.343	-0.447413	0.119998	3.7285	0.000192621	0.00136985		AT4G00300	701.613	-0.779482	0.0889515	-8.76301	1.90107e-18	2.22554e-16
AT4G00720	AT4G00720	1342.65	-0.564889	0.0980716	5.75996	8.41317e-09	1.95421e-07		AT4G00720	1653.94	-0.194633	0.0695507	-2.79844	0.00513503	0.0307747
AT4G00950	AT4G00950	68.3276	-1.50904	0.224768	6.71379	1.89636e-11	7.56622e-10		AT4G00950	291.114	-1.40524	0.125457	-11.201	4.03362e-29	1.1207e-26
AT4G01390	AT4G01390	270.952	-2.62279	0.363726	7.2109	5.5583e-13	2.94326e-11		AT4G01390	163.387	-0.51181	0.145169	-3.5256	0.000422522	0.00405841
AT4G01610	AT4G01610	844.739	-0.584256	0.153296	3.8113	0.000138237	0.00102372		AT4G01610	1075.34	-0.260834	0.0834126	-3.12703	0.00176581	0.0130113
AT4G01750	AT4G01750	23.8025	-1.13959	0.292045	3.90209	9.53665e-05	0.000746455		AT4G01750	69.6953	-1.48871	0.289008	-5.15109	2.58972e-07	6.07709e-06
AT4G02540	AT4G02540	280.629	-0.717905	0.195213	3.67754	0.000235491	0.00161963		AT4G02540	737.286	-0.512308	0.176556	-2.90167	0.00371175	0.023742
AT4G03110	AT4G03110	433.965	-0.319351	0.0887014	3.60029	0.000317859	0.00210036		AT4G03110	897.723	-0.684193	0.0919514	-7.44082	1.00066e-13	6.64067e-12
AT4G03190	AT4G03190	117.869	-1.29814	0.249213	5.20895	1.89914e-07	3.22179e-06		AT4G03190	483.459	-0.283152	0.0967732	-2.92593	0.00343427	0.0223287
AT4G03390	AT4G03390	701.817	-0.342381	0.114487	2.99056	0.00278463	0.0129904		AT4G03390	1049.46	-0.294232	0.0876747	-3.35595	0.00079092	0.00679357
AT4G04570	AT4G04570	546.29	-0.941313	0.204191	4.60996	4.02744e-06	4.74335e-05		AT4G04570	693.961	-0.455708	0.138396	-3.29277	0.000992042	0.00815149
AT4G04955	AT4G04955	439.397	-0.988697	0.1715	5.765	8.16597e-09	1.91006e-07		AT4G04955	887.794	-1.87445	0.0967801	-19.3682	1.43238e-83	5.9696e-80
AT4G04960	AT4G04960	125.385	-0.499389	0.16081	3.10546	0.00189984	0.00945869		AT4G04960	207.439	-0.699566	0.150491	-4.64856	3.34259e-06	6.00456e-05
AT4G08040	AT4G08040	6.54943	-1.44782	0.373882	3.87239	0.000107774	0.000829977		AT4G08040	17.7068	-1.15076	0.419496	-2.74319	0.00608455	0.0353569
AT4G08470	AT4G08470	565.176	-0.481896	0.185747	2.59436	0.00947661	0.0354692		AT4G08470	388.505	-0.331787	0.0916251	-3.62113	0.000293316	0.00297861
AT4G09160	AT4G09160	100.71	-0.996441	0.250793	3.97315	7.09274e-05	0.000577696		AT4G09160	742.361	-0.792855	0.11068	-7.16351	7.8637e-13	4.60651e-11
AT4G11290	AT4G11290	10.9014	-1.37705	0.380439	3.61963	0.000295021	0.00196769		AT4G11290	102.2	-1.10124	0.315993	-3.48501	0.00049212	0.00459444
AT4G11820	AT4G11820	648.115	-0.276075	0.112286	2.45869	0.0139446	0.0481221		AT4G11820	1331.4	-0.299434	0.067727	-4.42118	9.81625e-06	0.000154728
AT4G12420	AT4G12420	1469.75	-0.454608	0.152943	2.97241	0.00295474	0.0136538		AT4G12420	4173.95	-0.685532	0.092039	-7.44828	9.45674e-14	6.33632e-12
AT4G13410	AT4G13410	149.932	-1.15234	0.380464	3.02878	0.00245541	0.0117021		AT4G13410	161.997	-0.481893	0.162563	-2.96435	0.00303327	0.0201875
AT4G14750	AT4G14750	62.6756	-0.758295	0.19249	3.93941	8.16825e-05	0.000653362		AT4G14750	158.562	-0.721126	0.146176	-4.93326	8.08674e-07	1.67613e-05
AT4G15233	AT4G15233	79.2091	-0.842618	0.309358	2.72376	0.00645427	0.0258596		AT4G15233	90.2871	-1.38822	0.194103	-7.15198	8.55357e-13	4.97875e-11
AT4G15540	AT4G15540	1276.41	-0.511559	0.174086	2.93854	0.00329765	0.0149459		AT4G15540	681.142	-0.251286	0.0943018	-2.6647	0.0077056	0.0427843
AT4G15800	AT4G15800	234.838	-0.84682	0.114988	7.36444	1.77886e-13	1.0142e-11		AT4G15800	415.593	-0.630825	0.128407	-4.9127	8.98324e-07	1.84791e-05
AT4G17030	AT4G17030	98.7135	-1.29922	0.321714	4.03844	5.38084e-05	0.00045507		AT4G17030	196.768	-0.802693	0.146895	-5.46438	4.64524e-08	1.2787e-06
AT4G17070	AT4G17070	144.477	-0.583856	0.185923	3.14031	0.00168769	0.00858777		AT4G17070	207.239	-0.551346	0.145055	-3.80095	0.000144145	0.0016175
AT4G17140	AT4G17140	583.852	-0.419348	0.0774356	5.41545	6.11348e-08	1.16185e-06		AT4G17140	1114.95	-0.362662	0.0910266	-3.98413	6.77272e-05	0.000849668
AT4G17245	AT4G17245	176.876	-0.567787	0.175781	3.23007	0.00123758	0.00662497		AT4G17245	488.038	-0.770054	0.100632	-7.65216	1.97627e-14	1.45005e-12
AT4G17870	AT4G17870	650.418	-0.479325	0.119061	4.02589	5.67593e-05	0.000476308		AT4G17870	1235.53	-0.980582	0.0761958	-12.8692	6.70525e-38	3.4079e-35
AT4G17880	AT4G17880	685.993	-0.314858	0.101029	3.11651	0.00183007	0.00917046		AT4G17880	360.625	-0.318256	0.0989271	-3.21707	0.00129505	0.0101414
AT4G18197	AT4G18197	111.518	-1.36777	0.263305	5.19463	2.0513e-07	3.44498e-06		AT4G18197	118.597	-0.950824	0.182103	-5.22134	1.77633e-07	4.27922e-06
AT4G18205	AT4G18205	230.591	-1.01571	0.188208	5.39674	6.7864e-08	1.27405e-06		AT4G18205	405.509	-1.54739	0.190085	-8.14053	3.93544e-16	3.58107e-14
AT4G18970	AT4G18970	1178.07	-1.18659	0.256502	4.62604	3.72717e-06	4.43394e-05		AT4G18970	1755.82	-0.300928	0.101	-2.97949	0.00288732	0.0194021
AT4G19160	AT4G19160	1114.76	-0.724668	0.200482	3.61462	0.000300787	0.00199686		AT4G19160	1756.32	-0.387395	0.0832931	-4.65099	3.30342e-06	5.94444e-05
AT4G19200	AT4G19200	2063.67	-0.434857	0.102254	4.25271	2.11195e-05	0.000203187		AT4G19200	1717.49	-0.19018	0.0644091	-2.95268	0.00315024	0.0208528
AT4G19410	AT4G19410	540.765	-0.652424	0.178625	3.65248	0.000259717	0.00176567		AT4G19410	2131.45	-0.795401	0.0691608	-11.5007	1.3078e-30	4.00763e-28
AT4G19420	AT4G19420	376.055	-0.808694	0.190858	4.23715	2.26371e-05	0.000215514		AT4G19420	1800.04	-1.14997	0.143257	-8.02734	9.96047e-16	8.54141e-14
AT4G19530	AT4G19530	2080.55	-0.560949	0.0870597	6.44327	1.16923e-10	4.10951e-09		AT4G19530	2156.32	-0.498349	0.121774	-4.09239	4.26946e-05	0.00056848
AT4G20260	AT4G20260	1284.37	-1.20071	0.230324	5.21314	1.85674e-07	3.15788e-06		AT4G20260	6835.72	-1.51712	0.146427	-10.361	3.73228e-25	7.62483e-23
AT4G21870	AT4G21870	91.4898	-1.01139	0.2146	4.71289	2.44225e-06	3.02927e-05		AT4G21870	626.362	-2.20815	0.15971	-13.826	1.77629e-43	1.42363e-40
AT4G22690	AT4G22690	2320.15	-0.556231	0.14516	3.83185	0.000127183	0.000954539		AT4G22690	1425.49	-0.525055	0.167535	-3.13399	0.00172444	0.0127788
AT4G23130	AT4G23130	234.922	-1.11214	0.262328	4.23951	2.24011e-05	0.000213877		AT4G23130	23.6172	-1.55314	0.484003	-3.20894	0.00133227	0.0103938
AT4G23400	AT4G23400	1935.67	-1.29283	0.140782	9.18322	4.1838e-20	7.30127e-18		AT4G23400	4001.96	-1.58781	0.0937668	-16.9337	2.54087e-64	5.29466e-61
AT4G23820	AT4G23820	447.928	-1.54174	0.26096	5.90794	3.46409e-09	8.65764e-08		AT4G23820	1877.97	-0.931202	0.0899757	-10.3495	4.2074e-25	8.51201e-23
AT4G25100	AT4G25100	16927.7	-0.635318	0.181116	3.5078	0.000451825	0.00282482		AT4G25100	9132	-0.329859	0.100857	-3.27055	0.00107337	0.0086862
AT4G25810	AT4G25810	5.44874	-1.41135	0.380323	3.71094	0.000206494	0.00145103		AT4G25810	59.4536	-2.0511	0.317353	-6.46314	1.02553e-10	4.51797e-09
AT4G25880	AT4G25880	703.822	-0.240611	0.0879444	2.73595	0.00622003	0.0250864		AT4G25880	955.769	-0.166376	0.0626342	-2.65631	0.00790013	0.0436211
AT4G25940	AT4G25940	314.675	-0.53249	0.17059	3.12146	0.00179957	0.00905381		AT4G25940	305.711	-1.15344	0.107402	-10.7395	6.6423e-27	1.57287e-24
AT4G27435	AT4G27435	71.1986	-0.642398	0.238365	2.69502	0.00703845	0.0277623		AT4G27435	124.247	-0.467204	0.144195	-3.24009	0.00119493	0.00948573
AT4G27440	AT4G27440	7133.82	-0.388847	0.151258	2.57075	0.0101479	0.0374301		AT4G27440	16968.1	-0.342869	0.0892412	-3.84205	0.000122012	0.00140314
AT4G27900	AT4G27900	127.035	-0.864305	0.21148	4.08693	4.37113e-05	0.000379759		AT4G27900	173.709	-0.673383	0.135632	-4.96479	6.87763e-07	1.46241e-05
AT4G28710	AT4G28710	571.728	-0.535879	0.126719	4.22889	2.34845e-05	0.000222002		AT4G28710	650.276	-0.515518	0.0895889	-5.75426	8.70201e-09	2.80267e-07
AT4G29080	AT4G29080	212.22	-0.831389	0.197005	4.22013	2.44157e-05	0.000229938		AT4G29080	413.34	-0.299701	0.0983652	-3.04682	0.00231279	0.0162269
AT4G29310	AT4G29310	101.863	-0.62624	0.204152	3.06752	0.00215841	0.0105087		AT4G29310	510.212	-1.18731	0.208875	-5.68432	1.31331e-08	4.04058e-07
AT4G30270	AT4G30270	198.823	-1.26459	0.306287	4.12879	3.6468e-05	0.000324413		AT4G30270	984.049	-0.887916	0.12972	-6.84487	7.65451e-12	3.92869e-10
AT4G30790	AT4G30790	706.256	-0.338923	0.115471	2.93513	0.00333412	0.0150568		AT4G30790	971.545	-0.310912	0.0814745	-3.81606	0.000135599	0.00153315
AT4G30850	AT4G30850	26.1372	-0.764935	0.270517	2.82767	0.00468874	0.0198897		AT4G30850	176.149	-0.457252	0.169782	-2.69318	0.00707748	0.0399028
AT4G31050	AT4G31050	112.19	-1.13574	0.251477	4.51629	6.29321e-06	6.99714e-05		AT4G31050	191.979	-0.463027	0.129366	-3.57921	0.000344637	0.00341491
AT4G31820	AT4G31820	416.199	-1.58254	0.174172	9.0861	1.02659e-19	1.71689e-17		AT4G31820	1024.5	-0.346298	0.0817452	-4.23631	2.27225e-05	0.00032641
AT4G32150	AT4G32150	817.804	-0.960751	0.130649	7.35369	1.9281e-13	1.09308e-11		AT4G32150	1194.03	-0.226283	0.0727573	-3.11011	0.00187019	0.0136214
AT4G32950	AT4G32950	8.00453	-1.00415	0.373597	2.68779	0.00719273	0.0282653		AT4G32950	85.1006	-2.19794	0.266426	-8.24974	1.58744e-16	1.54575e-14
AT4G34760	AT4G34760	164.055	-0.948455	0.234728	4.04066	5.33004e-05	0.000450964		AT4G34760	515.345	-0.443993	0.118055	-3.76089	0.00016931	0.00187167
AT4G34770	AT4G34770	14.7939	-1.01461	0.379762	2.6717	0.00754677	0.0294433		AT4G34770	95.4434	-1.66483	0.310618	-5.35975	8.33379e-08	2.17074e-06
AT4G34790	AT4G34790	14.816	-1.32286	0.380523	3.47641	0.000508168	0.00311783		AT4G34790	64.1425	-0.632697	0.235073	-2.69149	0.00711326	0.0400611
AT4G35920	AT4G35920	585.615	-0.483486	0.100508	4.81042	1.50616e-06	1.99651e-05		AT4G35920	979.135	-0.250767	0.0710943	-3.52725	0.000419906	0.00404157
AT4G36570	AT4G36570	39.5327	-1.89161	0.364919	5.18363	2.17604e-07	3.6332e-06		AT4G36570	133.526	-2.41966	0.200843	-12.0475	1.9988e-33	7.30719e-31
AT4G36670	AT4G36670	95.7914	-0.974521	0.337157	2.89041	0.00384744	0.0169185		AT4G36670	395.865	-1.27777	0.140712	-9.08076	1.07823e-19	1.39554e-17
AT4G37520	AT4G37520	163.274	-0.849692	0.268682	3.16244	0.00156453	0.0080509		AT4G37520	571.731	-0.535067	0.101909	-5.25042	1.51754e-07	3.76011e-06
AT4G37800	AT4G37800	3494.21	-0.934103	0.14133	6.60938	3.85938e-11	1.4559e-09		AT4G37800	3219.31	-0.504761	0.135624	-3.72178	0.000197824	0.00213478
AT4G38420	AT4G38420	239.196	-0.474937	0.14787	3.21187	0.00131876	0.00697579		AT4G38420	554.547	-0.69372	0.0794706	-8.72926	2.56339e-18	2.95115e-16
AT4G38690	AT4G38690	696.381	-0.244068	0.0954767	2.55631	0.0105788	0.0387278		AT4G38690	890.699	-0.492451	0.115453	-4.26537	1.99571e-05	0.000291223
AT4G38860	AT4G38860	1034.82	-1.0196	0.12742	8.00189	1.22521e-15	1.04189e-13		AT4G38860	1021.34	-0.327418	0.114592	-2.85726	0.00427314	0.0267077
AT4G39400	AT4G39400	1742.55	-0.660586	0.112514	5.87116	4.32746e-09	1.05783e-07		AT4G39400	3346.58	-0.257224	0.0760497	-3.38232	0.000718775	0.0062985
AT4G39640	AT4G39640	676.775	-0.932896	0.186736	4.9958	5.85933e-07	8.6783e-06		AT4G39640	874.481	-0.613535	0.124914	-4.91166	9.03063e-07	1.85217e-05
AT5G01710	AT5G01710	549.326	-0.340728	0.100459	3.3917	0.000694613	0.00406538		AT5G01710	986.728	-0.512623	0.0773265	-6.62933	3.37208e-11	1.59699e-09
AT5G03120	AT5G03120	68.6286	-2.2409	0.237379	9.44016	3.72204e-21	7.70078e-19		AT5G03120	291.701	-1.45708	0.20886	-6.97635	3.0295e-12	1.64398e-10
AT5G03150	AT5G03150	35.9213	-1.23732	0.357292	3.46306	0.000534063	0.00325878		AT5G03150	187.867	-0.461667	0.162916	-2.83377	0.00460027	0.0282858
AT5G03355	AT5G03355	9.13715	-1.24001	0.37266	3.32745	0.000876434	0.00493212		AT5G03355	109.744	-1.35966	0.170621	-7.9689	1.60097e-15	1.34521e-13
AT5G03730	AT5G03730	903.392	-0.414438	0.147341	2.81278	0.00491147	0.0206729		AT5G03730	1110.04	-0.362816	0.0620734	-5.84494	5.0674e-09	1.71142e-07
AT5G04530	AT5G04530	62.7907	-1.4541	0.336947	4.31553	1.59223e-05	0.000158454		AT5G04530	731.014	-0.369565	0.123828	-2.9845	0.00284044	0.0191737
AT5G05320	AT5G05320	8.81523	-1.15492	0.378473	3.05153	0.0022768	0.010976		AT5G05320	25.9475	-1.12657	0.339822	-3.31518	0.000915834	0.00763671
AT5G05440	AT5G05440	51.8893	-1.42482	0.300512	4.74131	2.12345e-06	2.68022e-05		AT5G05440	514.261	-1.53141	0.129625	-11.8142	3.29762e-32	1.16467e-29
AT5G05790	AT5G05790	80.0319	-0.751444	0.18085	4.15506	3.25205e-05	0.000292801		AT5G05790	108.387	-0.727857	0.15367	-4.73651	2.17435e-06	4.12275e-05
AT5G06930	AT5G06930	24.1485	-1.3891	0.311432	4.46036	8.1822e-06	8.79532e-05		AT5G06930	136.414	-0.759735	0.143768	-5.28446	1.26074e-07	3.16904e-06
AT5G07000	AT5G07000	84.5721	-0.972828	0.214179	4.54211	5.56928e-06	6.28274e-05		AT5G07000	278.787	-0.867109	0.191431	-4.52961	5.90934e-06	9.88274e-05
AT5G07580	AT5G07580	330.624	-0.953907	0.133593	7.1404	9.30584e-13	4.70426e-11		AT5G07580	584.619	-1.36753	0.0949077	-14.4091	4.53878e-47	3.9408e-44
AT5G07770	AT5G07770	269.553	-0.747632	0.197408	3.78723	0.000152334	0.00111495		AT5G07770	223.276	-0.345347	0.131475	-2.62671	0.00862145	0.0466512
AT5G07830	AT5G07830	388.548	-0.335533	0.136632	2.45573	0.0140597	0.0484531		AT5G07830	351.442	-0.352561	0.0993091	-3.55014	0.000385027	0.0037597
AT5G08330	AT5G08330	1021.08	-0.54752	0.146825	3.72907	0.000192188	0.00136774		AT5G08330	1831.1	-0.440045	0.125339	-3.51083	0.000446708	0.00424851
AT5G08520	AT5G08520	283.917	-0.462259	0.131273	3.52137	0.000429327	0.00271205		AT5G08520	550.964	-0.359427	0.126497	-2.84139	0.0044917	0.0277708
AT5G09220	AT5G09220	963.349	-1.39172	0.218668	6.36456	1.95856e-10	6.50766e-09		AT5G09220	2701.32	-0.763626	0.0754852	-10.1162	4.68096e-24	9.20205e-22
AT5G09300	AT5G09300	32.9084	-1.41095	0.311379	4.53129	5.86258e-06	6.56563e-05		AT5G09300	190.213	-0.842416	0.148623	-5.66813	1.44362e-08	4.38516e-07
AT5G09670	AT5G09670	837.604	-0.184386	0.0743339	2.48051	0.0131195	0.0458304		AT5G09670	1120.44	-0.385577	0.101992	-3.78047	0.000156534	0.00174337
AT5G10170	AT5G10170	577.716	-1.18084	0.13118	9.00174	2.22169e-19	3.5108e-17		AT5G10170	601.495	-0.72989	0.112562	-6.48435	8.91157e-11	3.96793e-09
AT5G11070	AT5G11070	191.667	-0.704865	0.184207	3.82649	0.000129984	0.000971198		AT5G11070	520.235	-0.635179	0.129003	-4.92375	8.4901e-07	1.75339e-05
AT5G11250	AT5G11250	397.552	-0.472428	0.139856	3.37795	0.000730273	0.00424315		AT5G11250	240.384	-0.505161	0.130957	-3.85747	0.000114565	0.00133072
AT5G12050	AT5G12050	340.329	-1.47875	0.337452	4.38211	1.17536e-05	0.000121027		AT5G12050	810.727	-0.446619	0.166625	-2.68038	0.00735389	0.0411715
AT5G12420	AT5G12420	15.2785	-0.956218	0.35443	2.6979	0.00697775	0.027588		AT5G12420	255.563	-0.731056	0.172034	-4.24949	2.1426e-05	0.000309621
AT5G13710	AT5G13710	746.732	-0.86791	0.134781	6.43942	1.19928e-10	4.20039e-09		AT5G13710	1949.82	-0.756491	0.066127	-11.44	2.63949e-30	7.53448e-28
AT5G13760	AT5G13760	256.305	-0.548122	0.162333	3.37653	0.000734056	0.00425651		AT5G13760	378.904	-0.715316	0.102161	-7.00187	2.5256e-12	1.39229e-10
AT5G14120	AT5G14120	1122.5	-0.78907	0.158481	4.97894	6.39331e-07	9.38606e-06		AT5G14120	3796.77	-0.938526	0.109167	-8.59715	8.1718e-18	9.00973e-16
AT5G15330	AT5G15330	88.8454	-0.47361	0.183162	2.58574	0.00971699	0.03618		AT5G15330	170.907	-0.68979	0.130459	-5.2874	1.24067e-07	3.12991e-06
AT5G15350	AT5G15350	531.187	-0.499698	0.189341	2.63915	0.00831146	0.0318342		AT5G15350	2307.8	-0.612412	0.109216	-5.60734	2.05465e-08	6.05584e-07
AT5G16170	AT5G16170	15.6561	-1.20069	0.361136	3.32477	0.000884911	0.0049718		AT5G16170	20.3781	-1.10229	0.371374	-2.96815	0.00299597	0.019984
AT5G16190	AT5G16190	108.6	-1.2014	0.206979	5.80448	6.45671e-09	1.53349e-07		AT5G16190	132.628	-0.704923	0.18677	-3.77429	0.000160464	0.00178238
AT5G17880	AT5G17880	445.904	-0.450458	0.116323	3.87247	0.000107739	0.000829977		AT5G17880	412.943	-0.314649	0.0908486	-3.46344	0.000533316	0.00491736
AT5G18290	AT5G18290	26.4277	-0.885067	0.265847	3.32923	0.000870867	0.00491356		AT5G18290	72.1249	-0.68613	0.200668	-3.41924	0.000627974	0.00563069
AT5G18460	AT5G18460	352.733	-0.447756	0.125103	3.57911	0.000344766	0.00224646		AT5G18460	521.15	-0.244294	0.0817468	-2.98843	0.00280416	0.0189841
AT5G18490	AT5G18490	118.961	-0.574255	0.181967	3.15582	0.00160047	0.0082043		AT5G18490	184.888	-0.816782	0.126282	-6.46794	9.93455e-11	4.38594e-09
AT5G21105	AT5G21105	597.678	-0.368159	0.131044	2.80944	0.00496283	0.0208716		AT5G21105	1142.43	-0.695263	0.0744034	-9.3445	9.2323e-21	1.29116e-18
AT5G21170	AT5G21170	315.184	-1.39245	0.360255	3.86519	0.000111002	0.000850779		AT5G21170	997.298	-0.32052	0.0930555	-3.4444	0.000572324	0.0052079
AT5G21930	AT5G21930	2429.24	-0.288298	0.0876382	3.28964	0.00100316	0.00551724		AT5G21930	2936.48	-0.199979	0.070844	-2.8228	0.00476061	0.0290573
AT5G23210	AT5G23210	514.504	-0.517719	0.106505	4.861	1.16794e-06	1.58911e-05		AT5G23210	885.63	-0.384788	0.102025	-3.77151	0.000162262	0.0018014
AT5G23280	AT5G23280	500.71	-1.09104	0.122084	8.93677	4.00708e-19	6.18601e-17		AT5G23280	728.919	-0.468364	0.106749	-4.38753	1.14647e-05	0.00017749
AT5G23510	AT5G23510	90.1573	-0.626349	0.204459	3.06344	0.00218806	0.0106145		AT5G23510	100.153	-1.24002	0.188473	-6.5793	4.72674e-11	2.18394e-09
AT5G24270	AT5G24270	7.51789	-1.42732	0.372768	3.82896	0.000128684	0.000963639		AT5G24270	76.8572	-0.915184	0.252425	-3.62557	0.000288324	0.00294226
AT5G25900	AT5G25900	270.185	-0.486022	0.167392	2.9035	0.00369018	0.016334		AT5G25900	450.538	-0.373453	0.0903791	-4.13207	3.59507e-05	0.000489048
AT5G27380	AT5G27380	1166.88	-0.625664	0.120454	5.19423	2.05573e-07	3.44953e-06		AT5G27380	1701.58	-0.297022	0.0620223	-4.78895	1.67658e-06	3.27121e-05
AT5G27860	AT5G27860	414.256	-0.481886	0.115613	4.16808	3.07172e-05	0.000279195		AT5G27860	614.253	-0.239731	0.0761414	-3.1485	0.00164111	0.0123088
AT5G28770	AT5G28770	693.363	-0.668822	0.201882	3.31294	0.000923202	0.00516237		AT5G28770	1128.87	-0.453316	0.114921	-3.94459	7.99377e-05	0.00097583
AT5G32450	AT5G32450	762.348	-0.386689	0.097366	3.9715	7.1422e-05	0.000580675		AT5G32450	1115.4	-0.69489	0.0705069	-9.85563	6.48068e-23	1.1846e-20
AT5G33290	AT5G33290	131.582	-0.660197	0.193956	3.40384	0.00066446	0.00393328		AT5G33290	125.313	-0.473177	0.157606	-3.00228	0.00267965	0.0182958
AT5G35732	AT5G35732	32.5292	-0.874987	0.239331	3.65597	0.000256214	0.00174461		AT5G35732	87.0457	-1.44379	0.230378	-6.26706	3.67927e-10	1.5122e-08
AT5G39020	AT5G39020	122.727	-1.1394	0.216638	5.2595	1.4445e-07	2.52524e-06		AT5G39020	75.0392	-1.05787	0.267422	-3.95582	7.62721e-05	0.000937675
AT5G40450	AT5G40450	1930.32	-1.52156	0.21992	6.91871	4.55766e-12	2.02362e-10		AT5G40450	4756.35	-1.34697	0.0960482	-14.0239	1.11259e-44	9.27366e-42
AT5G41080	AT5G41080	15.9125	-0.936146	0.361494	2.58966	0.00960713	0.0358775		AT5G41080	224.535	-0.678798	0.152572	-4.44903	8.62588e-06	0.000138373
AT5G41260	AT5G41260	310.616	-0.621856	0.134725	4.61575	3.91672e-06	4.62925e-05		AT5G41260	687.974	-0.505841	0.0940937	-5.37593	7.61882e-08	1.99699e-06
AT5G41700	AT5G41700	5007.67	-0.356982	0.127062	2.80952	0.00496157	0.0208706		AT5G41700	3127.39	-0.330462	0.0835221	-3.95658	7.60317e-05	0.000935823
AT5G43060	AT5G43060	155.501	-0.451216	0.178451	2.52852	0.0114546	0.0411532		AT5G43060	1105.2	-0.344636	0.124699	-2.76373	0.00571439	0.0335427
AT5G44020	AT5G44020	990.375	-2.14472	0.23747	9.03154	1.69269e-19	2.76184e-17		AT5G44020	5759.06	-0.779557	0.0998778	-7.80511	5.94494e-15	4.65717e-13
AT5G44680	AT5G44680	860.309	-1.12034	0.226744	4.94099	7.77285e-07	1.114e-05		AT5G44680	1845.08	-0.492676	0.15027	-3.2786	0.00104324	0.00847858
AT5G45490	AT5G45490	661.19	-0.535745	0.116621	4.59388	4.35076e-06	5.07648e-05		AT5G45490	752.142	-0.289278	0.0813745	-3.5549	0.000378125	0.00370969
AT5G45650	AT5G45650	733.31	-0.471009	0.145577	3.23547	0.00121443	0.00652539		AT5G45650	831.298	-0.689508	0.102007	-6.75944	1.38531e-11	6.87311e-10
AT5G46250	AT5G46250	1527.36	-0.717076	0.12848	5.58123	2.38825e-08	5.01883e-07		AT5G46250	1505.12	-0.190255	0.0656701	-2.89714	0.00376581	0.0239761
AT5G46330	AT5G46330	440.916	-0.977364	0.229668	4.25554	2.08543e-05	0.000200924		AT5G46330	377.548	-0.662004	0.126095	-5.25005	1.5206e-07	3.76309e-06
AT5G46760	AT5G46760	1010.02	-0.246898	0.0944991	2.6127	0.00898309	0.0339003		AT5G46760	933.916	-0.250565	0.0716223	-3.49841	0.000468033	0.00441506
AT5G46780	AT5G46780	185.08	-0.614823	0.132992	4.623	3.78227e-06	4.4862e-05		AT5G46780	207.914	-0.882767	0.121165	-7.28568	3.20043e-13	1.97309e-11
AT5G46790	AT5G46790	298.787	-0.305661	0.104397	2.92788	0.00341286	0.0153227		AT5G46790	480.9	-0.692837	0.101726	-6.81082	9.70429e-12	4.92015e-10
AT5G47180	AT5G47180	132.071	-0.441431	0.180255	2.44892	0.0143284	0.0491717		AT5G47180	271.078	-0.392902	0.104967	-3.74308	0.000181779	0.00198424
AT5G47770	AT5G47770	969.949	-0.482887	0.10859	4.44687	8.71323e-06	9.25706e-05		AT5G47770	1844.73	-0.281866	0.0665239	-4.23706	2.26464e-05	0.000325901
AT5G47780	AT5G47780	1127.39	-0.2012	0.0647118	3.10917	0.00187612	0.00936848		AT5G47780	1576.45	-0.313712	0.0722506	-4.342	1.41193e-05	0.000213822
AT5G49360	AT5G49360	1077.7	-1.21122	0.348182	3.47869	0.000503866	0.00309617		AT5G49360	8096.4	-0.460017	0.130482	-3.52553	0.00042263	0.00405841
AT5G49760	AT5G49760	1808.54	-0.374534	0.137556	2.72277	0.00647375	0.0259273		AT5G49760	2013.92	-0.40114	0.0758484	-5.28871	1.23185e-07	3.11144e-06
AT5G51550	AT5G51550	474.947	-0.728652	0.134416	5.42085	5.93157e-08	1.13049e-06		AT5G51550	2376.83	-0.673525	0.141696	-4.75332	2.00101e-06	3.82893e-05
AT5G52882	AT5G52882	151.41	-1.191	0.229595	5.1874	2.13245e-07	3.56932e-06		AT5G52882	1540.07	-1.61428	0.147398	-10.9518	6.51232e-28	1.6963e-25
AT5G53550	AT5G53550	619.586	-0.937546	0.257027	3.64766	0.000264643	0.00179187		AT5G53550	563.993	-0.493102	0.0815563	-6.04615	1.48346e-09	5.53984e-08
AT5G53880	AT5G53880	287.39	-0.830976	0.174792	4.7541	1.99333e-06	2.53995e-05		AT5G53880	1064	-0.597253	0.0990032	-6.03266	1.61278e-09	5.97993e-08
AT5G54380	AT5G54380	300.235	-1.00849	0.124843	8.07806	6.58027e-16	5.8176e-14		AT5G54380	1057.9	-0.521212	0.167831	-3.10557	0.0018991	0.0137742
AT5G55930	AT5G55930	80.6081	-1.64637	0.238881	6.892	5.50148e-12	2.42125e-10		AT5G55930	266.224	-1.75185	0.127548	-13.7349	6.27701e-43	4.84446e-40
AT5G56040	AT5G56040	266.387	-0.974145	0.126984	7.6714	1.70124e-14	1.17327e-12		AT5G56040	605.592	-0.407581	0.140206	-2.907	0.0036491	0.0234619
AT5G56840	AT5G56840	16.1361	-1.21002	0.334593	3.61639	0.000298742	0.00198788		AT5G56840	34.6711	-1.64239	0.311912	-5.26554	1.39774e-07	3.48816e-06
AT5G57130	AT5G57130	133.427	-0.716948	0.192063	3.73288	0.000189302	0.00134815		AT5G57130	355.375	-0.299908	0.106782	-2.8086	0.00497572	0.0300099
AT5G57550	AT5G57550	6.03671	-1.27555	0.376068	3.3918	0.000694363	0.0040651		AT5G57550	48.8212	-1.32785	0.442936	-2.99784	0.00271899	0.0185145
AT5G57940	AT5G57940	878.3	-0.568287	0.0725088	7.83749	4.59633e-15	3.54784e-13		AT5G57940	983.852	-0.50531	0.0656191	-7.70065	1.35374e-14	1.00747e-12
AT5G58787	AT5G58787	182.439	-1.13356	0.178715	6.34283	2.25581e-10	7.33742e-09		AT5G58787	239.784	-0.305091	0.116534	-2.61805	0.00884336	0.0475801
AT5G60270	AT5G60270	60.618	-0.656967	0.267609	2.45495	0.0140903	0.0485374		AT5G60270	96.9865	-0.630266	0.186005	-3.38844	0.000702914	0.00618813
AT5G60490	AT5G60490	63.8506	-0.893464	0.299811	2.98009	0.0028816	0.0133562		AT5G60490	88.193	-0.625525	0.171682	-3.64351	0.000268949	0.0027771
AT5G60710	AT5G60710	292.655	-0.480968	0.139817	3.43997	0.000581769	0.00350627		AT5G60710	773.251	-0.50691	0.0836299	-6.06135	1.34985e-09	5.07811e-08
AT5G61590	AT5G61590	357.715	-1.3428	0.269672	4.97938	6.37867e-07	9.37141e-06		AT5G61590	1197.02	-1.21335	0.123267	-9.8433	7.32692e-23	1.32764e-20
AT5G62670	AT5G62670	1505.11	-0.35318	0.109762	3.21768	0.00129231	0.00686119		AT5G62670	2164.41	-0.585631	0.0842212	-6.95349	3.56351e-12	1.8943e-10
AT5G62730	AT5G62730	12.7981	-2.08765	0.377654	5.52795	3.23991e-08	6.58782e-07		AT5G62730	10.2916	-1.71353	0.58459	-2.93118	0.00337682	0.022035
AT5G64410	AT5G64410	342.241	-1.28824	0.212165	6.0719	1.26409e-09	3.47998e-08		AT5G64410	686.069	-0.293972	0.107671	-2.73028	0.006328	0.0364764
AT5G64570	AT5G64570	94.4684	-0.677718	0.199768	3.39252	0.000692528	0.0040568		AT5G64570	725.818	-1.26929	0.121679	-10.4315	1.78035e-25	3.86447e-23
AT5G64620	AT5G64620	52.7197	-1.21313	0.262568	4.62026	3.83253e-06	4.53508e-05		AT5G64620	338.128	-0.619552	0.218495	-2.83555	0.00457472	0.0281786
AT5G64850	AT5G64850	549.852	-0.383384	0.123559	3.10283	0.00191677	0.00951226		AT5G64850	659.817	-0.670517	0.121402	-5.52309	3.33088e-08	9.44338e-07
AT5G65207	AT5G65207	69.5437	-0.816109	0.312513	2.61144	0.00901617	0.0339995		AT5G65207	457.06	-0.555235	0.18811	-2.95165	0.0031608	0.0208952
AT5G65240	AT5G65240	136.214	-0.401004	0.154878	2.58916	0.00962108	0.0359095		AT5G65240	195.834	-0.377513	0.129959	-2.90487	0.00367406	0.0235933
AT5G65390	AT5G65390	8.10664	-1.1487	0.38047	3.01917	0.00253466	0.0120341		AT5G65390	274.316	-2.0267	0.376548	-5.38231	7.35356e-08	1.93477e-06
AT5G65430	AT5G65430	1179.53	-0.368082	0.0864471	4.25789	2.06363e-05	0.000199206		AT5G65430	1915.09	-0.568827	0.0908856	-6.25872	3.88161e-10	1.5891e-08
AT5G65440	AT5G65440	578.913	-0.444842	0.0950953	4.67785	2.89897e-06	3.54752e-05		AT5G65440	890.685	-0.255736	0.0743392	-3.44012	0.00058146	0.00527721
AT5G65450	AT5G65450	145.655	-0.476205	0.149597	3.18326	0.00145629	0.00758534		AT5G65450	258.788	-0.691943	0.116958	-5.91615	3.29555e-09	1.15223e-07
AT5G65730	AT5G65730	743.775	-1.37512	0.221543	6.20703	5.39968e-10	1.62957e-08		AT5G65730	2181.15	-0.970425	0.130884	-7.41441	1.22169e-13	7.93068e-12
AT5G65970	AT5G65970	24.9116	-0.994476	0.275114	3.61478	0.000300604	0.00199686		AT5G65970	143.141	-0.791883	0.1466	-5.40167	6.60248e-08	1.75935e-06
AT5G67411	AT5G67411	13.6192	-1.66126	0.355674	4.67073	3.00124e-06	3.65485e-05		AT5G67411	16.0558	-1.37215	0.400525	-3.42589	0.00061279	0.00551829

## Sheet: KEGG-co-upregulated genes
Category	Term % PValue Genes List Total Pop Hits Pop Total Fold Enrichment Bonferroni Benjamini FDR		Count	%	Pvalue
ath01110	Biosynthesis of secondary metabolites		88	16.826	3.00237e-17
ath01100	Metabolic pathways		118	22.5621	1.76667e-13
ath00010	Glycolysis / Gluconeogenesis		17	3.25048	4.18162e-07
ath00500	Starch and sucrose metabolism		19	3.63289	3.05095e-06
ath00710	Carbon fixation in photosynthetic organisms		12	2.29446	5.49349e-06
ath01200	Carbon metabolism		23	4.39771	1.9476e-05
ath01230	Biosynthesis of amino acid		19	3.63289	0.000359976
ath00906	Carotenoid biosynthesis		6	1.14723	0.00157036
ath00270	Cysteine and methionine metabolism		11	2.10325	0.00407426
ath00860	Porphyrin metabolism		7	1.33843	0.00494684
ath00330	Arginine and proline metabolism		7	1.33843	0.00542909
ath00130	Ubiquinone and other terpenoid-quinone biosynthesis		6	1.14723	0.00597098
ath00030	Pentose phosphate pathway		7	1.33843	0.00770702
ath00450	Selenocompound metabolism		4	0.764818	0.0158904
ath00280	Valine, leucine and isoleucine degradation		6	1.14723	0.0197034
ath00620	Pyruvate metabolism		8	1.52964	0.0268678
ath01250	Biosynthesis of nucleotide sugars		8	1.52964	0.0310779
ath01240	Biosynthesis of cofactors		13	2.48566	0.0528685
ath00310	Lysine degradation		4	0.764818	0.0659057
ath00630	Glyoxylate and dicarboxylate metabolism		6	1.14723	0.0863841
ath00480	Glutathione metabolism		7	0.0909826	0.0909826

## Sheet: GO-co-upregulated genes
Category	Term	Count	%	PValue	Genes	List Total	Pop Hits	Pop Total	Fold Enrichment	Bonferroni	Benjamini	FDR
GOTERM_BP_DIRECT	GO:0009416~response to light stimulus	85	16.2524	1.78772e-23	AT1G64950, AT4G27520, AT3G29575, AT2G35960, AT5G23890, AT5G60680, AT2G36530, AT4G27560, AT5G15910, AT1G28610, AT1G01250, AT4G38810, AT4G29590, AT5G01260, AT1G72770, AT3G48200, AT1G76570, AT4G15490, AT2G42770, AT4G34650, AT4G35300, AT5G02830, AT5G39590, AT1G58280, AT4G06536, AT5G43150, AT1G09490, AT4G01883, AT5G25220, AT4G32920, AT1G18660, AT4G28660, AT4G22240, AT3G11090, AT5G04140, AT1G75210, AT5…	503	1109	22636	3.44921	1.40873e-20	1.40873e-20	1.36225e-20
GOTERM_BP_DIRECT	GO:0009414~response to water deprivation	70	13.3843	1.19562e-17	AT3G05640, AT5G67030, AT2G39800, AT4G27520, AT3G29575, AT3G06010, AT1G29670, AT5G60680, AT3G12490, AT5G59320, AT1G02820, AT1G01250, AT4G38810, AT1G79520, AT3G63520, AT1G72770, AT2G05620, AT3G50970, AT3G48240, AT4G34650, AT5G39590, AT2G31570, AT4G06534, AT4G32920, AT3G56080, AT2G16990, AT1G69295, AT4G25670, AT3G14440, AT2G42540, AT2G23120, AT1G73390, AT2G36630, AT3G57540, AT5G52310, AT5G66400, AT4…	503	981	22636	3.21115	9.4215e-15	4.71075e-15	4.55532e-15
GOTERM_BP_DIRECT	GO:0009409~response to cold	37	7.07457	9.38432e-12	AT3G29575, AT3G06510, AT3G05880, AT1G05140, AT5G52310, AT1G29670, AT4G35090, AT5G15970, AT2G33380, AT4G25480, AT4G09650, AT2G36530, AT2G37760, AT4G04020, AT2G18790, AT3G12490, AT5G54470, AT4G26080, AT1G78610, AT5G08650, AT3G50970, AT2G42530, AT2G42770, AT1G23740, AT2G45660, AT1G78070, AT4G24960, AT1G35720, AT3G60520, AT4G25670, AT2G37770, AT4G39730, AT3G47520, AT1G53240, AT4G31990, AT2G42200, AT2…	503	429	22636	3.88129	7.39481e-09	2.46495e-09	2.38362e-09
GOTERM_BP_DIRECT	GO:0009737~response to abscisic acid	57	10.8987	8.54944e-11	AT2G39800, AT4G27520, AT3G29575, AT3G05880, AT2G33380, AT2G36530, AT4G16146, AT5G59320, AT1G01250, AT1G79520, AT4G26080, AT1G54100, AT2G42530, AT3G50970, AT5G52050, AT1G80110, AT1G65690, AT2G16990, AT1G69295, AT2G37870, AT1G75210, AT2G42540, AT2G23120, AT4G01870, AT1G33110, AT3G57540, AT5G52310, AT5G66400, AT2G15970, AT5G15970, AT1G69260, AT4G04020, AT3G14690, AT1G20030, AT4G28080, AT1G78610, AT2…	503	977	22636	2.6255	6.73696e-08	1.68424e-08	1.62867e-08
GOTERM_BP_DIRECT	GO:0015994~chlorophyll metabolic process	11	2.10325	9.9581e-08	AT1G57770, AT1G06690, AT3G26310, AT4G27700, AT2G21960, AT4G36390, AT5G38520, AT5G66530, AT5G01410, AT1G22850, AT4G32770	503	49	22636	10.1025	7.84667e-05	1.5694e-05	1.51761e-05
GOTERM_BP_DIRECT	GO:0046686~response to cadmium ion	26	4.97132	1.23001e-07	AT3G03780, AT2G35840, AT1G13440, AT3G55440, AT5G17310, AT1G70730, AT3G60750, AT1G23190, AT2G36530, AT3G19170, AT2G37760, AT2G41380, AT1G17290, AT3G04120, AT5G52920, AT5G23120, AT3G52880, AT4G11600, AT5G16970, AT1G35720, AT1G13930, AT1G53240, AT4G31990, AT5G42740, AT3G08590, AT3G48990	503	332	22636	3.52425	9.69203e-05	1.61542e-05	1.56212e-05
GOTERM_BP_DIRECT	GO:0009642~response to light intensity	20	3.82409	1.23572e-06	AT4G01870, AT2G30150, AT2G36835, AT4G06534, AT1G29670, AT1G18660, AT3G21670, AT1G73920, AT1G73990, AT3G45600, AT2G45630, AT4G38810, AT2G45600, AT1G79520, AT4G37270, AT1G72770, AT5G08650, AT1G15060, AT3G48240, AT2G23120	503	233	22636	3.86283	0.000973278	0.000139107	0.000134517
GOTERM_BP_DIRECT	GO:0006096~glycolytic process	11	2.10325	1.57935e-06	AT4G26530, AT3G04120, AT5G52920, AT5G08570, AT1G13440, AT4G24620, AT5G50850, AT3G55440, AT5G42740, AT3G08590, AT2G36530	503	65	22636	7.61572	0.00124376	0.000155566	0.000150433
GOTERM_BP_DIRECT	GO:0006094~gluconeogenesis	7	1.33843	1.42868e-05	AT4G26530, AT3G04120, AT1G13440, AT4G24620, AT3G55440, AT5G42740, AT3G55800	503	25	22636	12.6006	0.011195	0.00125089	0.00120962
GOTERM_BP_DIRECT	GO:0009658~chloroplast organization	17	3.25048	1.65867e-05	AT5G42480, AT3G56940, AT1G62750, AT5G17790, AT5G15450, AT5G42310, AT4G23940, AT2G16365, AT5G08050, AT3G23400, AT3G57180, AT5G64050, AT1G30610, AT3G15354, AT1G44000, AT3G47520, AT5G59220	503	207	22636	3.69582	0.0129854	0.00130703	0.0012639
GOTERM_BP_DIRECT	GO:0006970~response to osmotic stress	22	4.2065	4.43811e-05	AT4G01870, AT5G67030, AT1G78070, AT5G52310, AT1G80110, AT1G18660, AT1G35720, AT5G15970, AT1G73920, AT1G65690, AT5G60680, AT2G16990, AT1G01250, AT1G20030, AT3G14440, AT1G79520, AT3G10340, AT1G10090, AT4G34650, AT2G42540, AT5G57050, AT4G33550	503	352	22636	2.81262	0.0343686	0.0031793	0.0030744
GOTERM_BP_DIRECT	GO:0071482~cellular response to light stimulus	8	1.52964	5.53478e-05	AT3G27350, AT1G07180, AT3G15354, AT2G36390, AT5G08740, AT1G64860, AT2G46735, AT2G37240	503	45	22636	8.00035	0.0426778	0.00363451	0.00351459
GOTERM_BP_DIRECT	GO:0009651~response to salt stress	29	5.54493	6.16354e-05	AT1G64950, AT1G10370, AT2G39800, AT3G29575, AT4G27520, AT3G06010, AT3G57540, AT5G52310, AT5G14640, AT2G33380, AT3G57180, AT2G37760, AT3G14690, AT1G02820, AT1G27760, AT1G72770, AT1G54100, AT1G47510, AT5G19440, AT1G35720, AT1G13930, AT4G25670, AT2G37770, AT4G39730, AT5G61820, AT5G59310, AT2G42540, AT5G01410, AT4G34000	503	560	22636	2.33046	0.0474095	0.00365915	0.00353841
GOTERM_BP_DIRECT	GO:0009639~response to red or far red light	14	2.67686	6.50102e-05	AT3G27350, AT5G20220, AT1G58520, AT1G18660, AT1G70610, AT3G21670, AT3G14690, AT3G15354, AT1G79520, AT2G46735, AT3G48240, AT1G73480, AT3G48690, AT1G64900	503	161	22636	3.91322	0.0499396	0.00365915	0.00353841
GOTERM_BP_DIRECT	GO:0006979~response to oxidative stress	26	4.97132	8.51486e-05	AT1G64950, AT2G39800, AT1G13440, AT5G20140, AT5G16980, AT4G35090, AT3G17070, AT3G12490, AT4G12000, AT1G53670, AT5G50350, AT4G35000, AT4G32770, AT2G31570, AT3G04120, AT5G16990, AT4G11600, AT5G16970, AT1G35720, AT1G11210, AT4G28660, AT5G53050, AT5G28030, AT1G10090, AT5G55070, AT5G01410	503	482	22636	2.42749	0.0648983	0.00433927	0.00419609
GOTERM_BP_DIRECT	GO:0008610~lipid biosynthetic process	16	3.05927	8.8107e-05	AT2G30150, AT5G43150, AT2G32430, AT4G03200, AT5G19850, AT1G19650, AT5G25360, AT4G28660, AT1G02205, AT1G75210, AT2G46735, AT5G08415, AT4G34650, AT1G22850, AT1G58270, AT3G10840	503	213	22636	3.38043	0.0670758	0.00433927	0.00419609
GOTERM_BP_DIRECT	GO:0009738~abscisic acid-activated signaling pathway	18	3.44168	0.000106289	AT1G64950, AT3G29575, AT1G78070, AT4G32920, AT1G73920, AT1G65690, AT4G25670, AT1G69260, AT5G61820, AT4G26080, AT1G72770, AT2G26980, AT2G46680, AT4G34650, AT5G57050, AT1G73390, AT4G34000, AT5G39590	503	267	22636	3.03384	0.0803482	0.0049268	0.00476424
GOTERM_BP_DIRECT	GO:0044255~cellular lipid metabolic process	15	2.86807	0.000129361	AT5G43150, AT4G03200, AT5G19850, AT2G37240, AT1G19650, AT3G21670, AT5G25360, AT4G28660, AT1G20030, AT1G75210, AT5G65840, AT5G08415, AT5G37360, AT1G22850, AT1G58270	503	196	22636	3.44403	0.0969191	0.00566314	0.00547629
GOTERM_BP_DIRECT	GO:0019252~starch biosynthetic process	7	1.33843	0.000174455	AT5G19220, AT5G24300, AT2G36390, AT3G01180, AT3G58560, AT3G55800, AT2G21590	503	38	22636	8.28984	0.12845	0.00723528	0.00699655
GOTERM_BP_DIRECT	GO:0016120~carotene biosynthetic process	4	0.764818	0.000355075	AT3G04870, AT3G10230, AT3G03710, AT5G57030	503	7	22636	25.7154	0.244102	0.01399	0.0135284
GOTERM_BP_DIRECT	GO:0016123~xanthophyll biosynthetic process	4	0.764818	0.000558767	AT5G67030, AT3G10230, AT3G03710, AT5G57030	503	8	22636	22.501	0.356241	0.0209671	0.0202753
GOTERM_BP_DIRECT	GO:0010189~vitamin E biosynthetic process	4	0.764818	0.000824367	AT1G64970, AT5G53970, AT1G74470, AT4G32770	503	9	22636	20.0009	0.477886	0.0295273	0.0285531
GOTERM_BP_DIRECT	GO:0015979~photosynthesis	11	2.10325	0.000875676	AT3G56940, AT2G18790, AT1G77090, AT5G47110, AT5G23120, AT4G34190, AT1G44575, AT1G74470, AT4G09650, AT4G14690, AT4G28660	503	135	22636	3.66683	0.498592	0.0300014	0.0290115
GOTERM_BP_DIRECT	GO:0010205~photoinhibition	4	0.764818	0.00156656	AT5G42270, AT4G30950, AT5G57050, AT4G04020	503	11	22636	16.3644	0.709286	0.0507065	0.0490334
GOTERM_BP_DIRECT	GO:0042538~hyperosmotic salinity response	7	1.33843	0.00160871	AT2G39800, AT3G05880, AT3G55610, AT4G24960, AT3G14440, AT5G52310, AT5G01410	503	57	22636	5.52656	0.718798	0.0507065	0.0490334
GOTERM_BP_DIRECT	GO:0006006~glucose metabolic process	5	0.956023	0.0017853	AT3G04120, AT1G13440, AT1G70730, AT1G12900, AT1G23190	503	24	22636	9.37541	0.755386	0.0541084	0.0523231
GOTERM_BP_DIRECT	GO:0009269~response to desiccation	5	0.956023	0.00242545	AT2G39800, AT1G01470, AT1G54100, AT5G52310, AT2G33380	503	26	22636	8.65423	0.852448	0.0707873	0.0684516
GOTERM_BP_DIRECT	GO:0044283~small molecule biosynthetic process	6	1.14723	0.00279997	AT5G19850, AT5G04440, AT5G01260, AT2G37240, AT3G21670, AT1G73480	503	44	22636	6.13663	0.890241	0.0787991	0.0761991
GOTERM_BP_DIRECT	GO:0055085~transmembrane transport	18	3.44168	0.00386951	AT5G20380, AT1G67300, AT5G17860, AT5G26200, AT1G70610, AT3G21670, AT2G16990, AT3G62700, AT4G25450, AT3G46980, AT1G78610, AT1G79410, AT4G17340, AT2G47490, AT2G26690, AT4G35300, AT4G17550, AT5G39040	503	369	22636	2.19522	0.952881	0.102986	0.0995875
GOTERM_BP_DIRECT	GO:0007623~circadian rhythm	9	1.72084	0.00392077	AT2G21320, AT5G64170, AT4G26700, AT3G01060, AT5G52310, AT2G16365, AT2G46790, AT2G42540, AT3G52180	503	114	22636	3.55279	0.954754	0.102986	0.0995875
GOTERM_BP_DIRECT	GO:0005982~starch metabolic process	4	0.764818	0.00489607	AT4G24620, AT2G36390, AT4G02280, AT3G52180	503	16	22636	11.2505	0.979091	0.124455	0.120349
GOTERM_BP_DIRECT	GO:0010035~response to inorganic substance	28	5.35373	0.00519685	AT4G01870, AT1G64950, AT1G06690, AT2G37240, AT5G66120, AT4G21580, AT3G14690, AT3G14650, AT4G36390, AT5G01260, AT5G66720, AT5G59480, AT4G15490, AT4G15550, AT2G42770, AT4G35300, AT5G19440, AT1G57770, AT5G17560, AT1G80110, AT5G20070, AT5G66530, AT4G28660, AT3G14660, AT5G65840, AT1G04690, AT5G35180, AT1G64900	503	713	22636	1.76726	0.983523	0.127972	0.12375
GOTERM_BP_DIRECT	GO:1901575~organic substance catabolic process	12	2.29446	0.00719711	AT2G45630, AT3G03770, AT5G23890, AT3G26310, AT3G56140, AT1G18660, AT1G70610, AT1G10090, AT5G20070, AT4G15550, AT3G48690, AT5G15910	503	209	22636	2.58385	0.996627	0.171858	0.166188
GOTERM_BP_DIRECT	GO:0009408~response to heat	12	2.29446	0.00770764	AT5G67030, AT3G04120, AT1G13440, AT3G06010, AT1G80030, AT4G26080, AT5G15450, AT1G35720, AT1G73480, AT5G57050, AT1G13930, AT2G22360	503	211	22636	2.55935	0.997751	0.175721	0.169923
GOTERM_BP_DIRECT	GO:0080167~response to karrikin	9	1.72084	0.00780486	AT1G10370, AT5G05270, AT3G55120, AT3G61220, AT1G05680, AT1G06550, AT1G44575, AT2G16365, AT5G08050	503	128	22636	3.1642	0.997918	0.175721	0.169923
GOTERM_BP_DIRECT	GO:0009636~response to toxic substance	5	0.956023	0.00803003	AT4G37270, AT4G15550, AT2G36750, AT2G37760, AT2G37770	503	36	22636	6.25028	0.998259	0.175768	0.169969
GOTERM_BP_DIRECT	GO:0006744~ubiquinone biosynthetic process	4	0.764818	0.00933408	AT1G19140, AT3G10230, AT1G78140, AT5G57030	503	20	22636	9.0004	0.999382	0.188596	0.182374
GOTERM_BP_DIRECT	GO:0015996~chlorophyll catabolic process	4	0.764818	0.00933408	AT4G37000, AT1G44000, AT3G44880, AT4G16690	503	20	22636	9.0004	0.999382	0.188596	0.182374
GOTERM_BP_DIRECT	GO:0006875~cellular metal ion homeostasis	4	0.764818	0.00933408	AT5G06220, AT2G23150, AT1G70610, AT4G15550	503	20	22636	9.0004	0.999382	0.188596	0.182374
GOTERM_BP_DIRECT	GO:0010021~amylopectin biosynthetic process	3	0.573614	0.00957376	AT5G24300, AT2G36390, AT3G01180	503	7	22636	19.2866	0.99949	0.188603	0.18238
GOTERM_BP_DIRECT	GO:0019253~reductive pentose-phosphate cycle	4	0.764818	0.0107131	AT3G04790, AT3G60750, AT1G12900, AT3G55800	503	21	22636	8.57181	0.999794	0.205901	0.199107
GOTERM_BP_DIRECT	GO:0005975~carbohydrate metabolic process	18	3.44168	0.0109846	AT3G06510, AT4G03200, AT4G27830, AT1G70730, AT3G62740, AT4G23500, AT1G23190, AT5G66530, AT2G36870, AT5G57330, AT3G61490, AT2G36390, AT3G47520, AT1G48100, AT3G15020, AT1G53240, AT1G69830, AT2G41540	503	412	22636	1.96611	0.999834	0.206041	0.199243
GOTERM_BP_DIRECT	GO:0044248~cellular catabolic process	19	3.63289	0.0112434	AT4G01870, AT1G64950, AT5G19850, AT5G23890, AT3G26310, AT3G56140, AT1G70610, AT5G20070, AT5G66120, AT5G15910, AT3G14690, AT1G79520, AT5G08415, AT1G04690, AT1G10090, AT2G27950, AT4G15550, AT2G23120, AT3G48690	503	446	22636	1.91713	0.999865	0.206041	0.199243
GOTERM_BP_DIRECT	GO:0006721~terpenoid metabolic process	5	0.956023	0.0116253	AT2G32640, AT4G06534, AT1G79520, AT5G08650, AT2G46735	503	40	22636	5.62525	0.9999	0.208198	0.201329
GOTERM_BP_DIRECT	GO:0009631~cold acclimation	6	1.14723	0.0120693	AT2G15970, AT5G66400, AT2G42530, AT3G50970, AT4G25480, AT2G42540	503	62	22636	4.35503	0.99993	0.210383	0.203442
GOTERM_BP_DIRECT	GO:0010150~leaf senescence	11	2.10325	0.0124202	AT4G01870, AT2G31570, AT3G15030, AT5G17860, AT1G79520, AT5G52310, AT4G16690, AT1G09500, AT2G42530, AT5G59220, AT2G42540	503	196	22636	2.52562	0.999947	0.210383	0.203442
GOTERM_BP_DIRECT	GO:0043436~oxoacid metabolic process	14	2.67686	0.0125482	AT4G01870, AT2G36630, AT5G26200, AT3G56140, AT4G21580, AT4G22240, AT5G02480, AT1G01250, AT4G29590, AT5G65840, AT1G10090, AT3G26290, AT1G64900, AT5G39590	503	288	22636	2.1876	0.999952	0.210383	0.203442
GOTERM_BP_DIRECT	GO:0005978~glycogen biosynthetic process	3	0.573614	0.0159372	AT5G19220, AT2G36390, AT2G21590	503	9	22636	15.0007	0.999997	0.25919	0.250638
GOTERM_BP_DIRECT	GO:0042440~pigment metabolic process	5	0.956023	0.0161172	AT1G06690, AT3G26310, AT4G27700, AT2G37240, AT1G22850	503	44	22636	5.11386	0.999997	0.25919	0.250638
GOTERM_BP_DIRECT	GO:0010224~response to UV-B	6	1.14723	0.0195717	AT3G55120, AT5G17780, AT2G46370, AT4G14690, AT5G01410, AT2G36750	503	70	22636	3.85731	1	0.297498	0.287682
GOTERM_BP_DIRECT	GO:0010239~chloroplast mRNA processing	3	0.573614	0.0196319	AT5G42310, AT2G35130, AT1G30610	503	10	22636	13.5006	1	0.297498	0.287682
GOTERM_BP_DIRECT	GO:0009772~photosynthetic electron transport in photosystem II	3	0.573614	0.0196319	AT4G09650, AT4G01050, AT2G45770	503	10	22636	13.5006	1	0.297498	0.287682
GOTERM_BP_DIRECT	GO:0009644~response to high light intensity	5	0.956023	0.020112	AT1G01470, AT4G34190, AT2G05620, AT2G42540, AT4G32770	503	47	22636	4.78745	1	0.299023	0.289157
GOTERM_BP_DIRECT	GO:0006508~proteolysis	9	1.72084	0.0257671	AT1G73990, AT4G01870, AT5G42270, AT2G21960, AT1G20160, AT4G23940, AT1G68660, AT3G48350, AT3G19170	503	159	22636	2.54728	1	0.370242	0.358026
GOTERM_BP_DIRECT	GO:0016117~carotenoid biosynthetic process	4	0.764818	0.0258418	AT3G11945, AT3G04870, AT3G10230, AT5G57030	503	29	22636	6.20717	1	0.370242	0.358026
GOTERM_BP_DIRECT	GO:0019748~secondary metabolic process	15	2.86807	0.0355367	AT1G64950, AT5G19440, AT2G36630, AT1G33110, AT4G21580, AT4G22240, AT3G14690, AT5G61820, AT5G65840, AT4G15490, AT3G48690, AT1G73390, AT1G64900, AT1G58280, AT4G33550	503	367	22636	1.83932	1	0.500052	0.483553
GOTERM_BP_DIRECT	GO:0044281~small molecule metabolic process	11	2.10325	0.0366419	AT3G14690, AT1G64950, AT5G19440, AT5G61820, AT1G57770, AT5G57960, AT5G09760, AT2G46735, AT5G20070, AT4G15490, AT1G73390	503	234	22636	2.11548	1	0.506558	0.489844
GOTERM_BP_DIRECT	GO:0005986~sucrose biosynthetic process	3	0.573614	0.037452	AT2G35840, AT3G58560, AT3G55800	503	14	22636	9.64328	1	0.508831	0.492042
GOTERM_BP_DIRECT	GO:0009637~response to blue light	7	1.33843	0.0387014	AT3G27350, AT5G20220, AT2G36630, AT5G26200, AT2G46735, AT3G08590, AT5G20070	503	112	22636	2.81262	1	0.516893	0.499838
GOTERM_BP_DIRECT	GO:0009688~abscisic acid biosynthetic process	3	0.573614	0.0479768	AT5G67030, AT2G27150, AT3G14440	503	16	22636	8.43787	1	0.619766	0.599317
GOTERM_BP_DIRECT	GO:0009086~methionine biosynthetic process	3	0.573614	0.0479768	AT3G03780, AT4G19710, AT5G21060	503	16	22636	8.43787	1	0.619766	0.599317
GOTERM_BP_DIRECT	GO:0015995~chlorophyll biosynthetic process	5	0.956023	0.051131	AT3G56940, AT3G16520, AT2G40400, AT3G03710, AT1G74470	503	63	22636	3.57159	1	0.645608	0.624306
GOTERM_BP_DIRECT	GO:0042631~cellular response to water deprivation	4	0.764818	0.0516159	AT1G64660, AT1G79410, AT2G15970, AT1G05680	503	38	22636	4.73705	1	0.645608	0.624306
GOTERM_BP_DIRECT	GO:0009266~response to temperature stimulus	8	1.52964	0.053122	AT2G18790, AT4G27520, AT2G41190, AT1G09310, AT5G60680, AT2G46790, AT2G23120, AT4G32770	503	152	22636	2.36853	1	0.649724	0.628286
GOTERM_BP_DIRECT	GO:0098656~anion transmembrane transport	3	0.573614	0.053594	AT3G01280, AT5G47560, AT2G16990	503	17	22636	7.94153	1	0.649724	0.628286
GOTERM_BP_DIRECT	GO:0048507~meristem development	8	1.52964	0.0610863	AT3G30300, AT3G11090, AT3G03770, AT5G61960, AT3G62740, AT2G25320, AT5G08710, AT5G63780	503	157	22636	2.29309	1	0.692353	0.669509
GOTERM_BP_DIRECT	GO:0065003~macromolecular complex assembly	8	1.52964	0.064466	AT5G23120, AT5G65840, AT5G66530, AT1G09310, AT5G05740, AT4G28660, AT1G64900, AT5G59350	503	159	22636	2.26425	1	0.692353	0.669509
GOTERM_BP_DIRECT	GO:0042744~hydrogen peroxide catabolic process	6	1.14723	0.064755	AT3G52880, AT4G35090, AT3G17070, AT3G27820, AT4G35000, AT2G41680	503	97	22636	2.78363	1	0.692353	0.669509
GOTERM_BP_DIRECT	GO:0010028~xanthophyll cycle	2	0.382409	0.0650694	AT2G21860, AT4G00370	503	3	22636	30.0013	1	0.692353	0.669509
GOTERM_BP_DIRECT	GO:0055129~L-proline biosynthetic process	2	0.382409	0.0650694	AT2G39800, AT3G55610	503	3	22636	30.0013	1	0.692353	0.669509
GOTERM_BP_DIRECT	GO:0006108~malate metabolic process	3	0.573614	0.0654732	AT3G47520, AT3G15020, AT1G53240	503	19	22636	7.10558	1	0.692353	0.669509
GOTERM_BP_DIRECT	GO:0098869~cellular oxidant detoxification	3	0.573614	0.0654732	AT3G52880, AT4G11600, AT4G35000	503	19	22636	7.10558	1	0.692353	0.669509
GOTERM_BP_DIRECT	GO:0009773~photosynthetic electron transport in photosystem I	3	0.573614	0.0654732	AT2G05620, AT4G09650, AT2G01590	503	19	22636	7.10558	1	0.692353	0.669509
GOTERM_BP_DIRECT	GO:0010555~response to mannitol	3	0.573614	0.0654732	AT3G57540, AT5G52310, AT4G02280	503	19	22636	7.10558	1	0.692353	0.669509
GOTERM_BP_DIRECT	GO:0042128~nitrate assimilation	4	0.764818	0.0658966	AT2G15620, AT1G77760, AT3G21670, AT2G26690	503	42	22636	4.2859	1	0.692353	0.669509
GOTERM_BP_DIRECT	GO:0009970~cellular response to sulfate starvation	3	0.573614	0.0717109	AT1G64660, AT4G35090, AT1G19920	503	20	22636	6.7503	1	0.733873	0.709658
GOTERM_BP_DIRECT	GO:0016051~carbohydrate biosynthetic process	3	0.573614	0.0717109	AT3G60520, AT3G55800, AT1G15710	503	20	22636	6.7503	1	0.733873	0.709658
GOTERM_BP_DIRECT	GO:0009640~photomorphogenesis	5	0.956023	0.0728811	AT2G21320, AT2G18790, AT3G15354, AT1G58520, AT2G46370	503	71	22636	3.16915	1	0.736286	0.711992
GOTERM_BP_DIRECT	GO:0051453~regulation of intracellular pH	3	0.573614	0.0847245	AT1G79610, AT3G05030, AT5G47560	503	22	22636	6.13663	1	0.81627	0.789337
GOTERM_BP_DIRECT	GO:0005977~glycogen metabolic process	2	0.382409	0.0858062	AT5G17310, AT3G03250	503	4	22636	22.501	1	0.81627	0.789337
GOTERM_BP_DIRECT	GO:0071492~cellular response to UV-A	2	0.382409	0.0858062	AT4G34190, AT4G14690	503	4	22636	22.501	1	0.81627	0.789337
GOTERM_BP_DIRECT	GO:0031022~nuclear migration along microfilament	2	0.382409	0.0858062	AT5G10470, AT5G65460	503	4	22636	22.501	1	0.81627	0.789337
GOTERM_BP_DIRECT	GO:0045454~cell redox homeostasis	4	0.764818	0.0859777	AT3G24170, AT3G54660, AT4G35090, AT2G41680	503	47	22636	3.82996	1	0.81627	0.789337
GOTERM_BP_DIRECT	GO:0010030~positive regulation of seed germination	3	0.573614	0.0914786	AT3G48990, AT1G07430, AT4G14690	503	23	22636	5.86982	1	0.858156	0.829841
GOTERM_BP_DIRECT	GO:0046855~inositol phosphate dephosphorylation	3	0.573614	0.0983835	AT1G31190, AT1G47510, AT1G65580	503	24	22636	5.62525	1	0.912073	0.881979
GOTERM_CC_DIRECT	GO:0009507~chloroplast	252	48.1836	1.19907e-53	AT5G67030, AT3G03780, AT5G24300, AT3G04870, AT2G18940, AT5G14740, AT1G02820, AT1G18060, AT4G29590, AT3G44880, AT2G24820, AT1G20490, AT2G05620, AT3G48200, AT1G76050, AT5G17560, AT2G40400, AT1G58520, AT5G63100, AT5G48880, AT1G30610, AT2G36390, AT5G08740, AT3G14440, AT5G04140, AT5G01790, AT2G22190, AT1G44575, AT3G54900, AT2G45770, AT5G17790, AT5G42310, AT4G23940, AT4G04020, AT1G19920, AT2G41380, AT3…	509	5030	26013	2.56038	1.6787e-51	1.6787e-51	1.45088e-51
GOTERM_CC_DIRECT	GO:0009941~chloroplast envelope	65	12.4283	3.92743e-30	AT3G03780, AT5G67030, AT3G04870, AT5G23890, AT5G20140, AT3G04790, AT3G01280, AT5G14740, AT4G09650, AT4G01050, AT3G19170, AT4G37000, AT5G08690, AT3G44880, AT2G24820, AT5G03880, AT2G42530, AT1G74470, AT2G42770, AT2G22360, AT5G19220, AT4G24620, AT1G80030, AT5G23120, AT3G27820, AT1G13930, AT1G73990, AT5G04140, AT5G33320, AT4G31990, AT2G42540, AT1G77590, AT3G10840, AT3G54900, AT5G03900, AT5G42270, AT3…	509	568	26013	5.84841	5.4984e-28	2.7492e-28	2.37609e-28
GOTERM_CC_DIRECT	GO:0009570~chloroplast stroma	65	12.4283	6.8775e-25	AT5G24300, AT1G31190, AT3G04790, AT5G14660, AT5G14740, AT3G19170, AT2G20020, AT4G37000, AT1G17050, AT3G63520, AT3G10670, AT2G42530, AT2G41680, AT5G19220, AT4G24620, AT5G23120, AT2G15620, AT3G54660, AT3G03710, AT5G66530, AT4G28660, AT1G13930, AT5G45170, AT1G73990, AT2G36390, AT3G14440, AT5G04140, AT5G65840, AT4G31990, AT3G48990, AT2G42540, AT3G54900, AT2G45770, AT1G62750, AT5G17790, AT1G77090, AT3…	509	704	26013	4.7186	9.62849e-23	3.2095e-23	2.77392e-23
GOTERM_CC_DIRECT	GO:0005829~cytosol	140	26.7686	1.30336e-19	AT3G03780, AT2G35840, AT1G13440, AT5G14740, AT5G15950, AT2G36530, AT4G01050, AT4G21580, AT3G19170, AT2G18790, AT4G37000, AT3G12490, AT5G08570, AT1G02820, AT4G26080, AT4G36390, AT1G72770, AT3G44880, AT3G48200, AT2G42530, AT1G07430, AT2G42770, AT2G44310, AT2G41680, AT3G04120, AT4G24620, AT5G25220, AT5G16990, AT3G03710, AT1G65690, AT4G02890, AT3G45600, AT3G07480, AT5G13370, AT2G42540, AT2G45770, AT4…	509	3287	26013	2.17671	1.8247e-17	4.56176e-18	3.94266e-18
GOTERM_CC_DIRECT	GO:0009535~chloroplast thylakoid membrane	43	8.2218	2.8341e-17	AT5G42270, AT5G23890, AT1G06690, AT4G27700, AT5G20140, AT3G04790, AT5G14740, AT4G09650, AT4G01050, AT5G42070, AT4G04020, AT4G37000, AT3G44880, AT4G34190, AT2G05620, AT5G03880, AT1G76570, AT5G05740, AT1G74470, AT2G22360, AT3G56940, AT5G47110, AT5G23120, AT1G80030, AT5G23140, AT2G35490, AT2G34460, AT5G08050, AT3G23400, AT4G28660, AT4G22240, AT1G73990, AT4G39730, AT4G38100, AT4G09350, AT4G35250, AT3…	509	444	26013	4.94946	3.96775e-15	7.93549e-16	6.85853e-16
GOTERM_CC_DIRECT	GO:0009534~chloroplast thylakoid	32	6.11855	9.28671e-17	AT5G42270, AT1G77090, AT4G27700, AT5G20140, AT5G42310, AT1G29670, AT4G23940, AT4G09650, AT4G01050, AT4G04020, AT1G44000, AT3G44880, AT5G38520, AT2G05620, AT5G03880, AT1G74470, AT4G32770, AT3G56940, AT5G23120, AT2G35490, AT2G34460, AT5G08050, AT3G23400, AT2G38540, AT4G22240, AT1G73990, AT5G12860, AT4G35250, AT5G08740, AT2G21960, AT1G44575, AT2G45770	509	241	26013	6.78587	1.55431e-14	2.1669e-15	1.87282e-15
GOTERM_CC_DIRECT	GO:0009536~plastid	62	11.8547	1.59534e-15	AT5G67030, AT5G24300, AT5G20380, AT5G23890, AT5G20140, AT3G01280, AT5G14660, AT5G14740, AT5G15910, AT5G53580, AT1G17050, AT3G46980, AT2G42770, AT5G39590, AT5G47110, AT4G24620, AT5G23120, AT5G17560, AT5G16990, AT5G66530, AT5G21060, AT2G35490, AT4G22240, AT5G33320, AT5G65840, AT4G31990, AT5G37360, AT5G42740, AT1G44575, AT1G77590, AT5G35180, AT5G03900, AT5G42270, AT3G11945, AT3G06510, AT5G50850, AT5…	509	983	26013	3.22337	2.17604e-13	3.19068e-14	2.75766e-14
GOTERM_CC_DIRECT	GO:0048046~apoplast	32	6.11855	6.46014e-09	AT3G03780, AT1G62750, AT4G27520, AT3G55440, AT1G29670, AT5G14740, AT2G36870, AT2G36530, AT3G19170, AT5G59320, AT3G15020, AT1G09310, AT1G23740, AT3G55800, AT4G16880, AT3G04120, AT2G15620, AT3G52880, AT1G35720, AT1G12900, AT5G66530, AT2G38540, AT1G78820, AT3G10080, AT5G04140, AT3G47520, AT1G20160, AT3G44990, AT4G31990, AT3G08590, AT3G48990, AT4G39330	509	477	26013	3.4285	9.04419e-07	1.13052e-07	9.77096e-08
GOTERM_CC_DIRECT	GO:0010287~plastoglobule	12	2.29446	6.42867e-07	AT4G39730, AT1G06690, AT5G08740, AT1G28150, AT2G35490, AT2G34460, AT4G09650, AT3G23400, AT4G32770, AT1G78140, AT4G22240, AT4G04020	509	83	26013	7.38883	8.99974e-05	1.00002e-05	8.643e-06
GOTERM_CC_DIRECT	GO:0009706~chloroplast inner membrane	12	2.29446	1.82816e-06	AT3G56940, AT5G42480, AT5G12860, AT4G30950, AT4G37270, AT1G05140, AT3G47520, AT2G24820, AT3G44880, AT4G23940, AT4G00370, AT4G32770	509	92	26013	6.66601	0.000255909	2.55942e-05	2.21207e-05
GOTERM_CC_DIRECT	GO:0009579~thylakoid	18	3.44168	2.99193e-06	AT5G42270, AT1G77090, AT5G23120, AT3G04790, AT4G24930, AT1G35720, AT2G35490, AT4G09650, AT5G08050, AT3G23400, AT4G28660, AT4G22240, AT4G04020, AT4G39730, AT4G38100, AT1G44575, AT1G23740, AT3G55800	509	229	26013	4.01707	0.000418782	3.8079e-05	3.29112e-05
GOTERM_CC_DIRECT	GO:0031969~chloroplast membrane	14	2.67686	7.16588e-06	AT5G03900, AT3G11945, AT5G20380, AT2G40400, AT1G67300, AT3G56140, AT1G70610, AT2G33380, AT3G46980, AT5G33320, AT2G47490, AT5G05740, AT1G74470, AT5G57030	509	148	26013	4.83436	0.00100272	8.36019e-05	7.22559e-05
GOTERM_CC_DIRECT	GO:0005759~mitochondrial matrix	12	2.29446	1.25755e-05	AT2G26800, AT1G07180, AT5G41480, AT5G04140, AT5G08650, AT3G15020, AT1G53240, AT5G23140, AT2G44620, AT4G22220, AT3G19170, AT3G54900	509	112	26013	5.47565	0.00175903	0.000135428	0.000117049
GOTERM_CC_DIRECT	GO:0005886~plasma membrane	109	20.8413	2.9525e-05	AT3G03780, AT3G27350, AT1G13440, AT5G46570, AT2G36530, AT1G69480, AT2G18790, AT4G37000, AT5G08570, AT5G08690, AT4G26080, AT5G12150, AT1G20650, AT1G07430, AT5G52050, AT4G15450, AT1G58360, AT3G04120, AT3G50380, AT1G58520, AT5G16990, AT1G65690, AT4G28660, AT2G16990, AT3G45600, AT1G79610, AT1G10900, AT5G08740, AT2G21300, AT5G04140, AT3G44990, AT3G57540, AT5G17310, AT2G15970, AT4G23940, AT4G35090, AT1…	509	3802	26013	1.46517	0.00412504	0.00029525	0.000255181
GOTERM_CC_DIRECT	GO:0005774~vacuolar membrane	26	4.97132	5.9988e-05	AT3G55440, AT5G50850, AT3G01280, AT5G65990, AT5G47560, AT2G38210, AT1G79520, AT1G78610, AT3G63520, AT2G23150, AT4G35300, AT4G35000, AT4G17550, AT3G27240, AT3G04120, AT3G52640, AT5G17860, AT3G05030, AT1G27480, AT1G35720, AT3G62700, AT4G39730, AT2G41190, AT3G47520, AT4G17340, AT5G39040	509	535	26013	2.48366	0.00836341	0.000559888	0.000483903
GOTERM_CC_DIRECT	GO:0005737~cytoplasm	134	25.6214	6.62348e-05	AT3G03780, AT2G35840, AT2G39800, AT5G20220, AT1G13440, AT1G64110, AT5G14740, AT2G36530, AT4G21580, AT1G69480, AT4G37000, AT5G08570, AT4G26080, AT5G12150, AT2G42770, AT2G41680, AT2G22360, AT3G04120, AT1G80030, AT5G16990, AT5G48880, AT3G56080, AT4G02890, AT1G79610, AT1G10900, AT2G36390, AT2G21300, AT2G22190, AT2G20290, AT5G13370, AT4G34540, AT4G26530, AT3G30300, AT5G19850, AT5G16980, AT5G17310, AT5…	509	4999	26013	1.36992	0.00923032	0.000579555	0.000500901
GOTERM_CC_DIRECT	GO:0000325~plant-type vacuole	30	5.73614	0.000141942	AT4G27520, AT3G55440, AT5G50850, AT3G01280, AT2G15970, AT2G33380, AT3G05500, AT2G38210, AT1G78610, AT3G63520, AT3G44100, AT2G23150, AT4G35300, AT4G35000, AT4G17550, AT3G27240, AT3G04120, AT4G27830, AT3G52640, AT4G32920, AT1G27480, AT1G35720, AT4G02890, AT3G62700, AT4G39730, AT5G61820, AT2G41190, AT3G47520, AT4G17340, AT5G39040	509	702	26013	2.18402	0.0196772	0.00116894	0.0010103
GOTERM_CC_DIRECT	GO:0005773~vacuole	30	5.73614	0.00028534	AT4G27520, AT3G55440, AT3G01280, AT2G15970, AT2G33380, AT5G47560, AT3G05500, AT3G63520, AT3G44100, AT2G24820, AT2G23150, AT2G46370, AT1G62710, AT4G35300, AT4G35000, AT2G22360, AT3G27240, AT4G27830, AT3G52640, AT4G32920, AT1G27480, AT1G35720, AT4G02890, AT3G62700, AT4G39730, AT5G61820, AT2G21960, AT4G17340, AT2G23120, AT5G39040	509	732	26013	2.09451	0.0391657	0.00221931	0.00191812
GOTERM_CC_DIRECT	GO:0009523~photosystem II	7	1.33843	0.000369561	AT4G35250, AT5G47110, AT5G23120, AT4G34190, AT1G76570, AT1G44575, AT4G14690	509	49	26013	7.30087	0.050432	0.00272308	0.00235352
GOTERM_CC_DIRECT	GO:0010319~stromule	6	1.14723	0.00092701	AT3G47520, AT4G31990, AT4G35090, AT4G09650, AT1G23740, AT4G04020	509	39	26013	7.86248	0.121766	0.00648907	0.00560841
GOTERM_CC_DIRECT	GO:0009501~amyloplast	4	0.764818	0.00229544	AT5G24300, AT2G36390, AT3G01180, AT4G31990	509	14	26013	14.6017	0.275107	0.015303	0.0132261
GOTERM_CC_DIRECT	GO:0031977~thylakoid lumen	6	1.14723	0.00400942	AT1G77090, AT5G23120, AT4G24930, AT3G23400, AT4G22240, AT4G04020	509	54	26013	5.67845	0.430187	0.0255145	0.0220518
GOTERM_CC_DIRECT	GO:0042651~thylakoid membrane	4	0.764818	0.0203346	AT4G35250, AT5G47110, AT5G42310, AT4G31560	509	30	26013	6.81415	0.94365	0.123776	0.106977
GOTERM_CC_DIRECT	GO:0016020~membrane	29	5.54493	0.0313904	AT5G67030, AT1G64950, AT5G42270, AT3G24460, AT1G33110, AT4G18270, AT4G09650, AT5G59320, AT1G02205, AT3G61220, AT1G79520, AT4G21940, AT3G50970, AT3G26290, AT1G73480, AT5G52050, AT3G26310, AT5G17860, AT4G13800, AT1G35720, AT2G39450, AT3G62700, AT2G38540, AT5G59310, AT2G01590, AT2G24230, AT1G77590, AT1G64900, AT2G45770	509	985	26013	1.50465	0.988497	0.183111	0.15826
GOTERM_CC_DIRECT	GO:0008287~protein serine/threonine phosphatase complex	2	0.382409	0.0386768	AT4G26080, AT5G57050	509	2	26013	51.1061	0.996003	0.21659	0.187196
GOTERM_CC_DIRECT	GO:0009532~plastid stroma	3	0.573614	0.0735432	AT5G15450, AT3G47520, AT5G23140	509	23	26013	6.66601	0.999977	0.393351	0.339967
GOTERM_CC_DIRECT	GO:0031304~intrinsic component of mitochondrial inner membrane	2	0.382409	0.0758605	AT1G07180, AT5G08740	509	4	26013	25.553	0.999984	0.393351	0.339967
GOTERM_MF_DIRECT	GO:0022857~transmembrane transporter activity	18	3.44168	0.000578608	AT5G20380, AT1G33110, AT1G67300, AT2G37450, AT1G70610, AT3G21670, AT4G00370, AT5G47560, AT2G16990, AT4G25450, AT5G12860, AT3G46980, AT1G79410, AT3G10670, AT2G26690, AT4G35300, AT5G52050, AT5G39040	425	311	19238	2.61989	0.25818	0.174653	0.173638
GOTERM_MF_DIRECT	GO:0004362~glutathione-disulfide reductase activity	4	0.764818	0.00113667	AT3G24170, AT4G28730, AT3G54660, AT5G03880	425	10	19238	18.1064	0.443927	0.174653	0.173638
GOTERM_MF_DIRECT	GO:0047834~D-threo-aldose 1-dehydrogenase activity	5	0.956023	0.0012419	AT5G53580, AT1G06690, AT1G04690, AT2G37760, AT2G37770	425	22	19238	10.2877	0.473349	0.174653	0.173638
GOTERM_MF_DIRECT	GO:0016491~oxidoreductase activity	24	4.58891	0.0013539	AT3G24170, AT3G55610, AT1G07180, AT2G27150, AT3G04870, AT1G57770, AT2G15620, AT5G16990, AT3G52880, AT5G16970, AT3G27820, AT5G06060, AT2G37760, AT4G21580, AT2G21860, AT1G02205, AT5G08740, AT1G77760, AT3G61220, AT5G04140, AT3G10230, AT4G39330, AT2G41680, AT5G57030	425	522	19238	2.08119	0.502961	0.174653	0.173638
GOTERM_MF_DIRECT	GO:0016616~oxidoreductase activity, acting on the CH-OH group of donors, NAD or NADP as acceptor	7	1.33843	0.00185922	AT5G19440, AT1G09490, AT2G45630, AT3G61220, AT3G47520, AT1G09500, AT4G39330	425	59	19238	5.37053	0.617203	0.191871	0.190756
GOTERM_MF_DIRECT	GO:1901149~salicylic acid binding	5	0.956023	0.0031323	AT2G31570, AT3G04120, AT1G13440, AT1G12900, AT5G55070	425	28	19238	8.08319	0.801865	0.269378	0.267812
GOTERM_MF_DIRECT	GO:0003824~catalytic activity	11	2.10325	0.00472981	AT5G53050, AT5G19440, AT1G17290, AT1G09490, AT5G53120, AT4G36390, AT3G58560, AT1G09500, AT2G46370, AT5G01410, AT2G38210	425	171	19238	2.91184	0.913393	0.348655	0.346628
GOTERM_MF_DIRECT	GO:0016620~oxidoreductase activity, acting on the aldehyde or oxo group of donors, NAD or NADP as acceptor	4	0.764818	0.00678113	AT3G04120, AT4G34240, AT1G13440, AT1G12900	425	18	19238	10.0591	0.970132	0.437383	0.43484
GOTERM_MF_DIRECT	GO:0003729~mRNA binding	36	6.88337	0.00781951	AT3G03780, AT4G26530, AT3G23070, AT1G62750, AT5G20220, AT5G42270, AT5G17790, AT5G42310, AT3G02830, AT3G60750, AT5G15970, AT2G18940, AT1G17220, AT4G09650, AT3G57180, AT5G42390, AT2G20020, AT5G57960, AT4G28080, AT5G08650, AT5G02830, AT3G56940, AT2G26280, AT3G06980, AT3G52880, AT1G12800, AT1G12900, AT3G03710, AT4G02890, AT1G13930, AT1G30610, AT2G35130, AT5G61960, AT5G04140, AT1G44575, AT1G79270	425	1033	19238	1.57751	0.98259	0.448318	0.445712
GOTERM_MF_DIRECT	GO:0004365~glyceraldehyde-3-phosphate dehydrogenase (NAD+) (phosphorylating) activity	3	0.573614	0.00945698	AT3G04120, AT1G13440, AT1G12900	425	7	19238	19.3997	0.992576	0.48798	0.485143
GOTERM_MF_DIRECT	GO:0005507~copper ion binding	11	2.10325	0.0119109	AT3G04120, AT1G13440, AT5G08690, AT3G55440, AT3G54660, AT3G15020, AT1G53240, AT5G66400, AT1G35720, AT3G50970, AT2G36530	425	196	19238	2.54043	0.997936	0.558732	0.555483
GOTERM_MF_DIRECT	GO:0051537~2 iron, 2 sulfur cluster binding	6	1.14723	0.0133642	AT2G27150, AT2G24820, AT3G44880, AT3G07480, AT4G22220, AT3G54900	425	64	19238	4.24368	0.999034	0.574661	0.57132
GOTERM_MF_DIRECT	GO:0004791~thioredoxin-disulfide reductase activity	3	0.573614	0.0157459	AT3G24170, AT3G54660, AT2G41680	425	9	19238	15.0886	0.999722	0.624992	0.621359
GOTERM_MF_DIRECT	GO:0050661~NADP binding	6	1.14723	0.017022	AT3G24170, AT3G04120, AT1G13440, AT4G19710, AT3G54660, AT1G12900	425	68	19238	3.99405	0.999858	0.627382	0.623734
GOTERM_MF_DIRECT	GO:0004022~alcohol dehydrogenase (NAD) activity	3	0.573614	0.0233673	AT5G19440, AT1G09490, AT1G09500	425	11	19238	12.3452	0.999995	0.669863	0.665968
GOTERM_MF_DIRECT	GO:0030060~L-malate dehydrogenase activity	3	0.573614	0.0233673	AT3G47520, AT3G15020, AT1G53240	425	11	19238	12.3452	0.999995	0.669863	0.665968
GOTERM_MF_DIRECT	GO:0016868~intramolecular transferase activity, phosphotransferases	3	0.573614	0.0233673	AT1G23190, AT5G64460, AT1G58280	425	11	19238	12.3452	0.999995	0.669863	0.665968
GOTERM_MF_DIRECT	GO:2001070~starch binding	3	0.573614	0.0233673	AT5G01260, AT1G07110, AT3G52180	425	11	19238	12.3452	0.999995	0.669863	0.665968
GOTERM_MF_DIRECT	GO:0032440~2-alkenal reductase [NAD(P)] activity	3	0.573614	0.0276375	AT5G16980, AT5G16990, AT5G16970	425	12	19238	11.3165	0.999999	0.750575	0.746211
GOTERM_MF_DIRECT	GO:0016168~chlorophyll binding	4	0.764818	0.038416	AT5G47110, AT4G34190, AT1G76570, AT1G44575	425	34	19238	5.3254	1	0.820096	0.815328
GOTERM_MF_DIRECT	GO:0004222~metalloendopeptidase activity	5	0.956023	0.0409815	AT5G42270, AT2G21960, AT1G05140, AT4G23940, AT3G19170	425	59	19238	3.83609	1	0.820096	0.815328
GOTERM_MF_DIRECT	GO:0070401~NADP+ binding	2	0.382409	0.0435948	AT2G37760, AT2G37770	425	2	19238	45.2659	1	0.820096	0.815328
GOTERM_MF_DIRECT	GO:0004350~glutamate-5-semialdehyde dehydrogenase activity	2	0.382409	0.0435948	AT2G39800, AT3G55610	425	2	19238	45.2659	1	0.820096	0.815328
GOTERM_MF_DIRECT	GO:0004349~glutamate 5-kinase activity	2	0.382409	0.0435948	AT2G39800, AT3G55610	425	2	19238	45.2659	1	0.820096	0.815328
GOTERM_MF_DIRECT	GO:0005534~galactose binding	2	0.382409	0.0435948	AT2G42530, AT2G42540	425	2	19238	45.2659	1	0.820096	0.815328
GOTERM_MF_DIRECT	GO:0004347~glucose-6-phosphate isomerase activity	2	0.382409	0.0435948	AT4G24620, AT5G42740	425	2	19238	45.2659	1	0.820096	0.815328
GOTERM_MF_DIRECT	GO:0004033~aldo-keto reductase (NADP) activity	2	0.382409	0.0435948	AT2G37760, AT2G37770	425	2	19238	45.2659	1	0.820096	0.815328
GOTERM_MF_DIRECT	GO:0000287~magnesium ion binding	8	1.52964	0.0445013	AT2G35840, AT5G52920, AT5G08570, AT1G70730, AT1G23190, AT2G36530, AT4G21470, AT2G18230	425	147	19238	2.46345	1	0.820096	0.815328
GOTERM_MF_DIRECT	GO:0004176~ATP-dependent peptidase activity	4	0.764818	0.047552	AT5G42270, AT2G21960, AT4G23940, AT5G23140	425	37	19238	4.89361	1	0.846098	0.841179
GOTERM_MF_DIRECT	GO:0008194~UDP-glycosyltransferase activity	7	1.33843	0.0498342	AT2G30150, AT3G16520, AT1G05680, AT4G15490, AT4G15550, AT2G36750, AT4G27560	425	120	19238	2.64051	1	0.857148	0.852164
GOTERM_MF_DIRECT	GO:0020037~heme binding	15	2.86807	0.0560023	AT1G64950, AT3G27240, AT3G26310, AT2G15620, AT5G20140, AT3G17070, AT4G35090, AT3G14690, AT4G12320, AT3G14650, AT3G14660, AT1G77760, AT3G26290, AT4G35000, AT1G64900	425	395	19238	1.71896	1	0.867826	0.862781
GOTERM_MF_DIRECT	GO:0017018~myosin phosphatase activity	7	1.33843	0.0567292	AT3G05640, AT1G72770, AT4G26080, AT5G66720, AT1G07430, AT5G59220, AT5G57050	425	124	19238	2.55533	1	0.867826	0.862781
GOTERM_MF_DIRECT	GO:0051287~NAD binding	5	0.956023	0.0603348	AT3G04120, AT2G45630, AT1G13440, AT1G12900, AT2G41540	425	67	19238	3.37805	1	0.867826	0.862781
GOTERM_MF_DIRECT	GO:0045430~chalcone isomerase activity	2	0.382409	0.0646759	AT5G05270, AT3G55120	425	3	19238	30.1773	1	0.867826	0.862781
GOTERM_MF_DIRECT	GO:0004614~phosphoglucomutase activity	2	0.382409	0.0646759	AT1G70730, AT1G23190	425	3	19238	30.1773	1	0.867826	0.862781
GOTERM_MF_DIRECT	GO:0016229~steroid dehydrogenase activity	2	0.382409	0.0646759	AT2G37760, AT2G37770	425	3	19238	30.1773	1	0.867826	0.862781
GOTERM_MF_DIRECT	GO:0004412~homoserine dehydrogenase activity	2	0.382409	0.0646759	AT4G19710, AT5G21060	425	3	19238	30.1773	1	0.867826	0.862781
GOTERM_MF_DIRECT	GO:0004123~cystathionine gamma-lyase activity	2	0.382409	0.0646759	AT5G28030, AT1G64660	425	3	19238	30.1773	1	0.867826	0.862781
GOTERM_MF_DIRECT	GO:0016791~phosphatase activity	6	1.14723	0.0655915	AT3G05640, AT1G72770, AT4G26080, AT1G47510, AT1G65580, AT5G59220	425	98	19238	2.77138	1	0.867826	0.862781
GOTERM_MF_DIRECT	GO:0005315~inorganic phosphate transmembrane transporter activity	3	0.573614	0.0709265	AT5G20380, AT3G46980, AT4G00370	425	20	19238	6.78988	1	0.90813	0.90285
GOTERM_MF_DIRECT	GO:0008289~lipid binding	7	1.33843	0.0721576	AT5G59320, AT5G59310, AT1G19140, AT2G42530, AT2G42540, AT5G35180, AT2G38540	425	132	19238	2.40046	1	0.90813	0.90285
GOTERM_MF_DIRECT	GO:0008324~cation transmembrane transporter activity	3	0.573614	0.0772844	AT5G17860, AT1G79520, AT2G39450	425	21	19238	6.46655	1	0.916904	0.911573
GOTERM_MF_DIRECT	GO:0010277~chlorophyllide a oxygenase [overall] activity	2	0.382409	0.0852934	AT2G24820, AT3G44880	425	4	19238	22.6329	1	0.916904	0.911573
GOTERM_MF_DIRECT	GO:0048029~monosaccharide binding	2	0.382409	0.0852934	AT4G24620, AT5G42740	425	4	19238	22.6329	1	0.916904	0.911573
GOTERM_MF_DIRECT	GO:0016209~antioxidant activity	2	0.382409	0.0852934	AT5G65840, AT2G37240	425	4	19238	22.6329	1	0.916904	0.911573
GOTERM_MF_DIRECT	GO:0015193~L-proline transmembrane transporter activity	2	0.382409	0.0852934	AT1G58360, AT2G36590	425	4	19238	22.6329	1	0.916904	0.911573
GOTERM_MF_DIRECT	GO:0016843~amine-lyase activity	2	0.382409	0.0852934	AT5G01410, AT2G38210	425	4	19238	22.6329	1	0.916904	0.911573
GOTERM_MF_DIRECT	GO:0033201~alpha-1,4-glucan synthase activity	2	0.382409	0.0852934	AT5G24300, AT3G01180	425	4	19238	22.6329	1	0.916904	0.911573
GOTERM_MF_DIRECT	GO:0004722~protein serine/threonine phosphatase activity	5	0.956023	0.0934876	AT3G05640, AT1G72770, AT4G26080, AT5G59220, AT5G57050	425	78	19238	2.90166	1	0.966384	0.960766
GOTERM_MF_DIRECT	GO:0016705~oxidoreductase activity, acting on paired donors, with incorporation or reduction of molecular oxygen	10	1.91205	0.0936419	AT3G14690, AT1G64950, AT4G12320, AT3G14650, AT3G26310, AT3G14660, AT3G10230, AT3G26290, AT1G64900, AT5G57030	425	245	19238	1.84759	1	0.966384	0.960766

## Sheet: KEGG-co-downregulated genes
Category	Term	Coun	%	Pvalue
ath04075	Plant hormone signal transduction	16	3.45572	0.000105713
ath04016	MAPK signaling pathway - plan	t 9	1.94384	0.00248369
ath01110	Biosynthesis of secondary metabolites	31	6.69546	0.0331768
ath04626	Plant-pathogen interaction	8	1.72786	0.0601535

## Sheet: GO-co-downregulated genes
Category	Term	Count	%	PValue	Genes	List Total	Pop Hits	Pop Total	Fold Enrichment	Bonferroni	Benjamini	FDR
GOTERM_BP_DIRECT	GO:0040007~growth	21	4.53564	3.04562e-12	AT2G34510, AT5G44680, AT1G56140, AT5G15350, AT1G62790, AT3G54880, AT4G00300, AT5G52882, AT4G23820, AT2G30010, AT1G72416, AT5G57550, AT3G19850, AT5G60710, AT1G49730, AT2G30930, AT1G25230, AT5G03120, AT1G14380, AT1G06640, AT3G52500	436	140	22636	7.78761	1.99492e-09	1.99488e-09	1.9157e-09
GOTERM_BP_DIRECT	GO:0048589~developmental growth	35	7.5594	7.49483e-08	AT5G65390, AT4G02540, AT1G55360, AT3G07460, AT2G17550, AT2G35880, AT2G30990, AT1G30200, AT1G36940, AT2G22860, AT3G16850, AT1G23480, AT5G06930, AT2G03980, AT2G46490, AT1G76890, AT2G46330, AT4G34770, AT1G66940, AT5G44020, AT3G54880, AT3G05150, AT1G04040, AT3G07010, AT5G65440, AT4G29310, AT2G39180, AT1G69160, AT4G14750, AT4G03190, AT5G64850, AT3G06070, AT5G11070, AT2G44500, AT1G78260	436	631	22636	2.87973	4.90899e-05	2.45456e-05	2.35712e-05
GOTERM_BP_DIRECT	GO:0014070~response to organic cyclic compound	18	3.88769	6.22362e-07	AT4G22690, AT2G17705, AT3G03870, AT2G14900, AT3G07460, AT3G07010, AT5G14120, AT1G18210, AT4G23820, AT2G17550, AT2G35880, AT5G45490, AT1G69160, AT2G16380, AT4G36670, AT1G52290, AT2G46330, AT5G18490	436	208	22636	4.49285	0.000407564	0.000135882	0.000130489
GOTERM_BP_DIRECT	GO:0010015~root morphogenesis	23	4.9676	3.59862e-06	AT5G65390, AT5G44020, AT1G04040, AT3G07010, AT3G28940, AT2G17550, AT2G35880, AT2G30990, AT4G14750, AT4G38690, AT1G23480, AT2G30930, AT5G64850, AT2G01420, AT1G28670, AT5G06930, AT2G03980, AT3G06070, AT5G11070, AT4G32950, AT2G44500, AT2G41990, AT1G78260	436	372	22636	3.20995	0.00235432	0.000589274	0.000565883
GOTERM_BP_DIRECT	GO:0009826~unidimensional cell growth	14	3.02376	3.17869e-05	AT5G44020, AT3G02170, AT2G18300, AT4G39400, AT1G21270, AT1G50430, AT3G19820, AT1G53730, AT4G38690, AT1G72300, AT5G64850, AT3G63310, AT5G07830, AT5G54380	436	173	22636	4.20141	0.0206055	0.00416408	0.00399879
GOTERM_BP_DIRECT	GO:0042742~defense response to bacterium	41	8.85529	5.98606e-05	AT4G22690, AT3G03020, AT4G04960, AT5G46330, AT5G23510, AT3G04210, AT1G62790, AT3G29670, AT3G28940, AT3G19190, AT2G39400, AT4G36670, AT4G08470, AT4G15233, AT1G08900, AT1G27020, AT1G78830, AT1G53390, AT2G46330, AT1G79380, AT5G01710, AT1G12220, AT2G17705, AT1G11350, AT4G23130, AT3G03870, AT1G13110, AT5G46780, AT5G17880, AT1G59870, AT5G60270, AT3G57330, AT5G65240, AT4G20260, AT5G57550, AT4G15800, AT1…	436	1079	22636	1.97277	0.0384511	0.00653479	0.00627539
GOTERM_BP_DIRECT	GO:0033993~response to lipid	15	3.23974	7.67072e-05	AT2G14900, AT5G23510, AT3G07010, AT4G23820, AT1G63260, AT2G35880, AT5G46250, AT3G42800, AT1G69160, AT4G36670, AT4G18205, AT5G03120, AT1G53440, AT1G76890, AT2G46330	436	215	22636	3.62215	0.0490037	0.00684452	0.00657283
GOTERM_BP_DIRECT	GO:0071555~cell wall organization	18	3.88769	8.35972e-05	AT1G32170, AT4G01750, AT4G25810, AT2G15880, AT5G47780, AT5G57550, AT4G13410, AT1G19360, AT1G23480, AT5G65730, AT4G19420, AT4G19410, AT4G37800, AT2G44500, AT4G30270, AT3G28180, AT5G16190, AT5G33290	436	302	22636	3.09442	0.0532862	0.00684452	0.00657283
GOTERM_BP_DIRECT	GO:0009755~hormone-mediated signaling pathway	20	4.31965	9.96099e-05	AT5G01710, AT4G22690, AT3G03020, AT1G12320, AT4G02540, AT5G46780, AT1G56140, AT5G52882, AT1G31540, AT3G28940, AT2G17550, AT2G39400, AT4G39400, AT5G65207, AT4G15233, AT1G53730, AT1G28660, AT4G19200, AT5G11070, AT2G44500	436	367	22636	2.82929	0.0631646	0.00724939	0.00696162
GOTERM_BP_DIRECT	GO:0009741~response to brassinosteroid	7	1.51188	0.000185089	AT1G69160, AT2G21220, AT4G00720, AT4G34760, AT4G30270, AT4G38860, AT5G54380	436	44	22636	8.25959	0.114183	0.0112297	0.010784
GOTERM_BP_DIRECT	GO:0009733~response to auxin	18	3.88769	0.000188591	AT1G59870, AT3G07010, AT4G23820, AT2G34680, AT3G56060, AT1G69160, AT4G29080, AT4G34790, AT2G21220, AT4G03190, AT2G22810, AT2G30930, AT1G29430, AT1G72430, AT5G06930, AT4G34760, AT4G34770, AT4G38860	436	323	22636	2.89323	0.116212	0.0112297	0.010784
GOTERM_BP_DIRECT	GO:0090558~plant epidermis development	18	3.88769	0.000210176	AT5G65390, AT2G14900, AT5G44020, AT3G07460, AT3G28940, AT2G17550, AT2G30990, AT3G56060, AT4G14750, AT1G22330, AT4G38690, AT1G23480, AT2G30930, AT1G28670, AT2G03980, AT3G06070, AT2G44500, AT1G78260	436	326	22636	2.86661	0.128622	0.0114721	0.0110167
GOTERM_BP_DIRECT	GO:0009611~response to wounding	30	6.47948	0.000931042	AT5G23510, AT1G58110, AT5G23210, AT5G14120, AT1G18210, AT1G67560, AT1G75960, AT2G22860, AT4G36670, AT1G72450, AT4G18205, AT2G42490, AT1G27020, AT1G78830, AT3G43270, AT2G03980, AT1G06640, AT2G48010, AT1G79380, AT5G16190, AT5G01710, AT5G52882, AT4G15800, AT1G01140, AT1G50590, AT1G72300, AT3G52500, AT2G44500, AT3G15356, AT5G21105	436	803	22636	1.93963	0.456712	0.0469102	0.0450481
GOTERM_BP_DIRECT	GO:0071554~cell wall organization or biogenesis	11	2.37581	0.0015748	AT1G69160, AT1G01430, AT4G14750, AT5G65390, AT1G22330, AT4G38690, AT2G44500, AT3G28940, AT2G17550, AT2G30990, AT3G56060	436	168	22636	3.39936	0.643815	0.073678	0.0707533
GOTERM_BP_DIRECT	GO:0010411~xyloglucan metabolic process	6	1.2959	0.00222304	AT1G32170, AT5G57550, AT4G25810, AT5G65730, AT4G37800, AT4G30270	436	48	22636	6.48968	0.767231	0.0912934	0.0876695
GOTERM_BP_DIRECT	GO:0055085~transmembrane transport	17	3.67171	0.00223007	AT3G06450, AT1G59870, AT5G55930, AT3G59310, AT3G16180, AT4G23400, AT1G30420, AT1G64170, AT3G62150, AT1G16390, AT5G53550, AT5G13760, AT5G62730, AT5G64410, AT2G01420, AT2G02020, AT5G18290	436	369	22636	2.39186	0.768303	0.0912934	0.0876695
GOTERM_BP_DIRECT	GO:0009267~cellular response to starvation	4	0.863931	0.00270013	AT1G23020, AT5G28770, AT3G62420, AT2G45170	436	15	22636	13.8446	0.829834	0.1013	0.0972788
GOTERM_BP_DIRECT	GO:0042546~cell wall biogenesis	10	2.15983	0.00288121	AT1G32170, AT5G57550, AT1G53730, AT4G25810, AT5G65730, AT1G06640, AT4G37800, AT4G30270, AT2G46330, AT4G29310	436	153	22636	3.3933	0.848916	0.1013	0.0972788
GOTERM_BP_DIRECT	GO:0030154~cell differentiation	26	5.61555	0.00293847	AT5G65390, AT3G07460, AT3G28940, AT2G17550, AT2G35880, AT2G30990, AT2G22860, AT1G22330, AT4G38690, AT1G23480, AT2G30930, AT1G28670, AT4G32950, AT5G44020, AT3G05150, AT3G07010, AT3G22750, AT5G65440, AT4G14750, AT5G64850, AT2G02020, AT3G06070, AT5G11070, AT2G44500, AT2G41990, AT1G78260	436	711	22636	1.89853	0.854493	0.1013	0.0972788
GOTERM_BP_DIRECT	GO:0071396~cellular response to lipid	5	1.07991	0.00315931	AT3G03020, AT2G30600, AT3G28940, AT2G17550, AT1G36940	436	32	22636	8.1121	0.874145	0.102187	0.0981304
GOTERM_BP_DIRECT	GO:0045493~xylan catabolic process	4	0.863931	0.00327621	AT1G58370, AT5G64570, AT1G02640, AT5G49360	436	16	22636	12.9794	0.883451	0.102187	0.0981304
GOTERM_BP_DIRECT	GO:1901701~cellular response to oxygen-containing compound	18	3.88769	0.00374323	AT5G01710, AT1G15400, AT3G03020, AT5G23510, AT5G46780, AT1G56140, AT4G00300, AT3G28940, AT1G36940, AT4G18205, AT2G30600, AT1G53440, AT2G48010, AT2G44500, AT4G17030, AT3G47570, AT5G18490, AT1G22400	436	425	22636	2.19886	0.914258	0.111446	0.107022
GOTERM_BP_DIRECT	GO:0060918~auxin transport	4	0.863931	0.00392201	AT1G69160, AT4G31820, AT5G12050, AT3G42800	436	17	22636	12.2159	0.923768	0.111692	0.107259
GOTERM_BP_DIRECT	GO:0046777~protein autophosphorylation	11	2.37581	0.00529977	AT1G11350, AT1G56140, AT4G00720, AT1G74740, AT1G53440, AT1G70520, AT2G31800, AT5G49760, AT1G56720, AT5G03730, AT5G54380	436	199	22636	2.86981	0.969211	0.141556	0.135937
GOTERM_BP_DIRECT	GO:0007165~signal transduction	32	6.91145	0.00543066	AT1G15400, AT2G34510, AT5G23510, AT3G04210, AT4G00720, AT4G00300, AT1G18210, AT1G71400, AT2G30990, AT1G72416, AT4G36670, AT4G18205, AT1G78830, AT4G19530, AT4G17030, AT3G47570, AT5G18490, AT3G12610, AT2G17705, AT1G13110, AT5G17880, AT4G25810, AT1G31540, AT5G57550, AT1G69160, AT4G15800, AT1G01140, AT1G50590, AT2G30600, AT5G11250, AT1G53440, AT5G07770	436	989	22636	1.67984	0.971753	0.141556	0.135937
GOTERM_BP_DIRECT	GO:0009642~response to light intensity	12	2.59179	0.005619	AT4G25100, AT2G16380, AT5G44020, AT3G29670, AT3G54880, AT1G25230, AT3G27770, AT5G14120, AT2G42610, AT3G13750, AT3G15630, AT3G26932	436	233	22636	2.67386	0.975049	0.141556	0.135937
GOTERM_BP_DIRECT	GO:0006468~protein phosphorylation	30	6.47948	0.00584698	AT4G04960, AT5G46330, AT5G41260, AT1G66930, AT1G33770, AT1G55200, AT1G34300, AT4G03390, AT1G53730, AT4G08470, AT1G49730, AT2G48010, AT3G47570, AT1G11350, AT4G23130, AT1G56140, AT1G70520, AT5G60270, AT3G22750, AT5G65240, AT4G04570, AT2G39180, AT1G21270, AT1G72300, AT1G53440, AT3G50500, AT3G25070, AT5G39020, AT1G52290, AT5G56040	436	912	22636	1.70781	0.978528	0.141843	0.136213
GOTERM_BP_DIRECT	GO:0080163~regulation of protein serine/threonine phosphatase activity	4	0.863931	0.00630072	AT5G05440, AT5G46790, AT2G38310, AT4G17870	436	20	22636	10.3835	0.984078	0.147392	0.141541
GOTERM_BP_DIRECT	GO:0009742~brassinosteroid mediated signaling pathway	7	1.51188	0.00701373	AT4G39400, AT5G41260, AT3G63310, AT5G65430, AT2G18300, AT2G42870, AT5G54380	436	88	22636	4.1298	0.99005	0.154449	0.148318
GOTERM_BP_DIRECT	GO:0032870~cellular response to hormone stimulus	9	1.94384	0.00707401	AT2G17705, AT2G34510, AT5G35732, AT5G23510, AT1G50590, AT1G53440, AT1G18210, AT1G36940, AT5G18490	436	145	22636	3.22246	0.990438	0.154449	0.148318
GOTERM_BP_DIRECT	GO:0009735~response to cytokinin	6	1.2959	0.0077141	AT2G34510, AT1G78240, AT3G16857, AT2G18300, AT3G10520, AT1G03850	436	64	22636	4.86726	0.993732	0.162991	0.156522
GOTERM_BP_DIRECT	GO:0009414~response to water deprivation	31	6.69546	0.00871241	AT4G22690, AT5G23510, AT3G29670, AT5G61590, AT4G23400, AT3G28940, AT5G65730, AT1G75380, AT1G06640, AT3G16857, AT5G18490, AT2G17705, AT1G56280, AT1G12320, AT3G03870, AT5G46780, AT1G59870, AT1G33240, AT4G20260, AT5G12420, AT1G50590, AT5G08520, AT1G44770, AT4G19200, AT3G50500, AT5G11070, AT2G41430, AT2G44500, AT5G21105, AT1G08930, AT3G30775	436	981	22636	1.64061	0.996758	0.178332	0.171253
GOTERM_BP_DIRECT	GO:0031222~arabinan catabolic process	3	0.647948	0.00955528	AT5G64570, AT1G02640, AT5G49360	436	8	22636	19.469	0.998143	0.189658	0.18213
GOTERM_BP_DIRECT	GO:0043436~oxoacid metabolic process	13	2.80778	0.0102053	AT4G22690, AT4G19160, AT3G29670, AT1G04040, AT3G28650, AT3G59010, AT5G46250, AT2G39300, AT1G23020, AT1G75960, AT1G50590, AT1G27020, AT2G42610	436	288	22636	2.3435	0.998792	0.196603	0.188799
GOTERM_BP_DIRECT	GO:0010929~positive regulation of auxin mediated signaling pathway	3	0.647948	0.0121302	AT1G69160, AT5G12050, AT3G42800	436	9	22636	17.3058	0.999662	0.22627	0.217288
GOTERM_BP_DIRECT	GO:0009734~auxin-activated signaling pathway	11	2.37581	0.0124362	AT1G69160, AT4G29080, AT4G03190, AT1G59870, AT1G29430, AT2G01420, AT5G12050, AT1G63260, AT4G34760, AT3G26810, AT3G42800	436	226	22636	2.52695	0.999724	0.22627	0.217288
GOTERM_BP_DIRECT	GO:0071407~cellular response to organic cyclic compound	6	1.2959	0.0132204	AT5G46780, AT2G44500, AT3G47570, AT3G28940, AT1G36940, AT5G18490	436	73	22636	4.26719	0.999836	0.234036	0.224746
GOTERM_BP_DIRECT	GO:0016132~brassinosteroid biosynthetic process	4	0.863931	0.0161708	AT1G50430, AT3G19820, AT2G45400, AT3G30180	436	28	22636	7.41678	0.999977	0.272687	0.261863
GOTERM_BP_DIRECT	GO:0071669~plant-type cell wall organization or biogenesis	8	1.72786	0.0162363	AT1G32170, AT2G39180, AT4G15800, AT1G55360, AT4G37800, AT4G30270, AT2G46330, AT4G29310	436	136	22636	3.05397	0.999978	0.272687	0.261863
GOTERM_BP_DIRECT	GO:1901605~alpha-amino acid metabolic process	6	1.2959	0.0180841	AT1G13110, AT3G43270, AT2G03980, AT3G47570, AT5G21105, AT1G22400	436	79	22636	3.9431	0.999994	0.291606	0.280031
GOTERM_BP_DIRECT	GO:0045893~positive regulation of transcription, DNA-templated	13	2.80778	0.0185368	AT1G56280, AT5G46760, AT3G54620, AT3G05690, AT3G58120, AT5G61590, AT3G04740, AT1G26960, AT5G03150, AT5G08520, AT3G62420, AT5G06930, AT4G17880	436	313	22636	2.15632	0.999995	0.291606	0.280031
GOTERM_BP_DIRECT	GO:0009873~ethylene-activated signaling pathway	10	2.15983	0.0190207	AT5G07580, AT1G06160, AT1G25560, AT1G68840, AT1G72430, AT5G61590, AT2G46490, AT2G48010, AT5G03730, AT3G15356	436	207	22636	2.50809	0.999997	0.291606	0.280031
GOTERM_BP_DIRECT	GO:0031347~regulation of defense response	19	4.10367	0.0191436	AT2G17705, AT5G23510, AT5G46780, AT3G04210, AT3G26200, AT1G31540, AT3G28940, AT2G39400, AT4G36670, AT1G72450, AT1G50590, AT1G72300, AT1G53440, AT2G48010, AT2G44500, AT4G17030, AT3G47570, AT1G22400, AT1G61667	436	546	22636	1.80665	0.999997	0.291606	0.280031
GOTERM_BP_DIRECT	GO:0001666~response to hypoxia	7	1.51188	0.0228788	AT5G65207, AT2G16060, AT3G20395, AT3G27770, AT2G31810, AT5G03730, AT2G23690	436	114	22636	3.18791	1	0.340582	0.327063
GOTERM_BP_DIRECT	GO:0002376~immune system process	11	2.37581	0.0268209	AT4G22690, AT4G36670, AT4G15233, AT1G13110, AT3G04210, AT5G46780, AT4G15800, AT1G78830, AT3G28940, AT2G39400, AT5G65240	436	256	22636	2.23083	1	0.390393	0.374897
GOTERM_BP_DIRECT	GO:0010114~response to red light	6	1.2959	0.0297889	AT2G21650, AT4G15233, AT5G17880, AT1G28660, AT1G28670, AT1G78260	436	90	22636	3.46116	1	0.424168	0.407331
GOTERM_BP_DIRECT	GO:0050832~defense response to fungus	29	6.2635	0.0356589	AT4G22690, AT5G23510, AT3G04210, AT5G23210, AT3G28940, AT3G19190, AT2G22860, AT4G36670, AT4G08470, AT1G27020, AT1G75380, AT2G48010, AT1G53390, AT5G18490, AT1G03850, AT5G01710, AT2G17705, AT1G13110, AT5G46780, AT1G59870, AT1G29340, AT5G57550, AT5G32450, AT4G15800, AT1G50590, AT3G63310, AT2G44500, AT3G15356, AT5G54380	436	1015	22636	1.48336	1	0.489445	0.470016
GOTERM_BP_DIRECT	GO:0044255~cellular lipid metabolic process	9	1.94384	0.0361079	AT1G75960, AT4G14750, AT5G45650, AT5G44020, AT3G16850, AT1G22330, AT3G62110, AT3G29670, AT3G05150	436	196	22636	2.38396	1	0.489445	0.470016
GOTERM_BP_DIRECT	GO:0052544~defense response by callose deposition in cell wall	3	0.647948	0.037013	AT5G46330, AT1G59870, AT1G18570	436	16	22636	9.73452	1	0.489445	0.470016
GOTERM_BP_DIRECT	GO:0080167~response to karrikin	7	1.51188	0.0373622	AT1G25275, AT5G64410, AT5G64620, AT5G51550, AT3G21560, AT1G01300, AT3G43800	436	128	22636	2.83923	1	0.489445	0.470016
GOTERM_BP_DIRECT	GO:0010200~response to chitin	15	3.23974	0.039871	AT5G01710, AT1G32170, AT4G22690, AT3G04210, AT1G59870, AT5G57550, AT3G16530, AT4G15800, AT1G50590, AT1G23030, AT5G11070, AT2G48010, AT2G44500, AT3G47570, AT1G08930	436	431	22636	1.80687	1	0.512069	0.491743
GOTERM_BP_DIRECT	GO:0009620~response to fungus	12	2.59179	0.0451864	AT3G26200, AT1G59870, AT1G62790, AT1G78830, AT1G53440, AT2G01340, AT1G18210, AT5G11070, AT3G06070, AT3G14310, AT2G39400, AT1G22400	436	319	22636	1.95301	1	0.552378	0.530451
GOTERM_BP_DIRECT	GO:0071695~anatomical structure maturation	6	1.2959	0.0454011	AT1G32170, AT4G38690, AT1G23480, AT3G07460, AT3G06070, AT2G44500	436	101	22636	3.0842	1	0.552378	0.530451
GOTERM_BP_DIRECT	GO:0009753~response to jasmonic acid	16	3.45572	0.0455396	AT3G03020, AT5G46760, AT1G06160, AT5G14120, AT5G27380, AT1G72416, AT1G75960, AT1G72450, AT2G42490, AT4G15800, AT3G43270, AT2G03980, AT1G06640, AT2G48010, AT2G44500, AT5G21105	436	480	22636	1.73058	1	0.552378	0.530451
GOTERM_BP_DIRECT	GO:0006857~oligopeptide transport	3	0.647948	0.0507986	AT5G64410, AT5G55930, AT2G02020	436	19	22636	8.19749	1	0.594163	0.570578
GOTERM_BP_DIRECT	GO:0010817~regulation of hormone levels	3	0.647948	0.0507986	AT1G66940, AT5G07770, AT4G23820	436	19	22636	8.19749	1	0.594163	0.570578
GOTERM_BP_DIRECT	GO:0009627~systemic acquired resistance	6	1.2959	0.0520883	AT4G08470, AT3G04210, AT1G59870, AT1G09750, AT3G04740, AT5G64570	436	105	22636	2.96671	1	0.597457	0.573741
GOTERM_BP_DIRECT	GO:0008610~lipid biosynthetic process	9	1.94384	0.0540474	AT1G63300, AT4G14750, AT3G23480, AT5G15350, AT3G29670, AT3G05150, AT3G27770, AT1G14290, AT5G47780	436	213	22636	2.19369	1	0.597457	0.573741
GOTERM_BP_DIRECT	GO:0098542~defense response to other organism	21	4.53564	0.0553243	AT3G26200, AT3G29670, AT3G54880, AT1G29340, AT1G18210, AT3G23550, AT2G17550, AT2G30990, AT5G46250, AT1G72416, AT2G30930, AT5G64850, AT1G53440, AT3G43270, AT5G11070, AT2G48010, AT3G47570, AT1G52290, AT5G18490, AT1G22400, AT1G61667	436	706	22636	1.54429	1	0.597457	0.573741
GOTERM_BP_DIRECT	GO:0015671~oxygen transport	2	0.431965	0.0565532	AT2G16060, AT3G10520	436	3	22636	34.6116	1	0.597457	0.573741
GOTERM_BP_DIRECT	GO:0006695~cholesterol biosynthetic process	2	0.431965	0.0565532	AT1G50430, AT5G47770	436	3	22636	34.6116	1	0.597457	0.573741
GOTERM_BP_DIRECT	GO:0061709~reticulophagy	2	0.431965	0.0565532	AT3G19190, AT4G30790	436	3	22636	34.6116	1	0.597457	0.573741
GOTERM_BP_DIRECT	GO:0071310~cellular response to organic substance	8	1.72786	0.0579206	AT1G32170, AT3G04210, AT2G14900, AT1G78830, AT4G25810, AT5G14120, AT2G48010, AT4G17030	436	179	22636	2.32033	1	0.602191	0.578287
GOTERM_BP_DIRECT	GO:0006863~purine nucleobase transport	3	0.647948	0.0608476	AT1G57990, AT1G19770, AT4G18197	436	21	22636	7.41678	1	0.622738	0.598018
GOTERM_BP_DIRECT	GO:0050790~regulation of catalytic activity	3	0.647948	0.066105	AT1G02300, AT4G01610, AT2G31810	436	22	22636	7.07965	1	0.666135	0.639693
GOTERM_BP_DIRECT	GO:0009739~response to gibberellin	5	1.07991	0.0707378	AT1G26960, AT5G08520, AT2G31730, AT3G50500, AT4G30270	436	81	22636	3.20478	1	0.696511	0.668863
GOTERM_BP_DIRECT	GO:0072330~monocarboxylic acid biosynthetic process	4	0.863931	0.0712462	AT1G63300, AT4G14750, AT2G03980, AT5G16190	436	50	22636	4.15339	1	0.696511	0.668863
GOTERM_BP_DIRECT	GO:2000693~positive regulation of seed maturation	2	0.431965	0.074686	AT3G54620, AT3G62420	436	4	22636	25.9587	1	0.719402	0.690845
GOTERM_BP_DIRECT	GO:0009606~tropism	3	0.647948	0.0770471	AT1G66940, AT5G07770, AT3G26932	436	24	22636	6.48968	1	0.731389	0.702357
GOTERM_BP_DIRECT	GO:0009626~plant-type hypersensitive response	5	1.07991	0.0839747	AT1G12220, AT1G59870, AT1G29340, AT4G03110, AT3G25070	436	86	22636	3.01846	1	0.785764	0.754573
GOTERM_BP_DIRECT	GO:0009416~response to light stimulus	29	6.2635	0.0867568	AT4G19160, AT2G34510, AT1G57980, AT1G11380, AT3G30180, AT1G72416, AT3G19820, AT4G36670, AT4G34790, AT4G38690, AT1G23480, AT1G78830, AT2G42610, AT5G04530, AT2G46330, AT4G34770, AT5G44680, AT1G13110, AT5G17880, AT3G54880, AT2G31090, AT1G15830, AT5G45490, AT4G38420, AT3G16660, AT2G16280, AT2G30600, AT3G06070, AT1G20620	436	1109	22636	1.35762	1	0.800362	0.768592
GOTERM_BP_DIRECT	GO:0002239~response to oomycetes	3	0.647948	0.08851	AT3G16530, AT1G59870, AT2G39210	436	26	22636	5.99047	1	0.805195	0.773233
GOTERM_BP_DIRECT	GO:0009737~response to abscisic acid	26	5.61555	0.0907067	AT4G22690, AT3G03020, AT3G26200, AT3G29670, AT3G28940, AT4G32150, AT2G42490, AT4G38690, AT5G18490, AT2G17705, AT1G12320, AT1G56140, AT5G46780, AT2G32487, AT1G59870, AT4G25810, AT5G12420, AT4G15800, AT1G50590, AT4G19200, AT2G26110, AT3G50500, AT2G44500, AT1G08930, AT4G38860, AT1G22400	436	977	22636	1.38163	1	0.80758	0.775524
GOTERM_BP_DIRECT	GO:1901698~response to nitrogen compound	5	1.07991	0.0924571	AT5G23510, AT1G53440, AT5G14120, AT2G39400, AT2G46330	436	89	22636	2.91671	1	0.80758	0.775524
GOTERM_BP_DIRECT	GO:0030242~pexophagy	2	0.431965	0.092471	AT3G19190, AT4G30790	436	5	22636	20.767	1	0.80758	0.775524
GOTERM_BP_DIRECT	GO:0009718~anthocyanin-containing compound biosynthetic process	3	0.647948	0.0944193	AT5G46760, AT3G21560, AT4G17880	436	27	22636	5.7686	1	0.813745	0.781444
GOTERM_BP_DIRECT	GO:0071456~cellular response to hypoxia	9	1.94384	0.0978131	AT5G65207, AT2G16060, AT1G25560, AT1G68840, AT1G72430, AT2G41430, AT1G09070, AT5G41080, AT3G30775	436	243	22636	1.92287	1	0.832046	0.799018
GOTERM_CC_DIRECT	GO:0005886~plasma membrane	134	28.9417	5.97402e-17	AT2G34510, AT5G46330, AT4G04960, AT4G31820, AT1G18210, AT3G16180, AT3G23550, AT4G23400, AT1G34300, AT1G63260, AT3G29810, AT2G38310, AT1G05810, AT1G53730, AT4G38690, AT5G13760, AT2G01420, AT1G14380, AT3G14310, AT1G20010, AT1G03870, AT2G46330, AT4G17870, AT4G23130, AT1G32190, AT1G70520, AT3G56480, AT2G31090, AT3G57330, AT5G65240, AT4G20260, AT4G14750, AT1G72300, AT5G53550, AT1G53440, AT3G12145, AT4…	447	3802	26013	2.05105	1.18794e-14	6.3922e-15	5.7948e-15
GOTERM_CC_DIRECT	GO:0009505~plant-type cell wall	30	6.47948	2.91646e-08	AT4G22690, AT1G58370, AT2G34510, AT5G65430, AT5G49360, AT3G16530, AT4G12420, AT1G78830, AT4G19410, AT1G09750, AT4G11290, AT3G14310, AT1G20010, AT4G30270, AT1G02640, AT4G25810, AT1G04040, AT5G64570, AT4G38420, AT2G16060, AT4G15800, AT5G51550, AT4G19420, AT3G52500, AT5G07830, AT3G13750, AT3G15356, AT1G01300, AT5G21105, AT1G20620	447	517	26013	3.37686	3.12061e-06	1.56031e-06	1.41448e-06
GOTERM_CC_DIRECT	GO:0005618~cell wall	32	6.91145	2.75036e-07	AT4G22690, AT1G58370, AT4G23820, AT5G65430, AT3G16530, AT4G12420, AT3G16850, AT3G62110, AT1G78830, AT5G65730, AT3G43270, AT4G19410, AT4G37800, AT1G09750, AT3G14310, AT1G20010, AT4G30270, AT1G32170, AT4G25810, AT1G04040, AT2G15880, AT3G59010, AT5G64570, AT5G57550, AT2G16060, AT4G19420, AT3G52500, AT5G07830, AT3G13750, AT3G15356, AT5G21105, AT1G20620	447	642	26013	2.90067	2.94285e-05	9.80963e-06	8.89284e-06
GOTERM_CC_DIRECT	GO:0005576~extracellular region	93	20.0864	1.13111e-06	AT1G63300, AT1G14210, AT1G66930, AT5G18460, AT2G14900, AT4G01610, AT1G55360, AT5G23210, AT3G07460, AT1G34300, AT1G63260, AT1G71400, AT5G47780, AT2G06925, AT5G43060, AT5G49360, AT1G02300, AT3G19400, AT3G16530, AT4G12420, AT3G16850, AT3G62110, AT4G38690, AT3G60130, AT1G78830, AT5G03120, AT5G65730, AT3G43270, AT1G14380, AT4G19410, AT4G37800, AT4G17030, AT3G14310, AT4G11290, AT1G03870, AT4G37520, AT1…	447	3283	26013	1.64852	0.000121021	3.02572e-05	2.74294e-05
GOTERM_CC_DIRECT	GO:0016021~integral component of membrane	150	32.3974	6.73758e-06	AT5G46330, AT4G04960, AT1G66930, AT3G05320, AT4G30850, AT1G11380, AT3G16180, AT3G23550, AT4G23400, AT1G34300, AT1G63260, AT5G47780, AT1G72416, AT4G36670, AT4G18205, AT1G53730, AT1G22550, AT3G20395, AT5G13760, AT1G23480, AT2G01420, AT2G31800, AT5G04530, AT2G46330, AT4G23130, AT1G66940, AT1G68600, AT4G17070, AT1G70520, AT2G31090, AT1G18740, AT3G57330, AT5G65240, AT1G72300, AT5G53550, AT1G53440, AT1…	447	6306	26013	1.38427	0.000720663	0.000144184	0.000130709
GOTERM_CC_DIRECT	GO:0000325~plant-type vacuole	30	6.47948	1.39739e-05	AT4G22690, AT4G01610, AT5G15350, AT5G23210, AT3G07460, AT5G14120, AT1G18210, AT5G49760, AT1G30420, AT2G39300, AT3G62150, AT3G19820, AT4G12420, AT4G32150, AT3G16850, AT3G62110, AT1G75220, AT1G20010, AT5G44020, AT1G59870, AT1G56340, AT1G04040, AT3G57330, AT3G26810, AT4G20260, AT5G13710, AT1G49240, AT2G26975, AT4G17140, AT1G20620	447	702	26013	2.48695	0.0014941	0.000249201	0.000225911
GOTERM_CC_DIRECT	GO:0005773~vacuole	29	6.2635	7.48608e-05	AT4G01610, AT5G15350, AT5G23210, AT3G07460, AT5G14120, AT1G18210, AT4G23400, AT5G49760, AT2G06925, AT2G39300, AT5G43060, AT3G19820, AT1G72150, AT4G32150, AT3G16850, AT3G62110, AT5G64620, AT4G11290, AT4G37520, AT5G44020, AT1G04040, AT3G57330, AT4G20260, AT5G13710, AT1G49240, AT2G26975, AT3G13750, AT4G17140, AT1G20620	447	732	26013	2.30552	0.00797841	0.0011443	0.00103736
GOTERM_CC_DIRECT	GO:0048046~apoplast	20	4.31965	0.000641916	AT1G32170, AT4G25810, AT5G64570, AT5G49360, AT5G57550, AT3G16530, AT4G12420, AT1G72150, AT4G15800, AT1G78830, AT5G65730, AT5G51550, AT4G37800, AT3G13750, AT3G14310, AT1G09750, AT4G30270, AT3G15356, AT4G39640, AT1G20620	447	477	26013	2.44003	0.0663999	0.00837824	0.00759522
GOTERM_CC_DIRECT	GO:0099503~secretory vesicle	11	2.37581	0.000704711	AT1G14210, AT3G16850, AT4G01610, AT1G56340, AT1G78830, AT3G07460, AT4G11290, AT1G09750, AT4G30270, AT1G03870, AT5G43060	447	169	26013	3.78782	0.072656	0.00837824	0.00759522
GOTERM_CC_DIRECT	GO:0009506~plasmodesma	31	6.69546	0.00185301	AT4G23400, AT1G63260, AT1G72150, AT4G12420, AT1G78830, AT4G19410, AT1G61900, AT4G11290, AT4G39640, AT4G30790, AT5G44020, AT1G56340, AT1G04040, AT2G39210, AT1G31540, AT4G11820, AT1G70520, AT2G34680, AT3G04740, AT4G20260, AT4G38420, AT5G13710, AT1G49240, AT2G16060, AT4G15800, AT5G51550, AT3G13750, AT4G17140, AT5G21105, AT1G20620, AT5G54380	447	985	26013	1.83151	0.180004	0.0198272	0.0179742
GOTERM_CC_DIRECT	GO:0009705~plant-type vacuole membrane	8	1.72786	0.00881459	AT1G22550, AT1G68600, AT1G16390, AT1G75220, AT2G02020, AT3G57330, AT2G38310, AT4G17870	447	135	26013	3.44857	0.61223	0.0857419	0.0777287
GOTERM_CC_DIRECT	GO:0031225~anchored component of membrane	11	2.37581	0.0127322	AT5G65390, AT2G34510, AT4G12420, AT5G15350, AT1G62790, AT1G77630, AT5G60490, AT1G61900, AT1G03870, AT3G29810, AT2G46330	447	254	26013	2.52024	0.746171	0.113529	0.102919
GOTERM_CC_DIRECT	GO:0005794~Golgi apparatus	31	6.69546	0.0147352	AT4G22690, AT4G01750, AT3G05320, AT4G25940, AT5G47780, AT2G39400, AT2G30010, AT3G29810, AT2G06925, AT1G01430, AT4G13410, AT1G72150, AT1G26670, AT1G75220, AT1G23480, AT1G78830, AT4G30270, AT1G22530, AT5G33290, AT5G16190, AT2G31110, AT4G25810, AT3G57330, AT2G16380, AT1G50430, AT5G12420, AT1G19360, AT1G78240, AT1G14290, AT4G17140, AT3G28180	447	1144	26013	1.57695	0.795747	0.121282	0.109947
GOTERM_CC_DIRECT	GO:0005764~lysosome	4	0.863931	0.0271114	AT1G02300, AT3G19400, AT4G01610, AT5G43060	447	38	26013	6.12575	0.947185	0.195626	0.177343
GOTERM_CC_DIRECT	GO:0046658~anchored component of plasma membrane	8	1.72786	0.0308662	AT4G12420, AT5G15350, AT1G09460, AT1G77630, AT1G61900, AT1G03870, AT3G29810, AT4G20260	447	174	26013	2.67562	0.965081	0.195626	0.177343
GOTERM_CC_DIRECT	GO:0005856~cytoskeleton	6	1.2959	0.0323615	AT4G14750, AT2G46225, AT1G49240, AT3G02170, AT3G56480, AT4G19410	447	103	26013	3.38998	0.970399	0.195626	0.177343
GOTERM_CC_DIRECT	GO:0005783~endoplasmic reticulum	26	5.61555	0.0328944	AT2G34510, AT3G04210, AT4G00300, AT5G47180, AT3G30180, AT3G21530, AT2G35880, AT2G39400, AT1G64170, AT4G25880, AT5G43060, AT3G19820, AT2G01420, AT3G53800, AT5G18290, AT3G05970, AT4G04955, AT1G59870, AT1G56340, AT1G09070, AT5G13710, AT5G12420, AT2G45510, AT1G14290, AT1G08930, AT5G25900	447	982	26013	1.54079	0.972093	0.195626	0.177343
GOTERM_CC_DIRECT	GO:0016020~membrane	26	5.61555	0.0340139	AT5G46330, AT5G14120, AT3G27770, AT3G23550, AT2G39400, AT1G30420, AT3G19820, AT4G09160, AT5G13760, AT1G19770, AT1G61900, AT1G33080, AT3G05970, AT1G57990, AT2G39210, AT5G55930, AT5G64570, AT5G53550, AT5G64410, AT3G14240, AT4G18197, AT2G03530, AT2G45170, AT5G07830, AT1G14290, AT3G25070	447	985	26013	1.5361	0.975346	0.195626	0.177343
GOTERM_CC_DIRECT	GO:0005887~integral component of plasma membrane	6	1.2959	0.0347373	AT5G09220, AT5G64410, AT5G55930, AT3G02600, AT4G35920, AT3G57330	447	105	26013	3.32541	0.977245	0.195626	0.177343
GOTERM_MF_DIRECT	GO:0004553~hydrolase activity, hydrolyzing O-glycosyl compounds	12	2.59179	9.1909e-06	AT1G32170, AT5G57550, AT1G58370, AT3G60130, AT4G25810, AT1G09460, AT5G65730, AT4G37800, AT4G30270, AT5G64570, AT1G02640, AT5G49360	362	113	19238	5.64357	0.00287263	0.00287675	0.00275727
GOTERM_MF_DIRECT	GO:0015144~carbohydrate transmembrane transporter activity	8	1.72786	6.41208e-05	AT4G36670, AT3G18830, AT1G08900, AT1G16390, AT1G75220, AT3G05150, AT3G05160, AT1G08930	362	54	19238	7.87313	0.0198704	0.00865759	0.00829801
GOTERM_MF_DIRECT	GO:0004672~protein kinase activity	30	6.47948	8.29801e-05	AT4G04960, AT5G46330, AT5G41260, AT1G66930, AT1G33770, AT1G55200, AT4G03390, AT5G49760, AT4G39400, AT1G53730, AT4G08470, AT1G49730, AT2G31800, AT3G47570, AT1G11350, AT4G23130, AT1G66940, AT1G70520, AT5G60270, AT3G22750, AT5G65240, AT4G04570, AT2G39180, AT1G74740, AT3G50500, AT5G03730, AT5G39020, AT1G52290, AT5G54380, AT5G56040	362	712	19238	2.2392	0.0256394	0.00865759	0.00829801
GOTERM_MF_DIRECT	GO:0030247~polysaccharide binding	9	1.94384	0.000194724	AT1G32170, AT1G21270, AT5G57550, AT1G66940, AT1G66930, AT4G25810, AT5G65730, AT4G37800, AT4G30270	362	85	19238	5.62697	0.0591339	0.0152371	0.0146043
GOTERM_MF_DIRECT	GO:0016762~xyloglucan:xyloglucosyl transferase activity	6	1.2959	0.000348565	AT1G32170, AT5G57550, AT4G25810, AT5G65730, AT4G37800, AT4G30270	362	33	19238	9.66248	0.103377	0.0218202	0.0209139
GOTERM_MF_DIRECT	GO:0004674~protein serine/threonine kinase activity	29	6.2635	0.000673079	AT1G12430, AT5G41260, AT1G66930, AT4G00720, AT1G34300, AT4G39400, AT4G08470, AT1G49730, AT2G31800, AT2G48010, AT3G47570, AT1G11350, AT4G23130, AT1G56140, AT1G70520, AT3G22750, AT1G56720, AT5G65240, AT4G04570, AT2G39180, AT1G21270, AT1G72300, AT1G53440, AT3G50500, AT5G03730, AT5G39020, AT1G52290, AT5G54380, AT5G56040	362	769	19238	2.00412	0.190019	0.0351123	0.0336539
GOTERM_MF_DIRECT	GO:0015211~purine nucleoside transmembrane transporter activity	5	1.07991	0.000814134	AT4G18205, AT1G57990, AT1G19770, AT1G57980, AT4G18197	362	23	19238	11.553	0.225027	0.0361825	0.0346797
GOTERM_MF_DIRECT	GO:0005345~purine nucleobase transmembrane transporter activity	5	1.07991	0.00096262	AT4G18205, AT1G57990, AT1G19770, AT1G57980, AT4G18197	362	24	19238	11.0716	0.260252	0.0361825	0.0346797
GOTERM_MF_DIRECT	GO:0043425~bHLH transcription factor binding	3	0.647948	0.00104039	AT5G46760, AT2G18300, AT4G17880	362	3	19238	53.1436	0.278059	0.0361825	0.0346797
GOTERM_MF_DIRECT	GO:0016301~kinase activity	24	5.18359	0.00124748	AT4G23130, AT4G04960, AT1G66940, AT5G46330, AT1G66930, AT4G00720, AT5G40450, AT4G00300, AT1G70520, AT5G60270, AT4G03390, AT5G21170, AT5G49760, AT1G60060, AT5G65240, AT4G04570, AT4G39400, AT1G49730, AT1G53440, AT3G50500, AT2G48010, AT1G21920, AT3G47570, AT5G56040	362	609	19238	2.09433	0.32342	0.0383442	0.0367516
GOTERM_MF_DIRECT	GO:0038023~signaling receptor activity	6	1.2959	0.00134756	AT1G12220, AT4G30850, AT5G05440, AT5G46790, AT2G38310, AT4G17870	362	44	19238	7.24686	0.344312	0.0383442	0.0367516
GOTERM_MF_DIRECT	GO:0005524~ATP binding	66	14.2549	0.00290414	AT1G13640, AT1G12430, AT4G04960, AT5G46330, AT1G66930, AT1G33770, AT4G00720, AT1G55200, AT1G34300, AT4G03390, AT5G49760, AT1G30420, AT3G62150, AT1G53730, AT1G50460, AT4G19530, AT2G31800, AT1G11350, AT3G05970, AT4G23130, AT1G56140, AT5G17880, AT5G60270, AT1G70520, AT3G57330, AT5G65240, AT5G45490, AT2G39180, AT1G21270, AT1G72300, AT1G53440, AT3G50500, AT2G03530, AT1G47840, AT5G03730, AT5G39020, AT4…	362	2473	19238	1.41831	0.597604	0.0757497	0.0726035
GOTERM_MF_DIRECT	GO:0042803~protein homodimerization activity	12	2.59179	0.00412461	AT4G39400, AT2G39180, AT5G03150, AT1G72630, AT3G61950, AT5G46790, AT2G42870, AT5G27380, AT2G38310, AT4G17870, AT3G28180, AT4G30790	362	229	19238	2.78482	0.725738	0.0993078	0.0951832
GOTERM_MF_DIRECT	GO:0051119~sugar transmembrane transporter activity	5	1.07991	0.00494105	AT1G08900, AT1G75220, AT3G05150, AT3G05160, AT1G08930	362	37	19238	7.18157	0.787833	0.10599	0.101588
GOTERM_MF_DIRECT	GO:0010427~abscisic acid binding	4	0.863931	0.0050794	AT5G05440, AT5G46790, AT2G38310, AT4G17870	362	19	19238	11.1881	0.796869	0.10599	0.101588
GOTERM_MF_DIRECT	GO:0019825~oxygen binding	3	0.647948	0.00692834	AT2G16060, AT3G10520, AT5G25900	362	7	19238	22.7758	0.886519	0.135536	0.129906
GOTERM_MF_DIRECT	GO:0004864~protein phosphatase inhibitor activity	4	0.863931	0.00774436	AT5G05440, AT5G46790, AT2G38310, AT4G17870	362	22	19238	9.66248	0.912264	0.142587	0.136665
GOTERM_MF_DIRECT	GO:0047259~glucomannan 4-beta-mannosyltransferase activity	3	0.647948	0.0115859	AT4G13410, AT1G23480, AT5G16190	362	9	19238	17.7145	0.973946	0.201466	0.193099
GOTERM_MF_DIRECT	GO:0022857~transmembrane transporter activity	13	2.80778	0.0148798	AT3G06450, AT2G39210, AT3G59310, AT3G23550, AT3G16180, AT1G16390, AT5G13760, AT5G62730, AT2G03530, AT3G05160, AT2G02020, AT1G33080, AT4G15540	362	311	19238	2.22144	0.990835	0.237375	0.227516
GOTERM_MF_DIRECT	GO:0045735~nutrient reservoir activity	4	0.863931	0.0151677	AT3G54620, AT5G44020, AT1G04040, AT3G62420	362	28	19238	7.59195	0.991636	0.237375	0.227516
GOTERM_MF_DIRECT	GO:0042802~identical protein binding	10	2.15983	0.020054	AT1G12220, AT4G39400, AT4G29080, AT5G46330, AT2G22810, AT5G28770, AT1G72300, AT5G46790, AT4G17870, AT5G56040	362	214	19238	2.48335	0.998237	0.278535	0.266967
GOTERM_MF_DIRECT	GO:0046556~alpha-L-arabinofuranosidase activity	3	0.647948	0.0204674	AT5G64570, AT1G02640, AT5G49360	362	12	19238	13.2859	0.998455	0.278535	0.266967
GOTERM_MF_DIRECT	GO:0009044~xylan 1,4-beta-xylosidase activity	3	0.647948	0.0204674	AT5G64570, AT1G02640, AT5G49360	362	12	19238	13.2859	0.998455	0.278535	0.266967
GOTERM_MF_DIRECT	GO:0000166~nucleotide binding	5	1.07991	0.0275444	AT1G12220, AT1G09430, AT1G09750, AT2G34470, AT3G12610	362	61	19238	4.35604	0.99984	0.359224	0.344305
GOTERM_MF_DIRECT	GO:0016759~cellulose synthase activity	4	0.863931	0.0296319	AT4G13410, AT1G23480, AT3G28180, AT5G16190	362	36	19238	5.90485	0.999919	0.370992	0.355583
GOTERM_MF_DIRECT	GO:0005516~calmodulin binding	11	2.37581	0.033963	AT1G11350, AT4G14750, AT3G19820, AT4G28710, AT1G74740, AT5G57940, AT1G14380, AT5G65970, AT1G34300, AT3G57330, AT4G20260	362	273	19238	2.14132	0.99998	0.396032	0.379583
GOTERM_MF_DIRECT	GO:0004197~cysteine-type endopeptidase activity	5	1.07991	0.0354012	AT1G02300, AT3G19400, AT4G01610, AT5G65450, AT5G43060	362	66	19238	4.02603	0.999987	0.396032	0.379583
GOTERM_MF_DIRECT	GO:0010329~auxin efflux transmembrane transporter activity	3	0.647948	0.0354278	AT3G62150, AT1G59870, AT2G01420	362	16	19238	9.96443	0.999988	0.396032	0.379583
GOTERM_MF_DIRECT	GO:0035673~oligopeptide transmembrane transporter activity	3	0.647948	0.0440785	AT5G53550, AT5G64410, AT5G55930	362	18	19238	8.85727	0.999999	0.475744	0.455985
GOTERM_MF_DIRECT	GO:0005344~oxygen transporter activity	2	0.431965	0.0552479	AT2G16060, AT3G10520	362	3	19238	35.4291	1	0.57642	0.552479
GOTERM_MF_DIRECT	GO:0004714~transmembrane receptor protein tyrosine kinase activity	5	1.07991	0.0708302	AT4G39400, AT1G53730, AT1G49730, AT1G55200, AT5G54380	362	83	19238	3.20142	1	0.715156	0.685453
GOTERM_MF_DIRECT	GO:0051753~mannan synthase activity	3	0.647948	0.0906688	AT4G13410, AT1G23480, AT5G16190	362	27	19238	5.90485	1	0.886854	0.85002
GOTERM_MF_DIRECT	GO:0004675~transmembrane receptor protein serine/threonine kinase activity	4	0.863931	0.0990132	AT4G04960, AT5G46330, AT5G60270, AT5G49760	362	59	19238	3.60296	1	0.931551	0.89286
